# Supplementary material for: The global population of SARS-CoV-2 is composed of six major subtypes
Source: bioRxiv or medRxiv preprint supplement (doi:10.1101/2020.04.14.040782), 2020-04-20

a)

### Clusters

- Major
- Minor

### nt mutation

- U [N=183]
- C [N=410]

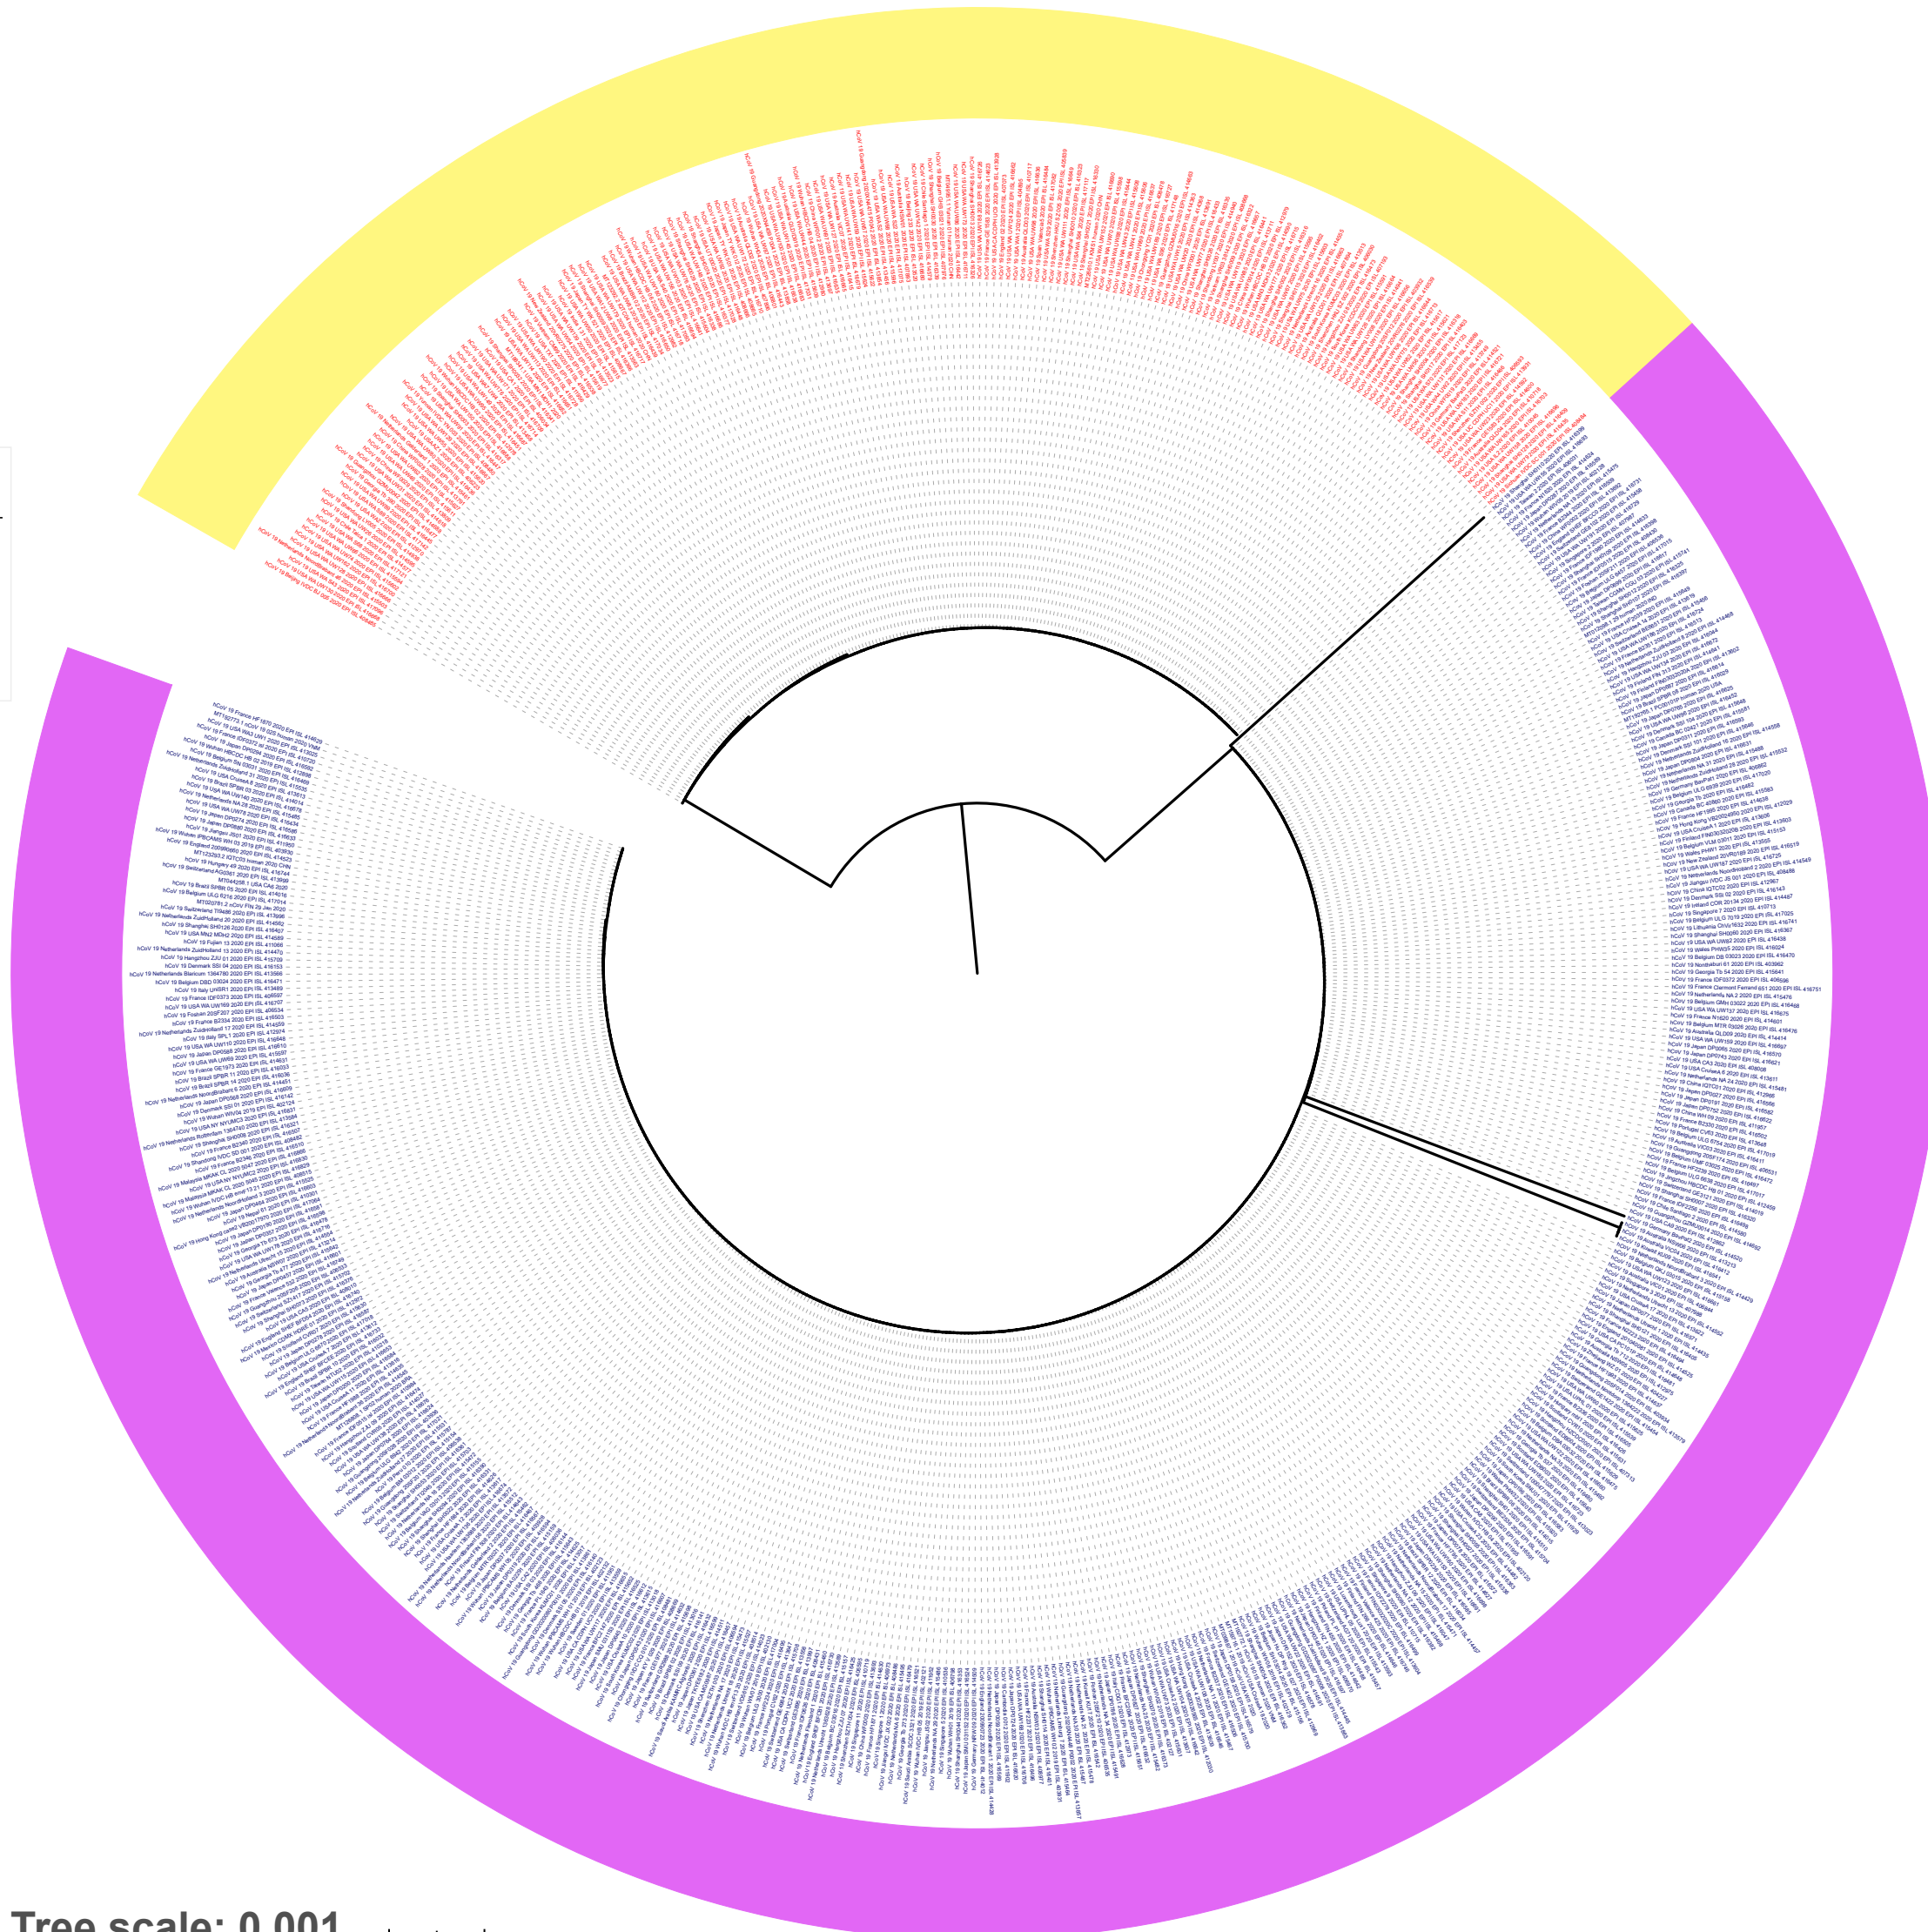

Tree scale: 0.001

b)

### Clusters

- Major
- Minor

### nt mutation

- C [N=1]
- U [N=99]
- G [N=493]

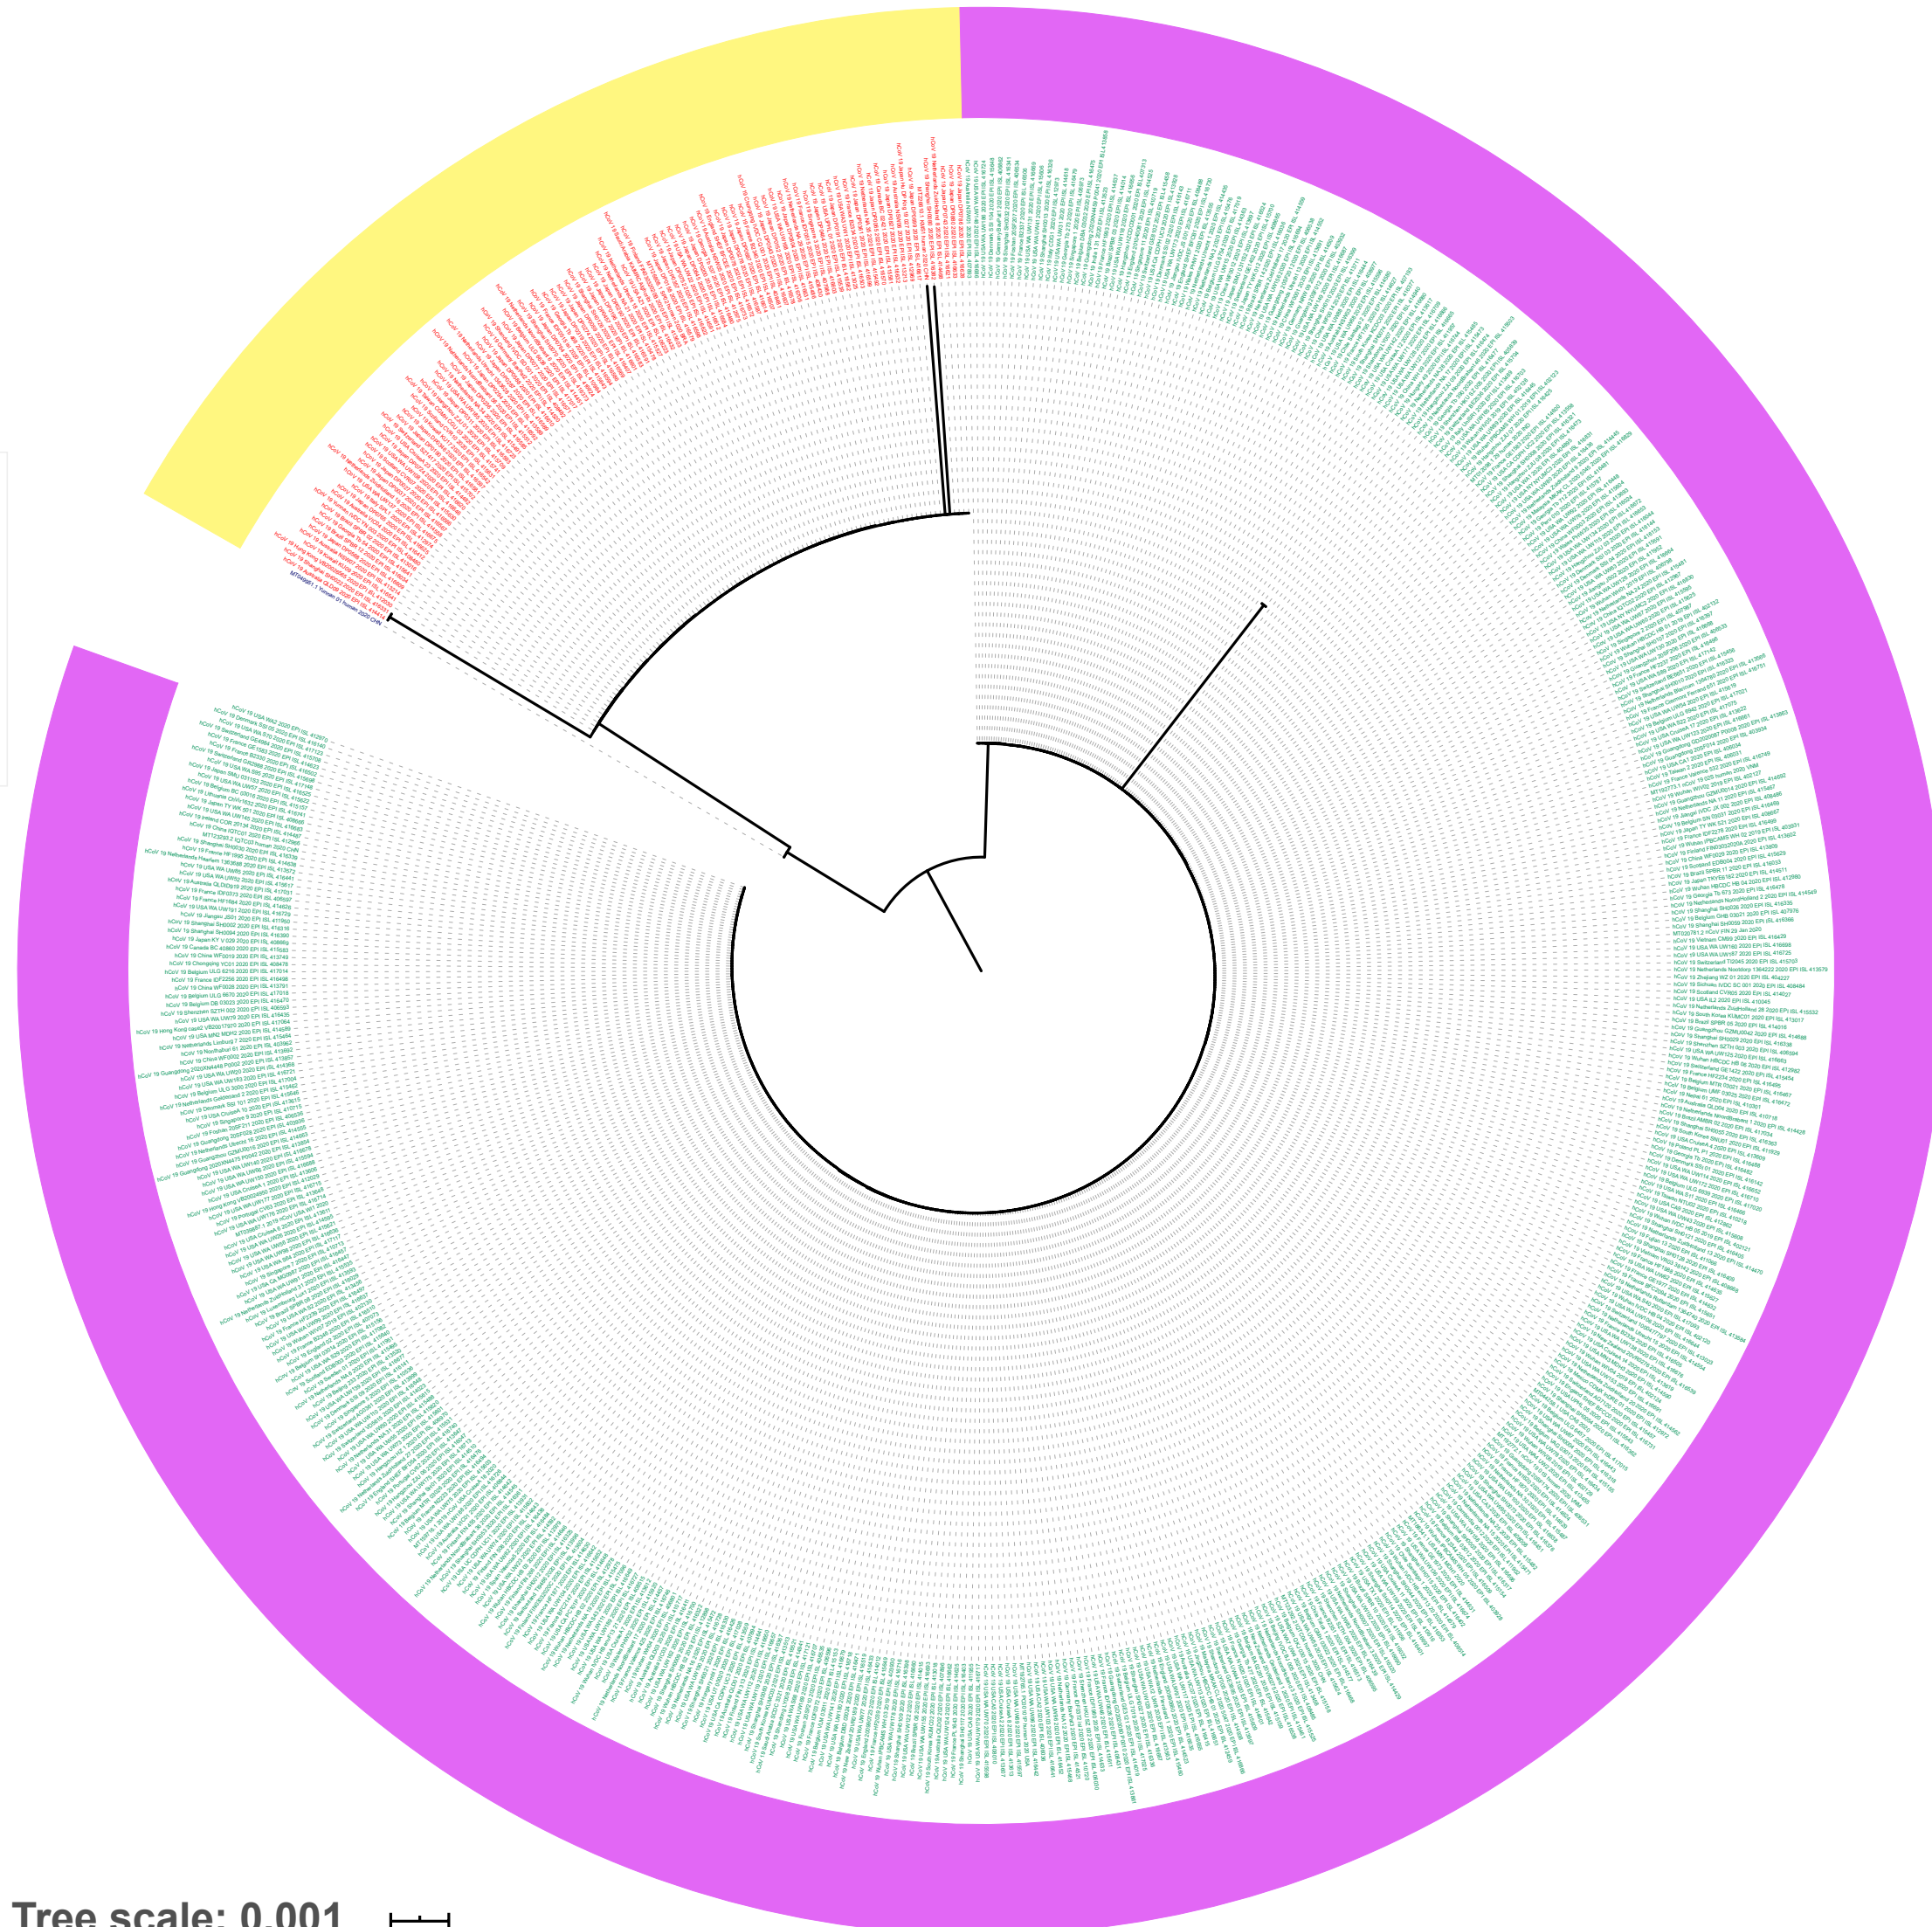

Tree scale: 0.001

c)

### Clusters

- Major
- Minor

### nt mutation

- C [N=409]
- U [N=184]

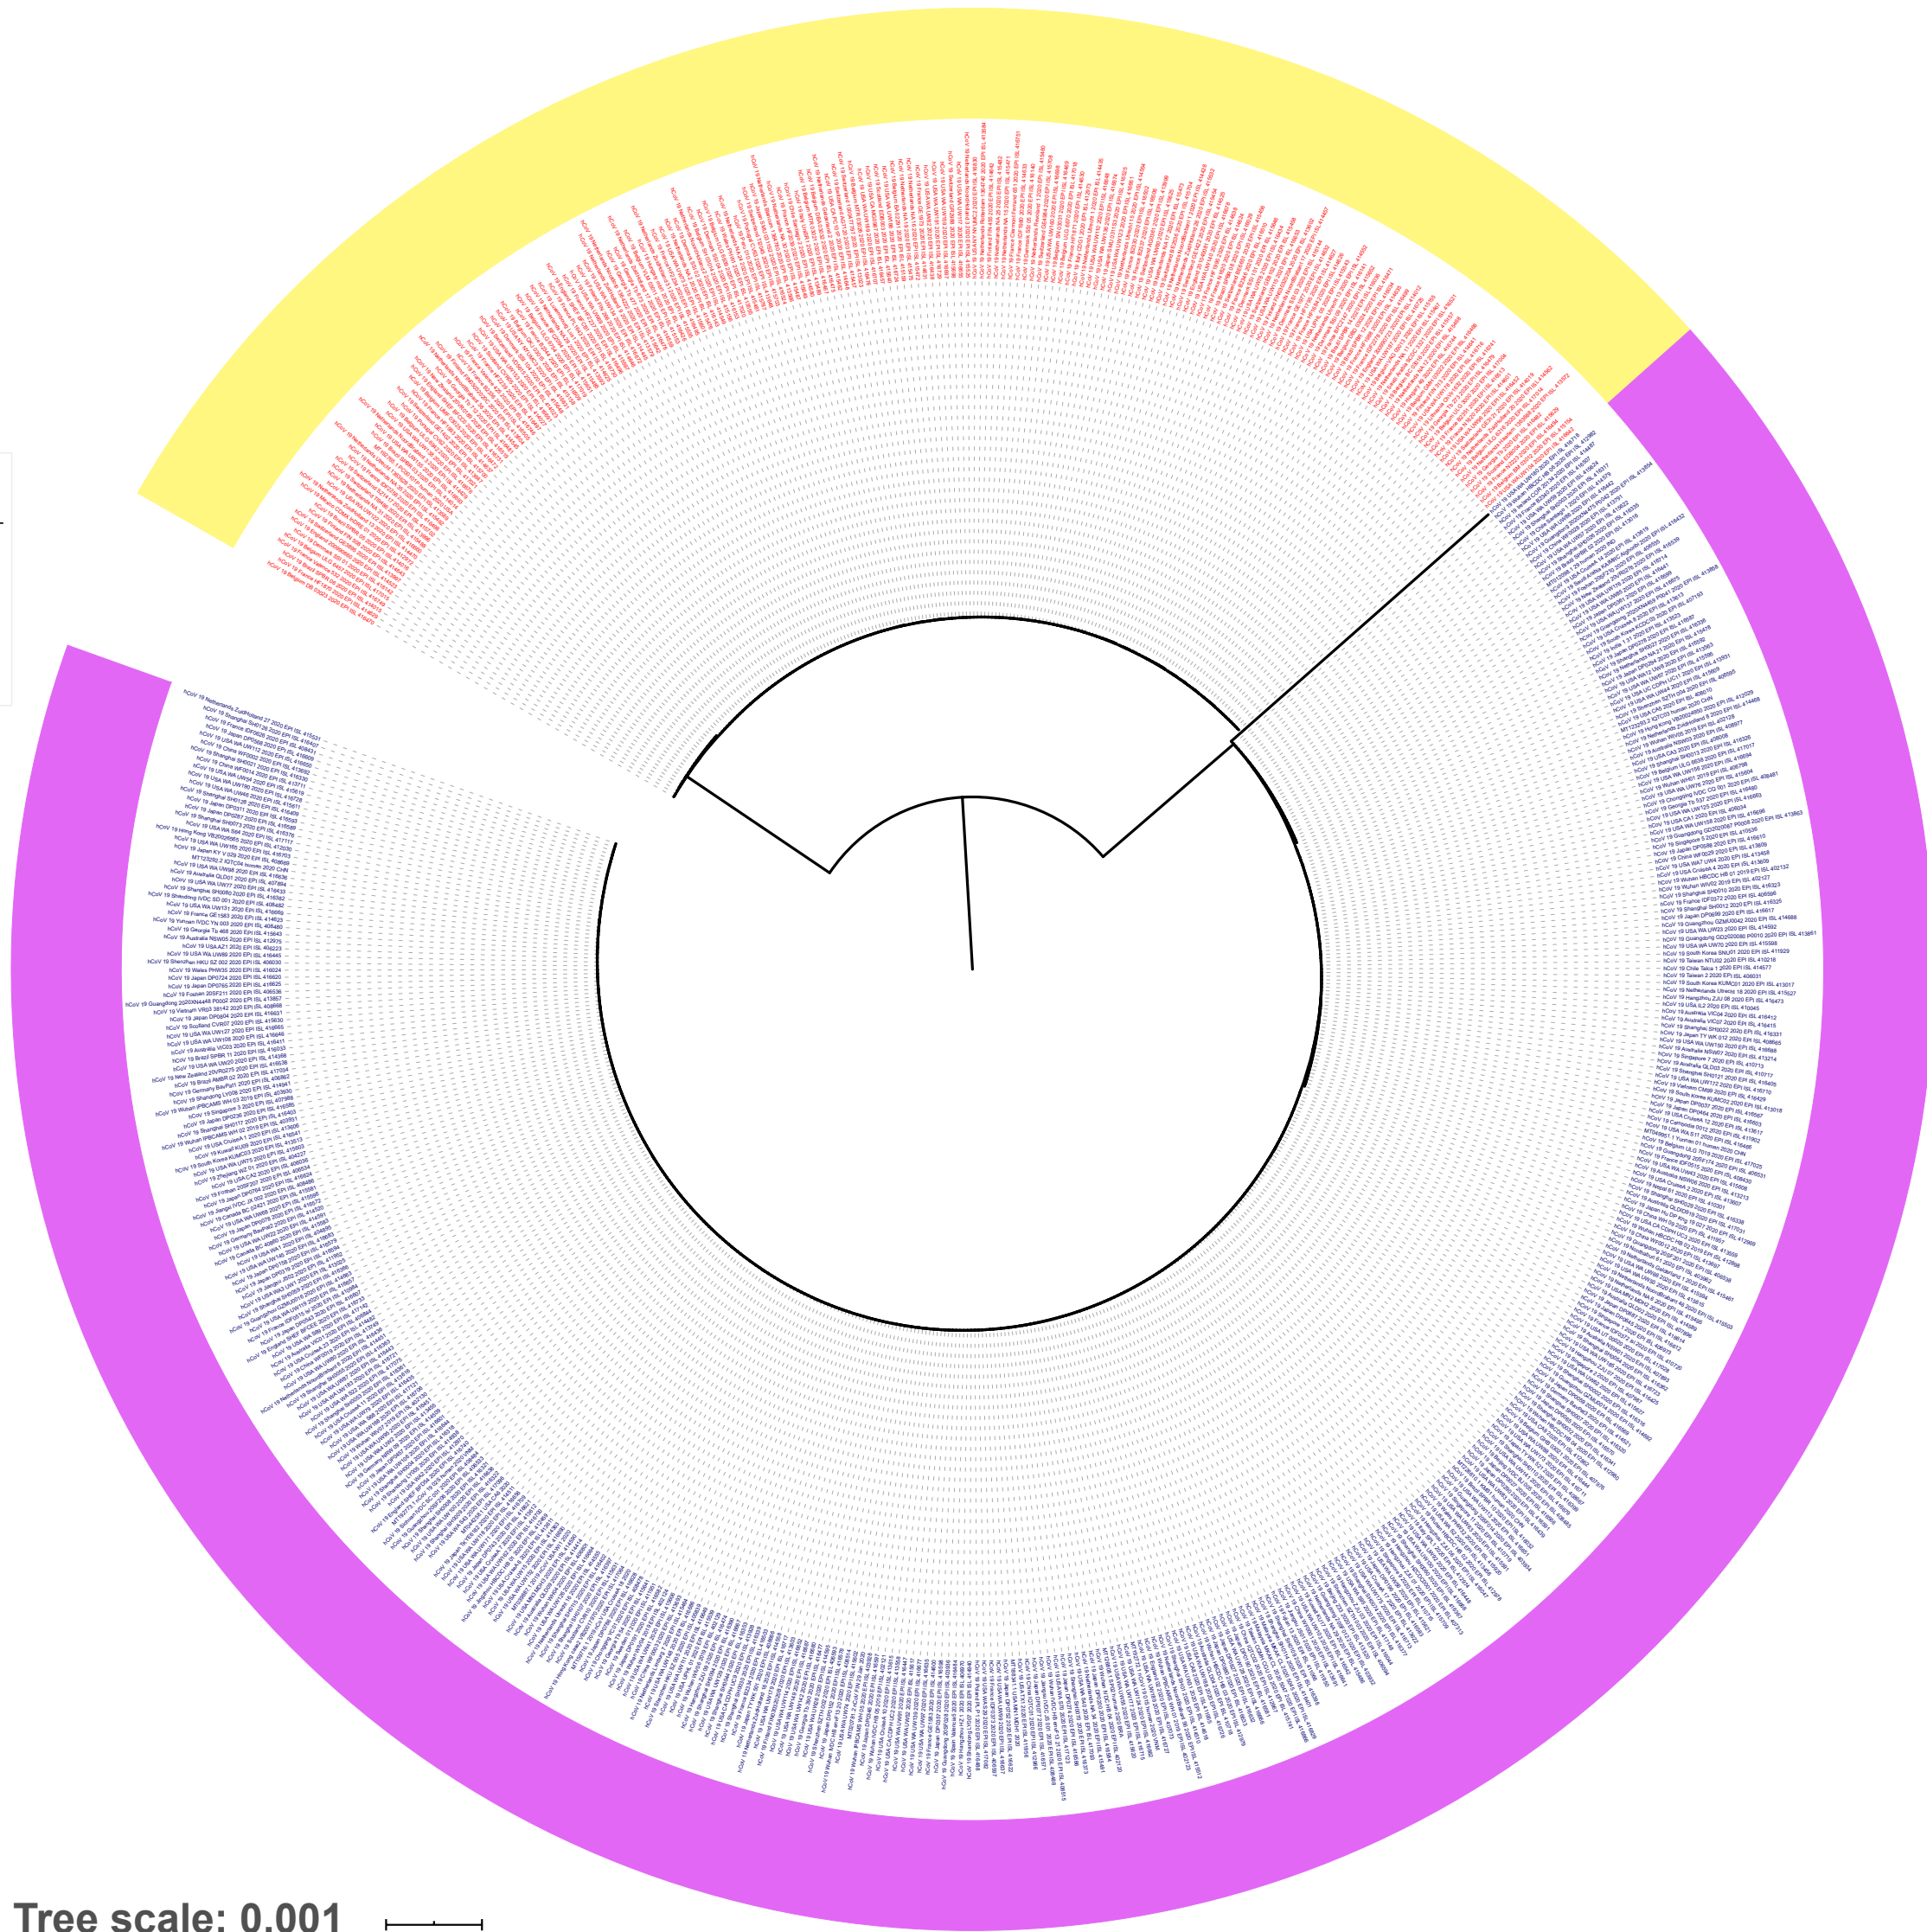

Tree scale: 0.001

d)

### Clusters

- Major
- Minor

### nt mutation

- CAC [N=488]
- UGU [N=101]
- CAU [N=4]

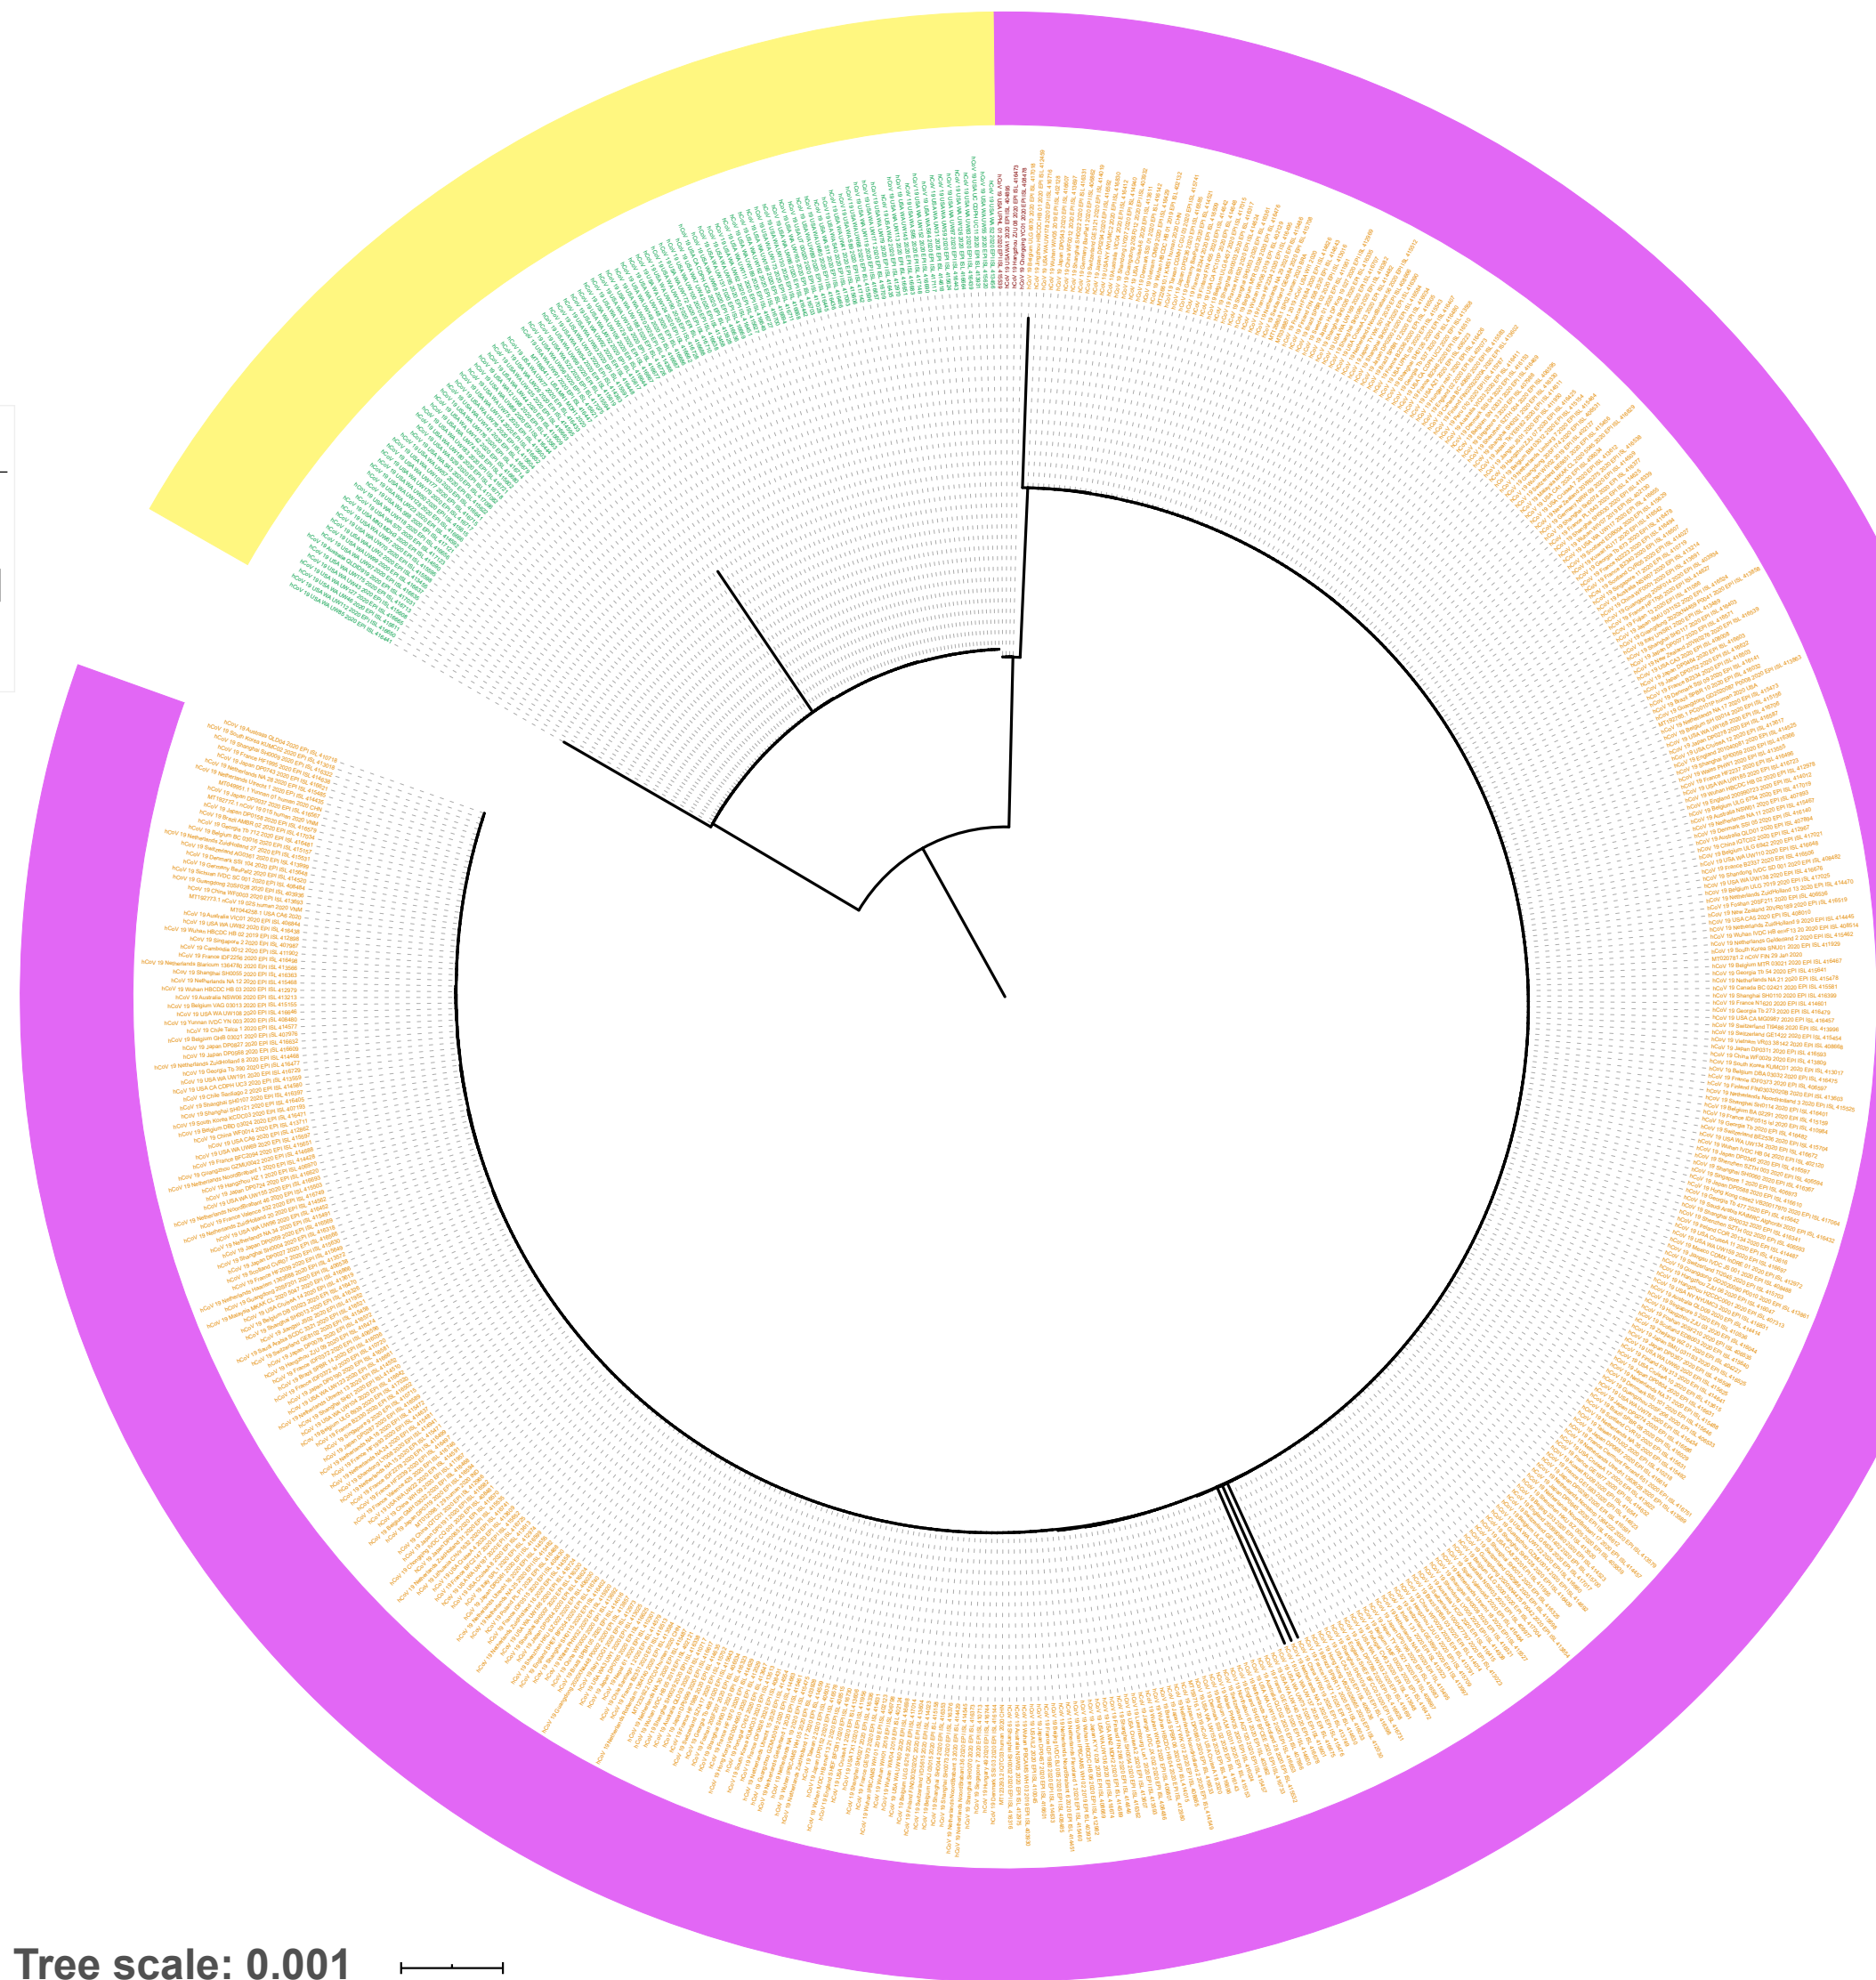

Tree scale: 0.001

e)

### Clusters

- Major
- Minor

### nt mutation

- G [N=185]
- A [N=408]

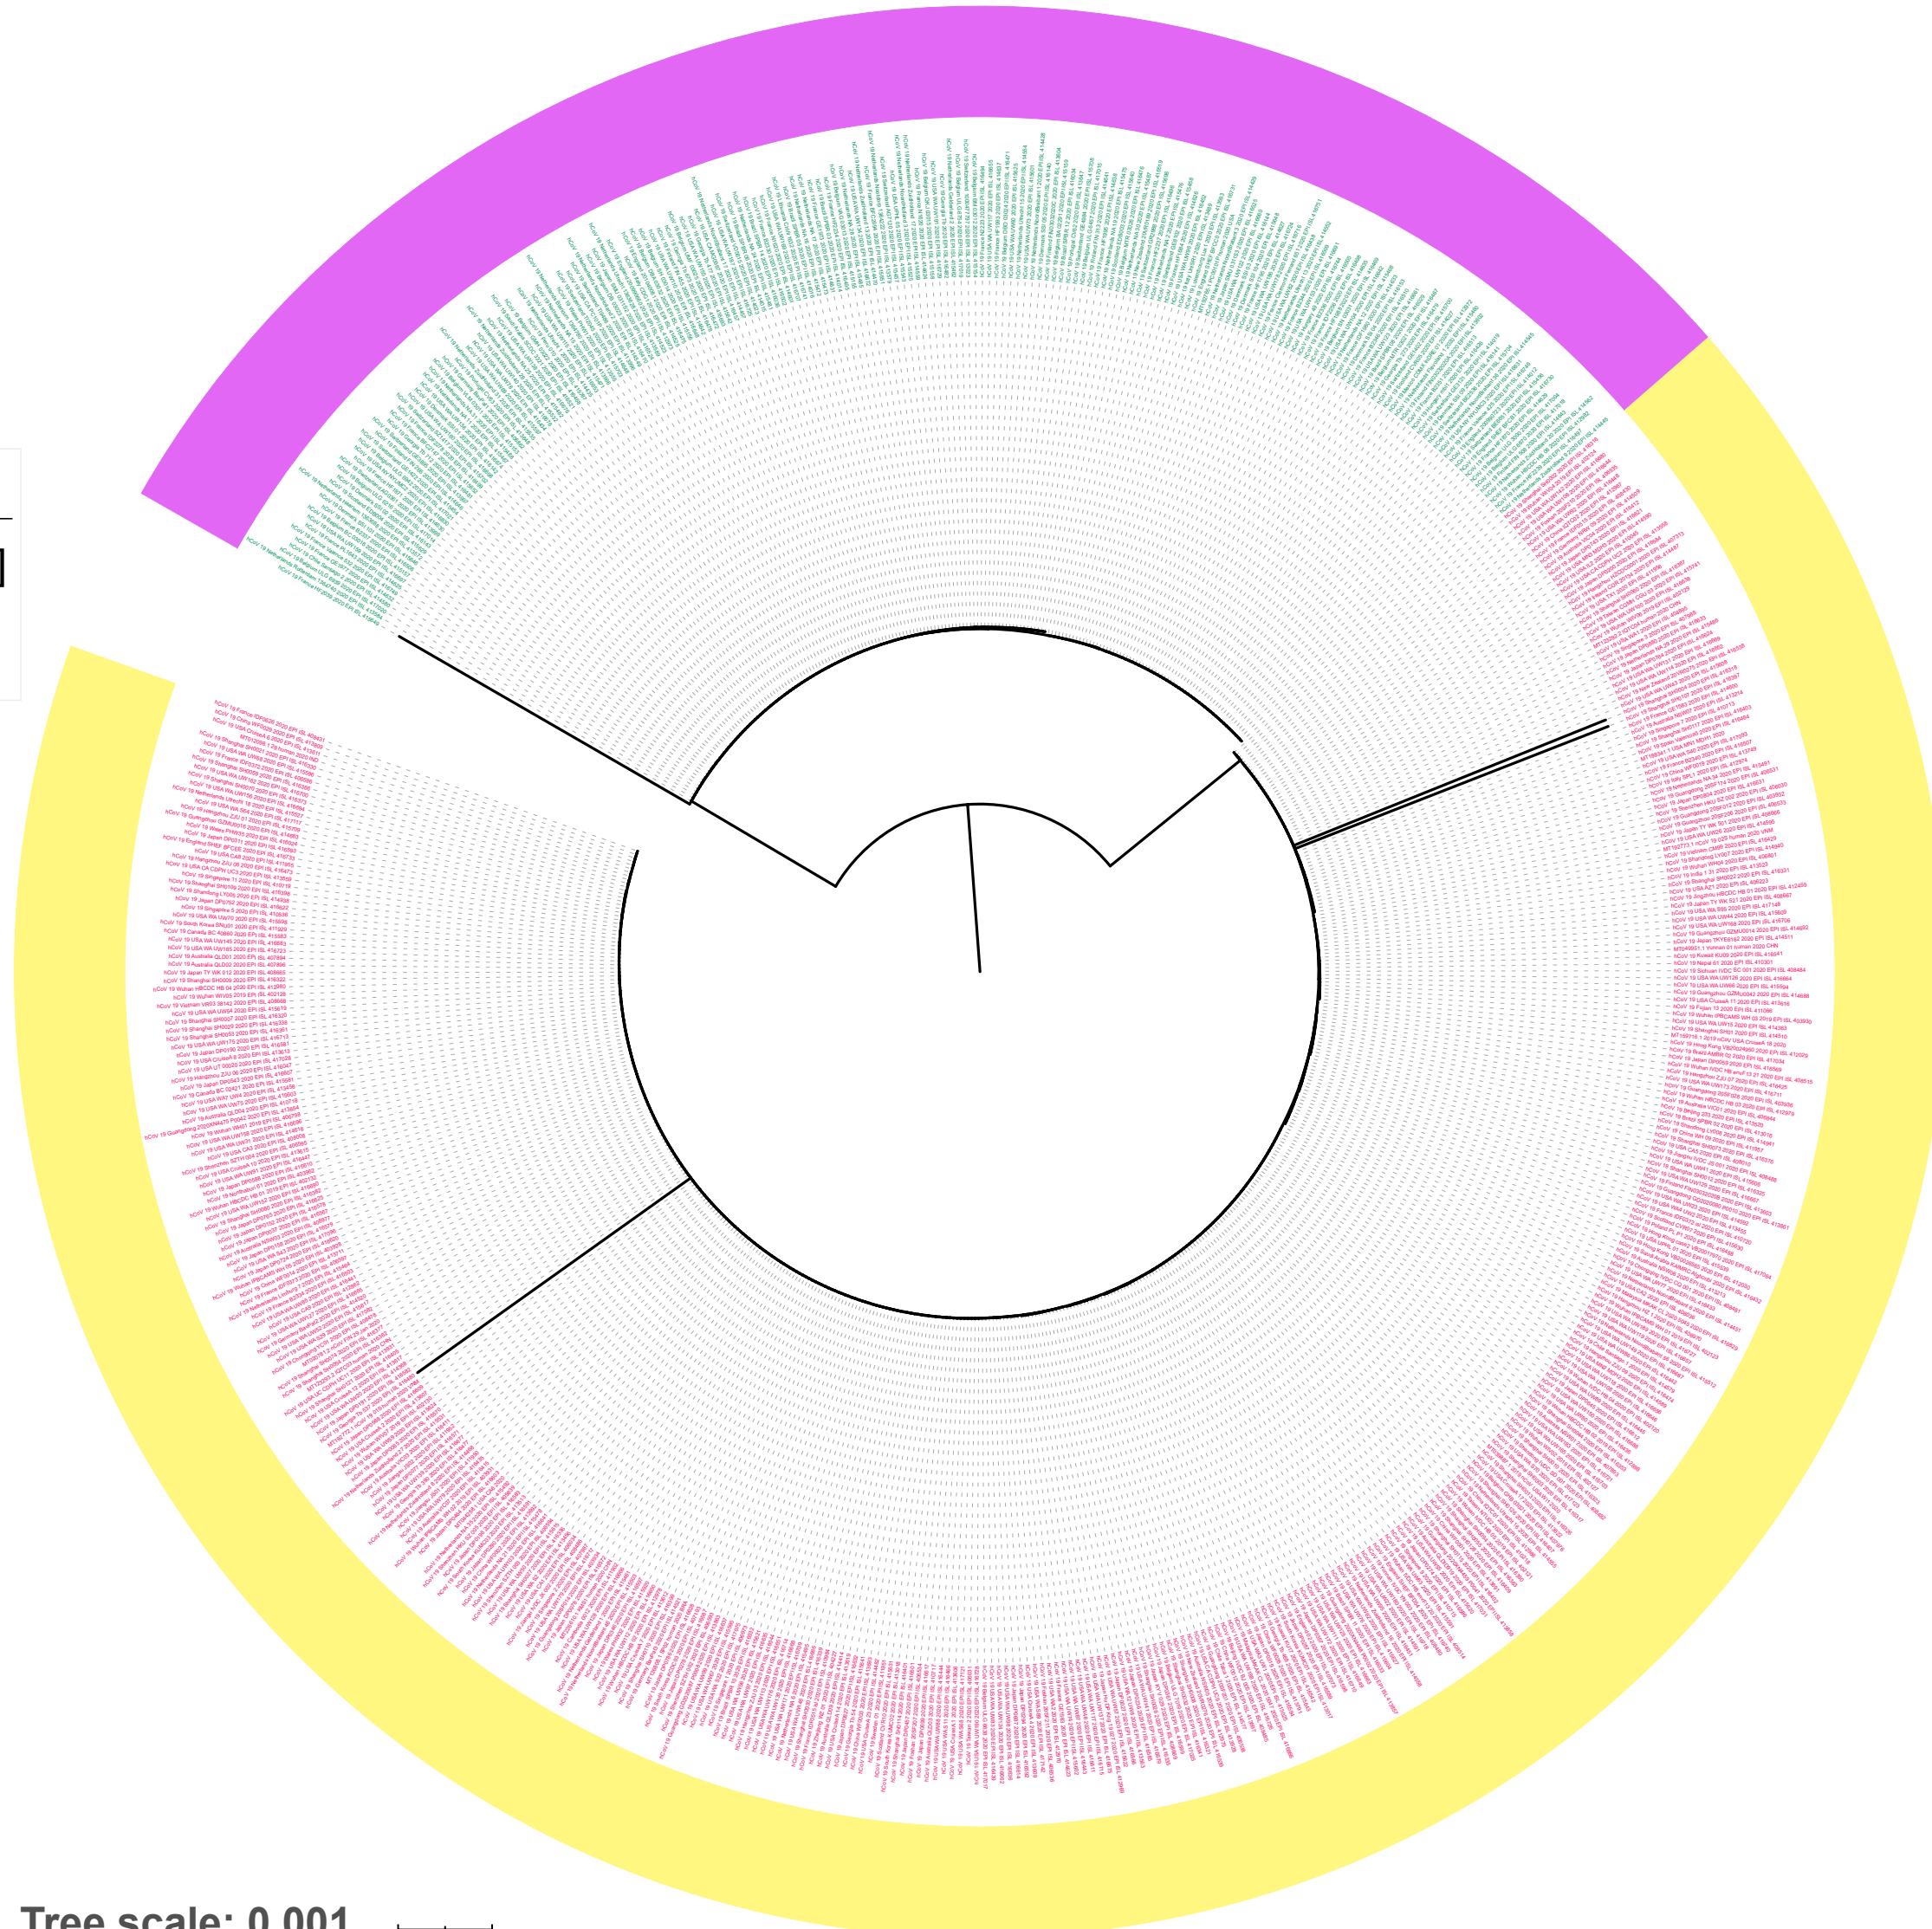

Tree scale: 0.001

f)

### Clusters

- Major
- Minor

### nt mutation

- U [N=409]
- C [N=184]

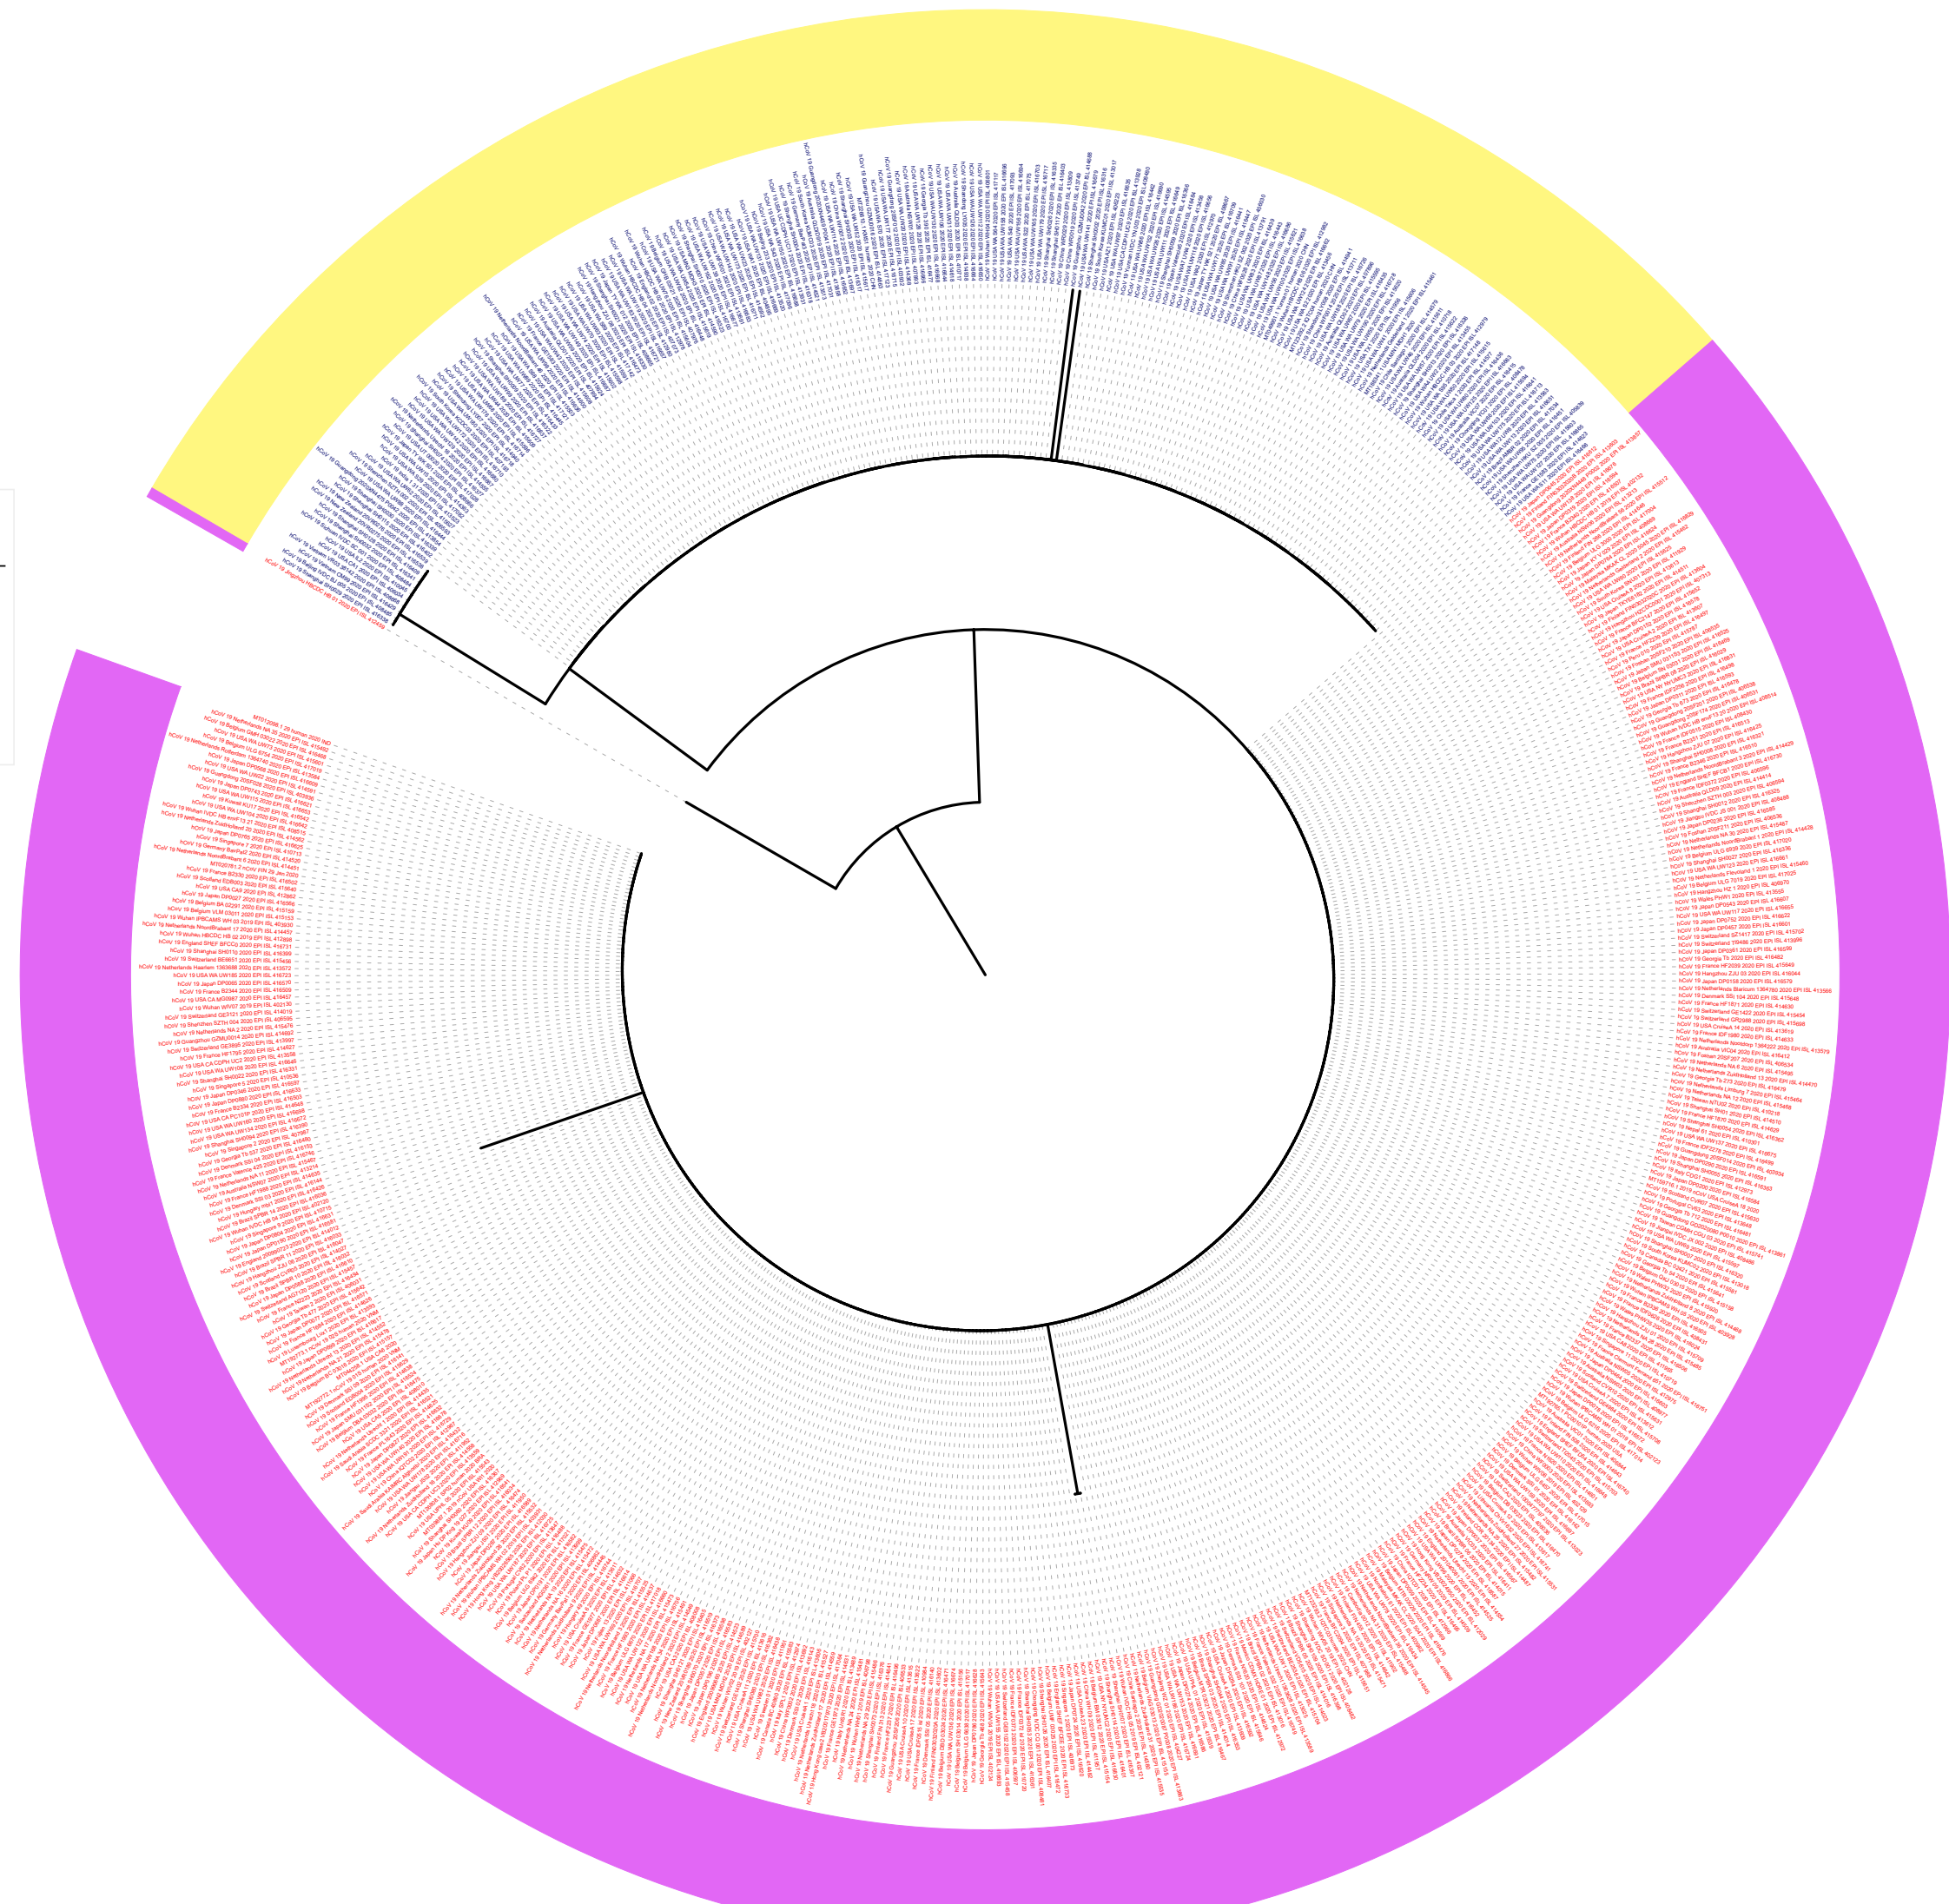

Tree scale: 0.001

g)

### Clusters

- Major
- Minor

### nt mutation

- AAC [N=60]
- GGG [N=533]

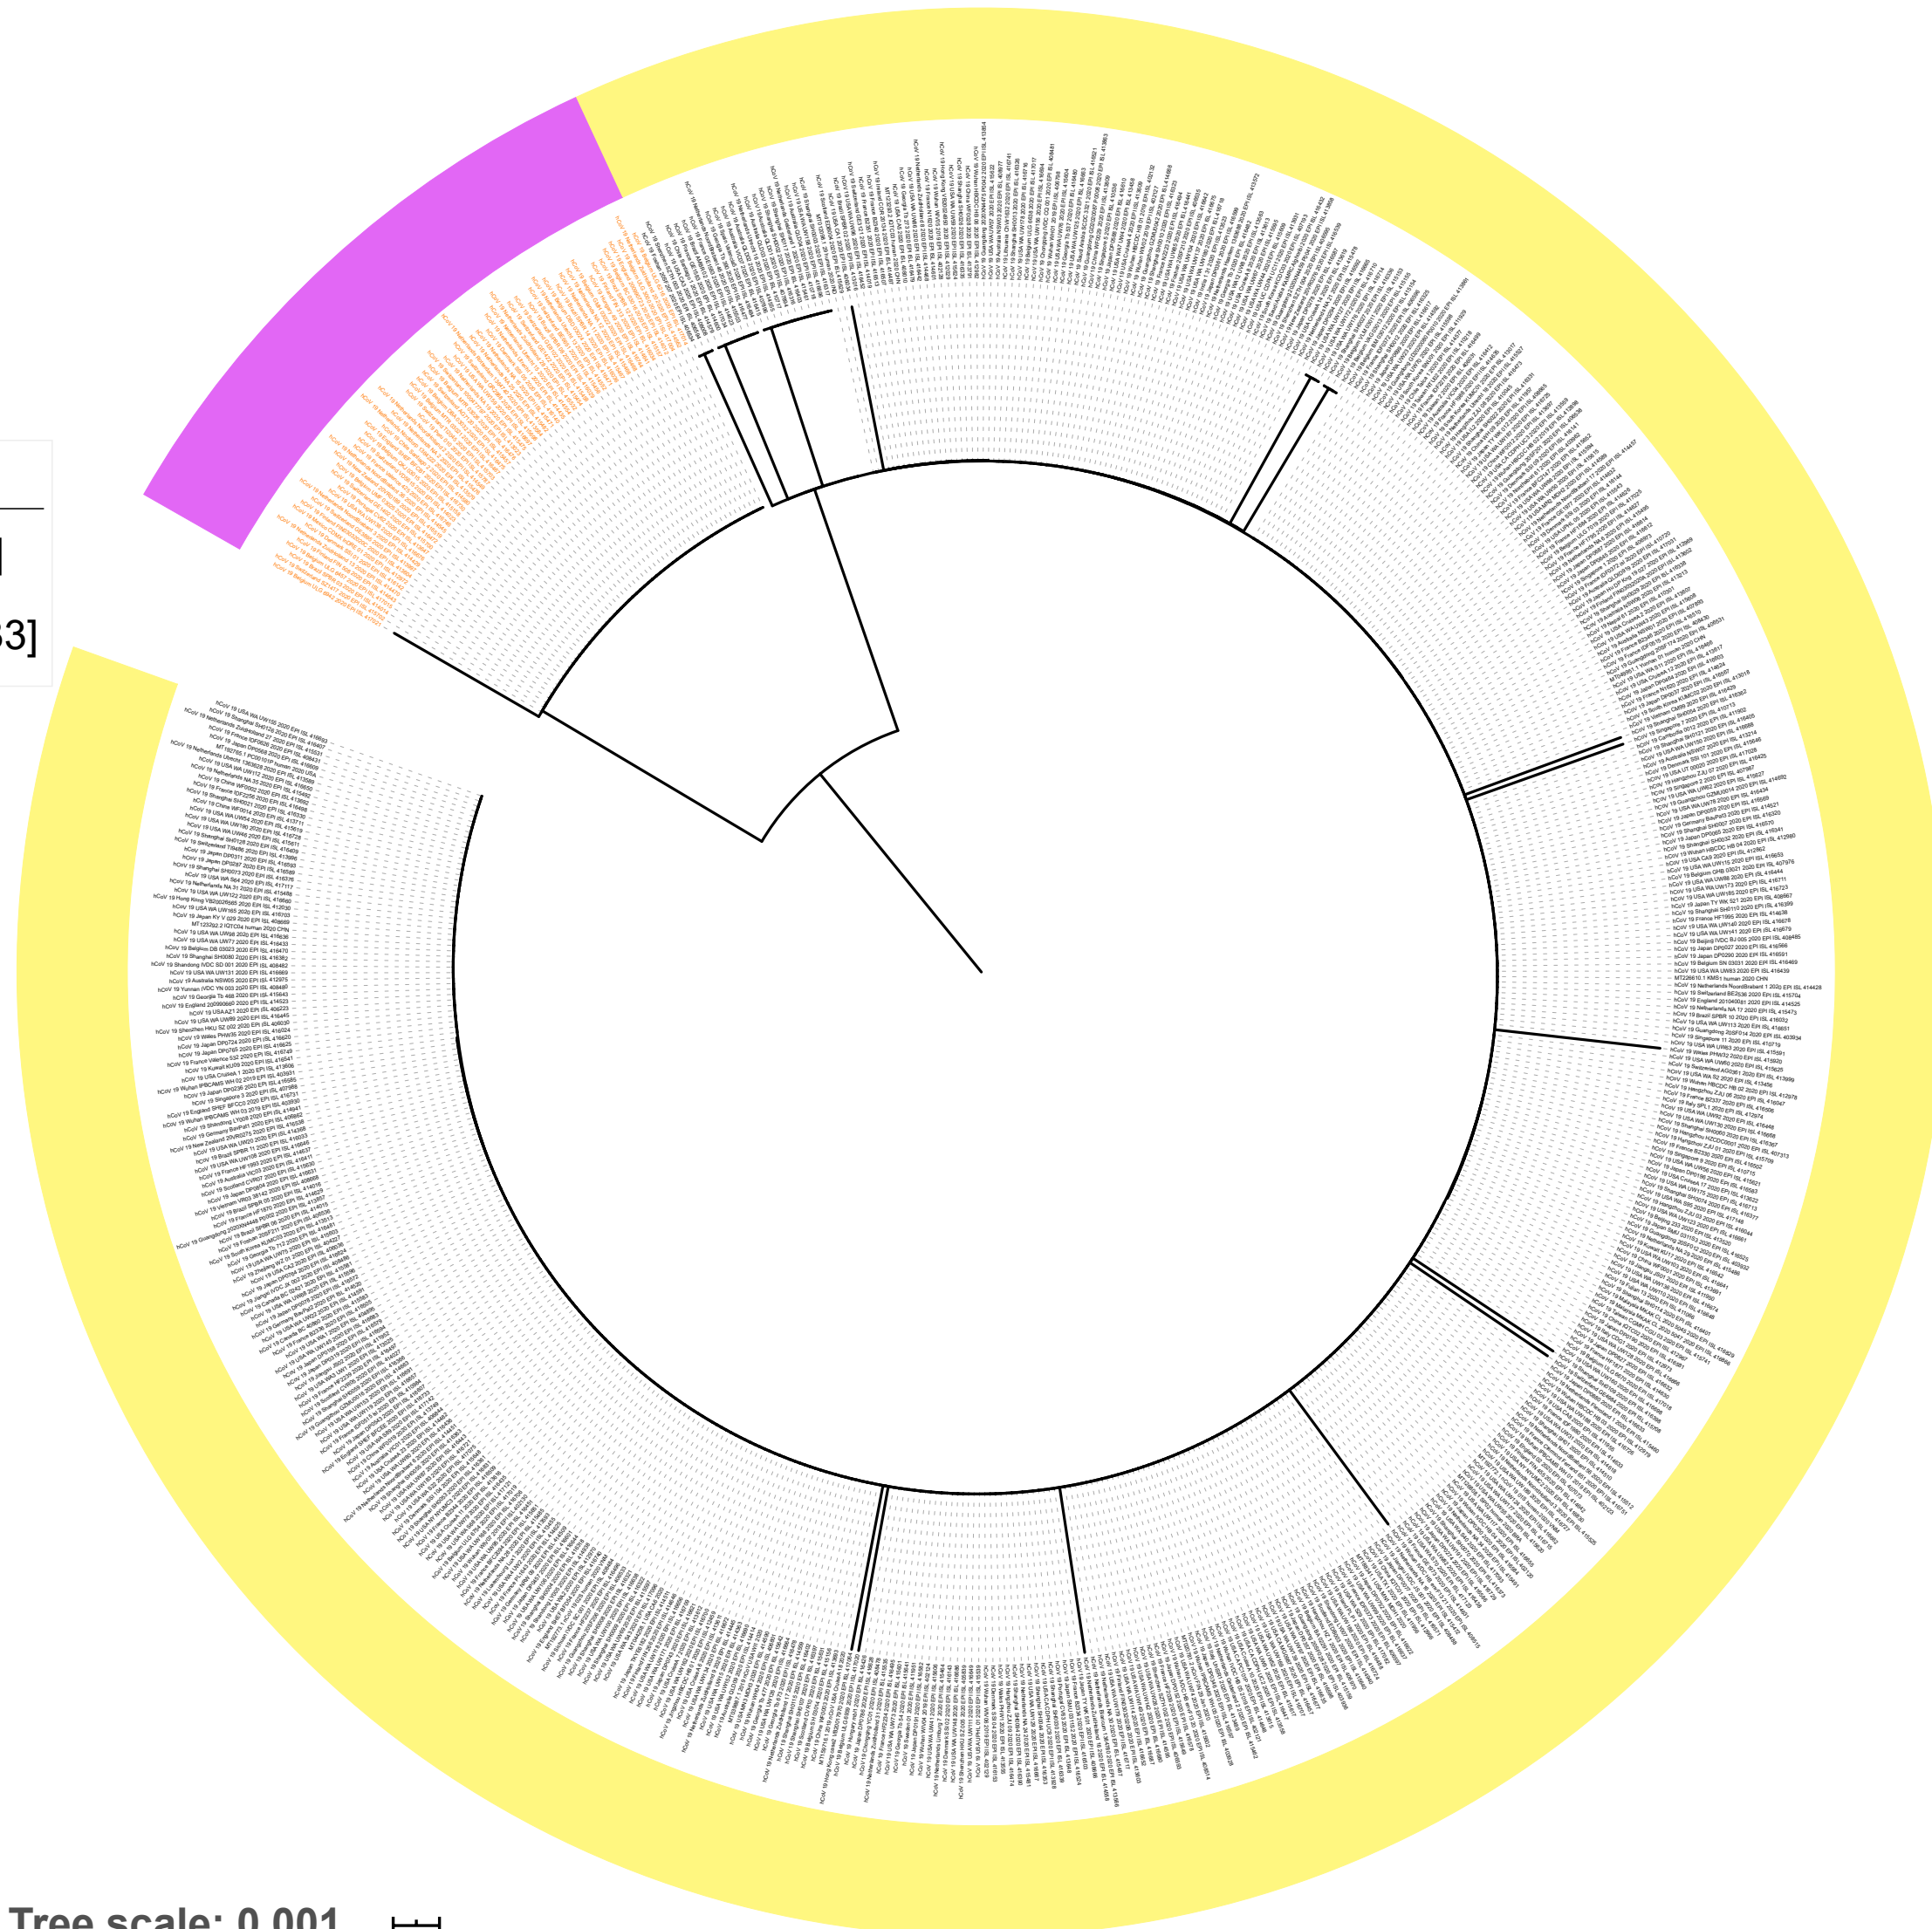

Tree scale: 0.001

a)

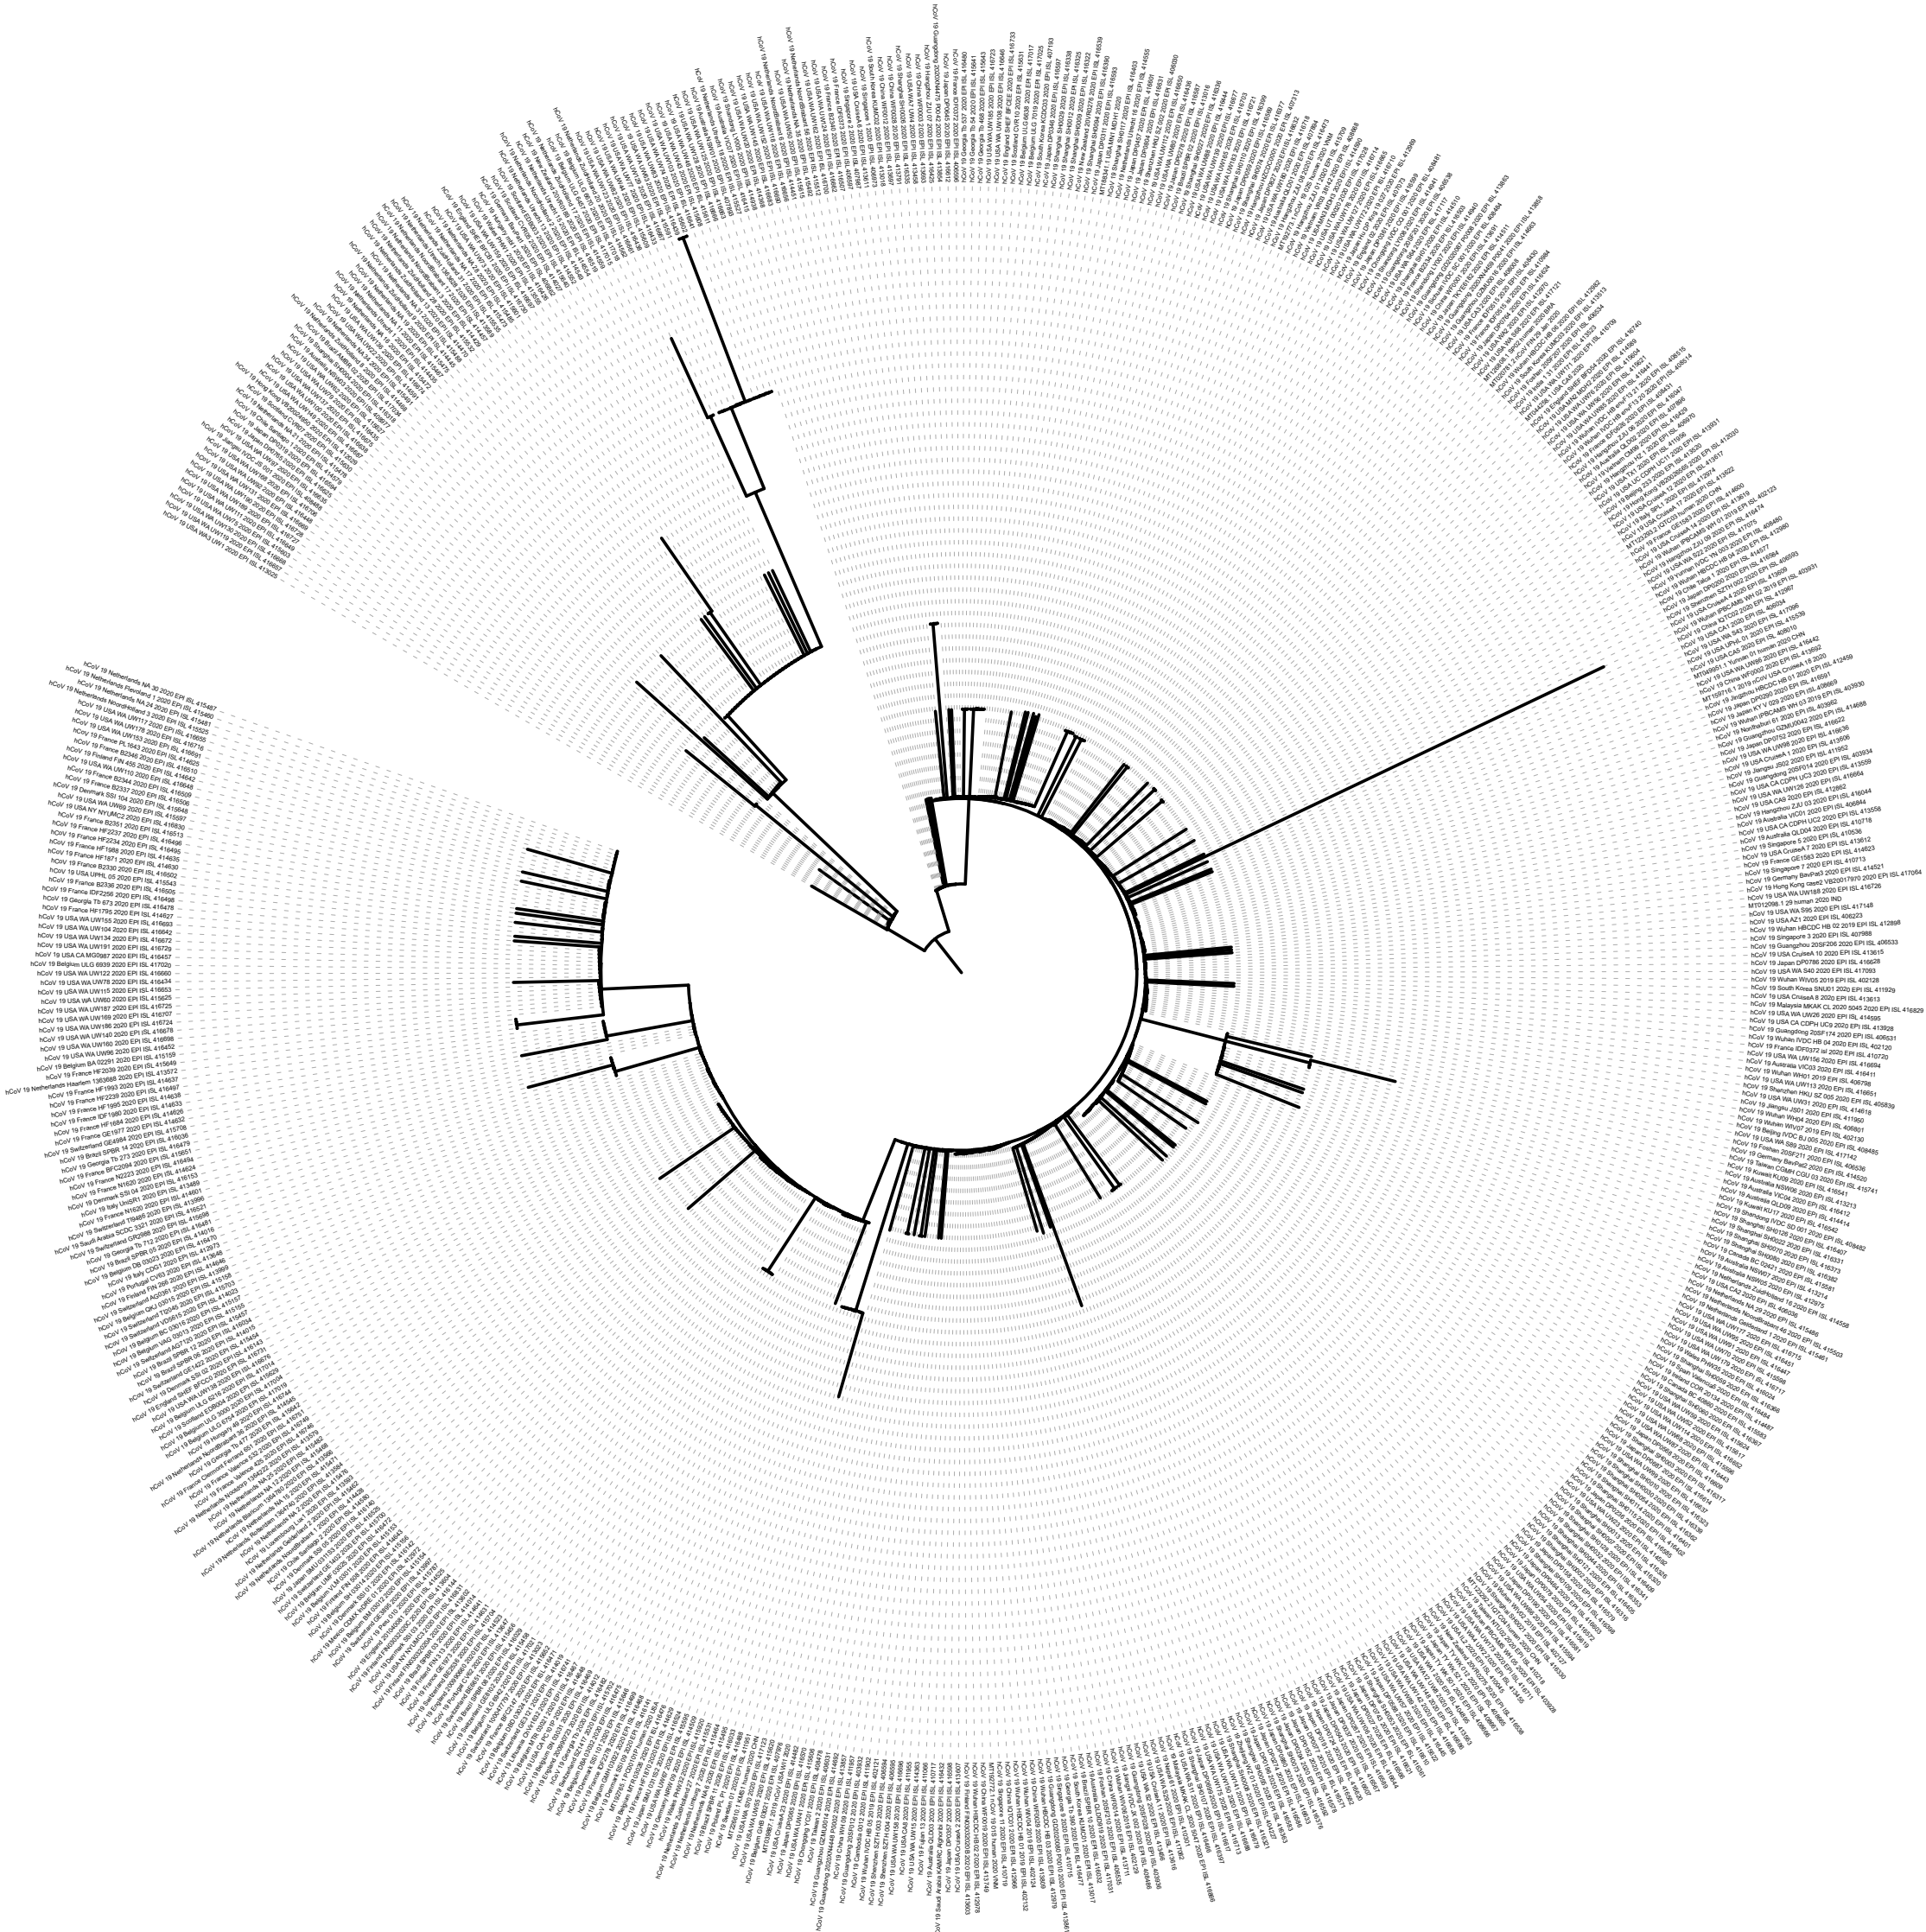

Tree scale: 0.001



b)

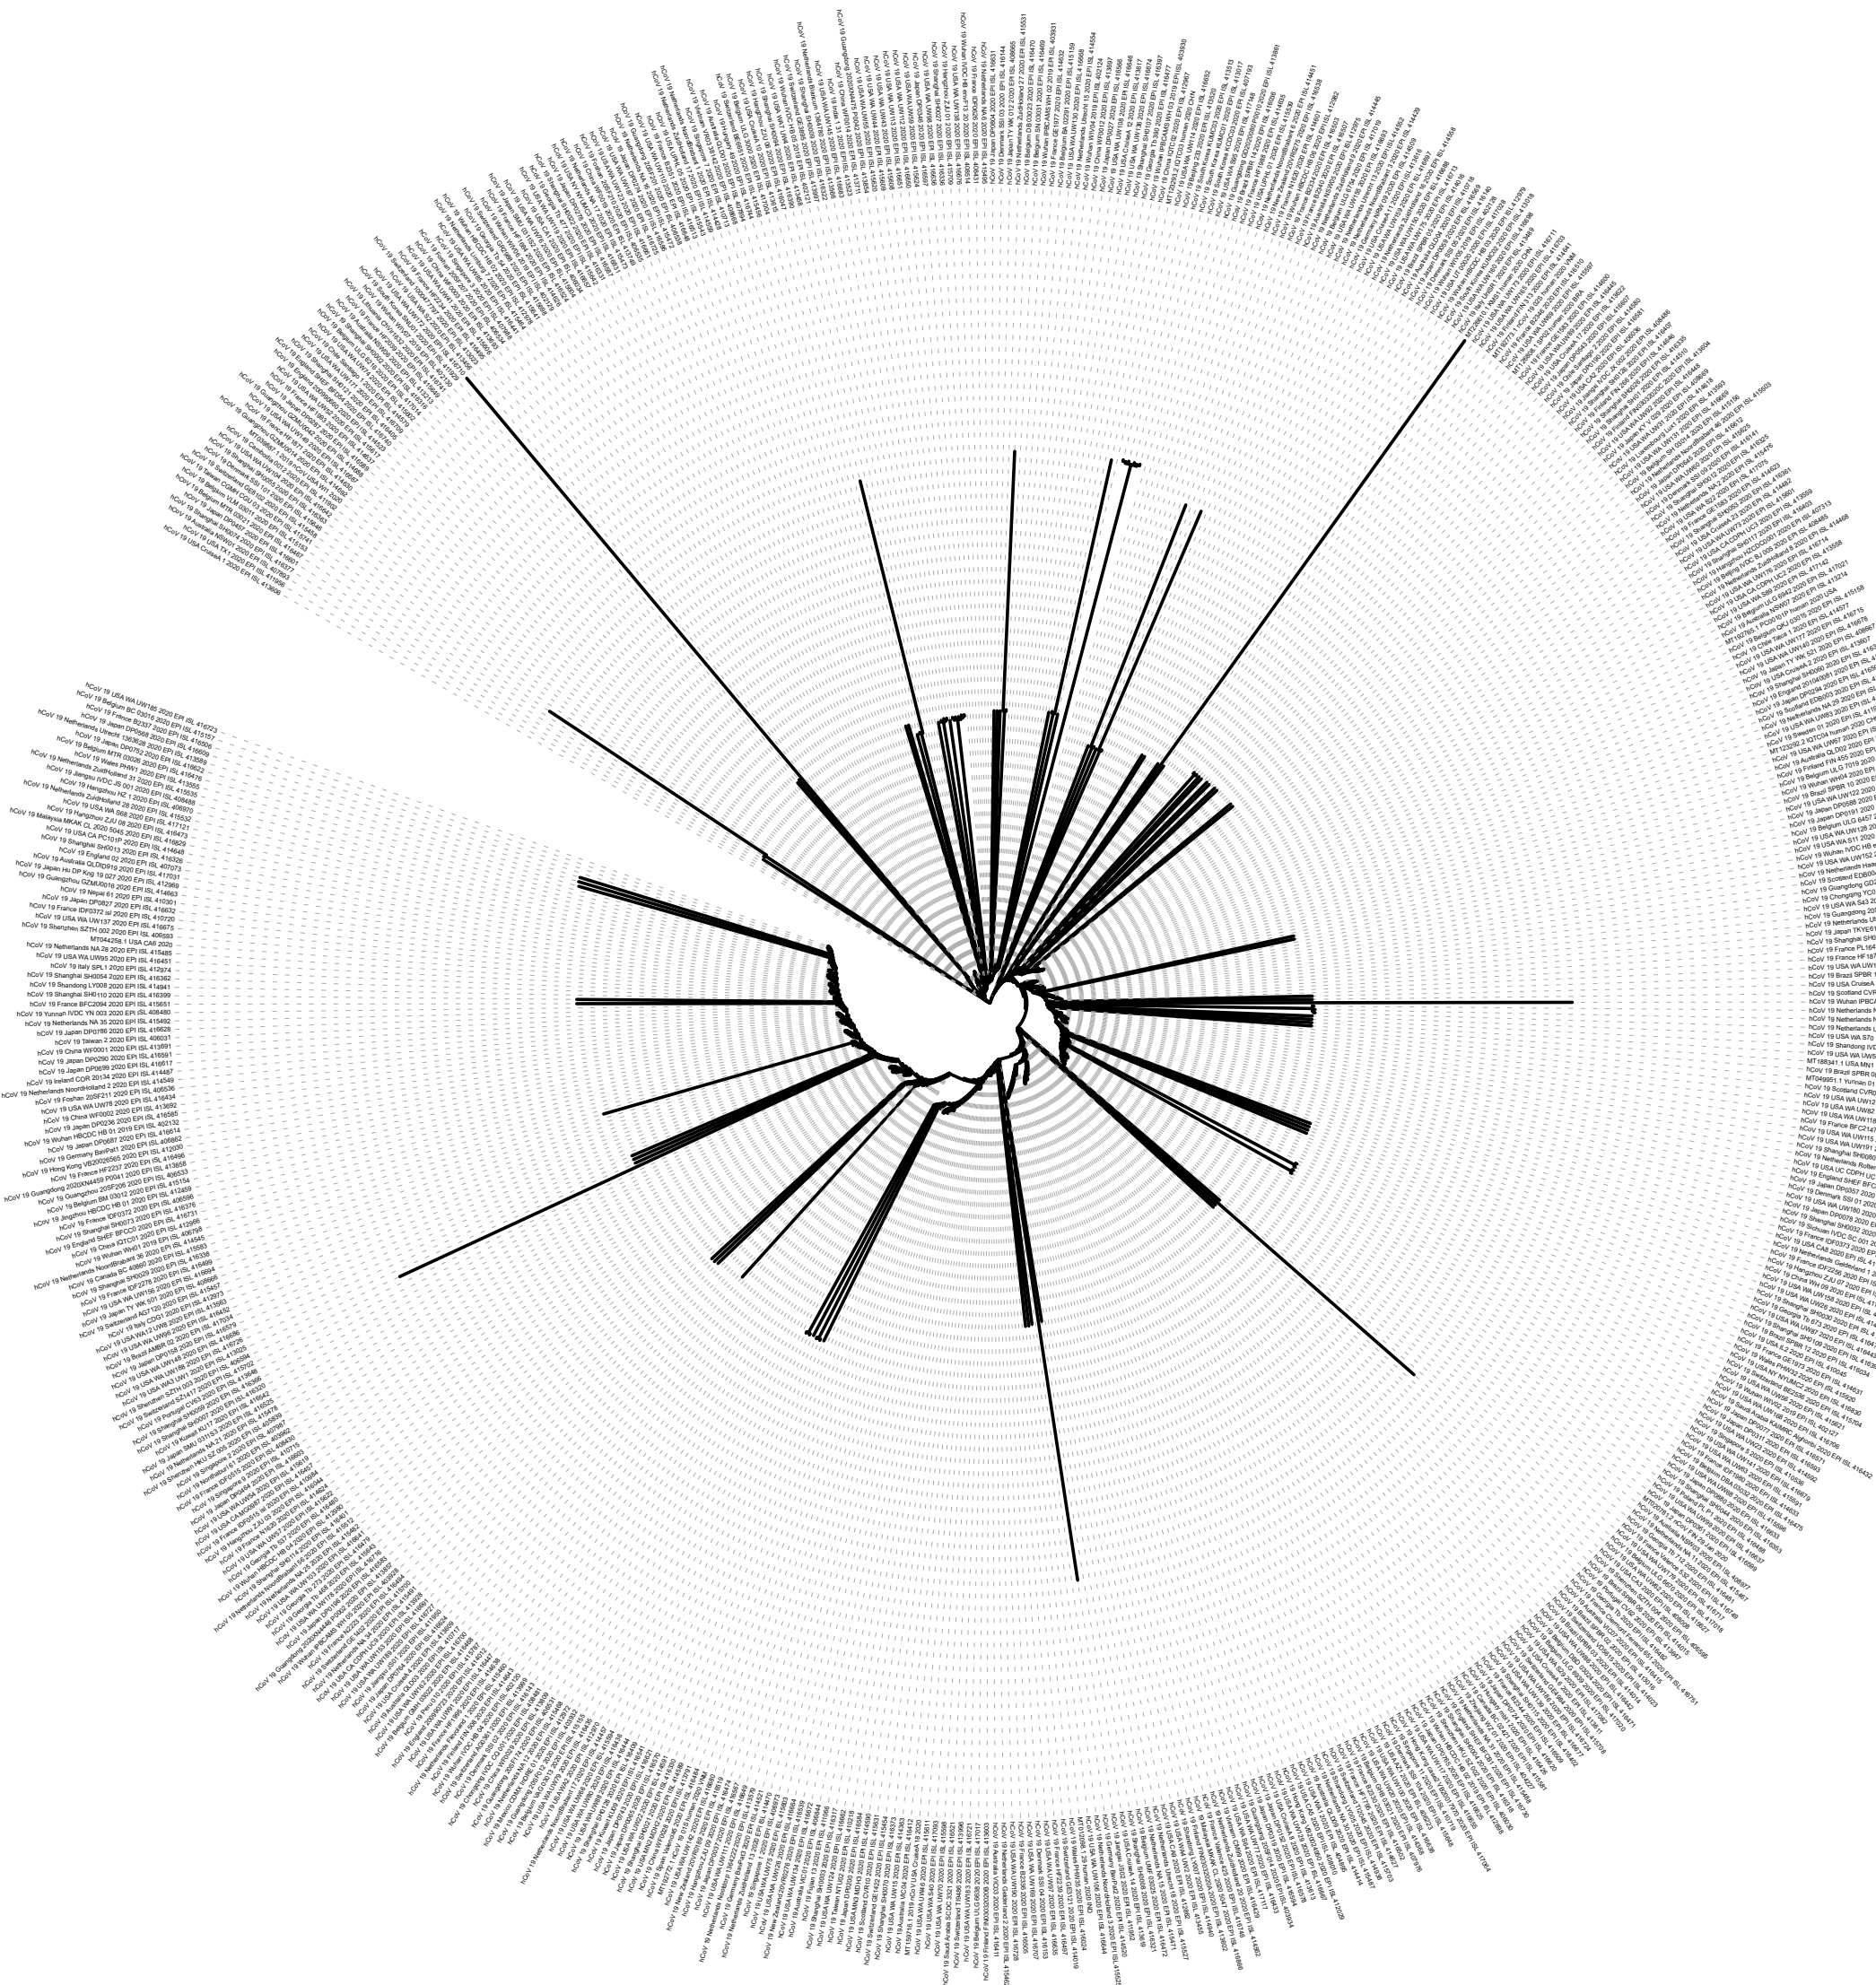

c)

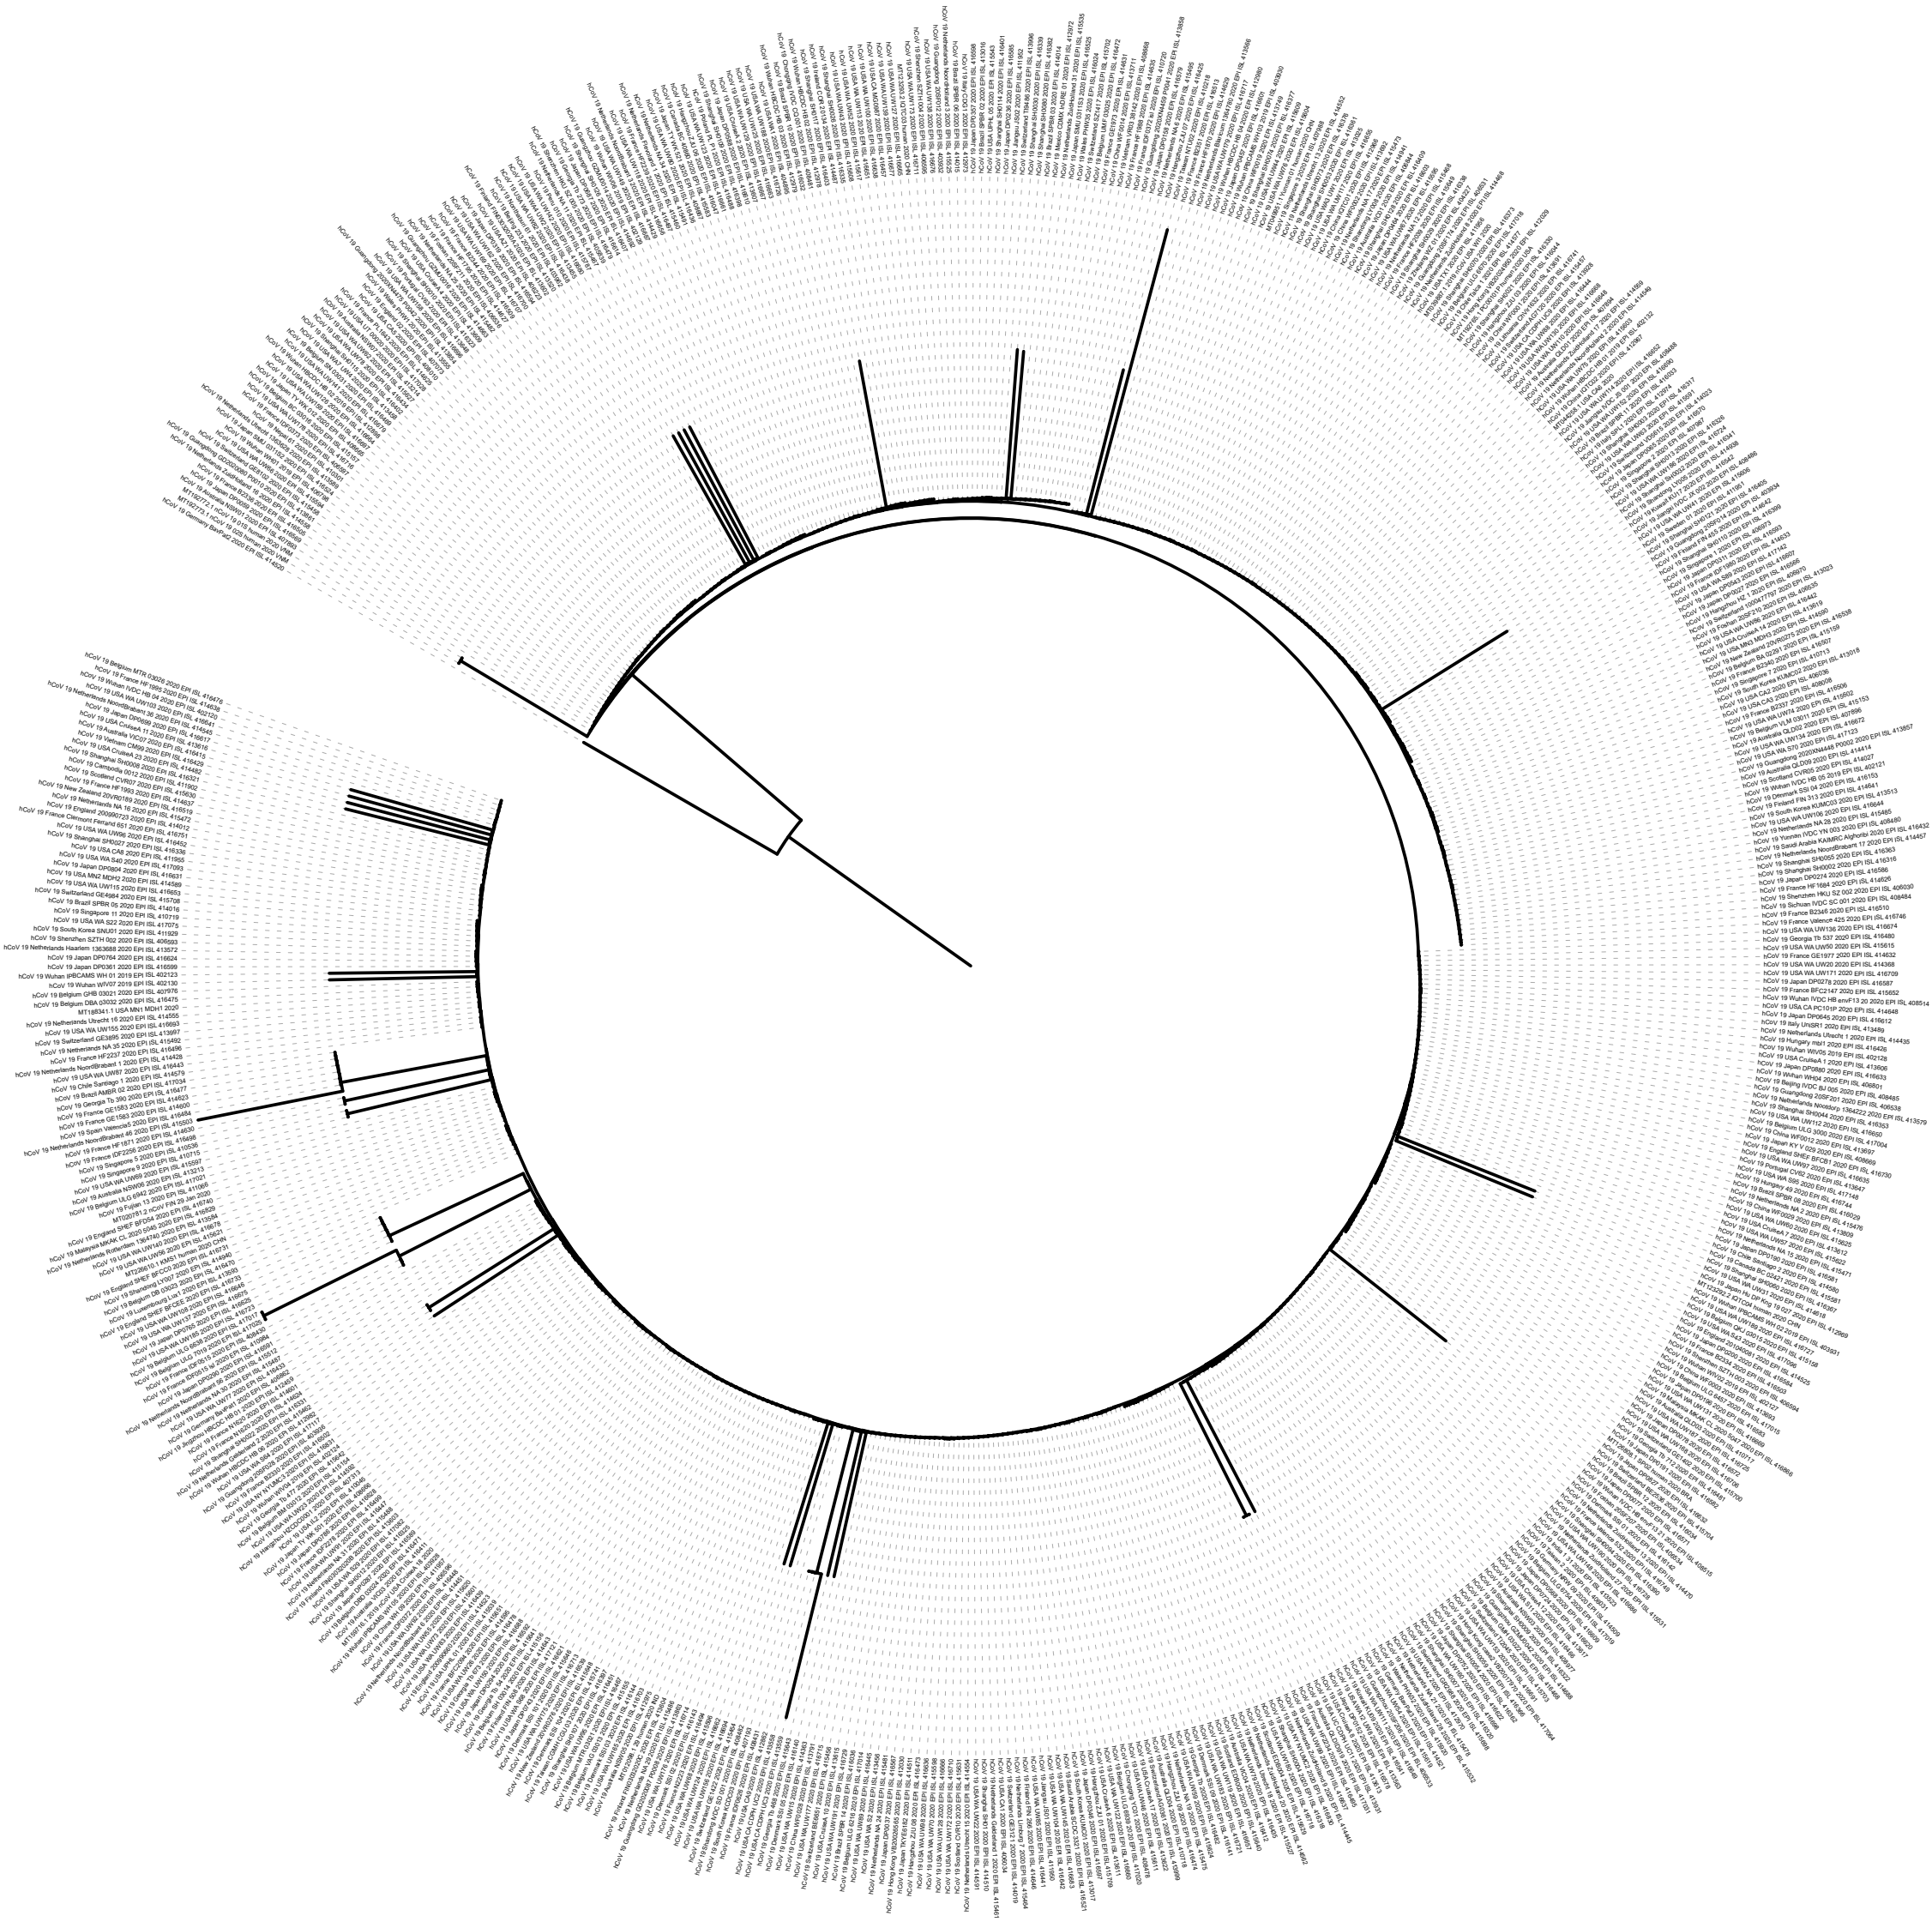

Tree scale: 0.001

d)

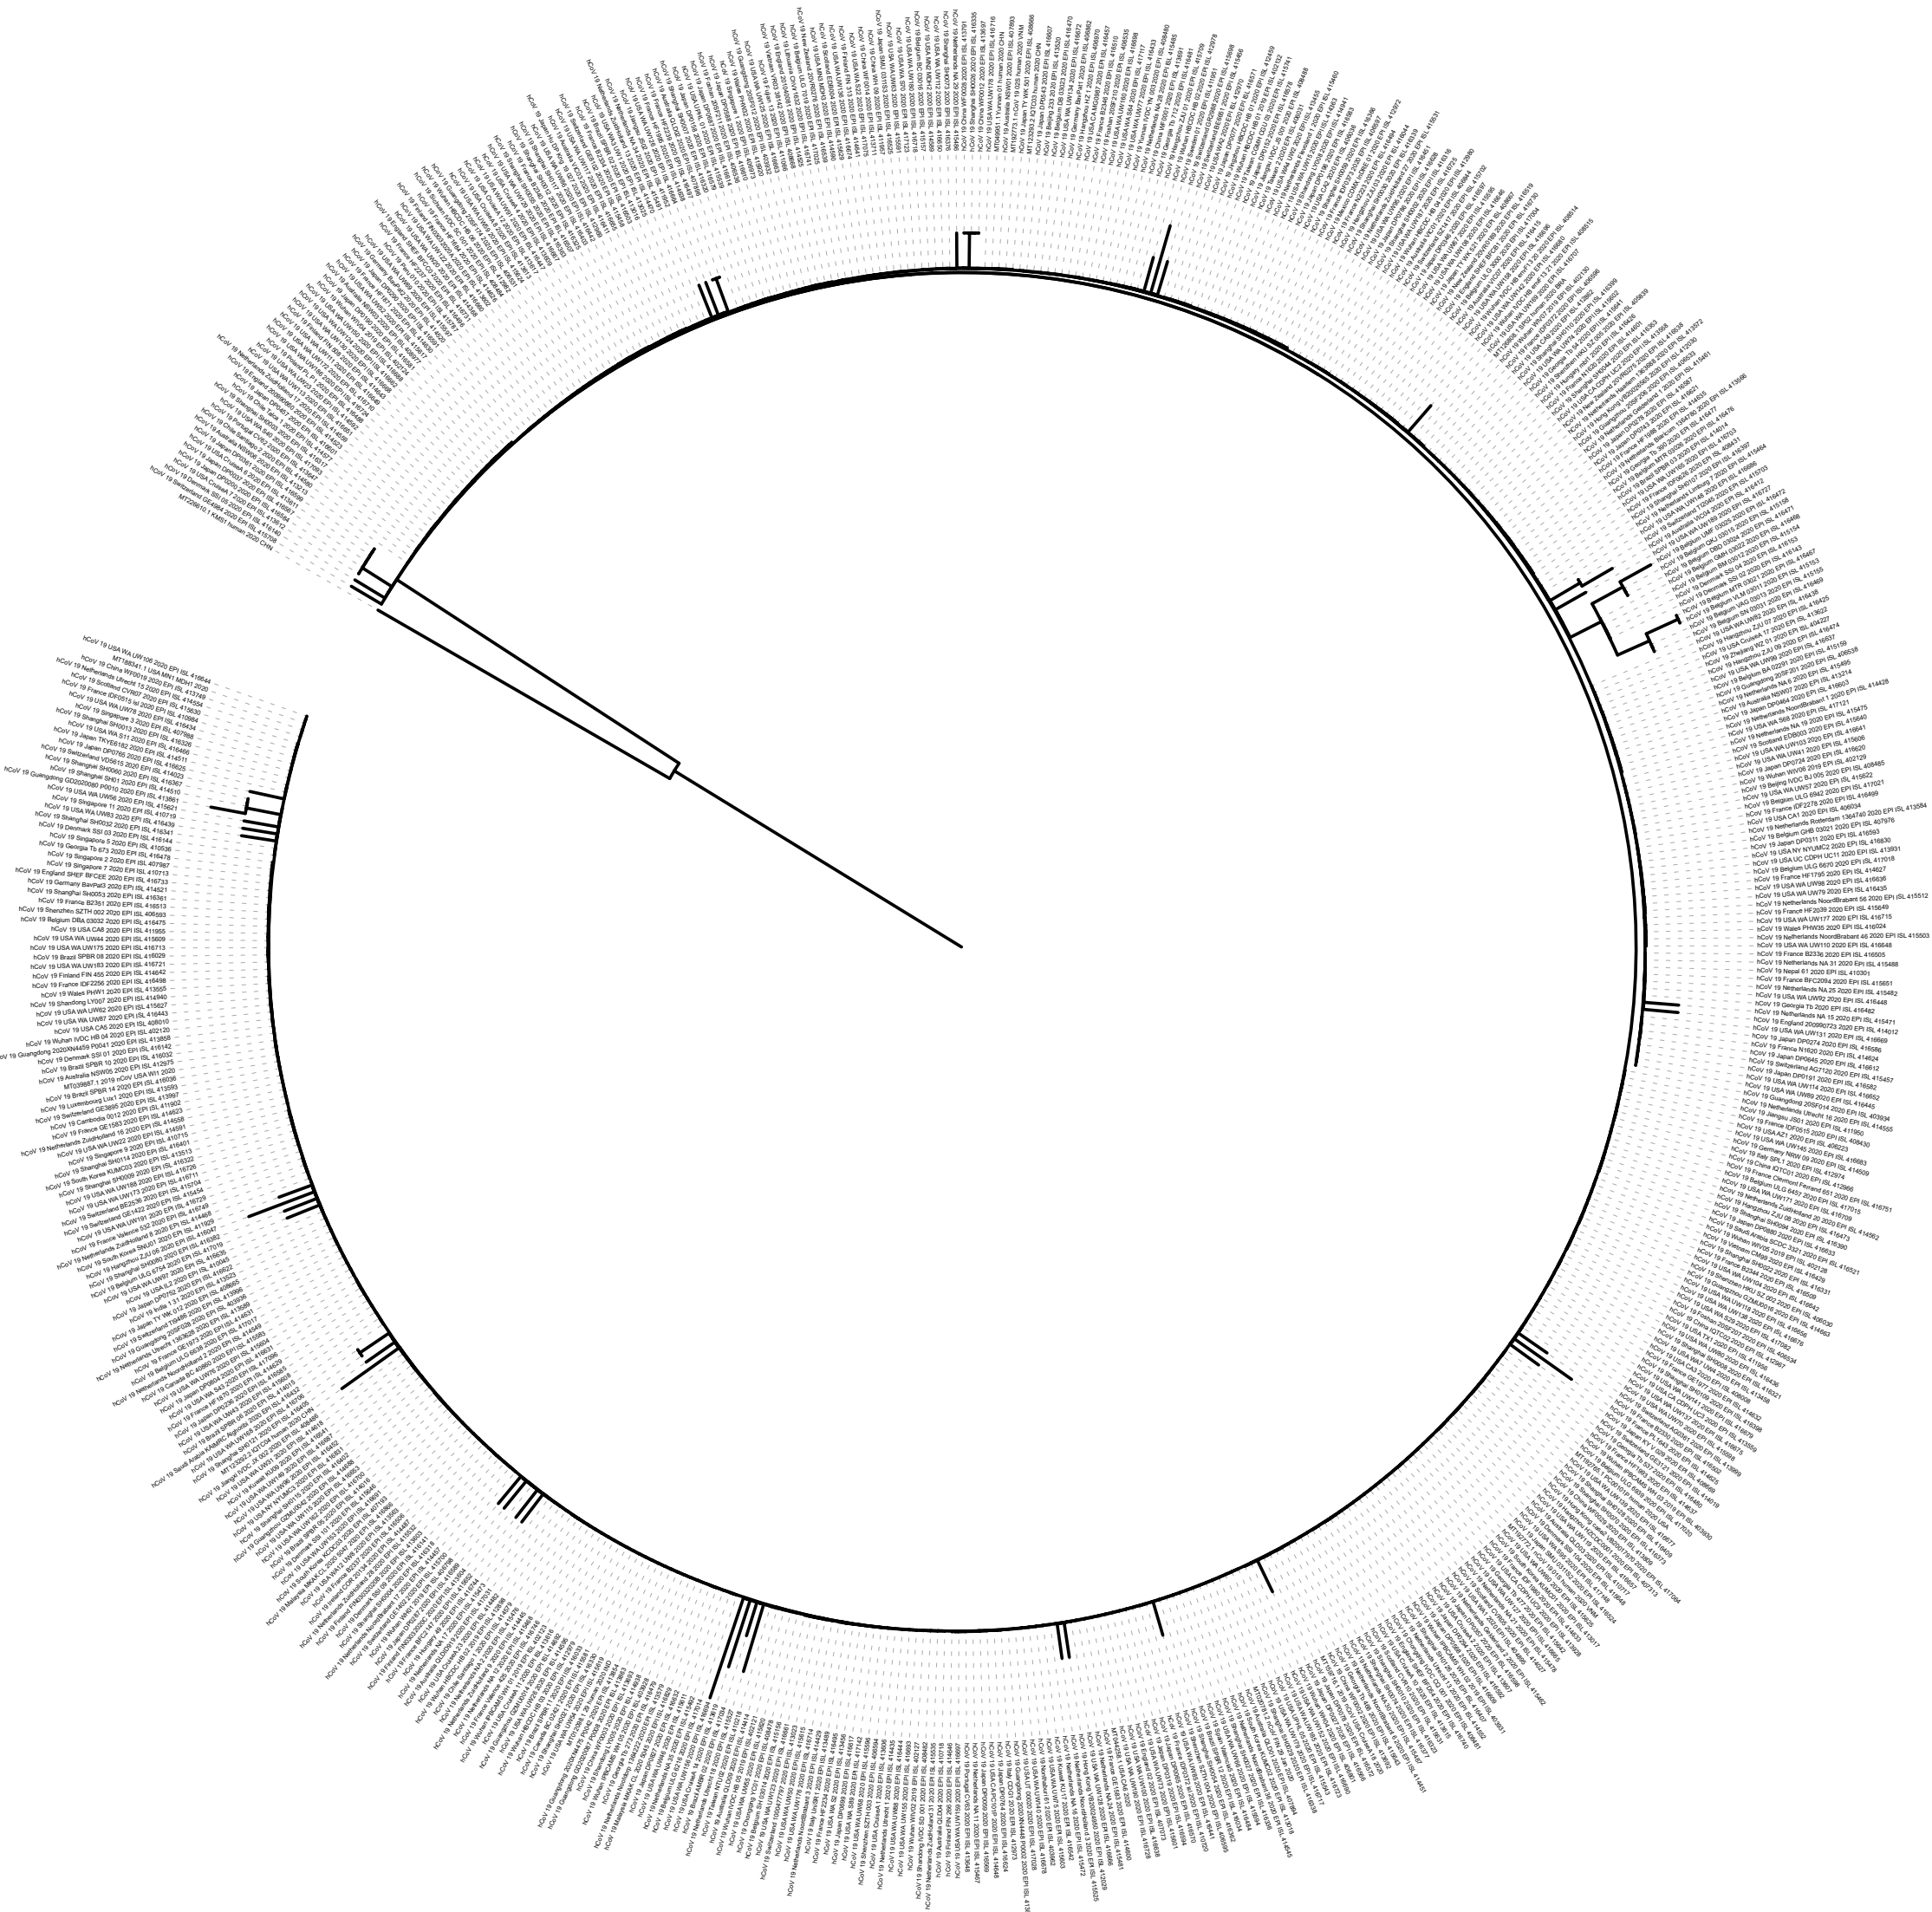

Tree scale: 0.001 



f)

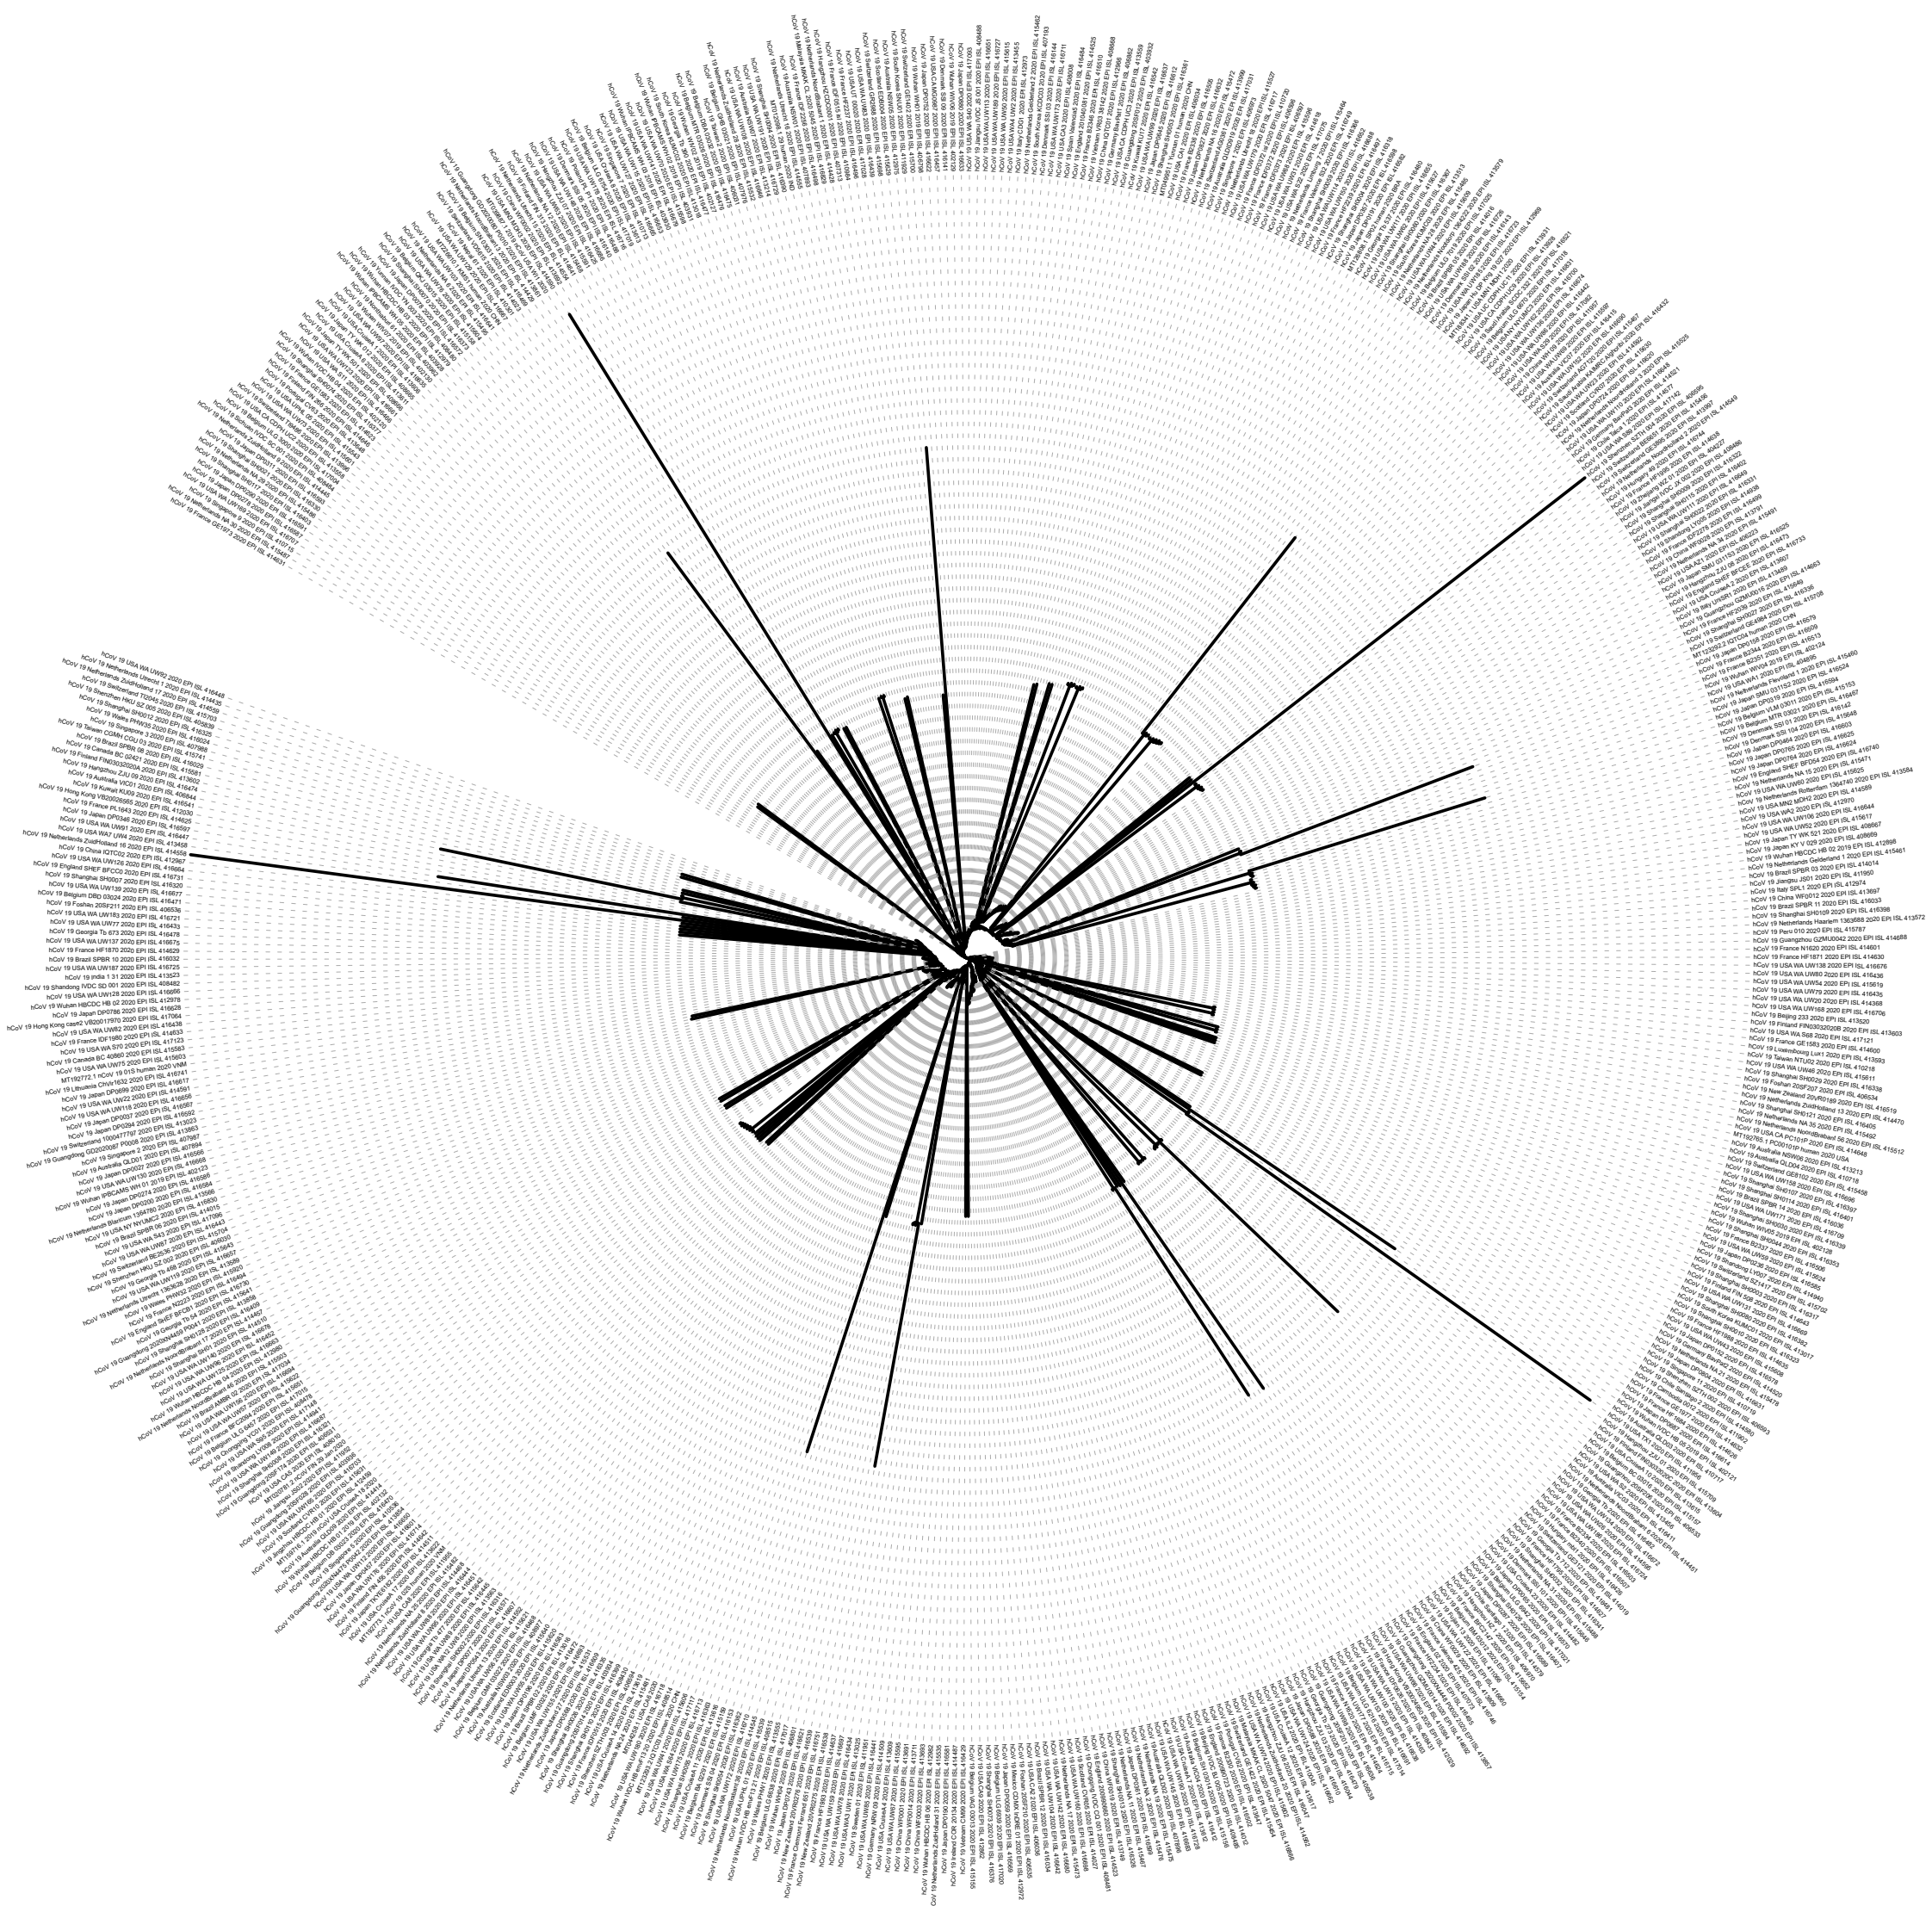

Tree scale: 0.001

g)

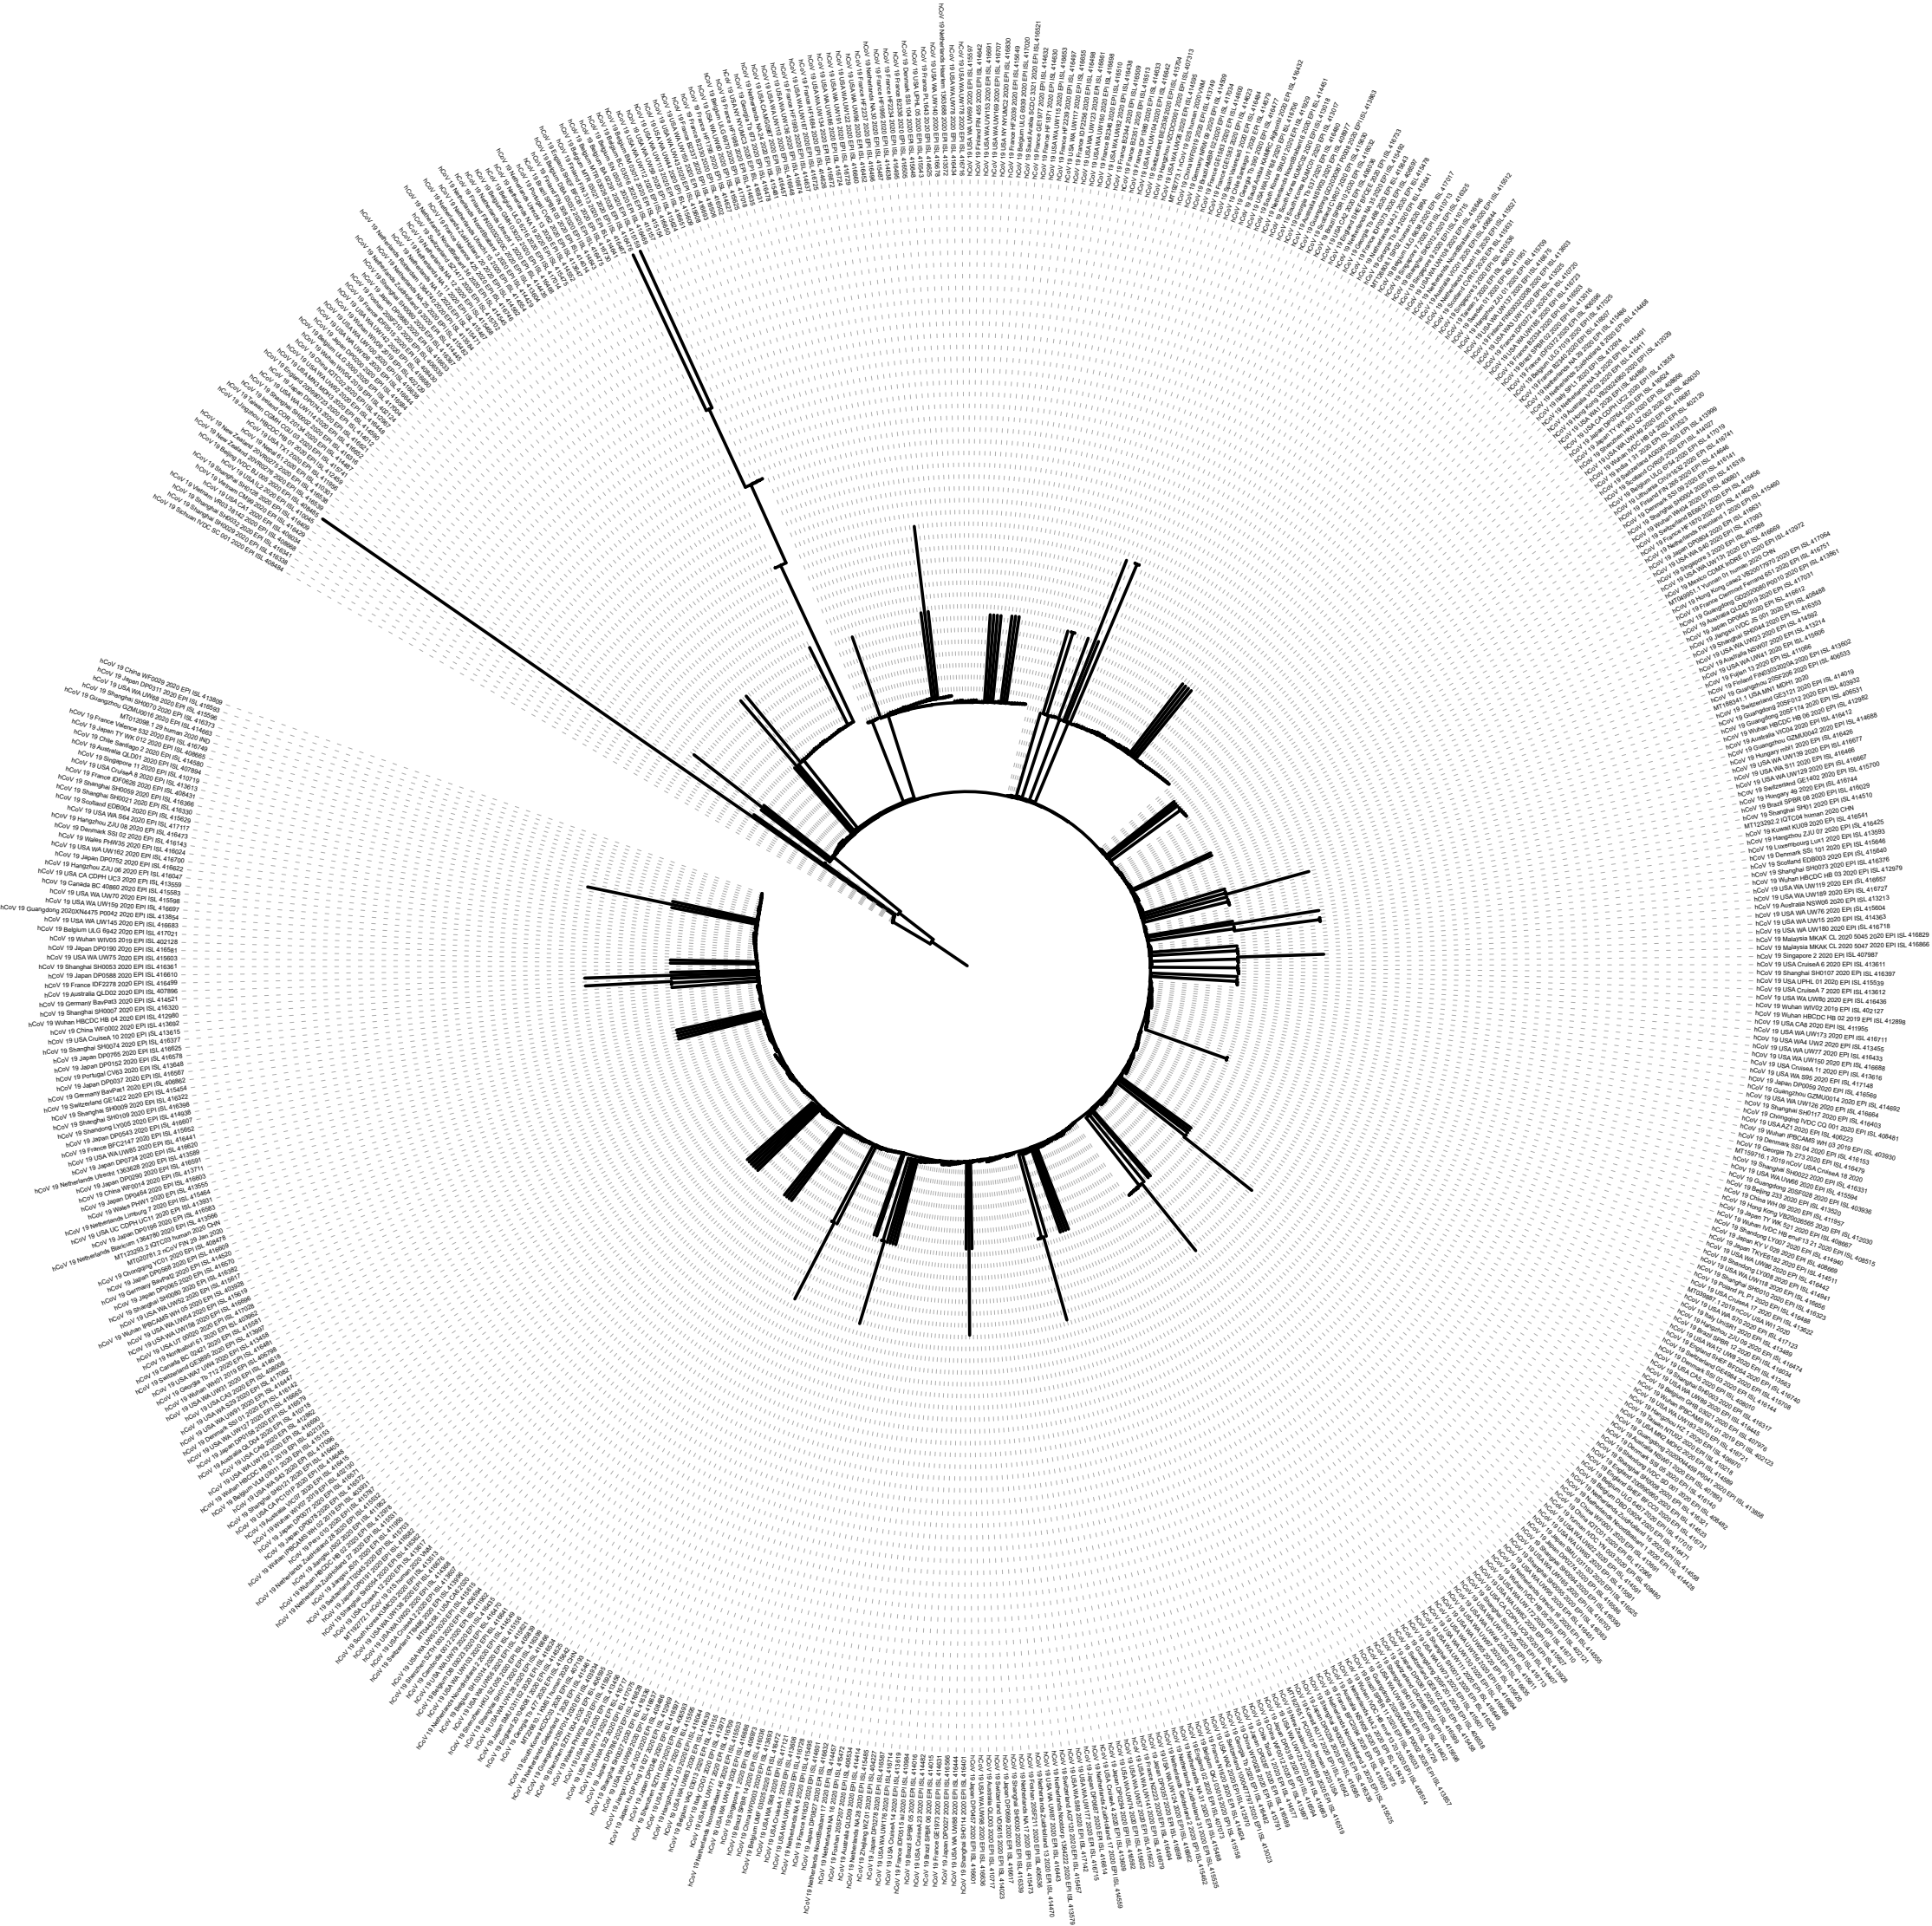

Tree scale: 0.001

h)

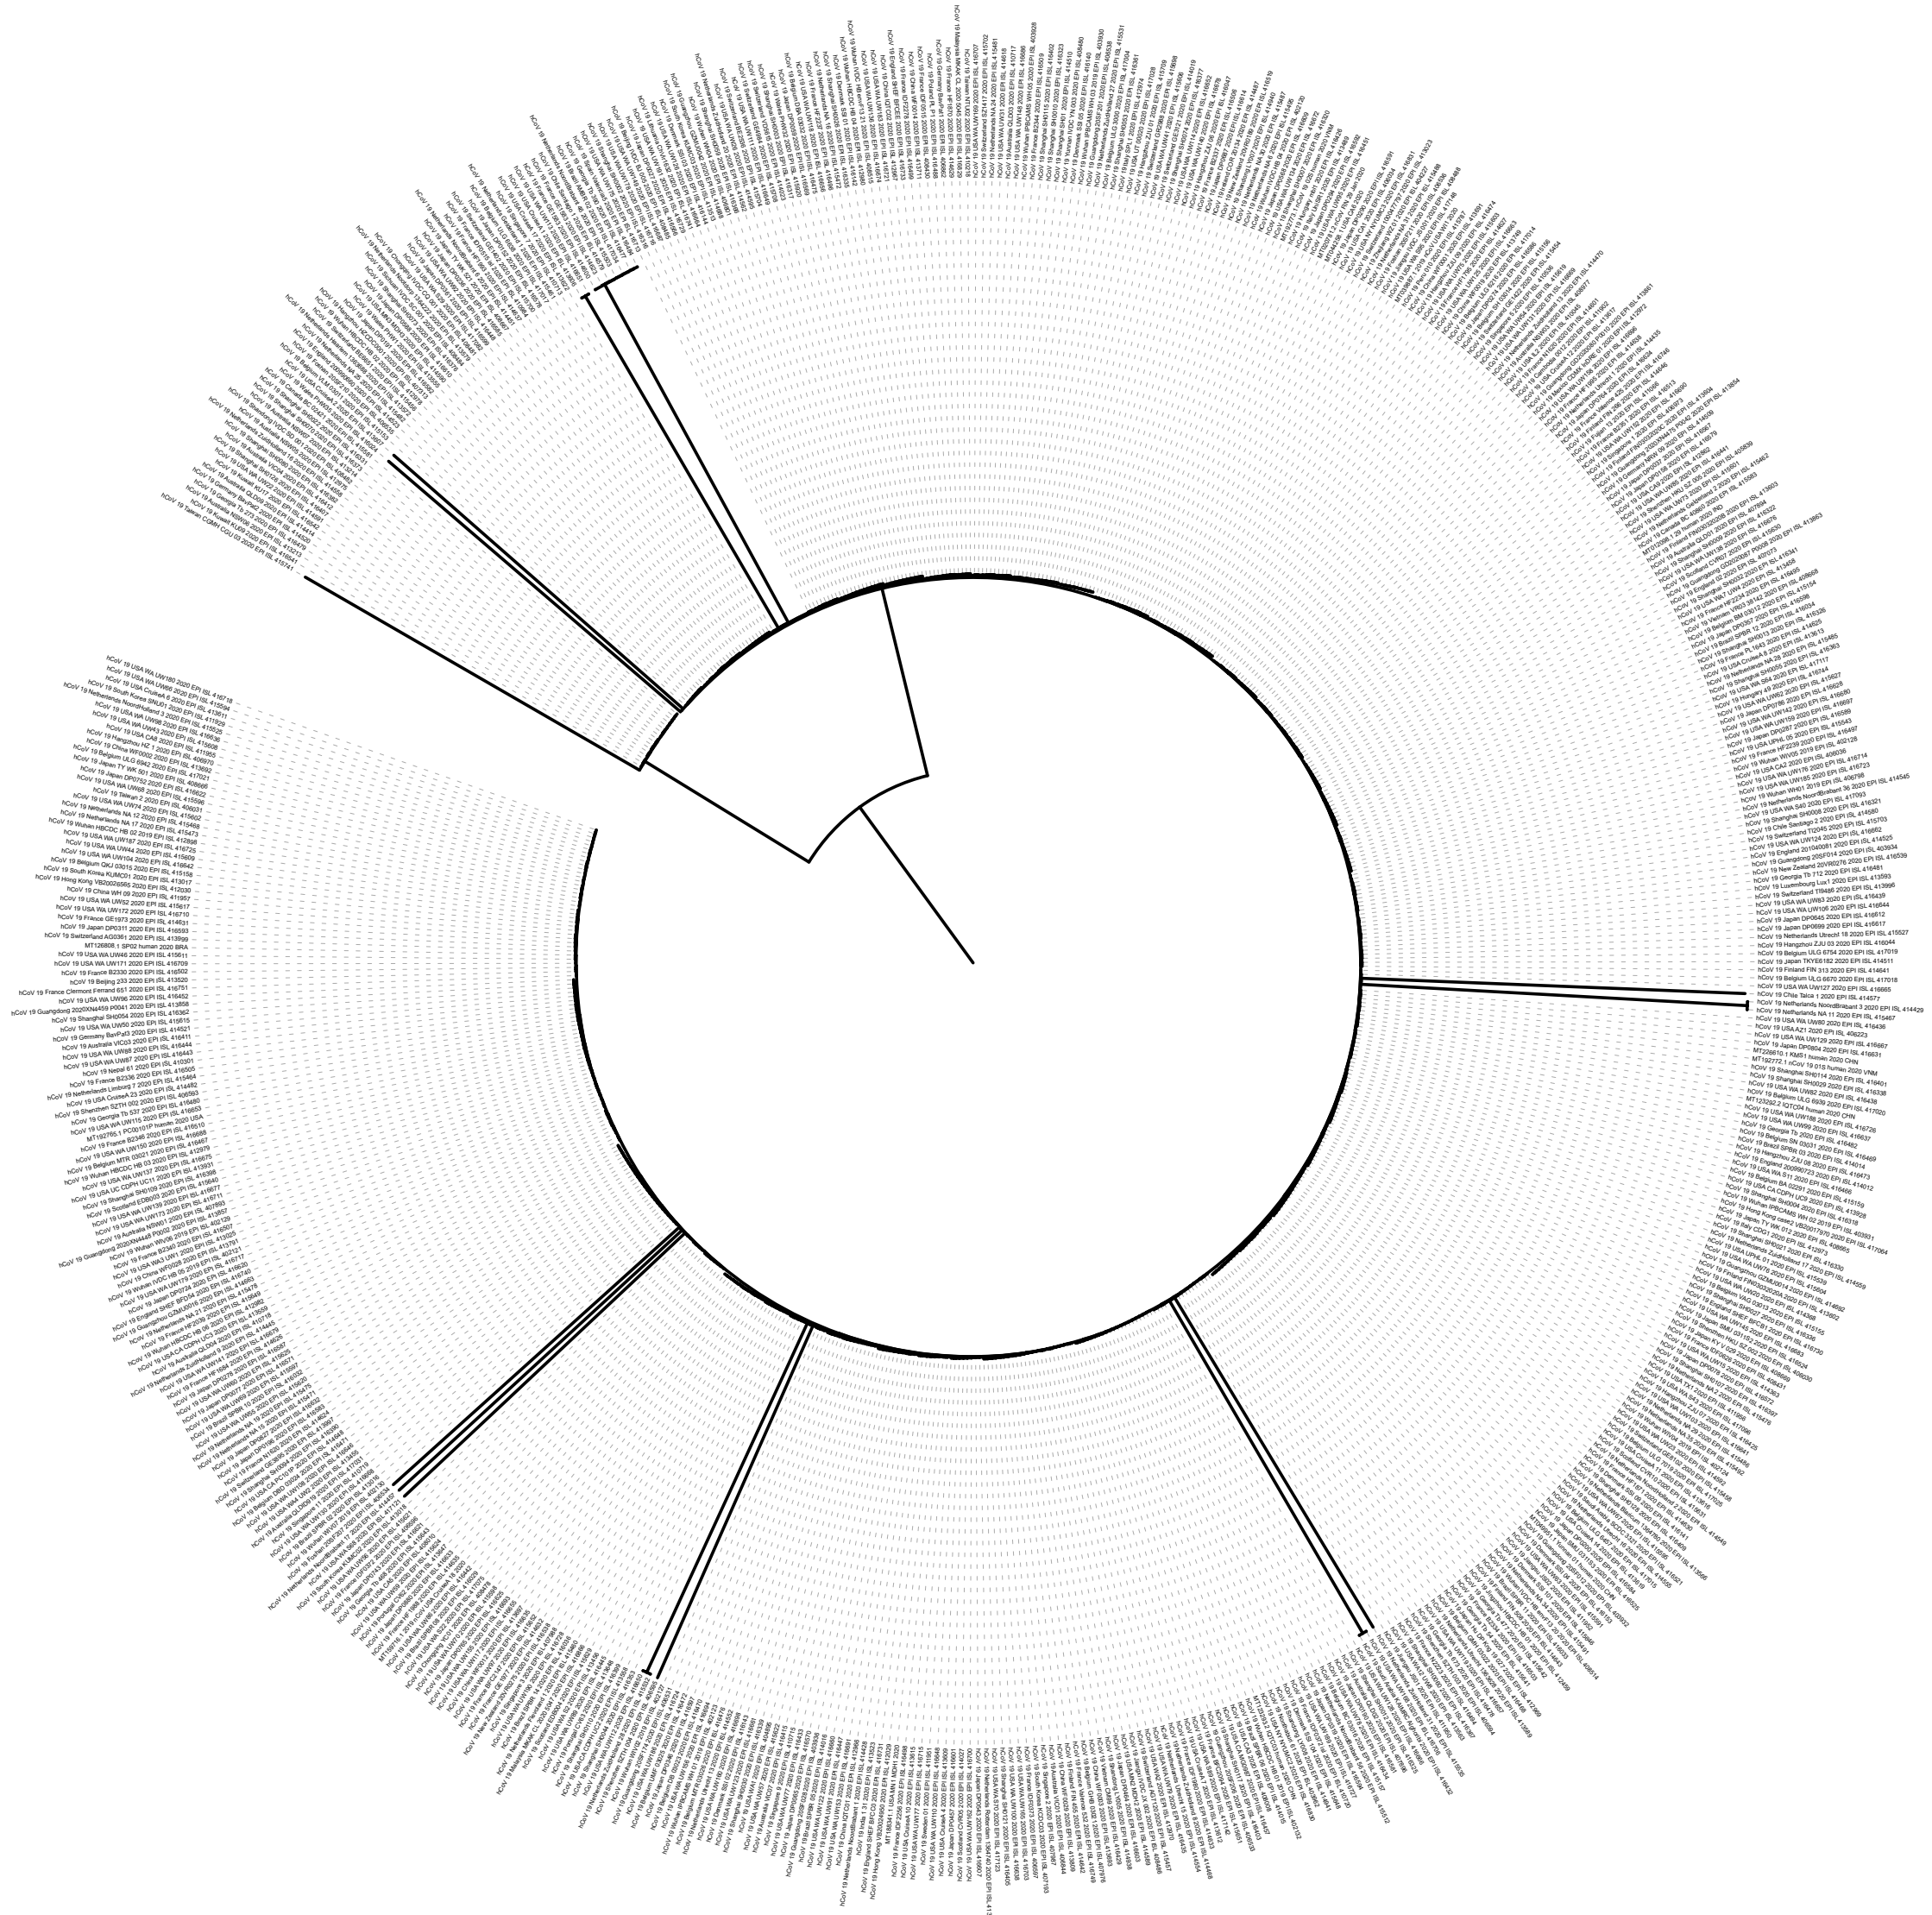

Tree scale: 0.001

i)

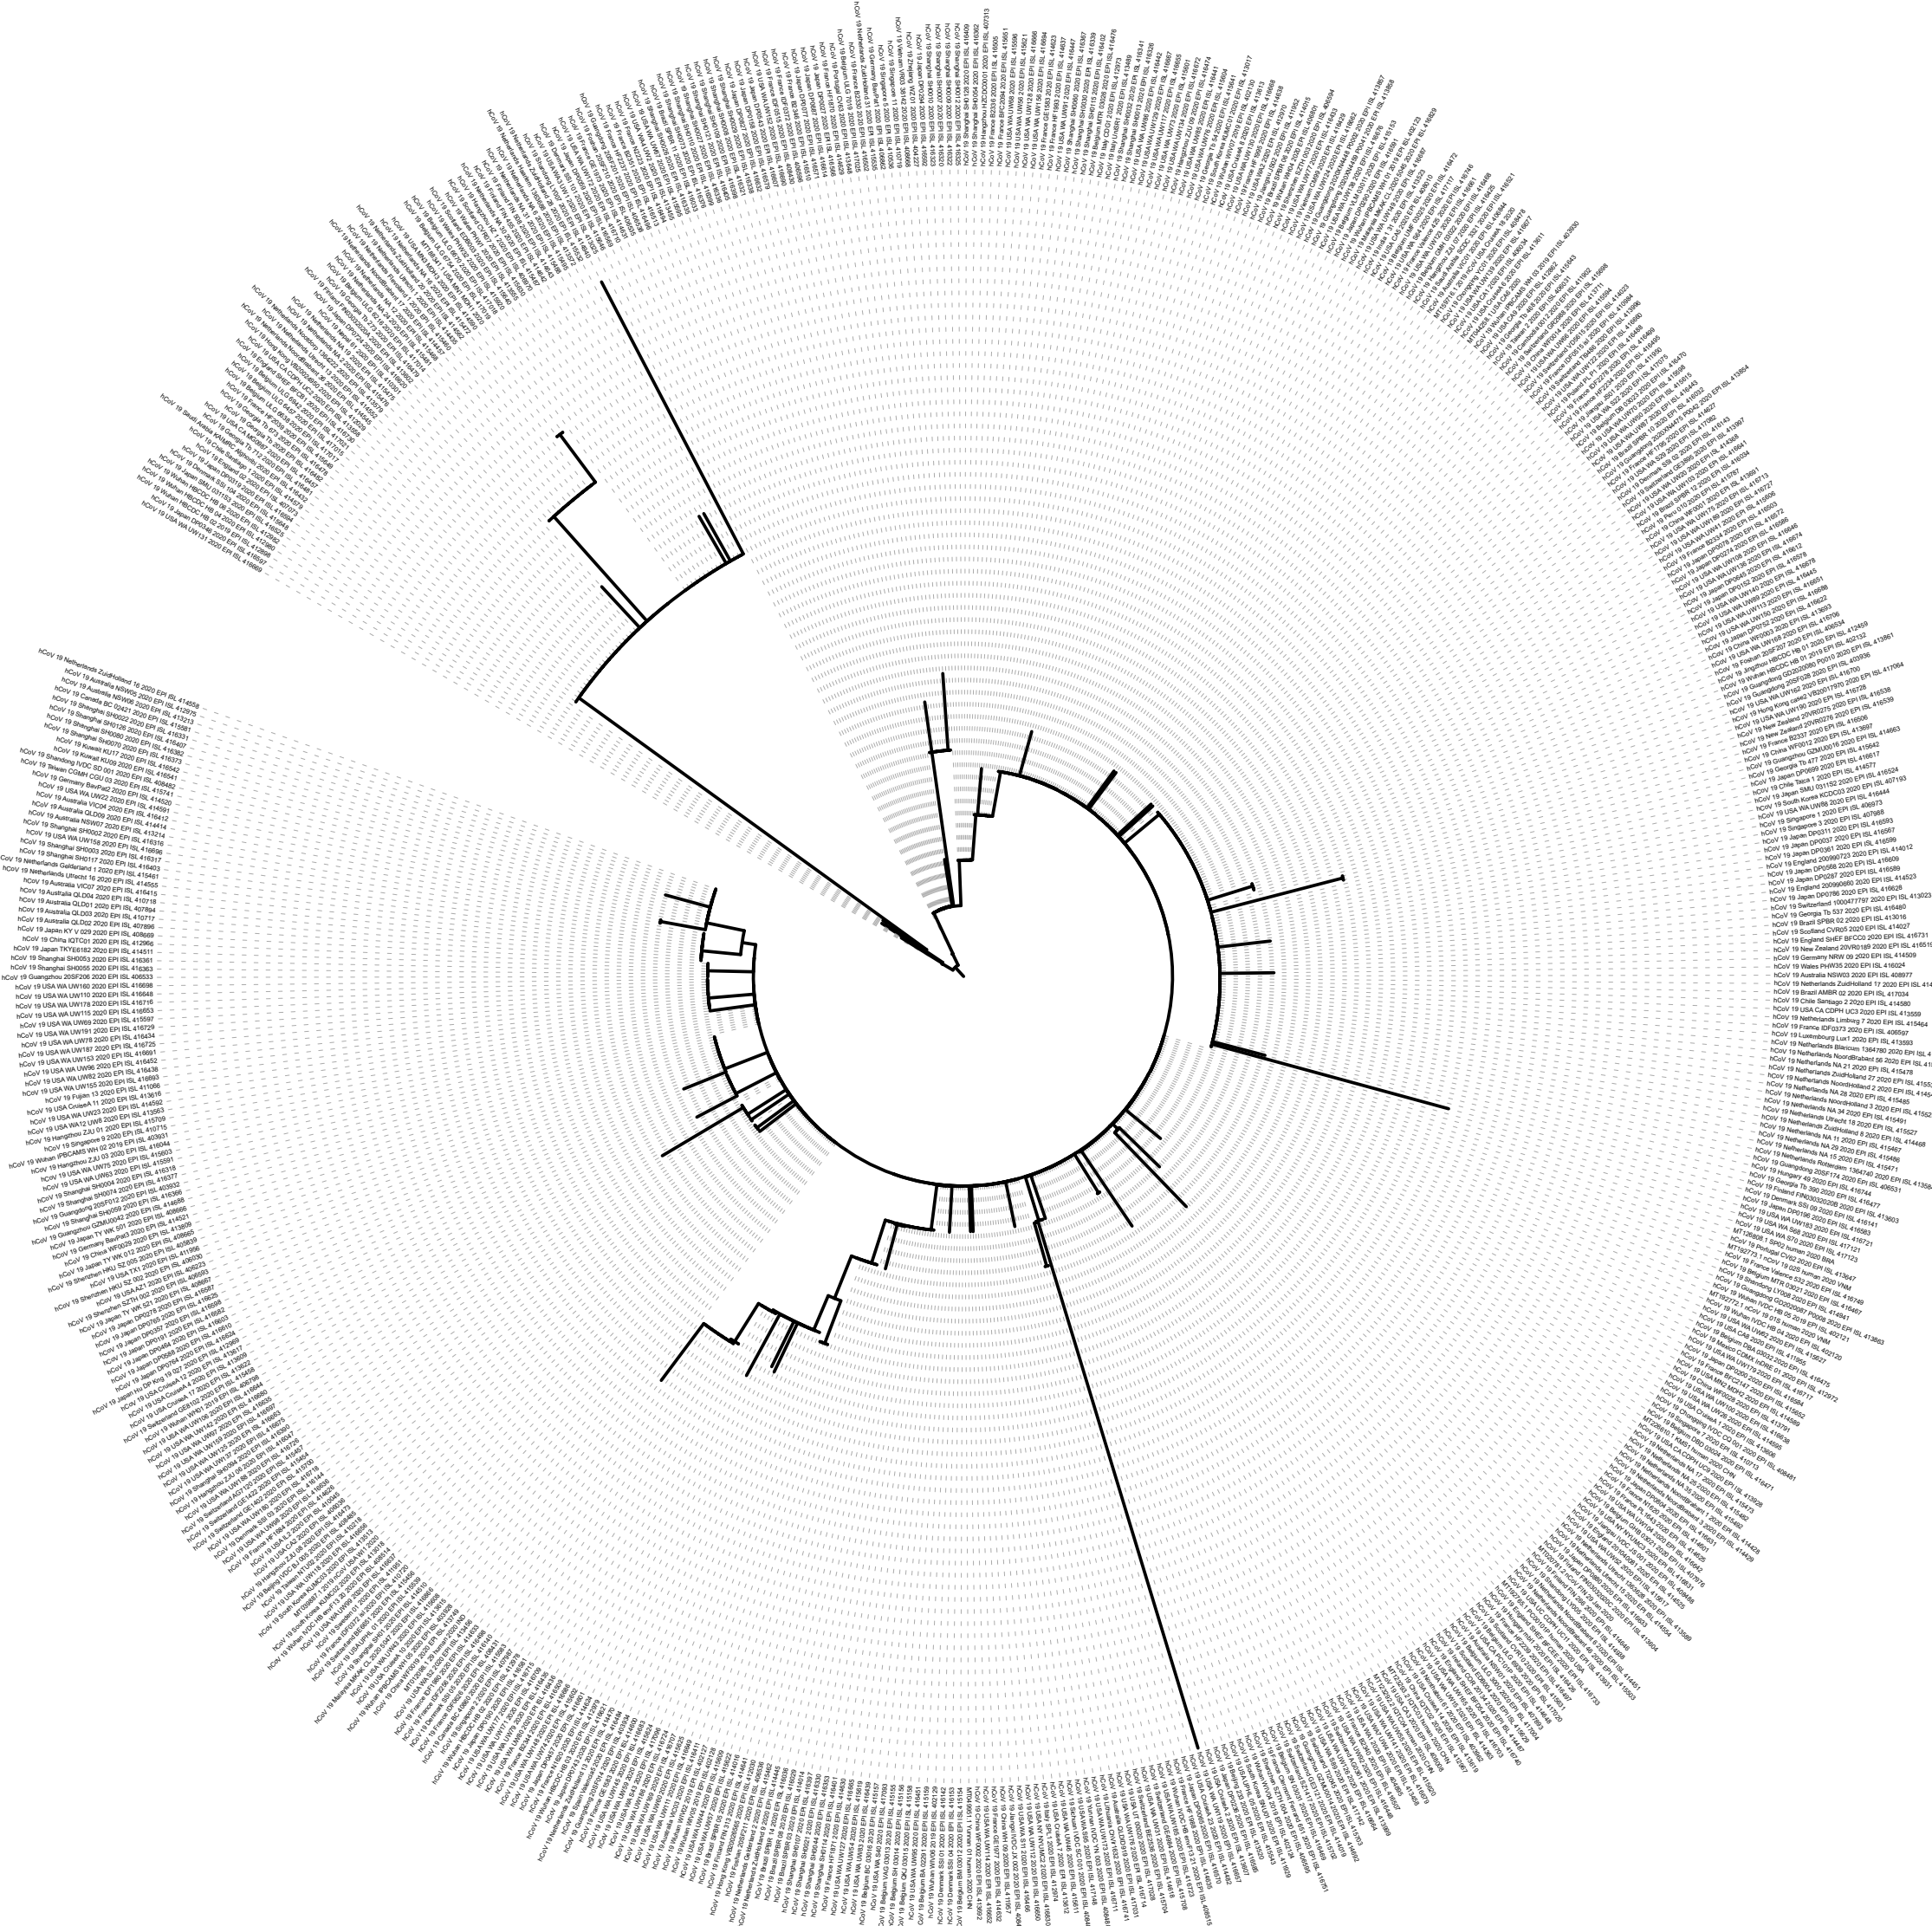

Tree scale: 0.001



a)

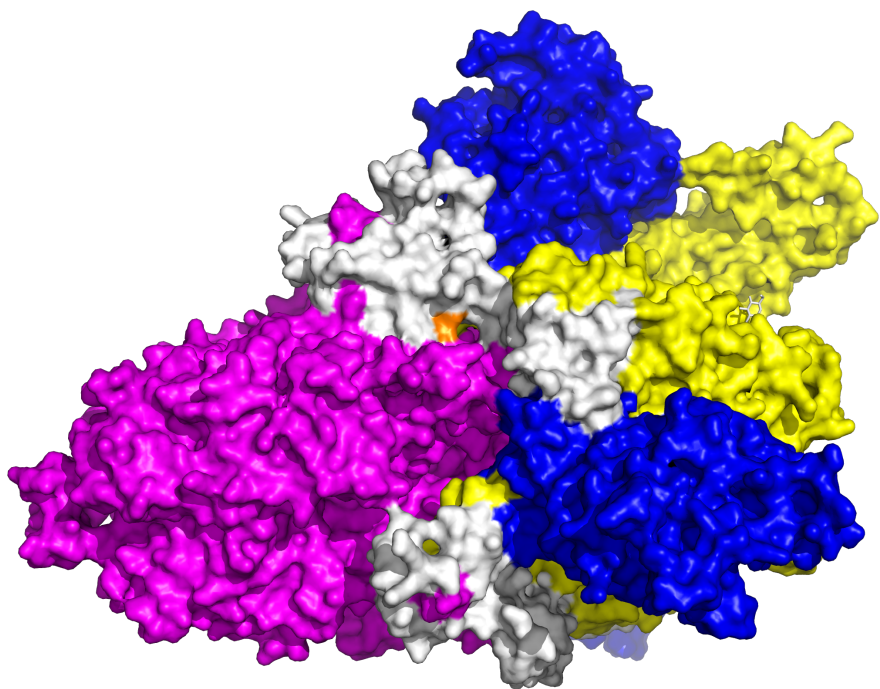

b)

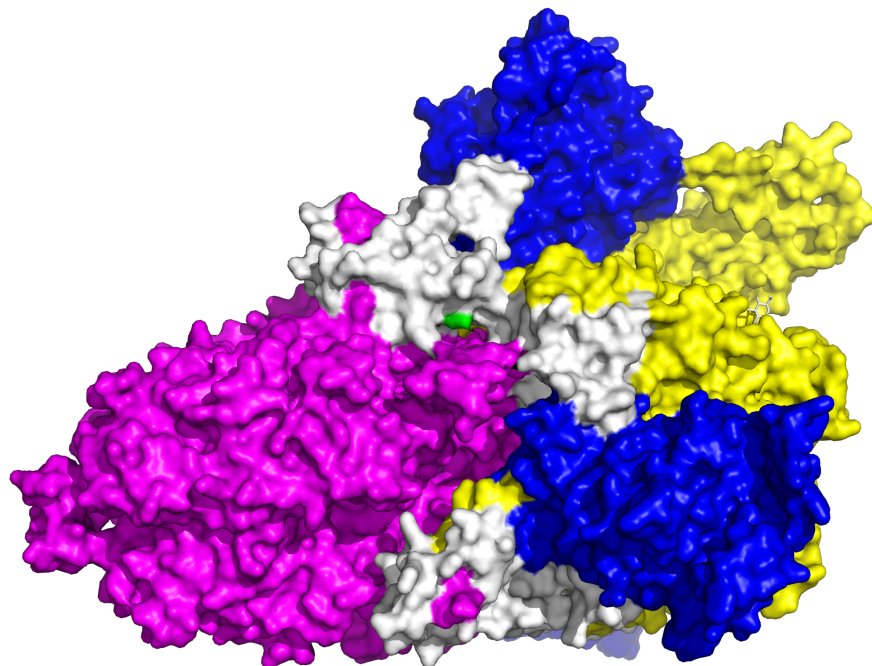

c)

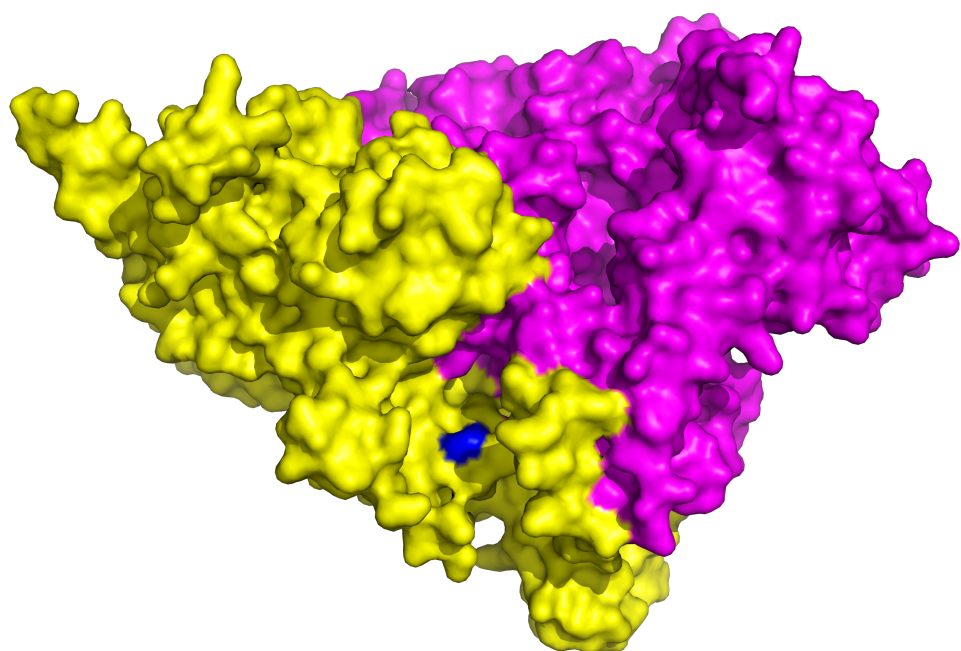

d)

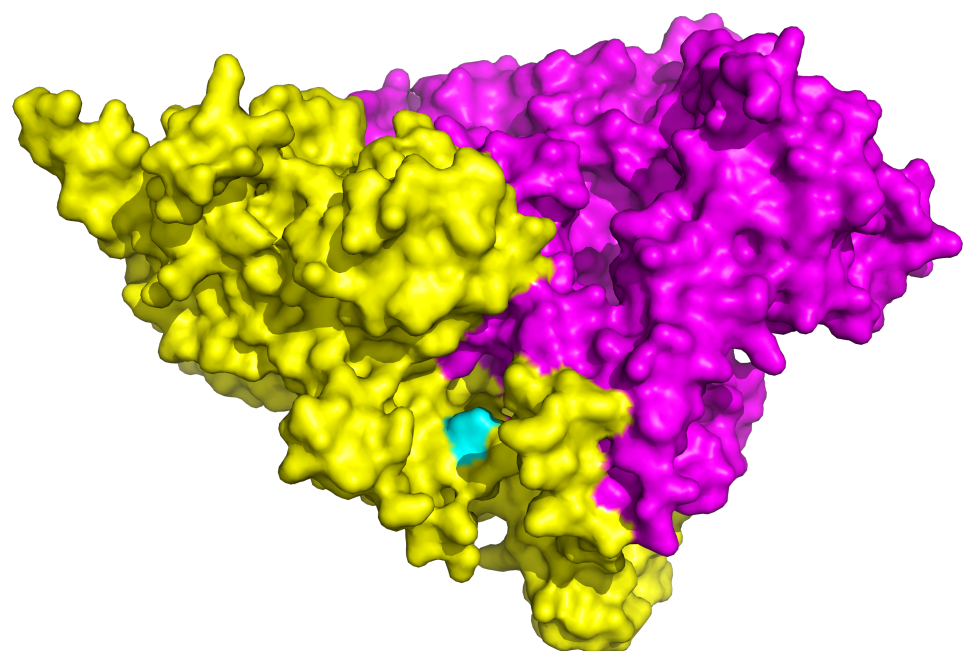

e)

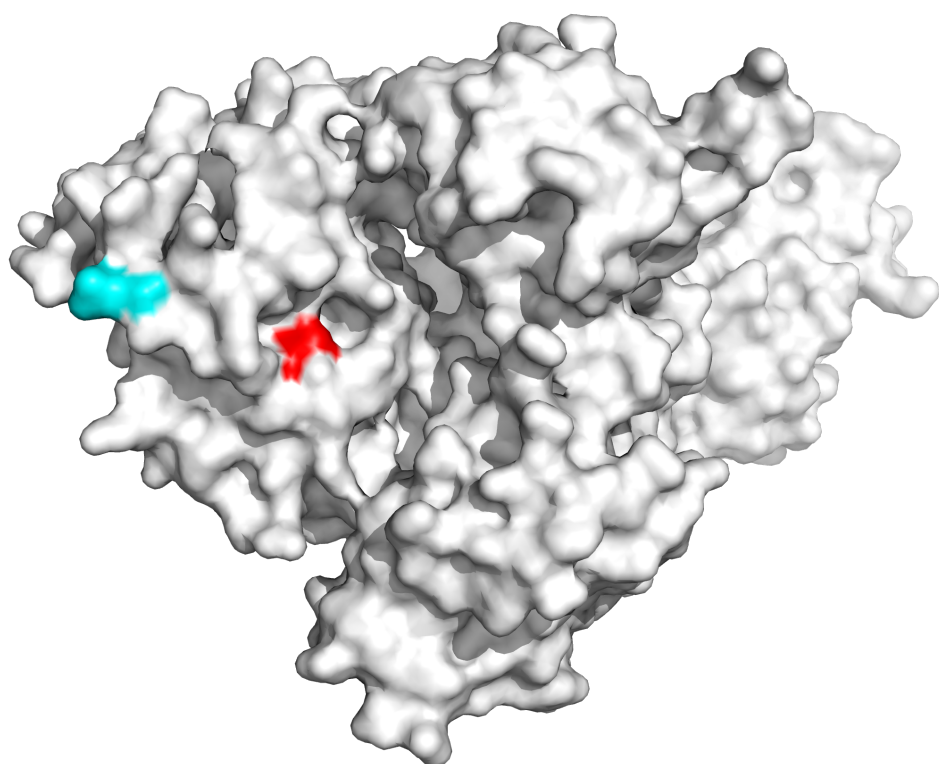

f)

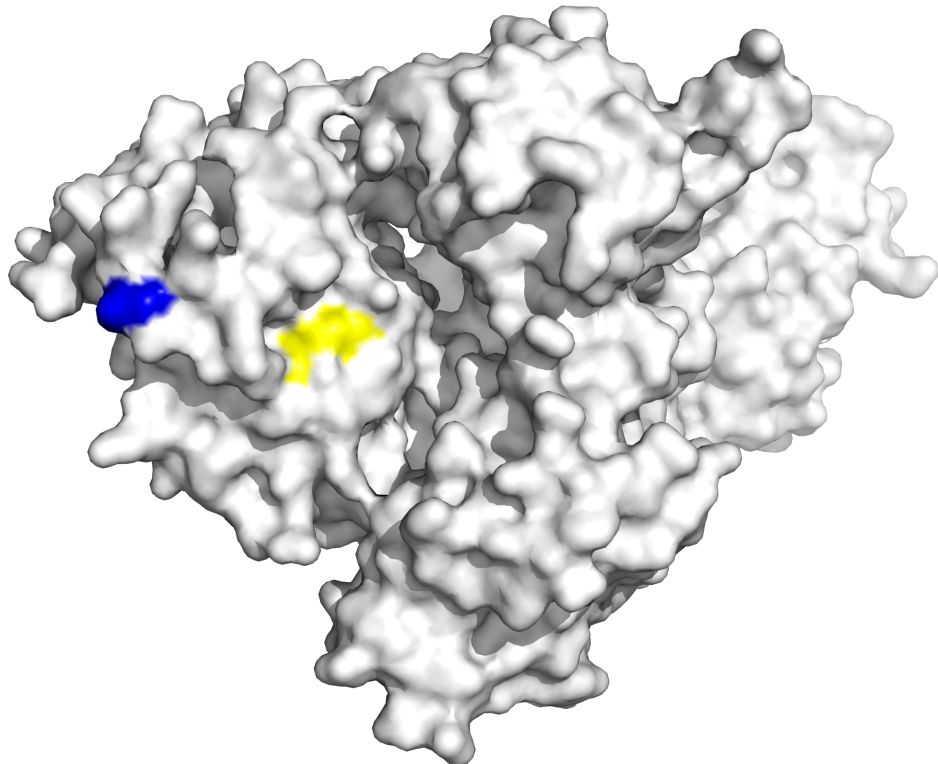

Supplement: Supplementary file [file media-1.pdf]
