# Supplementary material for: The global population of SARS-CoV-2 is composed of six major subtypes
Source: bioRxiv or medRxiv preprint supplement (doi:10.1101/2020.04.14.040782), 2020-04-20
Supplement: Supplementary file [file media-2.pdf]

| Haplotype <sup>1</sup> | Accession ID   | Virus name                       | Host                | Location                     | Collection date | Originating lab                                                                                   | Submitting lab                                                                                                                                                                                                             | Authors                                                                                                                                                                                                                                                                                                            |
|------------------------|----------------|----------------------------------|---------------------|------------------------------|-----------------|---------------------------------------------------------------------------------------------------|----------------------------------------------------------------------------------------------------------------------------------------------------------------------------------------------------------------------------|--------------------------------------------------------------------------------------------------------------------------------------------------------------------------------------------------------------------------------------------------------------------------------------------------------------------|
| 1                      | EPI_ISL_402120 | hCoV-19/Wuhan/IVDC-HB-04/2020    | <i>Homo sapiens</i> | Asia / China / Hubei / Wuhan | 2020-01-01      | National Institute for Viral Disease Control and Prevention, China CDC                            | National Institute for Viral Disease Control and Prevention, China CDC                                                                                                                                                     | Wenjie Tan, Xiang Zhao, Wenling Wang, Xuejun Ma, Yongzhong Jiang, Roujian Lu, Ji Wang, Weimin Zhou, Peihua Niu, Peipei Liu, Faxian Zhan, Weifeng Shi, Baoying Huang, Jun Liu, Li Zhao, Yao Meng, Xiaozhou He, Fei Ye, Na Zhu, Yang Li, Jing Chen, Wenbo Xu, George F. Gao, Guizhen Wu                              |
| 2                      | EPI_ISL_402121 | hCoV-19/Wuhan/IVDC-HB-05/2019    | <i>Homo sapiens</i> | Asia / China / Hubei / Wuhan | 2019-12-30      | National Institute for Viral Disease Control and Prevention, China CDC                            | National Institute for Viral Disease Control and Prevention, China CDC                                                                                                                                                     | Wenjie Tan, Xuejun Ma, Xiang Zhao, Wenling Wang, Yongzhong Jiang, Roujian Lu, Ji Wang, Peihua Niu, Weimin Zhou, Faxian Zhan, Weifeng Shi, Baoying Huang, Jun Liu, Li Zhao, Yao Meng, Fei Ye, Na Zhu, Xiaozhou He, Peipei Liu, Yang Li, Jing Chen, Wenbo Xu, George F. Gao, Guizhen Wu                              |
| 3                      | EPI_ISL_402123 | hCoV-19/Wuhan/IPBCAMS-WH-01/2019 | <i>Homo sapiens</i> | Asia / China / Hubei / Wuhan | 2019-12-24      | Institute of Pathogen Biology, Chinese Academy of Medical Sciences & Peking Union Medical College | Institute of Pathogen Biology, Chinese Academy of Medical Sciences & Peking Union Medical College                                                                                                                          | Lili Ren, Jianwei Wang, Qi Jin, Zichun Xiang, Zhiqiang Wu, Chao Wu, Yiwei Liu                                                                                                                                                                                                                                      |
| 4                      | EPI_ISL_402124 | hCoV-19/Wuhan/WIV04/2019         | <i>Homo sapiens</i> | Asia / China / Hubei / Wuhan | 2019-12-30      | Wuhan Jinyintan Hospital                                                                          | Wuhan Institute of Virology, Chinese Academy of Sciences                                                                                                                                                                   | Peng Zhou, Xing-Lou Yang, Ding-Yu Zhang, Lei Zhang, Yan Zhu, Hao-Rui Si, Zhengli Shi                                                                                                                                                                                                                               |
| 4                      | EPI_ISL_402125 | hCoV-19/Wuhan-Hu-1/2019          | <i>Homo sapiens</i> | Asia / China                 | 2019-12-31      | unknown                                                                                           | National Institute for Communicable Disease Control and Prevention (ICDC) Chinese Center for Disease Control and Prevention (China CDC)                                                                                    | Zhang,Y.-Z., Wu,F., Chen,Y.-M., Pei,Y.-Y., Xu,L., Wang,W., Zhao,S., Yu,B., Hu,Y., Tao,Z.-W., Song,Z.-G., Tian,J.-H., Zhang,Y.-L., Liu,Y., Zheng,J.-J., Dai,F.-H., Wang,Q.-M., She,J.-L. and Zhu,T.-Y.                                                                                                              |
| 4                      | EPI_ISL_403929 | hCoV-19/Wuhan/IPBCAMS-WH-04/2019 | <i>Homo sapiens</i> | Asia / China / Hubei / Wuhan | 2019-12-30      | Institute of Pathogen Biology, Chinese Academy of Medical Sciences & Peking Union Medical College | Institute of Pathogen Biology, Chinese Academy of Medical Sciences & Peking Union Medical College                                                                                                                          | Lili Ren, Jianwei Wang, Qi Jin, Zichun Xiang, Zhiqiang Wu, Chao Wu, Yiwei Liu                                                                                                                                                                                                                                      |
| 4                      | EPI_ISL_403963 | hCoV-19/Nonthaburi/74/2020       | <i>Homo sapiens</i> | Asia / Thailand / Nonthaburi | 2020-01-13      | Bamrasnaradura Hospital                                                                           | 1. Department of Medical Sciences, Ministry of Public Health, Thailand 2. Thai Red Cross Emerging Infectious Diseases - Health Science Centre 3. Department of Disease Control, Ministry of Public Health, Thailand        | Pilailuk,Okada; Siripaporn,Phuygun; Thanutsapa,Thanadachakul; Supaporn,Wacharapluesadee; Sittiporn,Parmmen; Warawan,Wongboot; Sunthareeya,Waicharoen; Rome,Buathong; Malinee,Chittaganpitch; Nanthawan,Mekha                                                                                                       |
| 4                      | EPI_ISL_404228 | hCoV-19/Zhejiang/WZ-02/2020      | <i>Homo sapiens</i> | Asia / China / Zhejiang      | 2020-01-17      | Zhejiang Provincial Center for Disease Control and Prevention                                     | Department of Microbiology, Zhejiang Provincial Center for Disease Control and Prevention                                                                                                                                  | YanJun Zhang, Yin Chen, Haiyan Mao, Junhang Pan, Xiuyu Lou, Yiyu Lu, Juying Yan, Hanping Zhu, Jian Gao, Yan Feng, Yi Sun, Hao Yan, Zhen Li, Yisheng Sun, Liming Gong, Qiong Ge, Wen Shi, Xinying Wang, Wenwu Yao, Zhangnv Yang, Fang Xu, Chen Chen, Enfu Chen, Zhen Wang, Zhiping Chen, Jianmin Jiang, Chonggao Hu |
| 4                      | EPI_ISL_406716 | hCoV-19/China/WHU01/2020         | <i>Homo sapiens</i> | Asia / China / Hubei / Wuhan | 2020-01-02      | unknown                                                                                           | State Key Laboratory of Virology, Wuhan University                                                                                                                                                                         | Chen,L., Liu,W., Zhang,Q., Xu,K., Ye,G., Wu,W., Sun,Z., Liu,F., Wu,K., Mei,Y., Zhang,W., Chen,Y., Li,Y., Shi,M., Lan,K. and Liu,Y.                                                                                                                                                                                 |
| 4                      | EPI_ISL_406717 | hCoV-19/China/WHU02/2020         | <i>Homo sapiens</i> | Asia / China / Hubei / Wuhan | 2020-01-02      | unknown                                                                                           | State Key Laboratory of Virology, Wuhan University                                                                                                                                                                         | Chen,L., Liu,W., Zhang,Q., Xu,K., Ye,G., Wu,W., Sun,Z., Liu,F., Wu,K., Mei,Y., Zhang,W., Chen,Y., Li,Y., Shi,M., Lan,K. and Liu,Y.                                                                                                                                                                                 |
| 4                      | EPI_ISL_406800 | hCoV-19/Wuhan/WH03/2020          | <i>Homo sapiens</i> | Asia / China / Hubei / Wuhan | 2020-01-01      | General Hospital of Central Theater Command of People's Liberation Army of China                  | BGI & Institute of Microbiology, Chinese Academy of Sciences & Shandong First Medical University & Shandong Academy of Medical Sciences & General Hospital of Central Theater Command of People's Liberation Army of China | Weijun Chen, Yuhai Bi, Weifeng Shi and Zhenhong Hu                                                                                                                                                                                                                                                                 |

|   |                |                                 |                     |                                      |            |                                                                                                                                         |                                                                                                                        |                                                                                                                                                                                                                                                                                             |
|---|----------------|---------------------------------|---------------------|--------------------------------------|------------|-----------------------------------------------------------------------------------------------------------------------------------------|------------------------------------------------------------------------------------------------------------------------|---------------------------------------------------------------------------------------------------------------------------------------------------------------------------------------------------------------------------------------------------------------------------------------------|
| 4 | EPI_ISL_408479 | hCoV-19/Chongqing/ZX01/2020     | <i>Homo sapiens</i> | Asia / China / Chongqing / Zhongxian | 2020-01-23 | Zhongxian Center for Disease Control and Prevention                                                                                     | Chongqing Municipal Center for Disease Control and Prevention                                                          | Ye Sheng, Tang Yun, Ling Hua, Zhang Hong, Yu zhen,Chen Shuang,Tan ZhangPing, Su Kun, Li Qin, Tang Wenge, Rong Rong                                                                                                                                                                          |
| 4 | EPI_ISL_410531 | hCoV-19/Japan/NA-20-05-1/2020   | <i>Homo sapiens</i> | Asia / Japan / Nara                  | 2020-01-25 | Dept. of Pathology, National Institute of Infectious Diseases                                                                           | Pathogen Genomics Center, National Institute of Infectious Diseases                                                    | Tsuyoshi Sekizuka, Harutaka Katano, Shutoku Matsuyama, Naganori Nao, Kazuya Shirato, Motoi Suzuki, Hideki Hasegawa, Takaji Wakita, Makoto Takeda, Tadaki Suzuki, Makoto Kuroda                                                                                                              |
| 4 | EPI_ISL_410532 | hCoV-19/Japan/OS-20-07-1/2020   | <i>Homo sapiens</i> | Asia / Japan / Osaka                 | 2020-01-23 | Dept. of Pathology, National Institute of Infectious Diseases                                                                           | Pathogen Genomics Center, National Institute of Infectious Diseases                                                    | Tsuyoshi Sekizuka, Harutaka Katano, Shutoku Matsuyama, Naganori Nao, Kazuya Shirato, Motoi Suzuki, Hideki Hasegawa, Takaji Wakita, Makoto Takeda, Tadaki Suzuki, Makoto Kuroda                                                                                                              |
| 4 | EPI_ISL_411915 | hCoV-19/Taiwan/CGMH-CGU-01/2020 | <i>Homo sapiens</i> | Asia / Taiwan / Taoyuan              | 2020-01-25 | Laboratory Medicine                                                                                                                     | Department of Laboratory Medicine, Lin-Kou Chang Gung Memorial Hospital, Taoyuan, Taiwan.                              | Kuo-Chien Tsao, Yu-Nong Gong, Shu-Li Yang, Yi-Chun Li, Chung-Guei Huang, Yhu-Chering Huang, Shin-Ru Shih                                                                                                                                                                                    |
| 4 | EPI_ISL_411927 | hCoV-19/Taiwan/4/2020           | <i>Homo sapiens</i> | Asia / Taiwan / Taipei               | 2020-01-28 | Taiwan Centers for Disease Control                                                                                                      | Taiwan Centers for Disease Control                                                                                     | Ji-Rong Yang, Yu-Chi-Lin, Jung-Jung Mu, Ming-Tsan-Liu                                                                                                                                                                                                                                       |
| 4 | EPI_ISL_411953 | hCoV-19/Jiangsu/JS03/2020       | <i>Homo sapiens</i> | Asia / China / Jiangsu               | 2020-01-24 | NHC Key laboratory of Enteric Pathogenic Microbiology, Institute of Pathogenic Microbiology Second Hospital of Anhui Medical University | Jiangsu Provincial Center for Disease Control & Prevention                                                             | Kangchen Zhao, Xiaojuan Zhu, Lumbiao Cui, Tao Wu, Yiyue Ge, Bin Wu, Yin Chen, Fengcai Zhu, Baoli Zhu, Ming Wu                                                                                                                                                                               |
| 4 | EPI_ISL_412026 | hCoV-19/Hefei/2/2020            | <i>Homo sapiens</i> | Asia / China / Anhui / Hefei         | 2020-02-23 |                                                                                                                                         | Second Hospital of Anhui Medical University                                                                            | Changtai Wang, Zhongping Liua, Zixiang Chen, Xin Huang, Mengyuan Xua, Tengfei He, Mengji Lu, Zhenhua Zhang                                                                                                                                                                                  |
| 4 | EPI_ISL_413608 | hCoV-19/USA/CruiseA-3/2020      | <i>Homo sapiens</i> | North America / USA                  | 2020-02-18 | unknown                                                                                                                                 | Pathogen Discovery, Respiratory Viruses Branch, Division of Viral Diseases, Centers for Dieases Control and Prevention | Anna Uehara, Ying Tao, Clinton R. Paden, Krista Queen, Jing Zhang, Yan Li, Mary S. Keckler, Alison S Laufer Halpin, Haibin Wang, Jasmine Padilla, Justin Lee, Christopher A. Elkins, Susan I. Gerber, Suxiang Tong                                                                          |
| 4 | EPI_ISL_413610 | hCoV-19/USA/CruiseA-5/2020      | <i>Homo sapiens</i> | North America / USA                  | 2020-02-21 | unknown                                                                                                                                 | Pathogen Discovery, Respiratory Viruses Branch, Division of Viral Diseases, Centers for Dieases Control and Prevention | Anna Uehara, Ying Tao, Clinton R. Paden, Krista Queen, Jing Zhang, Yan Li, Mary S. Keckler, Alison S Laufer Halpin, Haibin Wang, Jasmine Padilla, Justin Lee, Christopher A. Elkins, Susan I. Gerber, Suxiang Tong                                                                          |
| 4 | EPI_ISL_413614 | hCoV-19/USA/CruiseA-9/2020      | <i>Homo sapiens</i> | North America / USA                  | 2020-02-17 | unknown                                                                                                                                 | Pathogen Discovery, Respiratory Viruses Branch, Division of Viral Diseases, Centers for Dieases Control and Prevention | Ying Tao, Clinton R. Paden, Krista Queen, Anna Uehara, Jing Zhang, Yan Li, Haibin Wang, Shifaq Kamili, Xiaoyan Lu, Brian Lynch, Senthil Kumar K. Sakthivel, Brett L. Whitaker, Lijuan Wang, Janna' R. Murray, Jasmine Padilla, Justin Lee, Susan I. Gerber, Stephen Lindstrom, Suxiang Tong |
| 4 | EPI_ISL_413618 | hCoV-19/USA/CruiseA-13/2020     | <i>Homo sapiens</i> | North America / USA                  | 2020-02-20 | unknown                                                                                                                                 | Pathogen Discovery, Respiratory Viruses Branch, Division of Viral Diseases, Centers for Dieases Control and Prevention | Clinton R. Paden, Ying Tao, Krista Queen, Anna Uehara, Jing Zhang, Yan Li, Haibin Wang, Shifaq Kamili, Xiaoyan Lu, Brian Lynch, Senthil Kumar K. Sakthivel, Brett L. Whitaker, Lijuan Wang, Janna' R. Murray, Jasmine Padilla, Justin Lee, Susan I. Gerber, Stephen Lindstrom, Suxiang Tong |
| 4 | EPI_ISL_413620 | hCoV-19/USA/CruiseA-15/2020     | <i>Homo sapiens</i> | North America / USA                  | 2020-02-18 | unknown                                                                                                                                 | Pathogen Discovery, Respiratory Viruses Branch, Division of Viral Diseases, Centers for Dieases Control and Prevention | Clinton R. Paden, Ying Tao, Krista Queen, Anna Uehara, Jing Zhang, Yan Li, Haibin Wang, Shifaq Kamili, Xiaoyan Lu, Brian Lynch, Senthil Kumar K. Sakthivel, Brett L. Whitaker, Lijuan Wang, Janna' R. Murray, Jasmine Padilla, Justin Lee, Susan I. Gerber, Stephen Lindstrom, Suxiang Tong |
| 4 | EPI_ISL_413621 | hCoV-19/USA/CruiseA-16/2020     | <i>Homo sapiens</i> | North America / USA                  | 2020-02-18 | unknown                                                                                                                                 | Pathogen Discovery, Respiratory Viruses Branch, Division of Viral Diseases, Centers for Dieases Control and Prevention | Clinton R. Paden, Ying Tao, Krista Queen, Anna Uehara, Jing Zhang, Yan Li, Haibin Wang, Shifaq Kamili, Xiaoyan Lu, Brian Lynch, Senthil Kumar K. Sakthivel, Brett L. Whitaker, Lijuan Wang, Janna' R. Murray, Jasmine Padilla, Justin Lee, Susan I. Gerber, Stephen Lindstrom, Suxiang Tong |
| 4 | EPI_ISL_414479 | hCoV-19/USA/CruiseA-19/2020     | <i>Homo sapiens</i> | North America / USA                  | 2020-02-18 | unknown                                                                                                                                 | Pathogen Discovery, Respiratory Viruses Branch, Division of Viral Diseases, Centers for Disease Control and Prevention | Ying Tao, Krista Queen, Clinton R. Paden, Anna Uehara, Jing Zhang, Yan Li, Mary S. Keckler, Alison S. Laufer Halpin, Haibin Wang, Jasmine Padilla, Justin Lee, Christopher A. Elkins, Susan I. Gerber, Suxiang Tong                                                                         |
| 4 | EPI_ISL_414481 | hCoV-19/USA/CruiseA-22/2020     | <i>Homo sapiens</i> | North America / USA                  | 2020-02-21 | unknown                                                                                                                                 | Pathogen Discovery, Respiratory Viruses Branch, Division of Viral Diseases, Centers for Disease Control and Prevention | Ying Tao, Krista Queen, Clinton R. Paden, Anna Uehara, Jing Zhang, Yan Li, Mary S. Keckler, Alison S. Laufer Halpin, Haibin Wang, Jasmine Padilla, Justin Lee, Christopher A. Elkins, Susan I. Gerber, Suxiang Tong                                                                         |

|    |                |                                             |                     |                              |            |                                                                                                                                                                                                                                |                                                                                                                                                                                                                                |                                                                                                                                                                                                         |
|----|----------------|---------------------------------------------|---------------------|------------------------------|------------|--------------------------------------------------------------------------------------------------------------------------------------------------------------------------------------------------------------------------------|--------------------------------------------------------------------------------------------------------------------------------------------------------------------------------------------------------------------------------|---------------------------------------------------------------------------------------------------------------------------------------------------------------------------------------------------------|
| 4  | EPI_ISL_415711 | hCoV-19/Hangzhou/ZJU-05/2020                | <i>Homo sapiens</i> | Asia / China / Hangzhou      | 2020-01-22 | State Key Laboratory for Diagnosis and Treatment of Infectious Diseases, National Clinical Research Center for Infectious Diseases, First Affiliated Hospital, Zhejiang University School of Medicine, Hangzhou, China. 310003 | State Key Laboratory for Diagnosis and Treatment of Infectious Diseases, National Clinical Research Center for Infectious Diseases, First Affiliated Hospital, Zhejiang University School of Medicine, Hangzhou, China. 310003 | Hangping Yao, Nanping Wu, Chao Jiang, Xiangyun Lu, Linfang Cheng, Fumin Liu, Zhigang Wu, Haibo Wu, Changzhong Jin, Min Zheng, Lanjuan Li                                                                |
| 4  | EPI_ISL_416046 | hCoV-19/Hangzhou/ZJU-04/2020                | <i>Homo sapiens</i> | Asia / China / Hangzhou      | 2020-01-24 | State Key Laboratory for Diagnosis and Treatment of Infectious Diseases, National Clinical Research Center for Infectious Diseases, First Affiliated Hospital, Zhejiang University School of Medicine, Hangzhou, China 310003  | State Key Laboratory for Diagnosis and Treatment of Infectious Diseases, National Clinical Research Center for Infectious Diseases, First Affiliated Hospital, Zhejiang University School of Medicine, Hangzhou, China 310003  | Hangping Yao, Nanping Wu, Chao Jiang, Xiangyun Lu, Linfang Cheng, Fumin Liu, Zhigang Wu, Haibo Wu, Changzhong Jin, Min Zheng, Lanjuan Li                                                                |
| 4  | MT192759       | SARS-CoV-2/CGMH-CGU-01/Homo sapiens2020/TWN | <i>Homo sapiens</i> | Taiwan                       | 2020-01-25 | not specified                                                                                                                                                                                                                  | not specified                                                                                                                                                                                                                  | Tsao,K.-C., Gong,Y.-N., Yang,S.-L., Liu,Y.-C., Huang,C.-G., Huang,Y.-C., Chen,G.-W. and Shih,S.-R.                                                                                                      |
| 4  | NC_045512      | Wuhan-Hu-1                                  | <i>Homo sapiens</i> | China                        | 2019-12    | not specified                                                                                                                                                                                                                  | not specified                                                                                                                                                                                                                  | Wu,F., Zhao,S., Yu,B., Chen,Y.-M., Wang,W., Hu,Y., Song,Z.-G., Tao,Z.-W., Tian,J.-H., Pei,Y.-Y., Yuan,M.L., Zhang,Y.-L., Dai,F.-H., Liu,Y., Wang,Q.-M., Zheng,J.-J., Xu,L., Holmes,E.C. and Zhang,Y.-Z. |
| 4  | MT184909       | 2019-nCoV/USA-CruiseA-22/2020               | <i>Homo sapiens</i> | USA                          | 2020-02-21 | not specified                                                                                                                                                                                                                  | not specified                                                                                                                                                                                                                  | Tao,Y., Queen,K., Paden,C.R., Uehara,A., Zhang,J., Li,Y., Keckler,M.S., Laufer Halpin,A.S., Wang,H., Padilla,J., Lee,J., Elkins,C.A., Gerber,S.I. and Tong,S.                                           |
| 4  | MT184907       | 2019-nCoV/USA-CruiseA-19/2020               | <i>Homo sapiens</i> | USA                          | 2020-02-18 | not specified                                                                                                                                                                                                                  | not specified                                                                                                                                                                                                                  | Tao,Y., Queen,K., Paden,C.R., Uehara,A., Zhang,J., Li,Y., Keckler,M.S., Laufer Halpin,A.S., Wang,H., Padilla,J., Lee,J., Elkins,C.A., Gerber,S.I. and Tong,S.                                           |
| 4  | LR757996       | SARS-CoV-2                                  | <i>Homo sapiens</i> | China:Wuhan                  | 2020-01-01 | not specified                                                                                                                                                                                                                  | not specified                                                                                                                                                                                                                  | Hunter,C. and Wei,X.                                                                                                                                                                                    |
| 4  | MN988669       | 2019-nCoV WHU02                             | <i>Homo sapiens</i> | China                        | 2020-01-02 | not specified                                                                                                                                                                                                                  | not specified                                                                                                                                                                                                                  | Chen,L., Liu,W., Zhang,Q., Xu,K., Ye,G., Wu,W., Sun,Z., Liu,F., Wu,K., Mei,Y., Zhang,W., Chen,Y., Li,Y., Shi,M., Lan,K. and Liu,Y.                                                                      |
| 5  | EPI_ISL_402127 | hCoV-19/Wuhan/WIV02/2019                    | <i>Homo sapiens</i> | Asia / China / Hubei / Wuhan | 2019-12-30 | Wuhan Jinyintan Hospital                                                                                                                                                                                                       | Wuhan Institute of Virology, Chinese Academy of Sciences                                                                                                                                                                       | Peng Zhou, Xing-Lou Yang, Ding-Yu Zhang, Lei Zhang, Yan Zhu, Hao-Rui Si, Zhengli Shi                                                                                                                    |
| 6  | EPI_ISL_402128 | hCoV-19/Wuhan/WIV05/2019                    | <i>Homo sapiens</i> | Asia / China / Hubei / Wuhan | 2019-12-30 | Wuhan Jinyintan Hospital                                                                                                                                                                                                       | Wuhan Institute of Virology, Chinese Academy of Sciences                                                                                                                                                                       | Peng Zhou, Xing-Lou Yang, Ding-Yu Zhang, Lei Zhang, Yan Zhu, Hao-Rui Si, Zhengli Shi                                                                                                                    |
| 7  | EPI_ISL_402129 | hCoV-19/Wuhan/WIV06/2019                    | <i>Homo sapiens</i> | Asia / China / Hubei / Wuhan | 2019-12-30 | Wuhan Jinyintan Hospital                                                                                                                                                                                                       | Wuhan Institute of Virology, Chinese Academy of Sciences                                                                                                                                                                       | Peng Zhou, Xing-Lou Yang, Ding-Yu Zhang, Lei Zhang, Yan Zhu, Hao-Rui Si, Zhengli Shi                                                                                                                    |
| 8  | EPI_ISL_402130 | hCoV-19/Wuhan/WIV07/2019                    | <i>Homo sapiens</i> | Asia / China / Hubei / Wuhan | 2019-12-30 | Wuhan Jinyintan Hospital                                                                                                                                                                                                       | Wuhan Institute of Virology, Chinese Academy of Sciences                                                                                                                                                                       | Peng Zhou, Xing-Lou Yang, Ding-Yu Zhang, Lei Zhang, Yan Zhu, Hao-Rui Si, Zhengli Shi                                                                                                                    |
| 9  | EPI_ISL_402132 | hCoV-19/Wuhan/HBCDC-HB-01/2019              | <i>Homo sapiens</i> | Asia / China / Hubei / Wuhan | 2019-12-30 | Wuhan Jinyintan Hospital                                                                                                                                                                                                       | Hubei Provincial Center for Disease Control and Prevention                                                                                                                                                                     | Bin Fang, Xiang Li, Xiao Yu, Linlin Liu, Bo Yang, Faxian Zhan, Guojun Ye, Xixiang Huo, Junqiang Xu, Bo Yu, Kun Cai, Jing Li, Yongzhong Jiang.                                                           |
| 10 | EPI_ISL_403928 | hCoV-19/Wuhan/IPBCAMS-WH-05/2020            | <i>Homo sapiens</i> | Asia / China / Hubei / Wuhan | 2020-01-01 | Institute of Pathogen Biology, Chinese Academy of Medical Sciences & Peking Union Medical College                                                                                                                              | Institute of Pathogen Biology, Chinese Academy of Medical Sciences & Peking Union Medical College                                                                                                                              | Lili Ren, Jianwei Wang, Qi Jin, Zichun Xiang, Zhiqiang Wu, Chao Wu, Yiwei Liu                                                                                                                           |

|    |                |                                  |                     |                                     |            |                                                                                                     |                                                                                                   |                                                                                                                                                                                                                                                                                                                                                                                                        |
|----|----------------|----------------------------------|---------------------|-------------------------------------|------------|-----------------------------------------------------------------------------------------------------|---------------------------------------------------------------------------------------------------|--------------------------------------------------------------------------------------------------------------------------------------------------------------------------------------------------------------------------------------------------------------------------------------------------------------------------------------------------------------------------------------------------------|
| 11 | EPI_ISL_403930 | hCoV-19/Wuhan/IPBCAMS-WH-03/2019 | <i>Homo sapiens</i> | Asia / China / Hubei / Wuhan        | 2019-12-30 | Institute of Pathogen Biology, Chinese Academy of Medical Sciences & Peking Union Medical College   | Institute of Pathogen Biology, Chinese Academy of Medical Sciences & Peking Union Medical College | Lili Ren, Jianwei Wang, Qi Jin, Zichun Xiang, Zhiqiang Wu, Chao Wu, Yiwei Liu                                                                                                                                                                                                                                                                                                                          |
| 12 | EPI_ISL_403931 | hCoV-19/Wuhan/IPBCAMS-WH-02/2019 | <i>Homo sapiens</i> | Asia / China / Hubei / Wuhan        | 2019-12-30 | Institute of Pathogen Biology, Chinese Academy of Medical Sciences & Peking Union Medical College   | Institute of Pathogen Biology, Chinese Academy of Medical Sciences & Peking Union Medical College | Lili Ren, Jianwei Wang, Qi Jin, Zichun Xiang, Zhiqiang Wu, Chao Wu, Yiwei Liu                                                                                                                                                                                                                                                                                                                          |
| 13 | EPI_ISL_403932 | hCoV-19/Guangdong/20SF012/2020   | <i>Homo sapiens</i> | Asia / China / Guangdong / Shenzhen | 2020-01-14 | Guangdong Provincial Center for Diseases Control and Prevention; Guangdong Provincial Public Health | Department of Microbiology, Guangdong Provincial Center for Diseases Control and Prevention       | Min Kang, Jie Wu, Jing Lu, Tao Liu, Baisheng Li, Shujiang Mei, Feng Ruan, Lifeng Lin, Changwen Ke, Haojie Zhong, Yingtao Zhang, Lirong Zou, Xuguang Chen, Qi Zhu, Jianpeng Xiao, Jianxiang Geng, Zhe Liu, Jianxiong Hu, Weilin Zeng, Xing Li, Yuhuang Liao, Xiujuan Tang, Songjian Xiao, Ying Wang, Yingchao Song, Xue Zhuang, Lijun Liang, Guanhao He, Huihong Deng, Tie Song, Jianfeng He, Wenjun Ma |
| 13 | EPI_ISL_403933 | hCoV-19/Guangdong/20SF013/2020   | <i>Homo sapiens</i> | Asia / China / Guangdong / Shenzhen | 2020-01-15 | Guangdong Provincial Center for Diseases Control and Prevention; Guangdong Provincial Public Health | Department of Microbiology, Guangdong Provincial Center for Diseases Control and Prevention       | Min Kang, Jie Wu, Jing Lu, Tao Liu, Baisheng Li, Shujiang Mei, Feng Ruan, Lifeng Lin, Changwen Ke, Haojie Zhong, Yingtao Zhang, Lirong Zou, Xuguang Chen, Qi Zhu, Jianpeng Xiao, Jianxiang Geng, Zhe Liu, Jianxiong Hu, Weilin Zeng, Xing Li, Yuhuang Liao, Xiujuan Tang, Songjian Xiao, Ying Wang, Yingchao Song, Xue Zhuang, Lijun Liang, Guanhao He, Huihong Deng, Tie Song, Jianfeng He, Wenjun Ma |
| 13 | EPI_ISL_403935 | hCoV-19/Guangdong/20SF025/2020   | <i>Homo sapiens</i> | Asia / China / Guangdong / Shenzhen | 2020-01-15 | Guangdong Provincial Center for Diseases Control and Prevention; Guangdong Provincial Public Health | Department of Microbiology, Guangdong Provincial Center for Diseases Control and Prevention       | Min Kang, Jie Wu, Jing Lu, Tao Liu, Baisheng Li, Shujiang Mei, Feng Ruan, Lifeng Lin, Changwen Ke, Haojie Zhong, Yingtao Zhang, Lirong Zou, Xuguang Chen, Qi Zhu, Jianpeng Xiao, Jianxiang Geng, Zhe Liu, Jianxiong Hu, Weilin Zeng, Xing Li, Yuhuang Liao, Xiujuan Tang, Songjian Xiao, Ying Wang, Yingchao Song, Xue Zhuang, Lijun Liang, Guanhao He, Huihong Deng, Tie Song, Jianfeng He, Wenjun Ma |
| 14 | EPI_ISL_403934 | hCoV-19/Guangdong/20SF014/2020   | <i>Homo sapiens</i> | Asia / China / Guangdong / Shenzhen | 2020-01-15 | Guangdong Provincial Center for Diseases Control and Prevention; Guangdong Provincial Public Health | Department of Microbiology, Guangdong Provincial Center for Diseases Control and Prevention       | Min Kang, Jie Wu, Jing Lu, Tao Liu, Baisheng Li, Shujiang Mei, Feng Ruan, Lifeng Lin, Changwen Ke, Haojie Zhong, Yingtao Zhang, Lirong Zou, Xuguang Chen, Qi Zhu, Jianpeng Xiao, Jianxiang Geng, Zhe Liu, Jianxiong Hu, Weilin Zeng, Xing Li, Yuhuang Liao, Xiujuan Tang, Songjian Xiao, Ying Wang, Yingchao Song, Xue Zhuang, Lijun Liang, Guanhao He, Huihong Deng, Tie Song, Jianfeng He, Wenjun Ma |
| 15 | EPI_ISL_403936 | hCoV-19/Guangdong/20SF028/2020   | <i>Homo sapiens</i> | Asia / China / Guangdong / Zhuhai   | 2020-01-17 | Guangdong Provincial Center for Diseases Control and Prevention; Guangdong Provincial Public Health | Department of Microbiology, Guangdong Provincial Center for Diseases Control and Prevention       | Min Kang, Jie Wu, Jing Lu, Tao Liu, Baisheng Li, Shujiang Mei, Feng Ruan, Lifeng Lin, Changwen Ke, Haojie Zhong, Yingtao Zhang, Lirong Zou, Xuguang Chen, Qi Zhu, Jianpeng Xiao, Jianxiang Geng, Zhe Liu, Jianxiong Hu, Weilin Zeng, Xing Li, Yuhuang Liao, Xiujuan Tang, Songjian Xiao, Ying Wang, Yingchao Song, Xue Zhuang, Lijun Liang, Guanhao He, Huihong Deng, Tie Song, Jianfeng He, Wenjun Ma |
| 15 | EPI_ISL_403937 | hCoV-19/Guangdong/20SF040/2020   | <i>Homo sapiens</i> | Asia / China / Guangdong / Zhuhai   | 2020-01-18 | Guangdong Provincial Center for Diseases Control and Prevention; Guangdong Provincial Public Health | Department of Microbiology, Guangdong Provincial Center for Diseases Control and Prevention       | Min Kang, Jie Wu, Jing Lu, Tao Liu, Baisheng Li, Shujiang Mei, Feng Ruan, Lifeng Lin, Changwen Ke, Haojie Zhong, Yingtao Zhang, Lirong Zou, Xuguang Chen, Qi Zhu, Jianpeng Xiao, Jianxiang Geng, Zhe Liu, Jianxiong Hu, Weilin Zeng, Xing Li, Yuhuang Liao, Xiujuan Tang, Songjian Xiao, Ying Wang, Yingchao Song, Xue Zhuang, Lijun Liang, Guanhao He, Huihong Deng, Tie Song, Jianfeng He, Wenjun Ma |

|    |                |                                  |                     |                                                     |            |                                                               |                                                                                                                                                                                                                     |                                                                                                                                                                                                                                                                                                                                                                                                                                |
|----|----------------|----------------------------------|---------------------|-----------------------------------------------------|------------|---------------------------------------------------------------|---------------------------------------------------------------------------------------------------------------------------------------------------------------------------------------------------------------------|--------------------------------------------------------------------------------------------------------------------------------------------------------------------------------------------------------------------------------------------------------------------------------------------------------------------------------------------------------------------------------------------------------------------------------|
| 16 | EPI_ISL_403962 | hCoV-19/Nonthaburi/61/2020       | <i>Homo sapiens</i> | Asia / Thailand / Nonthaburi                        | 2020-01-08 | Bamrasnaradura Hospital                                       | 1. Department of Medical Sciences, Ministry of Public Health, Thailand 2. Thai Red Cross Emerging Infectious Diseases - Health Science Centre 3. Department of Disease Control, Ministry of Public Health, Thailand | Pilailuk,Okada; Siripaporn,Phuygun; Thanutsapa,Thandachakul; Supaporn,Wacharapluesadee; Sittiporn,Parmmen; Warawan,Wongboot; Sunthareeya,Waicharoen; Rome,Buathong; Malinee,Chittaganpitch; Nanthawan,Mekha                                                                                                                                                                                                                    |
| 16 | EPI_ISL_412899 | hCoV-19/Wuhan/HBCDC-HB-03/2019   | <i>Homo sapiens</i> | Asia / China / Hubei / Wuhan                        | 2019-12-30 | Wuhan Jinyintan Hospital                                      | Hubei Provincial Center for Disease Control and Prevention                                                                                                                                                          | Bin Fang, Xiang Li, Xiao Yu, Linlin Liu, Bo Yang, Faxian Zhan, Guojun Ye, Xixiang Huo, Junqiang Xu, Bo Yu, Kun Cai, Jing Li, Yongzhong Jiang.                                                                                                                                                                                                                                                                                  |
| 17 | EPI_ISL_404227 | hCoV-19/Zhejiang/WZ-01/2020      | <i>Homo sapiens</i> | Asia / China / Zhejiang                             | 2020-01-16 | Zhejiang Provincial Center for Disease Control and Prevention | Department of Microbiology, Zhejiang Provincial Center for Disease Control and Prevention                                                                                                                           | Yin Chen, Yanjun Zhang, Haiyan Mao, Junhang Pan, Xiuyu Lou, Yiyu Lu, Juying Yan, Hanping Zhu, Jian Gao, Yan Feng, Yi Sun, Hao Yan, Zhen Li, Yisheng Sun, Liming Gong, Qiong Ge, Wen Shi, Xinying Wang, Wenwu Yao, Zhangnv Yang, Fang Xu, Chen Chen, Enfu Chen, Zhen Wang, Zhiping Chen, Jianmin Jiang, Chonggao Hu                                                                                                             |
| 18 | EPI_ISL_404895 | hCoV-19/USA/WA1/2020             | <i>Homo sapiens</i> | North America / USA / Washington / Snohomish County | 2020-01-19 | Providence Regional Medical Center                            | Division of Viral Diseases, Centers for Disease Control and Prevention                                                                                                                                              | Queen,K., Tao,Y., Li,Y., Paden,C.R., Lu,X., Zhang,J., Gerber,S.I., Lindstrom,S., Tong,S.                                                                                                                                                                                                                                                                                                                                       |
| 18 | EPI_ISL_407214 | hCoV-19/USA/WA1-A12/2020         | <i>Homo sapiens</i> | North America / USA / Washington                    | 2020-01-25 | WA State Department of Health                                 | Pathogen Discovery, Respiratory Viruses Branch, Division of Viral Diseases, Centers for Diseases Control and Prevention                                                                                             | Krista Queen, Azaibi Tamin, Jennifer Harcourt, Ying Tao, Clinton R. Paden, Jing Zhang, Yan Li, Anna Uehara, Xiaoyan Lu, Shifaq Kamili, Rashi Gautam, Haibin Wang, Janna' R. Murray, Susan I. Gerber, Stephen Lindstrom, Natalie Thornburg, Suxiang Tong                                                                                                                                                                        |
| 18 | EPI_ISL_407215 | hCoV-19/USA/WA1-F6/2020          | <i>Homo sapiens</i> | North America / USA / Washington                    | 2020-01-25 | Washington State Department of Health                         | Pathogen Discovery, Respiratory Viruses Branch, Division of Viral Diseases, Centers for Diseases Control and Prevention                                                                                             | Krista Queen, Azaibi Tamin, Jennifer Harcourt, Ying Tao, Clinton R. Paden, Jing Zhang, Yan Li, Anna Uehara, Xiaoyan Lu, Shifaq Kamili, Rashi Gautam, Haibin Wang, Janna' R. Murray, Susan I. Gerber, Stephen Lindstrom, Natalie Thornburg, Suxiang Tong                                                                                                                                                                        |
| 18 | EPI_ISL_411060 | hCoV-19/Fujian/8/2020            | <i>Homo sapiens</i> | Asia / China / Fujian                               | 2020-01-21 | Fujian Center for Disease Control and Prevention              | Fujian Center for Disease Control and Prevention                                                                                                                                                                    | Chen Wei, Zhang Yanhua, He Wenxiang, Weng Yuwei                                                                                                                                                                                                                                                                                                                                                                                |
| 18 | MT020881       | 2019-nCoV/USA-WA1-F6/2020        | <i>Homo sapiens</i> | USA: WA                                             | 2020-01-25 | not specified                                                 | not specified                                                                                                                                                                                                       | Queen,K., Tamin,A., Harcourt,J., Tao,Y., Paden,C.R., Zhang,J., Li,Y., Uehara,A., Lu,X., Kamili,S., Gautam,R., Wang,H., Murray,J.R., Gerber,S.I., Lindstrom,S., Thornburg,N. and Tong,S.                                                                                                                                                                                                                                        |
| 18 | MT020880       | 2019-nCoV/USA-WA1-A12/2020       | <i>Homo sapiens</i> | USA: WA                                             | 2020-01-25 | not specified                                                 | not specified                                                                                                                                                                                                       | Queen,K., Tamin,A., Harcourt,J., Tao,Y., Paden,C.R., Zhang,J., Li,Y., Uehara,A., Lu,X., Kamili,S., Gautam,R., Wang,H., Murray,J.R., Gerber,S.I., Lindstrom,S., Thornburg,N. and Tong,S.                                                                                                                                                                                                                                        |
| 18 | MN985325       | 2019-nCoV/USA-WA1/2020           | <i>Homo sapiens</i> | USA                                                 | 2020-01-19 | not specified                                                 | not specified                                                                                                                                                                                                       | Harcourt,J., Tamin,A., Lu,X., Kamili,S., Sakthivel,S.K., Murray,J., Queen,K., Tao,Y., Paden,C.R., Zhang,J., Li,Y., Uehara,A., Wang,H., Goldsmith,C., Bullock,H.A., Wang,L., Whitaker,B., Lynch,B., Gautam,R., Schindewolf,C., Lokugamage,K.G., Scharton,D., Plante,J.A., Mirchandani,D., Widen,S.G., Narayanan,K., Makino,S., Ksiazek,T.G., Plante,K.S., Weaver,S.C., Lindstrom,S., Tong,S., Menachery,V.D. and Thornburg,N.J. |
| 19 | EPI_ISL_405839 | hCoV-19/Shenzhen/HKU-SZ-005/2020 | <i>Homo sapiens</i> | Asia / China / Guangdong / Shenzhen                 | 2020-01-11 | The University of Hong Kong - Shenzhen Hospital               | Li Ka Shing Faculty of Medicine, The University of Hong Kong                                                                                                                                                        | Chan,J.F.-W., Yuan,S., Kok,K.H., To,K.K.-W., Chu,H., Yang,J., Xing,F., Liu,J., Yip,C.C.-Y., Poon,R.W.-S., Tsai,H.W., Lo,S.K.-F., Chan,K.H., Poon,V.K.-M., Chan,W.M., Ip,J.D., Cai,J.P., Cheng,V.C.-C., Chen,H., Hui,C.K.-M. and Yuen,K.Y.                                                                                                                                                                                      |
| 20 | EPI_ISL_406030 | hCoV-19/Shenzhen/HKU-SZ-002/2020 | <i>Homo sapiens</i> | Asia / China / Guangdong / Shenzhen                 | 2020-01-10 | The University of Hong Kong - Shenzhen Hospital               | Li Ka Shing Faculty of Medicine, The University of Hong Kong                                                                                                                                                        | Chan,J.F.-W., Yuan,S., Kok,K.H., To,K.K.-W., Chu,H., Yang,J., Xing,F., Liu,J., Yip,C.C.-Y., Poon,R.W.-S., Tsai,H.W., Lo,S.K.-F., Chan,K.H., Poon,V.K.-M., Chan,W.M., Ip,J.D., Cai,J.P., Cheng,V.C.-C., Chen,H., Hui,C.K.-M. and Yuen,K.Y.                                                                                                                                                                                      |
| 21 | EPI_ISL_406031 | hCoV-19/Taiwan/2/2020            | <i>Homo sapiens</i> | Asia / Taiwan / Kaohsiung                           | 2020-01-23 | Centers for Disease Control, R.O.C. (Taiwan)                  | Centers for Disease Control, R.O.C. (Taiwan)                                                                                                                                                                        | Ji-Rong Yang, Yu-Chi Lin, Jung-Jung Mu, Ming-Tsan Liu, Shu-Ying Li                                                                                                                                                                                                                                                                                                                                                             |
| 22 | EPI_ISL_406034 | hCoV-19/USA/CA1/2020             | <i>Homo sapiens</i> | North America / USA / California / Los Angeles      | 2020-01-23 | California Department of Public Health                        | Pathogen Discovery, Respiratory Viruses Branch, Division of Viral Diseases, Centers for Diseases Control and Prevention                                                                                             | Anna Uehara, Krista Queen, Ying Tao, Yan Li, Clinton R. Paden, Jing Zhang, Xiaoyan Lu, Brian Lynch, Senthil Kumar K. Sakthivel, Brett L. Whitaker, Shifaq Kamili, Lijuan Wang, Janna' R. Murray, Susan I. Gerber, Stephen Lindstrom, Suxiang Tong                                                                                                                                                                              |

|    |                |                                |                     |                                                  |            |                                                                                                                                              |                                                                                                                                              |                                                                                                                                                                                                                                                                                                                                                                                                        |
|----|----------------|--------------------------------|---------------------|--------------------------------------------------|------------|----------------------------------------------------------------------------------------------------------------------------------------------|----------------------------------------------------------------------------------------------------------------------------------------------|--------------------------------------------------------------------------------------------------------------------------------------------------------------------------------------------------------------------------------------------------------------------------------------------------------------------------------------------------------------------------------------------------------|
| 23 | EPI_ISL_406036 | hCoV-19/USA/CA2/2020           | <i>Homo sapiens</i> | North America / USA / California / Orange County | 2020-01-22 | California Department of Public Health                                                                                                       | Pathogen Discovery, Respiratory Viruses Branch, Division of Viral Diseases, Centers for Disease Control and Prevention                       | Anna Uehara, Krista Queen, Ying Tao, Yan Li, Clinton R. Paden, Jing Zhang, Xiaoyan Lu, Brian Lynch, Senthil Kumar K. Sakthivel, Brett L. Whitaker, Shifaq Kamili, Lijuan Wang, Janna' R. Murray, Susan I. Gerber, Stephen Lindstrom, Suxiang Tong                                                                                                                                                      |
| 24 | EPI_ISL_406223 | hCoV-19/USA/AZ1/2020           | <i>Homo sapiens</i> | North America / USA / Arizona / Phoenix          | 2020-01-22 | Arizona Department of Health Services                                                                                                        | Pathogen Discovery, Respiratory Viruses Branch, Division of Viral Diseases, Centers for Disease Control and Prevention                       | Ying Tao, Clinton R. Paden, Krista Queen, Anna Uehara, Yan Li, Jing Zhang, Xiaoyan Lu, Brian Lynch, Senthil Kumar K. Sakthivel, Brett L. Whitaker, Shifaq Kamili, Lijuan Wang, Janna' R. Murray, Susan I. Gerber, Stephen Lindstrom, Suxiang Tong                                                                                                                                                      |
| 25 | EPI_ISL_406531 | hCoV-19/Guangdong/20SF174/2020 | <i>Homo sapiens</i> | Asia / China / Guangdong / Zhuhai                | 2020-01-22 | Guangdong Provincial Center for Diseases Control and Prevention; Guangdong Provincial Public Health                                          | Guangdong Provincial Center for Disease Control and Prevention                                                                               | Min Kang, Jie Wu, Jing Lu, Tao Liu, Baisheng Li, Shujiang Mei, Feng Ruan, Lifeng Lin, Changwen Ke, Haojie Zhong, Yingtao Zhang, Lirong Zou, Xuguang Chen, Qi Zhu, Jianpeng Xiao, Jianxiang Geng, Zhe Liu, Jianxiang Hu, Weilin Zeng, Xing Li, Yuhuang Liao, Xiujian Tang, Songjian Xiao, Ying Wang, Yingchao Song, Xue Zhuang, Lijun Liang, Guanhao He, Huihong Deng, Tie Song, Jianfeng He, Wenjun Ma |
| 26 | EPI_ISL_406533 | hCoV-19/Guangzhou/20SF206/2020 | <i>Homo sapiens</i> | Asia / China / Guangdong / Guangzhou             | 2020-01-22 | Guangdong Provincial Center for Diseases Control and Prevention; Guangdong Provincial Public Health                                          | Guangdong Provincial Center for Diseases Control and Prevention                                                                              | Min Kang, Jie Wu, Jing Lu, Tao Liu, Baisheng Li, Shujiang Mei, Feng Ruan, Lifeng Lin, Changwen Ke, Haojie Zhong, Yingtao Zhang, Lirong Zou, Xuguang Chen, Qi Zhu, Jianpeng Xiao, Jianxiang Geng, Zhe Liu, Jianxiang Hu, Weilin Zeng, Xing Li, Yuhuang Liao, Xiujian Tang, Songjian Xiao, Ying Wang, Yingchao Song, Xue Zhuang, Lijun Liang, Guanhao He, Huihong Deng, Tie Song, Jianfeng He, Wenjun Ma |
| 27 | EPI_ISL_406534 | hCoV-19/Foshan/20SF207/2020    | <i>Homo sapiens</i> | Asia / China / Guangdong / Foshan                | 2020-01-22 | Guangdong Provincial Center for Diseases Control and Prevention; Guangdong Provincial Public Health                                          | Guangdong Provincial Center for Diseases Control and Prevention                                                                              | Min Kang, Jie Wu, Jing Lu, Tao Liu, Baisheng Li, Shujiang Mei, Feng Ruan, Lifeng Lin, Changwen Ke, Haojie Zhong, Yingtao Zhang, Lirong Zou, Xuguang Chen, Qi Zhu, Jianpeng Xiao, Jianxiang Geng, Zhe Liu, Jianxiang Hu, Weilin Zeng, Xing Li, Yuhuang Liao, Xiujian Tang, Songjian Xiao, Ying Wang, Yingchao Song, Xue Zhuang, Lijun Liang, Guanhao He, Huihong Deng, Tie Song, Jianfeng He, Wenjun Ma |
| 28 | EPI_ISL_406535 | hCoV-19/Foshan/20SF210/2020    | <i>Homo sapiens</i> | Asia / China / Guangdong / Foshan                | 2020-01-22 | Guangdong Provincial Center for Diseases Control and Prevention; Guangdong Provincial Public Health                                          | Guangdong Provincial Center for Diseases Control and Prevention                                                                              | Min Kang, Jie Wu, Jing Lu, Tao Liu, Baisheng Li, Shujiang Mei, Feng Ruan, Lifeng Lin, Changwen Ke, Haojie Zhong, Yingtao Zhang, Lirong Zou, Xuguang Chen, Qi Zhu, Jianpeng Xiao, Jianxiang Geng, Zhe Liu, Jianxiang Hu, Weilin Zeng, Xing Li, Yuhuang Liao, Xiujian Tang, Songjian Xiao, Ying Wang, Yingchao Song, Xue Zhuang, Lijun Liang, Guanhao He, Huihong Deng, Tie Song, Jianfeng He, Wenjun Ma |
| 29 | EPI_ISL_406536 | hCoV-19/Foshan/20SF211/2020    | <i>Homo sapiens</i> | Asia / China / Guangdong / Foshan                | 2020-01-22 | Guangdong Provincial Center for Diseases Control and Prevention; Guangdong Provincial Public Health                                          | Guangdong Provincial Center for Diseases Control and Prevention                                                                              | Min Kang, Jie Wu, Jing Lu, Tao Liu, Baisheng Li, Shujiang Mei, Feng Ruan, Lifeng Lin, Changwen Ke, Haojie Zhong, Yingtao Zhang, Lirong Zou, Xuguang Chen, Qi Zhu, Jianpeng Xiao, Jianxiang Geng, Zhe Liu, Jianxiang Hu, Weilin Zeng, Xing Li, Yuhuang Liao, Xiujian Tang, Songjian Xiao, Ying Wang, Yingchao Song, Xue Zhuang, Lijun Liang, Guanhao He, Huihong Deng, Tie Song, Jianfeng He, Wenjun Ma |
| 30 | EPI_ISL_406538 | hCoV-19/Guangdong/20SF201/2020 | <i>Homo sapiens</i> | Asia / China / Guangdong                         | 2020-01-23 | Guangdong Provincial Center for Diseases Control and Prevention; Guangdong Provincial Institute of Public Health                             | Guangdong Provincial Center for Diseases Control and Prevention                                                                              | Min Kang, Jie Wu, Jing Lu, Tao Liu, Baisheng Li, Shujiang Mei, Feng Ruan, Lifeng Lin, Changwen Ke, Haojie Zhong, Yingtao Zhang, Lirong Zou, Xuguang Chen, Qi Zhu, Jianpeng Xiao, Jianxiang Geng, Zhe Liu, Jianxiang Hu, Weilin Zeng, Xing Li, Yuhuang Liao, Xiujian Tang, Songjian Xiao, Ying Wang, Yingchao Song, Xue Zhuang, Lijun Liang, Guanhao He, Huihong Deng, Tie Song, Jianfeng He, Wenjun Ma |
| 31 | EPI_ISL_406593 | hCoV-19/Shenzhen/SZTH-002/2020 | <i>Homo sapiens</i> | Asia / China / Guangdong / Shenzhen              | 2020-01-13 | Shenzhen Key Laboratory of Pathogen and Immunity, National Clinical Research Center for Infectious Disease, Shenzhen Third People's Hospital | Shenzhen Key Laboratory of Pathogen and Immunity, National Clinical Research Center for Infectious Disease, Shenzhen Third People's Hospital | Yang Yang, Chenguang Shen, Li Xing, Zhixiang Xu, Haixia Zheng, Yingxia Liu                                                                                                                                                                                                                                                                                                                             |

|    |                |                                 |                     |                                         |            |                                                                                                                                                                                                                  |                                                                                                                                                                                                                            |                                                                                                                                                                                        |
|----|----------------|---------------------------------|---------------------|-----------------------------------------|------------|------------------------------------------------------------------------------------------------------------------------------------------------------------------------------------------------------------------|----------------------------------------------------------------------------------------------------------------------------------------------------------------------------------------------------------------------------|----------------------------------------------------------------------------------------------------------------------------------------------------------------------------------------|
| 32 | EPI_ISL_406594 | hCoV-19/Shenzhen/SZTH-003/2020  | <i>Homo sapiens</i> | Asia / China / Guangdong / Shenzhen     | 2020-01-16 | Shenzhen Key Laboratory of Pathogen and Immunity, National Clinical Research Center for Infectious Disease, Shenzhen Third People's Hospital                                                                     | Shenzhen Key Laboratory of Pathogen and Immunity, National Clinical Research Center for Infectious Disease, Shenzhen Third People's Hospital                                                                               | Yang Yang, Chenguang Shen, Li Xing, Zhixiang Xu, Haixia Zheng, Yingxia Liu                                                                                                             |
| 33 | EPI_ISL_406595 | hCoV-19/Shenzhen/SZTH-004/2020  | <i>Homo sapiens</i> | Asia / China / Guangdong / Shenzhen     | 2020-01-16 | Shenzhen Key Laboratory of Pathogen and Immunity, National Clinical Research Center for Infectious Disease, Shenzhen Third People's Hospital                                                                     | Shenzhen Key Laboratory of Pathogen and Immunity, National Clinical Research Center for Infectious Disease, Shenzhen Third People's Hospital                                                                               | Yang Yang, Chenguang Shen, Li Xing, Zhixiang Xu, Haixia Zheng, Yingxia Liu                                                                                                             |
| 34 | EPI_ISL_406596 | hCoV-19/France/IDF0372/2020     | <i>Homo sapiens</i> | Europe / France / Ile-de-France / Paris | 2020-01-23 | Department of Infectious and Tropical Diseases, Bichat Claude Bernard Hospital, Paris                                                                                                                            | National Reference Center for Viruses of Respiratory Infections, Institut Pasteur, Paris                                                                                                                                   | Mélanie Albert, Marion Barbet, Sylvie Behillil, Méline Bizard, Angela Brisebarre, Flora Donati, Vincent Enouf, Maud Vanpeene, Sylvie van der Werf, Yazdan Yazdanpanah, Xavier Lescure. |
| 35 | EPI_ISL_406597 | hCoV-19/France/IDF0373/2020     | <i>Homo sapiens</i> | Europe / France / Ile-de-France / Paris | 2020-01-23 | Department of Infectious and Tropical Diseases, Bichat Claude Bernard Hospital, Paris                                                                                                                            | National Reference Center for Viruses of Respiratory Infections, Institut Pasteur, Paris                                                                                                                                   | Mélanie Albert, Marion Barbet, Sylvie Behillil, Méline Bizard, Angela Brisebarre, Flora Donati, Vincent Enouf, Maud Vanpeene, Sylvie van der Werf, Yazdan Yazdanpanah, Xavier Lescure. |
| 36 | EPI_ISL_406798 | hCoV-19/Wuhan/WH01/2019         | <i>Homo sapiens</i> | Asia / China / Hubei / Wuhan            | 2019-12-26 | General Hospital of Central Theater Command of People's Liberation Army of China                                                                                                                                 | BGI & Institute of Microbiology, Chinese Academy of Sciences & Shandong First Medical University & Shandong Academy of Medical Sciences & General Hospital of Central Theater Command of People's Liberation Army of China | Weijun Chen, Yuhai Bi, Weifeng Shi and Zhenhong Hu                                                                                                                                     |
| 37 | EPI_ISL_406801 | hCoV-19/Wuhan/WH04/2020         | <i>Homo sapiens</i> | Asia / China / Hubei / Wuhan            | 2020-01-05 | General Hospital of Central Theater Command of People's Liberation Army of China                                                                                                                                 | BGI & Institute of Microbiology, Chinese Academy of Sciences & Shandong First Medical University & Shandong Academy of Medical Sciences & General Hospital of Central Theater Command of People's Liberation Army of China | Weijun Chen, Yuhai Bi, Weifeng Shi and Zhenhong Hu                                                                                                                                     |
| 37 | EPI_ISL_411926 | hCoV-19/Taiwan/3/2020           | <i>Homo sapiens</i> | Asia / Taiwan / Taipei                  | 2020-01-24 | Taiwan Centers for Disease Control                                                                                                                                                                               | Taiwan Centers for Disease Control                                                                                                                                                                                         | Ji-Rong Yang, Yu-Chi-Lin, Jung-Jung Mu, Ming-Tsan-Liu                                                                                                                                  |
| 37 | EPI_ISL_413729 | hCoV-19/China/WF0015/2020       | <i>Homo sapiens</i> | Asia / China                            | 2020-02    | Weifang Center for Disease Control and Prevention                                                                                                                                                                | Weifang Center for Disease Control and Prevention & BGI-Shenzhen                                                                                                                                                           | Qing Nie, Xingguang Li, Erik M Volz, Han Fu, Haowei Wang, Xiaoyue Xi, Wei Chen, Dehui Liu, Yingying Chen, Mengmeng Tian, Wei Tan, Junjie Zai, Wanying Sun, Jiandong Li, Junhua Li      |
| 37 | EPI_ISL_413750 | hCoV-19/China/WF0020/2020       | <i>Homo sapiens</i> | Asia / China                            | 2020-02    | Weifang Center for Disease Control and Prevention                                                                                                                                                                | Weifang Center for Disease Control and Prevention & BGI-Shenzhen                                                                                                                                                           | Qing Nie, Xingguang Li, Erik M Volz, Han Fu, Haowei Wang, Xiaoyue Xi, Wei Chen, Dehui Liu, Yingying Chen, Mengmeng Tian, Wei Tan, Junjie Zai, Wanying Sun, Jiandong Li, Junhua Li      |
| 37 | EPI_ISL_414689 | hCoV-19/Guangzhou/GZMU0044/2020 | <i>Homo sapiens</i> | Asia / China / Guangdong / Guangzhou    | 2020-02-25 | State Key Laboratory of Respiratory Disease, National Clinical Research Center for Respiratory Disease, Guangzhou Institute of Respiratory Health, the First Affiliated Hospital of Guangzhou Medical University | The First Affiliated Hospital of Guangzhou Medical University & BGI-Shenzhen                                                                                                                                               | Zhao et al                                                                                                                                                                             |

|    |                |                                 |                     |                                          |            |                                                                                                                                                                                                                                |                                                                                                                                                                                                                                |                                                                                                                                                                       |
|----|----------------|---------------------------------|---------------------|------------------------------------------|------------|--------------------------------------------------------------------------------------------------------------------------------------------------------------------------------------------------------------------------------|--------------------------------------------------------------------------------------------------------------------------------------------------------------------------------------------------------------------------------|-----------------------------------------------------------------------------------------------------------------------------------------------------------------------|
| 37 | EPI_ISL_414690 | hCoV-19/Guangzhou/GZMU0047/2020 | <i>Homo sapiens</i> | Asia / China / Guangdong / Guangzhou     | 2020-02-25 | State Key Laboratory of Respiratory Disease, National Clinical Research Center for Respiratory Disease, Guangzhou Institute of Respiratory Health, the First Affiliated Hospital of Guangzhou Medical University               | The First Affiliated Hospital of Guangzhou Medical University & BGI-Shenzhen                                                                                                                                                   | Zhao et al                                                                                                                                                            |
| 37 | EPI_ISL_414691 | hCoV-19/Guangzhou/GZMU0048/2020 | <i>Homo sapiens</i> | Asia / China / Guangdong / Guangzhou     | 2020-02-25 | State Key Laboratory of Respiratory Disease, National Clinical Research Center for Respiratory Disease, Guangzhou Institute of Respiratory Health, the First Affiliated Hospital of Guangzhou Medical University               | The First Affiliated Hospital of Guangzhou Medical University & BGI-Shenzhen                                                                                                                                                   | Zhao et al                                                                                                                                                            |
| 37 | EPI_ISL_416042 | hCoV-19/Hangzhou/ZJU-02/2020    | <i>Homo sapiens</i> | Asia / China / Hangzhou                  | 2020-01-26 | State Key Laboratory for Diagnosis and Treatment of Infectious Diseases, National Clinical Research Center for Infectious Diseases, First Affiliated Hospital, Zhejiang University School of Medicine, Hangzhou, China. 310003 | State Key Laboratory for Diagnosis and Treatment of Infectious Diseases, National Clinical Research Center for Infectious Diseases, First Affiliated Hospital, Zhejiang University School of Medicine, Hangzhou, China. 310003 | Hangping Yao, Nanping Wu, Chao Jiang, Xiangyun Lu, Linfang Cheng, Fumin Liu, Zhigang Wu, Haibo Wu, Changzhong Jin, Min Zheng, Lanjuan Li                              |
| 37 | MT066175       | SARS-CoV-2/NTU01/2020/TWN       | <i>Homo sapiens</i> | Taiwan                                   | 2020-01-31 | not specified                                                                                                                                                                                                                  | not specified                                                                                                                                                                                                                  | Yeh,S.-H., Lin,Y.-Y., Lai,Y.-Y., Li,C.-L., Chang,S.-C., Chen,P.-J. and Chang,S.-Y.                                                                                    |
| 38 | EPI_ISL_406844 | hCoV-19/Australia/VIC01/2020    | <i>Homo sapiens</i> | Oceania / Australia / Victoria / Clayton | 2020-01-25 | Monash Medical Centre                                                                                                                                                                                                          | Collaboration between the University of Melbourne at The Peter Doherty Institute for Infection and Immunity, and the Victorian Infectious Disease Reference Laboratory                                                         | Caly,L., Seemann,T., Schultz,M., Druce,J. and Tairaoa,G                                                                                                               |
| 39 | EPI_ISL_406862 | hCoV-19/Germany/BavPat1/2020    | <i>Homo sapiens</i> | Europe / Germany / Bavaria / Munich      | 2020-01-28 | Charité Universitätsmedizin Berlin, Institute of Virology; Institut für Mikrobiologie der Bundeswehr, Munich                                                                                                                   | Charité Universitätsmedizin Berlin, Institute of Virology                                                                                                                                                                      | Victor M Corman, Julia Schneider, Talitha Veith, Barbara Mühlemann, Markus Antwerpen, Christian Drosten, Roman Wölfel                                                 |
| 40 | EPI_ISL_406970 | hCoV-19/Hangzhou/HZ-1/2020      | <i>Homo sapiens</i> | Asia / China / Zhejiang / Hangzhou       | 2020-01-20 | Hangzhou Center for Disease and Control Microbiology Lab                                                                                                                                                                       | Hangzhou Center for Disease and Control Microbiology Lab                                                                                                                                                                       | Yu Hua, Wang Haoqiu, Li Jun, Yu Xinfeng                                                                                                                               |
| 41 | EPI_ISL_406973 | hCoV-19/Singapore/1/2020        | <i>Homo sapiens</i> | Asia / Singapore                         | 2020-01-23 | Singapore General Hospital Respiratory Virus Unit, Microbiology Services Colindale, Public Health England                                                                                                                      | National Public Health Laboratory                                                                                                                                                                                              | Mak, TM; Octavia S; Chavatte JM; Zhou, ZY; Cui, L; Lin, RTP                                                                                                           |
| 42 | EPI_ISL_407073 | hCoV-19/England/02/2020         | <i>Homo sapiens</i> | Europe / United Kingdom / England        | 2020-01-29 | Respiratory Virus Unit, Microbiology Services Colindale, Public Health England                                                                                                                                                 | Respiratory Virus Unit, Microbiology Services Colindale, Public Health England                                                                                                                                                 | Monica Galiano, Shahjahan Miah, Richard Myers, Angie Lackenby, Omolola Akinbami, Tiina Talts, Leena Bhaw, Kirstin Edwards, Jonathan Hubb, Joanna Ellis, Maria Zambon. |
| 43 | EPI_ISL_407193 | hCoV-19/South Korea/KCDC03/2020 | <i>Homo sapiens</i> | Asia / South Korea / Gyeonggi-do         | 2020-01-25 | Korea Centers for Disease Control & Prevention (KCDC) Center for Laboratory Control of Infectious Diseases Division of Viral Diseases                                                                                          | Korea Centers for Disease Control & Prevention (KCDC) Center for Laboratory Control of Infectious Diseases Division of Viral Diseases                                                                                          | Jeong-Min Kim, Yoon-Seok Chung, Namjoo Lee, Mi-Seon Kim, SangHee Woo, Hye-Joon Jo, Sehee Park, Heui Man Kim, Myung Guk Han                                            |
| 44 | EPI_ISL_407313 | hCoV-19/Hangzhou/HZCDC0001/2020 | <i>Homo sapiens</i> | Asia / China / Zhejiang / Hangzhou       | 2020-01-19 | Hangzhou Center for Disease Control and Prevention                                                                                                                                                                             | Hangzhou Center for Disease Control and Prevention                                                                                                                                                                             | Jun Li, Haoqiu Wang, Hua Yu, Lingfeng Mao, Xinfen Yu, Zhou Sun, Qingxin Kong, Xin Qian, Shuchang Chen, Xuchu Wang                                                     |



|    |                |                                |                     |                                                |            |                                                                                       |                                                                                                                                                                                         |                                                                                                                                                                                                                                                                                                                                                                                              |
|----|----------------|--------------------------------|---------------------|------------------------------------------------|------------|---------------------------------------------------------------------------------------|-----------------------------------------------------------------------------------------------------------------------------------------------------------------------------------------|----------------------------------------------------------------------------------------------------------------------------------------------------------------------------------------------------------------------------------------------------------------------------------------------------------------------------------------------------------------------------------------------|
| 44 | EPI_ISL_416404 | hCoV-19/Shanghai/SH0119/2020   | <i>Homo sapiens</i> | Asia / China / Shanghai                        | 2020-02-09 | Shanghai Public Health Clinical Center, Shanghai Medical College, Fudan University    | National Research Center for Translational Medicine (Shanghai), Ruijin Hospital affiliated to Shanghai Jiao Tong University School of Medicine & Shanghai Public Health Clinical Center | Shengyue Wang, Xiaonan Zhang, Gang Lu, Yun Tan, Yun Ling, Hongzhou Lu, Saijuan Chen                                                                                                                                                                                                                                                                                                          |
| 45 | EPI_ISL_407893 | hCoV-19/Australia/NSW01/2020   | <i>Homo sapiens</i> | Oceania / Australia / New South Wales / Sydney | 2020-01-24 | Centre for Infectious Diseases and Microbiology Laboratory Services                   | NSW Health Pathology - Institute of Clinical Pathology and Medical Research; Westmead Hospital; University of Sydney                                                                    | Eden J-S, Carter I, Rahman H, Holmes EC, Rockett R, O'Sullivan MV, Sintchenko V, Chen SC, Maddocks S, Kok J and Dwyer DE for the 2019-nCoV Study Group                                                                                                                                                                                                                                       |
| 46 | EPI_ISL_407894 | hCoV-19/Australia/QLD01/2020   | <i>Homo sapiens</i> | Oceania / Australia / Queensland / Gold Coast  | 2020-01-28 | Pathology Queensland                                                                  | Public Health Virology Laboratory                                                                                                                                                       | Ben Huang, Alyssa Pyke, Amanda De Jong, Andrew Van Den Hurk, Carmel Taylor, David Warrilow, Doris Genge, Elisabeth Gamez, Glen Hewitson, Ian Maxwell Mackay, Inga Sultana, Jamie McMahon, Jean Barcelon, Judy Northill, Mitchell Finger, Natalie Simpson, Neelima Nair, Peter Burtonclay, Peter Moore, Sarah Wheatley, Sean Moody, Sonja Hall-Mendelin, Timothy Gardam, and Frederick Moore. |
| 47 | EPI_ISL_407896 | hCoV-19/Australia/QLD02/2020   | <i>Homo sapiens</i> | Oceania / Australia / Queensland / Gold Coast  | 2020-01-30 | Pathology Queensland                                                                  | Public Health Virology Laboratory                                                                                                                                                       | Ben Huang, Alyssa Pyke, Amanda De Jong, Andrew Van Den Hurk, Carmel Taylor, David Warrilow, Doris Genge, Elisabeth Gamez, Glen Hewitson, Ian Maxwell Mackay, Inga Sultana, Jamie McMahon, Jean Barcelon, Judy Northill, Mitchell Finger, Natalie Simpson, Neelima Nair, Peter Burtonclay, Peter Moore, Sarah Wheatley, Sean Moody, Sonja Hall-Mendelin, Timothy Gardam, and Frederick Moore. |
| 48 | EPI_ISL_407976 | hCoV-19/Belgium/GHB-03021/2020 | <i>Homo sapiens</i> | Europe / Belgium / Leuven                      | 2020-02-03 | KU Leuven, Clinical and Epidemiological Virology                                      | KU Leuven, Clinical and Epidemiological Virology                                                                                                                                        | Bert Vanmechelen, Elke Wollants, Annabel Rector, Els Keyaerts, Lies Laenen, Marc Van Ranst, and Piet Maes                                                                                                                                                                                                                                                                                    |
| 49 | EPI_ISL_407987 | hCoV-19/Singapore/2/2020       | <i>Homo sapiens</i> | Asia / Singapore                               | 2020-01-25 | Singapore General Hospital                                                            | Programme in Emerging Infectious Diseases, Duke-NUS Medical School                                                                                                                      | Danielle E Anderson, Martin Linster, Yan Zhuang, Jayanthi Jayakumar, Kian Sing Chan, Lynette LE Oon, Jenny GH Low, Yvonne CF Su, Linfa Wang, Gavin JD Smith                                                                                                                                                                                                                                  |
| 49 | EPI_ISL_410537 | hCoV-19/Singapore/6/2020       | <i>Homo sapiens</i> | Asia / Singapore                               | 2020-02-09 | Singapore General Hospital, Molecular Laboratory, Division of Pathology               | Programme in Emerging Infectious Diseases, Duke-NUS Medical School                                                                                                                      | Danielle E Anderson, Martin Linster, Yan Zhuang, Jayanthi Jayakumar, Kian Sing Chan, Lynette LE Oon, Shirin Kalimuddin, Jenny GH Low, Yvonne CF Su, Gavin JD Smith                                                                                                                                                                                                                           |
| 50 | EPI_ISL_407988 | hCoV-19/Singapore/3/2020       | <i>Homo sapiens</i> | Asia / Singapore                               | 2020-02-01 | National Centre for Infectious Diseases                                               | Programme in Emerging Infectious Diseases, Duke-NUS Medical School                                                                                                                      | Danielle E Anderson, Martin Linster, Yan Zhuang, Jayanthi Jayakumar, David CB Lye, Yee Sin Leo, Barnaby E Young, Yvonne CF Su, Linfa Wang, Gavin JD Smith                                                                                                                                                                                                                                    |
| 51 | EPI_ISL_408008 | hCoV-19/USA/CA3/2020           | <i>Homo sapiens</i> | North America / USA / California               | 2020-01-29 | California Department of Health                                                       | Pathogen Discovery, Respiratory Viruses Branch, Division of Viral Diseases, Centers for Disease Control and Prevention                                                                  | Krista Queen, Jing Zhang, Yan Li, Ying Tao, Anna Uehara, Clinton Paden, Xiaoyan Lu, Brian Lynch, Senthil Kumar K. Sakthivel, Brett L. Whitaker, Shifaq Kamili, Lijuan Wang, Janna' R. Murray, Susan I. Gerber, Stephen Lindstrom, Suxiang Tong                                                                                                                                               |
| 51 | EPI_ISL_408009 | hCoV-19/USA/CA4/2020           | <i>Homo sapiens</i> | North America / USA / California               | 2020-01-29 | California Department of Health                                                       | Pathogen Discovery, Respiratory Viruses Branch, Division of Viral Diseases, Centers for Dieases Control and Prevention                                                                  | Krista Queen, Jing Zhang, Yan Li, Ying Tao, Anna Uehara, Clinton Paden, Xiaoyan Lu, Brian Lynch, Senthil Kumar K. Sakthivel, Brett L. Whitaker, Shifaq Kamili, Lijuan Wang, Janna' R. Murray, Susan I. Gerber, Stephen Lindstrom, Suxiang Tong                                                                                                                                               |
| 51 | MT027063       | 2019-nCoV/USA-CA4/2020         | <i>Homo sapiens</i> | USA: CA                                        | 2020-01-29 | not specified                                                                         | not specified                                                                                                                                                                           | Queen,K., Zhang,J., Li,Y., Tao,Y., Uehara,A., Paden,C.R., Lu,X., Lynch,B., Sakthivel,S.K.K., Whitaker,B.L., Kamili,S., Wang,L., Murray,J.R., Gerber,S.I., Lindstrom,S. and Tong,S.                                                                                                                                                                                                           |
| 52 | EPI_ISL_408010 | hCoV-19/USA/CA5/2020           | <i>Homo sapiens</i> | North America / USA / California               | 2020-01-29 | California Department of Health                                                       | Pathogen Discovery, Respiratory Viruses Branch, Division of Viral Diseases, Centers for Dieases Control and Prevention                                                                  | Ying Tao, Krista Queen, Jing Zhang, Yan Li, Anna Uehara, Clinton Paden, Xiaoyan Lu, Brian Lynch, Senthil Kumar K. Sakthivel, Brett L. Whitaker, Shifaq Kamili, Lijuan Wang, Janna' R. Murray, Susan I. Gerber, Stephen Lindstrom, Suxiang Tong                                                                                                                                               |
| 53 | EPI_ISL_408430 | hCoV-19/France/IDF0515/2020    | <i>Homo sapiens</i> | Europe / France / Ile-de-France / Paris        | 2020-01-29 | Department of Infectious and Tropical Diseases, Bichat Claude Bernard Hospital, Paris | National Reference Center for Viruses of Respiratory Infections, Institut Pasteur, Paris                                                                                                | Mélanie Albert, Marion Barbet, Sylvie Behillil, Méline Bizard, Angela Brisebarre, Flora Donati, Vincent Enouf, Maud Vanpeene, Sylvie van der Werf, Yazdan Yazdanpanah, Xavier Lescure                                                                                                                                                                                                        |

|    |                |                                      |                     |                                         |            |                                                                                          |                                                                                                                        |                                                                                                                                                                                                                                                                                             |
|----|----------------|--------------------------------------|---------------------|-----------------------------------------|------------|------------------------------------------------------------------------------------------|------------------------------------------------------------------------------------------------------------------------|---------------------------------------------------------------------------------------------------------------------------------------------------------------------------------------------------------------------------------------------------------------------------------------------|
| 54 | EPI_ISL_408431 | hCoV-19/France/IDF0626/2020          | <i>Homo sapiens</i> | Europe / France / Ile-de-France / Paris | 2020-01-29 | Sorbonne Université, Inserm et Assistance Publique-Hôpitaux de Paris (Pitié Salpêtrière) | National Reference Center for Viruses of Respiratory Infections, Institut Pasteur, Paris                               | Mélanie Albert, Marion Barbet, Sylvie Behillil, Méline Bizard, Angela Brisebarre, Flora Donati, Vincent Enouf, Maud Vanpeene, Sylvie van der Werf, Sonia Burrel, Anne-Geneviève Marcelin, Vincent Calvez, David Boutolleau, Elise Klément, Valérie Pouchier, Eric Caumes.                   |
| 55 | EPI_ISL_408478 | hCoV-19/Chongqing/YC01/2020          | <i>Homo sapiens</i> | Asia / China / Chongqing / Yongchuan    | 2020-01-21 | Yongchuan District Center for Disease Control and Prevention                             | Chongqing Municipal Center for Disease Control and Prevention                                                          | Ye Sheng, Tang Yun, Ling Hua, Yu zhen, Chen Shuang, Tan ZhangPing, Su Kun, Li Qing, Tang Wenge, Rong Rong                                                                                                                                                                                   |
| 56 | EPI_ISL_408480 | hCoV-19/Yunnan/IVDC-YN-003/2020      | <i>Homo sapiens</i> | Asia / China / Yunnan / Kunming         | 2020-01-17 | National Institute for Viral Disease Control and Prevention, China CDC                   | National Institute for Viral Disease Control & Prevention, CCDC                                                        | Wenjie Tan, Xiaoqing Fu, Xiang Zhao, Wenling Wang, Peihua Niu, Roujian Lu, Yanhong Sun, Baoying Huang, Li Zhao, Fei Ye, Wenbo Xu, George F. Gao, Guizhen Wu                                                                                                                                 |
| 57 | EPI_ISL_408481 | hCoV-19/Chongqing/IVDC-CQ-001/2020   | <i>Homo sapiens</i> | Asia / China / Chongqing                | 2020-01-18 | National Institute for Viral Disease Control and Prevention, China CDC                   | National Institute for Viral Disease Control & Prevention, CCDC                                                        | Wenjie Tan, Hengqin Wang, Xiang Zhao, Wenling Wang, Peihua Niu, Roujian Lu, Sheng Ye, Baoying Huang, Li Zhao, Fei Ye, Wenbo Xu, George F. Gao, Guizhen Wu                                                                                                                                   |
| 57 | EPI_ISL_412968 | hCoV-19/Japan/Hu_DP_Kng_19-020/2020  | <i>Homo sapiens</i> | Asia / Japan                            | 2020-02-10 | unknown                                                                                  | Takayuki Hishiki Kanagawa Prefectural Institute of Public Health, Department of Microbiology                           | Hishiki,T., Suzuki,R., Sakuragi,J., Usui,K., Tanaka,Y., Kawai,J., Kogo,Y., Matsuki,Y., An,T., Hayashizaki,Y. and Takasaki,T.                                                                                                                                                                |
| 57 | EPI_ISL_414484 | hCoV-19/USA/CruiseA-25/2020          | <i>Homo sapiens</i> | North America / USA                     | 2020-02-17 | unknown                                                                                  | Pathogen Discovery, Respiratory Viruses Branch, Division of Viral Diseases, Centers for Disease Control and Prevention | Krista Queen, Anna Uehara, Ying Tao, Clinton R. Paden, Jing Zhang, Yan Li, Haibin Wang, Shifaq Kamili, Xiaoyan Lu, Brian Lynch, Senthil Kumar K. Sakthivel, Brett L. Whitaker, Lijuan Wang, Janna' R. Murray, Jasmine Padilla, Justin Lee, Susan I. Gerber, Stephen Lindstrom, Suxiang Tong |
| 57 | EPI_ISL_416574 | hCoV-19/Japan/DP0107/2020            | <i>Homo sapiens</i> | Asia / Japan / unknown                  | 2020-02-15 | Japanese Quarantine Stations                                                             | Pathogen Genomics Center, National Institute of Infectious Diseases                                                    | Tsuyoshi Sekizuka, Kentaro Itokawa, Rina Tanaka, Masanori Hashino, Tsutomu Kageyama, Shinji Saito, Ikuyo Takayama, Hideki Hasegawa, Takuri Takahashi, Hajime Kamiya, Takuya Yamagishi, Motoi Suzuki, Takaji Wakita, Makoto Kuroda                                                           |
| 57 | EPI_ISL_416577 | hCoV-19/Japan/DP0134/2020            | <i>Homo sapiens</i> | Asia / Japan / unknown                  | 2020-02-15 | Japanese Quarantine Stations                                                             | Pathogen Genomics Center, National Institute of Infectious Diseases                                                    | Tsuyoshi Sekizuka, Kentaro Itokawa, Rina Tanaka, Masanori Hashino, Tsutomu Kageyama, Shinji Saito, Ikuyo Takayama, Hideki Hasegawa, Takuri Takahashi, Hajime Kamiya, Takuya Yamagishi, Motoi Suzuki, Takaji Wakita, Makoto Kuroda                                                           |
| 58 | EPI_ISL_408482 | hCoV-19/Shandong/IVDC-SD-001/2020    | <i>Homo sapiens</i> | Asia / China / Shandong / Qingdao       | 2020-01-19 | National Institute for Viral Disease Control and Prevention, China CDC                   | National Institute for Viral Disease Control & Prevention, CCDC                                                        | Wenjie Tan, Zhaoguo Wang, Xiang Zhao, Wenling Wang, Peihua Niu, Roujian Lu, Ti Liu, Baoying Huang, Li Zhao, Fei Ye, Wenbo Xu, George F. Gao, Guizhen Wu                                                                                                                                     |
| 59 | EPI_ISL_408484 | hCoV-19/Sichuan/IVDC-SC-001/2020     | <i>Homo sapiens</i> | Asia / China / Sichuan / Chengdu        | 2020-01-15 | National Institute for Viral Disease Control and Prevention, China CDC                   | National Institute for Viral Disease Control & Prevention, CCDC                                                        | Wenjie Tan, Jianan Xu, Wenling Wang, Peihua Niu, Roujian Lu, Huiping Yang, Xiang Zhao, Baoying Huang, Li Zhao, Fei Ye, Wenbo Xu, George F. Gao, Guizhen Wu                                                                                                                                  |
| 60 | EPI_ISL_408485 | hCoV-19/Beijing/IVDC-BJ-005/2020     | <i>Homo sapiens</i> | Asia / China / Beijing                  | 2020-01-18 | National Institute for Viral Disease Control and Prevention, China CDC                   | National Institute for Viral Disease Control & Prevention, CCDC                                                        | Wenjie Tan, Quanyi Wang, Wenling Wang, Peihua Niu, Roujian Lu, Yang Pan, Xiang Zhao, Baoying Huang, Li Zhao, Fei Ye, Wenbo Xu, George F. Gao, Guizhen Wu                                                                                                                                    |
| 61 | EPI_ISL_408486 | hCoV-19/Jiangxi/IVDC-JX-002/2020     | <i>Homo sapiens</i> | Asia / China / Jiangxi / Pingxiang      | 2020-01-11 | National Institute for Viral Disease Control and Prevention, China CDC                   | National Institute for Viral Disease Control & Prevention, CCDC                                                        | Wenjie Tan, Yong Shi, Wenling Wang, Peihua Niu, Roujian Lu, Jianxiong Li, Xiang Zhao, Baoying Huang, Li Zhao, Fei Ye, Wenbo Xu, George F. Gao, Guizhen Wu                                                                                                                                   |
| 62 | EPI_ISL_408488 | hCoV-19/Jiangsu/IVDC-JS-001/2020     | <i>Homo sapiens</i> | Asia / China / Jiangsu / Huaian         | 2020-01-19 | National Institute for Viral Disease Control and Prevention, China CDC                   | National Institute for Viral Disease Control & Prevention, CCDC                                                        | Wenjie Tan, Shenjiao Wang, Wenling Wang, Peihua Niu, Roujian Lu, Kangchen Zhao, Xiang Zhao, Baoying Huang, Li Zhao, Fei Ye, Wenbo Xu, George F. Gao, Guizhen Wu                                                                                                                             |
| 63 | EPI_ISL_408514 | hCoV-19/Wuhan/IVDC-HB-envF13-20/2020 | Environment         | Asia / China / Hubei / Wuhan            | 2020-01-01 | Institute of Viral Disease Control and Prevention, China CDC                             | Institute of Viral Disease Control and Prevention, China CDC                                                           | William J. Liu, Peipei Liu, Xiang Zhao, Peihua Niu, Yingze Zhao, Wenwen Lei, Ziqian Xu, Shumei Zou, Wei Zhen, Beiwei Ye, Mengjie Yang, Weifeng Shi, Roujian Lu, Wenjie Tan, Zhixiao Chen, Yuchao Wu, Juan Song, Weimin Zhou, Dayan Wang, Jun Han, Wenbo Xu, George F. Gao, Guizhen Wu       |
| 64 | EPI_ISL_408515 | hCoV-19/Wuhan/IVDC-HB-envF13-21/2020 | Environment         | Asia / China / Hubei / Wuhan            | 2020-01-01 | Institute of Viral Disease Control and Prevention, China CDC                             | Institute of Viral Disease Control and Prevention, China CDC                                                           | William J. Liu, Peipei Liu, Xiang Zhao, Peihua Niu, Yingze Zhao, Wenwen Lei, Ziqian Xu, Shumei Zou, Wei Zhen, Beiwei Ye, Mengjie Yang, Weifeng Shi, Roujian Lu, Wenjie Tan, Zhixiao Chen, Yuchao Wu, Juan Song, Weimin Zhou, Dayan Wang, Jun Han, Wenbo Xu, George F. Gao, Guizhen Wu       |

|    |                |                                 |                     |                                                |            |                                                                                                                                                    |                                                                                                                                                                                           |                                                                                                                                                                                                                                                                                                                                                                                              |
|----|----------------|---------------------------------|---------------------|------------------------------------------------|------------|----------------------------------------------------------------------------------------------------------------------------------------------------|-------------------------------------------------------------------------------------------------------------------------------------------------------------------------------------------|----------------------------------------------------------------------------------------------------------------------------------------------------------------------------------------------------------------------------------------------------------------------------------------------------------------------------------------------------------------------------------------------|
| 65 | EPI_ISL_408665 | hCoV-19/Japan/TY-WK-012/2020    | <i>Homo sapiens</i> | Asia / Japan / Tokyo                           | 2020-01-29 | Dept. of Virology III, National Institute of Infectious Diseases                                                                                   | Pathogen Genomics Center, National Institute of Infectious Diseases                                                                                                                       | Tsuyoshi Sekizuka, Shutoku Matsuyama, Naganori Nao, Kazuya Shirato, Makoto Takeda, Makoto Kuroda                                                                                                                                                                                                                                                                                             |
| 66 | EPI_ISL_408666 | hCoV-19/Japan/TY-WK-501/2020    | <i>Homo sapiens</i> | Asia / Japan / Tokyo                           | 2020-01-31 | Dept. of Virology III, National Institute of Infectious Diseases                                                                                   | Pathogen Genomics Center, National Institute of Infectious Diseases                                                                                                                       | Tsuyoshi Sekizuka, Shutoku Matsuyama, Naganori Nao, Kazuya Shirato, Makoto Takeda, Makoto Kuroda                                                                                                                                                                                                                                                                                             |
| 67 | EPI_ISL_408667 | hCoV-19/Japan/TY-WK-521/2020    | <i>Homo sapiens</i> | Asia / Japan / Tokyo                           | 2020-01-31 | Dept. of Virology III, National Institute of Infectious Diseases                                                                                   | Pathogen Genomics Center, National Institute of Infectious Diseases                                                                                                                       | Tsuyoshi Sekizuka, Shutoku Matsuyama, Naganori Nao, Kazuya Shirato, Makoto Takeda, Makoto Kuroda                                                                                                                                                                                                                                                                                             |
| 68 | EPI_ISL_408668 | hCoV-19/Vietnam/VR03-38142/2020 | <i>Homo sapiens</i> | Asia / Vietnam / Thanh Hoa                     | 2020-01-24 | National Influenza Center - National Institute of Hygiene and Epidemiology (NIHE)                                                                  | National Influenza Center - National Institute of Hygiene and Epidemiology (NIHE)                                                                                                         | Ung Thi Hong Trang, Hoang Vu Mai Phuong, Nguyen Le Khanh Hang, Nguyen Vu Son, Le Thi Thanh, Vuong Duc Cuong, Nguyen Phuong Anh, Pham Thi Hien, Tran Thu Huong, Le Thi Quynh Mai,                                                                                                                                                                                                             |
| 69 | EPI_ISL_408669 | hCoV-19/Japan/KY-V-029/2020     | <i>Homo sapiens</i> | Asia / Japan / Kyoto                           | 2020-01-29 | Dept. of Virology III, National Institute of Infectious Diseases                                                                                   | Pathogen Genomics Center, National Institute of Infectious Diseases                                                                                                                       | Tsuyoshi Sekizuka, Shutoku Matsuyama, Naganori Nao, Kazuya Shirato, Makoto Takeda, Makoto Kuroda                                                                                                                                                                                                                                                                                             |
| 70 | EPI_ISL_408977 | hCoV-19/Australia/NSW03/2020    | <i>Homo sapiens</i> | Oceania / Australia / New South Wales / Sydney | 2020-01-25 | Serology, Virology and OTDS Laboratories (SAViD), NSW Health Pathology Randwick                                                                    | NSW Health Pathology - Institute of Clinical Pathology and Medical Research; Centre for Infectious Diseases and Microbiology Laboratory Services; Westmead Hospital; University of Sydney | Eden J-S, Carter I, Rahman H, Rawlinson W, Holmes EC, Rockett R, O'Sullivan MV, Sintchenko V, Chen SC, Maddocks S, Kok J and Dwyer DE for the 2019-nCoV Study Group*                                                                                                                                                                                                                         |
| 71 | EPI_ISL_410045 | hCoV-19/USA/IL2/2020            | <i>Homo sapiens</i> | North America / USA / Illinois                 | 2020-01-28 | IL Department of Public Health Chicago Laboratory                                                                                                  | Pathogen Discovery, Respiratory Viruses Branch, Division of Viral Diseases, Centers for Diseases Control and Prevention                                                                   | Yan Li, Jing Zhang, Krista Queen, Ying Tao, Anna Uehara, Clinton R. Paden, Xiaoyan Lu, Brian Lynch, Senthil Kumar K. Sakthivel, Brett L. Whitaker, Shifaq Kamili, Lijuan Wang, Janna' R. Murray, Susan I. Gerber, Stephen Lindstrom, Suxiang Tong                                                                                                                                            |
| 72 | EPI_ISL_410218 | hCoV-19/Taiwan/NTU02/2020       | <i>Homo sapiens</i> | Asia / Taiwan / Taipei                         | 2020-02-05 | Department of Laboratory Medicine, National Taiwan University Hospital                                                                             | Microbial Genomics Core Lab, National Taiwan University Centers of Genomic and Precision Medicine                                                                                         | Shiou-Hwei Yeh, You-Yu Lin, Ya-Yun Lai, Chiao-Ling Li, Shan-Chwen Chang, Pei-Jer Chen, Sui-Yuan Chang                                                                                                                                                                                                                                                                                        |
| 73 | EPI_ISL_410301 | hCoV-19/Nepal/61/2020           | <i>Homo sapiens</i> | Asia / Nepal / Kathmandu                       | 2020-01-13 | National Influenza Centre, National Public Health Laboratory, Kathmandu, Nepal                                                                     | The University of Hong Kong                                                                                                                                                               | Ranjit Sah , Runa Jha, Daniel Chu, Haoguo Gu, Malik Peiris, Anup Bastola, Alfonso J. Rodriguez-Morales, Bibek Kumar Lal, Basu Dev Pandey, Leo Poon                                                                                                                                                                                                                                           |
| 74 | EPI_ISL_410536 | hCoV-19/Singapore/5/2020        | <i>Homo sapiens</i> | Asia / Singapore                               | 2020-02-06 | Singapore General Hospital, Molecular Laboratory, Division of Pathology National Public Health Laboratory, National Centre for Infectious Diseases | Programme in Emerging Infectious Diseases, Duke-NUS Medical School                                                                                                                        | Danielle E Anderson, Martin Linster, Yan Zhuang, Jayanthi Jayakumar, Kian Sing Chan, Lynette LE Oon, Shirin Kalimuddin, Jenny GH Low, Yvonne CF Su, Gavin JD Smith                                                                                                                                                                                                                           |
| 75 | EPI_ISL_410713 | hCoV-19/Singapore/7/2020        | <i>Homo sapiens</i> | Asia / Singapore                               | 2020-01-27 | National Public Health Laboratory, National Centre for Infectious Diseases                                                                         | National Public Health Laboratory, National Centre for Infectious Diseases                                                                                                                | Octavia S, Mak TM, Cui L, Lin RTP                                                                                                                                                                                                                                                                                                                                                            |
| 76 | EPI_ISL_410715 | hCoV-19/Singapore/9/2020        | <i>Homo sapiens</i> | Asia / Singapore                               | 2020-02-04 | National Public Health Laboratory, National Centre for Infectious Diseases                                                                         | National Public Health Laboratory, National Centre for Infectious Diseases                                                                                                                | Octavia S, Mak TM, Cui L, Lin RTP                                                                                                                                                                                                                                                                                                                                                            |
| 76 | EPI_ISL_410716 | hCoV-19/Singapore/10/2020       | <i>Homo sapiens</i> | Asia / Singapore                               | 2020-02-04 | National Public Health Laboratory, National Centre for Infectious Diseases                                                                         | National Centre for Infectious Diseases, National Centre for Infectious Diseases                                                                                                          | Octavia S, Mak TM, Cui L, Lin RTP                                                                                                                                                                                                                                                                                                                                                            |
| 77 | EPI_ISL_410717 | hCoV-19/Australia/QLD03/2020    | <i>Homo sapiens</i> | Oceania / Australia / Queensland / Gold Coast  | 2020-02-05 | Pathology Queensland                                                                                                                               | Public Health Virology Laboratory                                                                                                                                                         | Ben Huang, Alyssa Pyke, Amanda De Jong, Andrew Van Den Hurk, Carmel Taylor, David Warrilow, Doris Genge, Elisabeth Gamez, Glen Hewitson, Ian Maxwell Mackay, Inga Sultana, Jamie McMahon, Jean Barcelon, Judy Northill, Mitchell Finger, Natalie Simpson, Neelima Nair, Peter Burtonclay, Peter Moore, Sarah Wheatley, Sean Moody, Sonja Hall-Mendelin, Timothy Gardam, and Frederick Moore. |

|    |                |                                         |                     |                                               |            |                                                                                                                   |                                                                                                                                                                                                                                                  |                                                                                                                                                                                                                                                                                                                                                                                                                                                |
|----|----------------|-----------------------------------------|---------------------|-----------------------------------------------|------------|-------------------------------------------------------------------------------------------------------------------|--------------------------------------------------------------------------------------------------------------------------------------------------------------------------------------------------------------------------------------------------|------------------------------------------------------------------------------------------------------------------------------------------------------------------------------------------------------------------------------------------------------------------------------------------------------------------------------------------------------------------------------------------------------------------------------------------------|
| 78 | EPI_ISL_410718 | hCoV-19/Australia/QLD04/2020            | <i>Homo sapiens</i> | Oceania / Australia / Queensland / Gold Coast | 2020-02-05 | Pathology Queensland                                                                                              | Public Health Virology Laboratory                                                                                                                                                                                                                | Ben Huang, Alyssa Pyke, Amanda De Jong, Andrew Van Den Hurk, Carmel Taylor, David Warrillow, Doris Genge, Elisabeth Gamez, Glen Hewitson, Ian Maxwell Mackay, Inga Sultana, Jamie McMahon, Jean Barcelon, Judy Northill, Mitchell Finger, Natalie Simpson, Neelima Nair, Peter Burtonclay, Peter Moore, Sarah Wheatley, Sean Moody, Sonja Hall-Mendelin, Timothy Gardam, and Frederick Moore.                                                  |
| 78 | EPI_ISL_411954 | hCoV-19/USA/CA7/2020                    | <i>Homo sapiens</i> | North America / USA / California              | 2020-02-06 | California Department of Public Health                                                                            | Pathogen Discovery, Respiratory Viruses Branch, Division of Viral Diseases, Centers for Diseases Control and Prevention                                                                                                                          | Krista Queen, Anna Uehara, Jing Zhang, Yan Li, Ying Tao, Clinton R. Paden, Haibin Wang, Shifaq Kamili, Xiaoyan Lu, Brian Lynch, Senthil Kumar K. Saktivel, Brett L. Whitaker, Lijuan Wang, Janna' R. Murray, Susan I. Gerber, Stephen Lindstrom, Suxiang Tong                                                                                                                                                                                  |
| 78 | EPI_ISL_413853 | hCoV-19/Guangdong/2020XN4243-P0035/2020 | <i>Homo sapiens</i> | Asia / China / Guangdong                      | 2020-01-30 | Guangdong Provincial Institution of Public Health, Guangdong Provincial Center for Disease Control and Prevention | Guangdong Provincial Institution of Public Health                                                                                                                                                                                                | Jing Lu, Louis du Plessis, Liu Zhe, Jiufeng Sun, Sarah François, Huifang Lin, Moritz Kraemer, Jingju Peng, Qianlin Xiong, Runyu Yuan, Lilian Zeng, Pingping Zhou, Chuming Liang, Tao Liu, Wei Li, Juan Su, Huanying Zheng, Kang Min, Song Tie, Bo Peng, Shisong Fang, Wenzhe Su, Kuibiao Li, Ruilin Sun, Ru bai, Xi Tang, Minfeng Liang, Nuno Faria, Josh Quick, Andrew Rambaut, Verity Hill, Wenjun Ma, Nick Loman, Oliver Pybus, Changwen Ke |
| 79 | EPI_ISL_410719 | hCoV-19/Singapore/11/2020               | <i>Homo sapiens</i> | Asia / Singapore                              | 2020-02-02 | National Public Health Laboratory                                                                                 | National Public Health Laboratory                                                                                                                                                                                                                | Octavia S, Mak TM, Cui L, Lin RTP                                                                                                                                                                                                                                                                                                                                                                                                              |
| 80 | EPI_ISL_410720 | hCoV-19/France/IDF0372-isl/2020         | <i>Homo sapiens</i> | Europe / France / Ile-de-France / Paris       | 2020-01-23 | Department of Infectious and Tropical Diseases, Bichat Claude Bernard Hospital, Paris                             | National Reference Center for Viruses of Respiratory Infections, Institut Pasteur, Paris                                                                                                                                                         | Mélanie Albert, Marion Barbet, Sylvie Behillil, Méline Bizard, Angela Brisebarre, Flora Donati, Vincent Enouf, Maud Vanpeene, Sylvie van der Werf, Yazdan Yazdanpanah, Xavier Lescure.                                                                                                                                                                                                                                                         |
| 80 | EPI_ISL_411219 | hCoV-19/France/IDF0386-islP1/2020       | <i>Homo sapiens</i> | Europe / France / Ile-de-France / Paris       | 2020-01-28 | Department of Infectious and Tropical Diseases, Bichat Claude Bernard Hospital, Paris                             | Laboratoire Virpath, CIRI U111, UCBL1, INSERM, CNRS, ENS Lyon                                                                                                                                                                                    | Olivier Terrier, Aurélien Traversier, Julien Fouret, Yazdan Yazdanpanah, Xavier Lescure, Alexandre Gaymard, Bruno Lina, Manuel Rosa-Calatrava                                                                                                                                                                                                                                                                                                  |
| 80 | EPI_ISL_411220 | hCoV-19/France/IDF0386-islP3/2020       | <i>Homo sapiens</i> | Europe / France / Ile-de-France / Paris       | 2020-01-28 | Department of Infectious and Tropical Diseases, Bichat Claude Bernard Hospital, Paris                             | Laboratoire Virpath, CIRI U111, UCBL1, INSERM, CNRS, ENS Lyon                                                                                                                                                                                    | Olivier Terrier, Aurélien Traversier, Julien Fouret, Yazdan Yazdanpanah, Xavier Lescure, Alexandre Gaymard, Bruno Lina, Manuel Rosa-Calatrava                                                                                                                                                                                                                                                                                                  |
| 81 | EPI_ISL_410984 | hCoV-19/France/IDF0515-isl/2020         | <i>Homo sapiens</i> | Europe / France / Ile-de-France / Paris       | 2020-01-29 | Department of Infectious and Tropical Diseases, Bichat Claude Bernard Hospital, Paris                             | National Reference Center for Viruses of Respiratory Infections, Institut Pasteur, Paris                                                                                                                                                         | Mélanie Albert, Marion Barbet, Sylvie Behillil, Méline Bizard, Angela Brisebarre, Flora Donati, Vincent Enouf, Maud Vanpeene, Sylvie van der Werf, Yazdan Yazdanpanah, Xavier Lescure                                                                                                                                                                                                                                                          |
| 81 | EPI_ISL_411218 | hCoV-19/France/IDF0571/2020             | <i>Homo sapiens</i> | Europe / France / Ile-de-France / Paris       | 2020-02-02 | Department of Infectious and Tropical Diseases, Bichat Claude Bernard Hospital, Paris                             | Laboratoire Virpath, CIRI U111, UCBL1, INSERM, CNRS, ENS Lyon                                                                                                                                                                                    | Olivier Terrier, Aurélien Traversier, Julien Fouret, Yazdan Yazdanpanah, Xavier Lescure, Catherine Legras-Lachuer, Alexandre Gaymard, Bruno Lina, Manuel Rosa-Calatrava                                                                                                                                                                                                                                                                        |
| 82 | EPI_ISL_411066 | hCoV-19/Fujian/13/2020                  | <i>Homo sapiens</i> | Asia / China / Fujian                         | 2020-01-22 | Fujian Center for Disease Control and Prevention                                                                  | Fujian Center for Disease Control and Prevention                                                                                                                                                                                                 | Chen Wei, Zhang Yanhua, He Wenxiang, Weng Yuwei                                                                                                                                                                                                                                                                                                                                                                                                |
| 83 | EPI_ISL_411902 | hCoV-19/Cambodia/0012/2020              | <i>Homo sapiens</i> | Asia / Cambodia / Sihanoukville               | 2020-01-27 | Virology Unit, Institut Pasteur du Cambodge.                                                                      | Virology Unit, Institut Pasteur du Cambodge (Sequencing done by: Jessica E Manning/Jennifer A Bohl at Malaria and Vector Research Laboratory, National Institute of Allergy and Infectious Diseases and Vida Ahyong from Chan-Zuckerberg Biohub) | Erik A Karlsson, Jennifer A Bohl, Vida Ahyong, Veasna Duong, Philippe Dussart, Jessica E Manning.                                                                                                                                                                                                                                                                                                                                              |
| 84 | EPI_ISL_411929 | hCoV-19/South Korea/SNU01/2020          | <i>Homo sapiens</i> | Asia / South Korea                            | 2020-01    | unknown                                                                                                           | Department of Clinical Diagnostics                                                                                                                                                                                                               | Park,W.B., Kwon,N.-J., Choi,S.-J., Kang,C.K., Choe,P.G., Kim,J.Y., Yun,J., Lee,G.-W., Seong,M.-W., Kim,N., Seo,J.-S. and Oh,M.-D.                                                                                                                                                                                                                                                                                                              |
| 85 | EPI_ISL_411950 | hCoV-19/Jiangsu/JS01/2020               | <i>Homo sapiens</i> | Asia / China / Jiangsu                        | 2020-01-23 | NHC Key laboratory of Enteric Pathogenic Microbiology, Institute of Pathogenic Microbiology                       | Jiangsu Provincial Center for Disease Control & Prevention                                                                                                                                                                                       | Lunbiao Cui,Kangchen Zhao,Xiaojuan Zhu,Yiyue Ge,Tao Wu,Bin Wu,Yin Chen,Fengcai Zhu,Baoli Zhu,Ming Wu                                                                                                                                                                                                                                                                                                                                           |

|    |                |                                     |                     |                                                     |            |                                                                                             |                                                                                                                         |                                                                                                                                                                                                                                                                                             |
|----|----------------|-------------------------------------|---------------------|-----------------------------------------------------|------------|---------------------------------------------------------------------------------------------|-------------------------------------------------------------------------------------------------------------------------|---------------------------------------------------------------------------------------------------------------------------------------------------------------------------------------------------------------------------------------------------------------------------------------------|
| 86 | EPI_ISL_411951 | hCoV-19/Sweden/01/2020              | <i>Homo sapiens</i> | Europe / Sweden                                     | 2020-02-07 | unknown                                                                                     | Unit for Laboratory Development and Technology Transfer, Public Health Agency of Sweden                                 | Bengner,M., Palmerus,M., Lindsjo,O., Lind Karlberg,M., Monteil,V., Appelberg,S., Brave,A., Muradrasoli,S. and Tegmark-Wisell,K.                                                                                                                                                             |
| 87 | EPI_ISL_411952 | hCoV-19/Jiangsu/JS02/2020           | <i>Homo sapiens</i> | Asia / China / Jiangsu                              | 2020-01-24 | NHC Key laboratory of Enteric Pathogenic Microbiology, Institute of Pathogenic Microbiology | Jiangsu Provincial Center for Disease Control & Prevention                                                              | Kangchen Zhao, Xiaojuan Zhu, Lunbiao Cui, Tao Wu, Yiyue Ge, Bin Wu, Yin Chen, Fengcai Zhu, Baoli Zhu, Ming Wu                                                                                                                                                                               |
| 88 | EPI_ISL_411955 | hCoV-19/USA/CA8/2020                | <i>Homo sapiens</i> | North America / USA / California                    | 2020-02-10 | California Department of Public Health                                                      | Pathogen Discovery, Respiratory Viruses Branch, Division of Viral Diseases, Centers for Diseases Control and Prevention | Krista Queen, Anna Uehara, Jing Zhang, Yan Li, Ying Tao, Clinton R. Paden, Haibin Wang, Shifaq Kamili, Xiaoyan Lu, Brian Lynch, Senthil Kumar K. Sakthivel, Brett L. Whitaker, Lijuan Wang, Janna' R. Murray, Susan I. Gerber, Stephen Lindstrom, Suxiang Tong                              |
| 89 | EPI_ISL_411956 | hCoV-19/USA/TX1/2020                | <i>Homo sapiens</i> | North America / USA / Texas                         | 2020-02-11 | Texas Department of State Health Services                                                   | Pathogen Discovery, Respiratory Viruses Branch, Division of Viral Diseases, Centers for Diseases Control and Prevention | Krista Queen, Anna Uehara, Jing Zhang, Yan Li, Ying Tao, Clinton R. Paden, Haibin Wang, Shifaq Kamili, Xiaoyan Lu, Brian Lynch, Senthil Kumar K. Sakthivel, Brett L. Whitaker, Lijuan Wang, Janna' R. Murray, Susan I. Gerber, Stephen Lindstrom, Suxiang Tong                              |
| 90 | EPI_ISL_411957 | hCoV-19/China/WH-09/2020            | <i>Homo sapiens</i> | Asia / China                                        | 2020-01-08 | unknown                                                                                     | Key Laboratory of Homo sapiens Diseases, Comparative Medicine, Institute of Laboratory Animal Science                   | Linlin,B., Lili,R., Shuran,G., Jiangning,L., Feifei,Q., Qi,L., Fengdi,L., Jing,X., Wei,D., Pin,Y., Yanfeng,X., Yajin,Q., Hong,G., Qiang,W., Mingya,L., Guanpeng,W., Shunyi,W., Zhiqi,S., Li,G., Lan,C., Conghui,W., Ying,W., Xinming,W., Yan,X., Qi,J. and Chuan,Q.                         |
| 91 | EPI_ISL_412029 | hCoV-19/Hong Kong/VB20024950/2020   | <i>Homo sapiens</i> | Asia / Hong Kong                                    | 2020-01-30 | Hong Kong Department of Health                                                              | The University of Hong Kong                                                                                             | Dominic N.C. Tsang, Daniel K.W. Chu, Leo L.M. Poon, Malik Peiris                                                                                                                                                                                                                            |
| 92 | EPI_ISL_412030 | hCoV-19/Hong Kong/VB20026565/2020   | <i>Homo sapiens</i> | Asia / Hong Kong                                    | 2020-02-01 | Hong Kong Department of Health                                                              | School of Public Health, The University of Hong Kong                                                                    | Dominic N.C. Tsang, Daniel K.W. Chu, Leo L.M. Poon, Malik Peiris                                                                                                                                                                                                                            |
| 93 | EPI_ISL_412459 | hCoV-19/Jingzhou/HBCDC-HB-01/2020   | <i>Homo sapiens</i> | Asia / China / Hubei / Jingzhou                     | 2020-01-08 | Jingzhou Center for Disease Control and Prevention                                          | Hubei Provincial Center for Disease Control and Prevention                                                              | Bin Fang, Xiang Li, Xiao Yu, Linlin Liu, Bo Yang, Faxian Zhan, Guojun Ye, Xixiang Huo, Junqiang Xu, Bo Yu, Kun Cai, Jing Li, Maoyi Chen, Jie Hu, Chunlin Mao, Yongzhong Jiang.                                                                                                              |
| 94 | EPI_ISL_412862 | hCoV-19/USA/CA9/2020                | <i>Homo sapiens</i> | North America / USA / California / Solano           | 2020-02-23 | California Department of Public Health                                                      | Pathogen Discovery, Respiratory Viruses Branch, Division of Viral Diseases, Centers for Disease Control and Prevention  | Krista Queen, Anna Uehara, Jing Zhang, Yan Li, Ying Tao, Clinton R. Paden, Haibin Wang, Shifaq Kamili, Xiaoyan Lu, Brian Lynch, Senthil Kumar K. Sakthivel, Brett L. Whitaker, Lijuan Wang, Janna' R. Murray, Jasmine Padilla, Justin Lee, Susan I. Gerber, Stephen Lindstrom, Suxiang Tong |
| 95 | EPI_ISL_412898 | hCoV-19/Wuhan/HBCDC-HB-02/2019      | <i>Homo sapiens</i> | Asia / China / Hubei / Wuhan                        | 2019-12-30 | Wuhan Jinyintan Hospital                                                                    | Hubei Provincial Center for Disease Control and Prevention                                                              | Bin Fang, Xiang Li, Xiao Yu, Linlin Liu, Bo Yang, Faxian Zhan, Guojun Ye, Xixiang Huo, Junqiang Xu, Bo Yu, Kun Cai, Jing Li, Yongzhong Jiang.                                                                                                                                               |
| 96 | EPI_ISL_412966 | hCoV-19/China/IQTC01/2020           | <i>Homo sapiens</i> | Asia / China / Guangdong / Guangzhou                | 2020-02-05 | unknown                                                                                     | Technology Centre, Guangzhou Customs                                                                                    | Shi, Y., Sun, J., Zheng, K., Huang, J. and Zhao, J.                                                                                                                                                                                                                                         |
| 97 | EPI_ISL_412967 | hCoV-19/China/IQTC02/2020           | <i>Homo sapiens</i> | Asia / China / Guangzhou                            | 2020-01-29 | unknown                                                                                     | Technology Centre, Guangzhou Customs                                                                                    | Shi, Y., Zheng, K., Sun, J., Huang, J., Zhu, A., Zhuang, Z., Dai, J., Chen, Z., Sun, F., Zhang, Z., Li, X. and Wang, Y.                                                                                                                                                                     |
| 98 | EPI_ISL_412969 | hCoV-19/Japan/Hu_DP_Kng_19-027/2020 | <i>Homo sapiens</i> | Asia / Japan                                        | 2020-02-10 | unknown                                                                                     | Takayuki Hishiki Kanagawa Prefectural Institute of Public Health, Department of Microbiology                            | Hishiki,T., Suzuki,R., Sakuragi,J., Usui,K., Tanaka,Y., Kawai,J., Kogo,Y., Matsuki,Y., An,T., Hayashizaki,Y. and Takasaki,T.                                                                                                                                                                |
| 99 | EPI_ISL_412970 | hCoV-19/USA/WA2/2020                | <i>Homo sapiens</i> | North America / USA / Washington / Snohomish County | 2020-02-24 | Washington State Department of Health                                                       | Seattle Flu Study                                                                                                       | Helen Chu, Michael Boeckh, Janet Englund, Michael Famulare, Barry Lutz, Deborah Nickerson, Mark Rieder, Lea Starita, Matthew Thompson, Jay Shendure, and Trevor Bedford                                                                                                                     |
| 99 | EPI_ISL_416462 | hCoV-19/USA/WA-S7/2020              | <i>Homo sapiens</i> | North America / USA / Washington                    | 2020-02-24 | Seattle Flu Study                                                                           | Seattle Flu Study                                                                                                       | Chu et al                                                                                                                                                                                                                                                                                   |

|     |                |                                   |                     |                                                     |            |                                                                                         |                                                                                                                      |                                                                                                                                                                                                                                                                                                                                                                            |
|-----|----------------|-----------------------------------|---------------------|-----------------------------------------------------|------------|-----------------------------------------------------------------------------------------|----------------------------------------------------------------------------------------------------------------------|----------------------------------------------------------------------------------------------------------------------------------------------------------------------------------------------------------------------------------------------------------------------------------------------------------------------------------------------------------------------------|
| 99  | EPI_ISL_417095 | hCoV-19/USA/WA-S42/2020           | <i>Homo sapiens</i> | North America / USA / Washington / King County      | 2020-02-28 | Washington State Department of Health                                                   | Seattle Flu Study                                                                                                    | Chu et al                                                                                                                                                                                                                                                                                                                                                                  |
| 99  | EPI_ISL_417100 | hCoV-19/USA/WA-S47/2020           | <i>Homo sapiens</i> | North America / USA / Washington / Snohomish County | 2020-02-29 | Washington State Department of Health                                                   | Seattle Flu Study                                                                                                    | Chu et al                                                                                                                                                                                                                                                                                                                                                                  |
| 100 | EPI_ISL_412972 | hCoV-19/Mexico/CDMX-InDRE_01/2020 | <i>Homo sapiens</i> | North America / Mexico / Mexico City                | 2020-02-27 | Instituto Nacional de Enfermedades Respiratorias                                        | Instituto de Diagnostico y Referencia Epidemiologicos (INDRE)                                                        | Ramirez-Gonzalez Ernesto, Garces-Ayala Fabiola, Araiza-Rodriguez Adnan, Mendieta-Condado Edgar, Rodriguez-Maldonado Abril, Wong-Arambula Claudia, Vazquez-Perez Joel, Martinez Arturo, Boukadida Celia, Munoz-Medina Esteban, Sanchez Alejandro, Isa Pavel, Taboada Blanca, Lopez Susana, Arias Carlos, Barrera-Badillo Gisela, Hernandez-Rivas Lucia, Lopez-Martinez Irma |
| 100 | EPI_ISL_416428 | hCoV-19/Vietnam/39607/2020        | <i>Homo sapiens</i> | Asia / Vietnam / Quangning                          | 2020-03-07 | National Influenza Center, National Institute of Hygiene and Epidemiology (NIHE)        | National Influenza Center, National Institute of Hygiene and Epidemiology (NIHE)                                     | Le Quynh Mai, Taichiro Takemura, Meng Ling Moi, Takeshi Nabeshima, Nguyen Le Khanh Hang, Hoang Vu Mai Phuong, Ung Thi Hong Trang, Le Thi Thanh, Nguyen Vu Son, Vuong Duc Cuong, Pham Thi Hien, Tran Thu Huong, Nguyen Phuong Anh, Pham Hong Quynh Anh, Kouichi Morita, Futoshi Hasebe, Dang Duc Anh                                                                        |
| 100 | EPI_ISL_416430 | hCoV-19/Vietnam/CM295/2020        | <i>Homo sapiens</i> | Asia / Vietnam / Hanoi                              | 2020-03-06 | National Influenza Center, National Institute of Hygiene and Epidemiology (NIHE)        | National Influenza Center, National Institute of Hygiene and Epidemiology (NIHE)                                     | Le Quynh Mai, Taichiro Takemura, Meng Ling Moi, Takeshi Nabeshima, Nguyen Le Khanh Hang, Hoang Vu Mai Phuong, Ung Thi Hong Trang, Le Thi Thanh, Nguyen Vu Son, Vuong Duc Cuong, Pham Thi Hien, Tran Thu Huong, Nguyen Phuong Anh, Pham Hong Quynh Anh, Kouichi Morita, Futoshi Hasebe, Dang Duc Anh                                                                        |
| 100 | EPI_ISL_416431 | hCoV-19/Vietnam/CM296/2020        | <i>Homo sapiens</i> | Asia / Vietnam / Hanoi                              | 2020-03-06 | National Influenza Center, National Institute of Hygiene and Epidemiology (NIHE)        | National Influenza Center, National Institute of Hygiene and Epidemiology (NIHE)                                     | Le Quynh Mai, Taichiro Takemura, Meng Ling Moi, Takeshi Nabeshima, Nguyen Le Khanh Hang, Hoang Vu Mai Phuong, Ung Thi Hong Trang, Le Thi Thanh, Nguyen Vu Son, Vuong Duc Cuong, Pham Thi Hien, Tran Thu Huong, Nguyen Phuong Anh, Pham Hong Quynh Anh, Kouichi Morita, Futoshi Hasebe, Dang Duc Anh                                                                        |
| 101 | EPI_ISL_412973 | hCoV-19/Italy/CDG1/2020           | <i>Homo sapiens</i> | Europe / Italy / Lombardy                           | 2020-02-20 | Department of Infectious Diseases, Istituto Superiore di Sanità, Roma, Italy            | Virology Laboratory, Scientific Department, Army Medical Center                                                      | Paola Stefanelli, Stefano Fiore, Antonella Marchi, Eleonora Benedetti, Concetta Fabiani, Giovanni Faggioni, Antonella Fortunato, Riccardo De Santis, Silvia Fillo, Anna Anselmo, Andrea Ciannaruconi, Stefano Palomba, Florigio Lista                                                                                                                                      |
| 102 | EPI_ISL_412974 | hCoV-19/Italy/SPL1/2020           | <i>Homo sapiens</i> | Europe / Italy / Rome                               | 2020-01-29 | Department of Infectious Diseases, Istituto Superiore di Sanità, Rome, Italy            | Virology Laboratory, Scientific Department, Army Medical Center                                                      | Paola Stefanelli, Stefano Fiore, Antonella Marchi, Eleonora Benedetti, Concetta Fabiani, Giovanni Faggioni, Antonella Fortunato, Silvia Fillo, Riccardo De Santis, Andrea Ciannaruconi, Giancarlo Petralito, Filippo Molinari, Florigio Lista                                                                                                                              |
| 103 | EPI_ISL_412975 | hCoV-19/Australia/NSW05/2020      | <i>Homo sapiens</i> | Oceania / Australia / New South Wales / Sydney      | 2020-02-28 | Centre for Infectious Diseases and Microbiology Laboratory Services                     | NSW Health Pathology - Institute of Clinical Pathology and Medical Research; Westmead Hospital; University of Sydney | Eden J-S, Carter I, Rahman H, Holmes EC, Rockett R, O'Sullivan MV, Sintchenko V, Chen SC, Maddocks S, Kok J and Dwyer DE for the 2019-nCoV Study Group                                                                                                                                                                                                                     |
| 104 | EPI_ISL_412978 | hCoV-19/Wuhan/HBCDC-HB-02/2020    | <i>Homo sapiens</i> | Asia / China / Hubei / Wuhan                        | 2020-01-17 | The Central Hospital Of Wuhan                                                           | Hubei Provincial Center for Disease Control and Prevention                                                           | Bin Fang, Xiang Li, Xiao Yu, Linlin Liu, Bo Yang, Faxian Zhan, Guojun Ye, Xixiang Huo, Junqiang Xu, Bo Yu, Kun Cai, Jing Li, Yongzhong Jiang.                                                                                                                                                                                                                              |
| 105 | EPI_ISL_412979 | hCoV-19/Wuhan/HBCDC-HB-03/2020    | <i>Homo sapiens</i> | Asia / China / Hubei / Wuhan                        | 2020-01-18 | Union Hospital of Tongji Medical College, Huazhong University of Science and Technology | Hubei Provincial Center for Disease Control and Prevention                                                           | Bin Fang, Xiang Li, Xiao Yu, Linlin Liu, Bo Yang, Faxian Zhan, Guojun Ye, Xixiang Huo, Junqiang Xu, Bo Yu, Kun Cai, Jing Li, Yongzhong Jiang.                                                                                                                                                                                                                              |

|     |                |                                     |                     |                                                |            |                                                                                                 |                                                                                                                      |                                                                                                                                                                                                                                                                                                                 |
|-----|----------------|-------------------------------------|---------------------|------------------------------------------------|------------|-------------------------------------------------------------------------------------------------|----------------------------------------------------------------------------------------------------------------------|-----------------------------------------------------------------------------------------------------------------------------------------------------------------------------------------------------------------------------------------------------------------------------------------------------------------|
| 106 | EPI_ISL_412980 | hCoV-19/Wuhan/HBCDC-HB-04/2020      | <i>Homo sapiens</i> | Asia / China / Hubei / Wuhan                   | 2020-01-18 | Union Hospital of Tongji Medical College, Huazhong University of Science and Technology         | Hubei Provincial Center for Disease Control and Prevention                                                           | Bin Fang, Xiang Li, Xiao Yu, Linlin Liu, Bo Yang, Faxian Zhan, Guojun Ye, Xixiang Huo, Junqiang Xu, Bo Yu, Kun Cai, Jing Li, Yongzhong Jiang.                                                                                                                                                                   |
| 107 | EPI_ISL_412982 | hCoV-19/Wuhan/HBCDC-HB-06/2020      | <i>Homo sapiens</i> | Asia / China / Hubei / Wuhan                   | 2020-02-07 | Wuhan Lung Hospital                                                                             | Hubei Provincial Center for Disease Control and Prevention                                                           | Bin Fang, Xiang Li, Xiao Yu, Linlin Liu, Bo Yang, Faxian Zhan, Guojun Ye, Xixiang Huo, Junqiang Xu, Bo Yu, Kun Cai, Jing Li, Yongzhong Jiang.                                                                                                                                                                   |
| 108 | EPI_ISL_413016 | hCoV-19/Brazil/SPBR-02/2020         | <i>Homo sapiens</i> | South America / Brazil / Sao Paulo / Sao Paulo | 2020-02-28 | Hospital Israelita Albert Einstein                                                              | Instituto Adolfo Lutz, Interdisciplinary Procedures Center, Strategic Laboratory                                     | Jaqueline Goes de Jesus, Claudio Tavares Sacchi, Fabiana Cristina Pereira dos Santos, Ingra Morales Claro, Flávia Cristina da Silva Sales, Claudia Regina Gonçalves, Joshua Quick, Maria do Carmo Sampaio Tavares Timenetsky, Nicholas James Loman, Andrew Rambaut, Ester Cerdeira Sabino, Nuno Rodrigues Faria |
| 109 | EPI_ISL_413017 | hCoV-19/South Korea/KUMC01/2020     | <i>Homo sapiens</i> | Asia / South Korea                             | 2020-02-06 | Department of Microbiology, Institute for Viral Diseases, College of Medicine, Korea University | Department of Microbiology, Institute for Viral Diseases, College of Medicine, Korea University                      | Changmin Kang, Joon-Yong Bae, Jungmin Lee, Heedo Park, Juyoung Cho, Jeonghun Kim, Gee eun Lee, Cui Chunguang, Kyeong-ryeol Shin, Dong Min Kim, Jin Il Kim, Man-Seong Park                                                                                                                                       |
| 110 | EPI_ISL_413018 | hCoV-19/South Korea/KUMC02/2020     | <i>Homo sapiens</i> | Asia / South Korea                             | 2020-02-06 | Department of Microbiology, Institute for Viral Diseases, College of Medicine, Korea University | Department of Microbiology, Institute for Viral Diseases, College of Medicine, Korea University                      | Changmin Kang, Joon-Yong Bae, Jungmin Lee, Heedo Park, Juyoung Cho, Jeonghun Kim, Gee eun Lee, Cui Chunguang, Kyeong-ryeol Shin, Dong Min Kim, Jin Il Kim, Man-Seong Park                                                                                                                                       |
| 111 | EPI_ISL_413023 | hCoV-19/Switzerland/1000477797/2020 | <i>Homo sapiens</i> | Europe / Switzerland / Zurich                  | 2020-02-29 | Division of Infectious Diseases, University Hospital Zurich                                     | Institute of Medical Virology, University of Zurich                                                                  | Stefan Schmutz, Maryam Zaheri, Verena Kufner, Gabriela Ziltener, Patrick Redli, Fiona Steiner, Jon Huder, Riccarda Capaul, Andrea Zbinden, Jürg Böni, Michael Huber, Roberto Speck, Alexandra Trkola                                                                                                            |
| 112 | EPI_ISL_413025 | hCoV-19/USA/WA3-UW1/2020            | <i>Homo sapiens</i> | North America / USA / Washington               | 2020-02-27 | Harborview Medical Center                                                                       | UW Virology Lab                                                                                                      | Pavitra Roychoudhury, Arun Nalla, Hong Xie, Keith Jerome, Alexander Greninger                                                                                                                                                                                                                                   |
| 113 | EPI_ISL_413213 | hCoV-19/Australia/NSW06/2020        | <i>Homo sapiens</i> | Oceania / Australia / New South Wales / Sydney | 2020-02-29 | Centre for Infectious Diseases and Microbiology Laboratory Services                             | NSW Health Pathology - Institute of Clinical Pathology and Medical Research; Westmead Hospital; University of Sydney | Eden J-S, Carter I, Rahman H, Holmes EC, Rockett R, O'Sullivan MV, Sintchenko V, Chen SC, Maddocks S, Kok J and Dwyer DE for the 2019-nCoV Study Group*                                                                                                                                                         |
| 114 | EPI_ISL_413214 | hCoV-19/Australia/NSW07/2020        | <i>Homo sapiens</i> | Oceania / Australia / New South Wales / Sydney | 2020-02-29 | Centre for Infectious Diseases and Microbiology Laboratory Services                             | NSW Health Pathology - Institute of Clinical Pathology and Medical Research; Westmead Hospital; University of Sydney | Eden J-S, Carter I, Rahman H, Holmes EC, Rockett R, O'Sullivan MV, Sintchenko V, Chen SC, Maddocks S, Kok J and Dwyer DE for the 2019-nCoV Study Group*                                                                                                                                                         |
| 115 | EPI_ISL_413455 | hCoV-19/USA/WA4-UW2/2020            | <i>Homo sapiens</i> | North America / USA / Washington               | 2020-02-28 | Washington State Public Health Lab                                                              | University of Washington Virology Lab                                                                                | Pavitra Roychoudhury, Arun Nalla, Hong Xie, Keith Jerome, Alexander Greninger                                                                                                                                                                                                                                   |
| 116 | EPI_ISL_413456 | hCoV-19/USA/WA-S2/2020              | <i>Homo sapiens</i> | North America / USA / Washington / King County | 2020-02-20 | Seattle Flu Study                                                                               | Seattle Flu Study                                                                                                    | Chu et al                                                                                                                                                                                                                                                                                                       |
| 116 | EPI_ISL_413457 | hCoV-19/USA/WA6-UW3/2020            | <i>Homo sapiens</i> | North America / USA / Washington               | 2020-02-29 | Washington State Public Health Lab                                                              | UW Virology Lab                                                                                                      | Pavitra Roychoudhury, Arun Nalla, Hong Xie, Keith Jerome, Alexander Greninger                                                                                                                                                                                                                                   |
| 116 | EPI_ISL_413560 | hCoV-19/USA/WA-S3/2020              | <i>Homo sapiens</i> | North America / USA / Washington               | 2020-02-28 | Seattle Flu Study                                                                               | Seattle Flu Study                                                                                                    | Chu et al                                                                                                                                                                                                                                                                                                       |
| 116 | EPI_ISL_414366 | hCoV-19/USA/WA-UW18/2020            | <i>Homo sapiens</i> | North America / USA / Washington               | 2020-03-05 | UW Virology Lab                                                                                 | UW Virology Lab                                                                                                      | Pavitra Roychoudhury, Hong Xie, Keith Jerome, Alexander Greninger                                                                                                                                                                                                                                               |
| 116 | EPI_ISL_415541 | hCoV-19/USA/UPHL-03/2020            | <i>Homo sapiens</i> | North America / USA / Utah                     | 2020-03-13 | Utah Public Health Laboratory                                                                   | Utah Public Health Laboratory                                                                                        | Erin Young, Kelly Oakeson                                                                                                                                                                                                                                                                                       |
| 116 | EPI_ISL_415542 | hCoV-19/USA/UPHL-04/2020            | <i>Homo sapiens</i> | North America / USA / Utah                     | 2020-03-13 | Utah Public Health Laboratory                                                                   | Utah Public Health Laboratory                                                                                        | Erin Young, Kelly Oakeson                                                                                                                                                                                                                                                                                       |

|     |                |                               |                     |                                                              |            |                                          |                   |                                                                   |
|-----|----------------|-------------------------------|---------------------|--------------------------------------------------------------|------------|------------------------------------------|-------------------|-------------------------------------------------------------------|
| 116 | EPI_ISL_416460 | hCoV-19/USA/WA-S5/2020        | <i>Homo sapiens</i> | North America /<br>USA / Washington<br>/ King County         | 2020-02-29 | Seattle Flu Study                        | Seattle Flu Study | Chu et al                                                         |
| 116 | EPI_ISL_416461 | hCoV-19/USA/WA-S6/2020        | <i>Homo sapiens</i> | North America /<br>USA / Washington<br>/ King County         | 2020-02-29 | Seattle Flu Study                        | Seattle Flu Study | Chu et al                                                         |
| 116 | EPI_ISL_416465 | hCoV-19/USA/WA-S10/2020       | <i>Homo sapiens</i> | North America /<br>USA / Washington<br>/ King County         | 2020-02-29 | Seattle Flu Study                        | Seattle Flu Study | Chu et al                                                         |
| 116 | EPI_ISL_416643 | hCoV-19/USA/WA-<br>UW105/2020 | <i>Homo sapiens</i> | North America /<br>USA / Washington                          | 2020-03-11 | UW Virology Lab                          | UW Virology Lab   | Pavitra Roychoudhury, Hong Xie, Keith Jerome, Alexander Greninger |
| 116 | EPI_ISL_417077 | hCoV-19/USA/WA-S24/2020       | <i>Homo sapiens</i> | North America /<br>USA / Washington<br>/ Snohomish<br>County | 2020-03-02 | Washington State Department<br>of Health | Seattle Flu Study | Chu et al                                                         |
| 116 | EPI_ISL_417091 | hCoV-19/USA/WA-S38/2020       | <i>Homo sapiens</i> | North America /<br>USA / Washington<br>/ Snohomish<br>County | 2020-03-04 | Washington State Department<br>of Health | Seattle Flu Study | Chu et al                                                         |
| 116 | EPI_ISL_417105 | hCoV-19/USA/WA-S52/2020       | <i>Homo sapiens</i> | North America /<br>USA / Washington<br>/ Snohomish<br>County | 2020-03-03 | Washington State Department<br>of Health | Seattle Flu Study | Chu et al                                                         |
| 116 | EPI_ISL_417108 | hCoV-19/USA/WA-S55/2020       | <i>Homo sapiens</i> | North America /<br>USA / Washington<br>/ King County         | 2020-02-29 | Washington State Department<br>of Health | Seattle Flu Study | Chu et al                                                         |
| 116 | EPI_ISL_417124 | hCoV-19/USA/WA-S71/2020       | <i>Homo sapiens</i> | North America /<br>USA / Washington<br>/ King County         | 2020-03-05 | Washington State Department<br>of Health | Seattle Flu Study | Chu et al                                                         |
| 116 | EPI_ISL_417128 | hCoV-19/USA/WA-S75/2020       | <i>Homo sapiens</i> | North America /<br>USA / Washington<br>/ King County         | 2020-03-05 | Washington State Department<br>of Health | Seattle Flu Study | Chu et al                                                         |
| 116 | EPI_ISL_417135 | hCoV-19/USA/WA-S82/2020       | <i>Homo sapiens</i> | North America /<br>USA / Washington<br>/ King County         | 2020-02-22 | Washington State Department<br>of Health | Seattle Flu Study | Chu et al                                                         |
| 116 | EPI_ISL_417141 | hCoV-19/USA/WA-S88/2020       | <i>Homo sapiens</i> | North America /<br>USA / Washington<br>/ King County         | 2020-03-01 | Washington State Department<br>of Health | Seattle Flu Study | Chu et al                                                         |
| 116 | EPI_ISL_417144 | hCoV-19/USA/WA-S91/2020       | <i>Homo sapiens</i> | North America /<br>USA / Washington<br>/ Snohomish<br>County | 2020-03-02 | Washington State Department<br>of Health | Seattle Flu Study | Chu et al                                                         |



|     |                |                                     |                     |                                                  |            |                                                                                                        |                                                                                                              |                                                                                                                                                                                                                                    |
|-----|----------------|-------------------------------------|---------------------|--------------------------------------------------|------------|--------------------------------------------------------------------------------------------------------|--------------------------------------------------------------------------------------------------------------|------------------------------------------------------------------------------------------------------------------------------------------------------------------------------------------------------------------------------------|
| 116 | EPI_ISL_417154 | hCoV-19/USA/WA-S101/2020            | <i>Homo sapiens</i> | North America / USA / Washington / King County   | 2020-02-28 | Washington State Department of Health                                                                  | Seattle Flu Study                                                                                            | Chu et al                                                                                                                                                                                                                          |
| 116 | EPI_ISL_417156 | hCoV-19/USA/WA-S103/2020            | <i>Homo sapiens</i> | North America / USA / Washington / King County   | 2020-02-28 | Washington State Department of Health                                                                  | Seattle Flu Study                                                                                            | Chu et al                                                                                                                                                                                                                          |
| 116 | EPI_ISL_417169 | hCoV-19/USA/WA-S116/2020            | <i>Homo sapiens</i> | North America / USA / Washington                 | 2020-03-02 | Washington State Department of Health                                                                  | Seattle Flu Study                                                                                            | Chu et al                                                                                                                                                                                                                          |
| 117 | EPI_ISL_413458 | hCoV-19/USA/WA7-UW4/2020            | <i>Homo sapiens</i> | North America / USA / Washington                 | 2020-03-01 | Washington State Public Health Lab                                                                     | UW Virology Lab                                                                                              | Pavitra Roychoudhury, Arun Nalla, Hong Xie, Keith Jerome, Alexander Greninger                                                                                                                                                      |
| 118 | EPI_ISL_413489 | hCoV-19/Italy/UniSR1/2020           | <i>Homo sapiens</i> | Europe / Italy / Lombardy / Milan                | 2020-03-03 | Laboratorio di Microbiologia e Virologia, Università Vita-Salute San Raffaele, Milano                  | Laboratorio di Microbiologia e Virologia, Università Vita-Salute San Raffaele, Milano                        | R.A Diotti, E. Criscuolo, M. Castelli, V. Caputo, R. Ferrarese, M. Sampaolo, E. Boeri, I. Negri, V. Amato, G. Lo Raso, C. Di Resta, R. Burioni, M. Clementi, N. Mancini & N. Clementi                                              |
| 119 | EPI_ISL_413513 | hCoV-19/South Korea/KUMC03/2020     | <i>Homo sapiens</i> | Asia / South Korea                               | 2020-02-27 | Division of Infectious Diseases, Department of Internal Medicine, Korea University College of Medicine | Department of Microbiology, Institute for Viral Diseases, College of Medicine, Korea University              | Changmin Kang, Joon-Yong Bae, Jungmin Lee, Jin Gu Yoon, Heedo Park, Juyoung Cho, Jeonghun Kim, Gee Eun Lee, Cui Chunguang, Kyeong-ryeol Shin, Ji Yun Noh, Joon Young Song, Hee Jin Cheong, Woo Joo Kim, Jin Il Kim, Man-Seong Park |
| 119 | EPI_ISL_413514 | hCoV-19/South Korea/KUMC04/2020     | <i>Homo sapiens</i> | Asia / South Korea                               | 2020-02-27 | Department of Microbiology, Institute for Viral Diseases, College of Medicine, Korea University        | Department of Microbiology, Institute for Viral Diseases, College of Medicine, Korea University              | Changmin Kang, Joon-Yong Bae, Jungmin Lee, Jin Gu Yoon, Heedo Park, Juyoung Cho, Jeonghun Kim, Gee Eun Lee, Cui Chunguang, Kyeong-ryeol Shin, Ji Yun Noh, Joon Young Song, Hee Jin Cheong, Woo Joo Kim, Jin Il Kim, Man-Seong Park |
| 119 | EPI_ISL_413515 | hCoV-19/South Korea/KUMC05/2020     | <i>Homo sapiens</i> | Asia / South Korea                               | 2020-02-27 | Division of Infectious Diseases, Department of Internal Medicine, Korea University College of Medicine | Department of Microbiology, Institute for Viral Diseases, College of Medicine, Korea University              | Changmin Kang, Joon-Yong Bae, Jungmin Lee, Jin Gu Yoon, Heedo Park, Juyoung Cho, Jeonghun Kim, Gee Eun Lee, Cui Chunguang, Kyeong-ryeol Shin, Ji Yun Noh, Joon Young Song, Hee Jin Cheong, Woo Joo Kim, Jin Il Kim, Man-Seong Park |
| 119 | EPI_ISL_413516 | hCoV-19/South Korea/KUMC06/2020     | <i>Homo sapiens</i> | Asia / South Korea                               | 2020-02-27 | Department of Microbiology, Institute for Viral Diseases, College of Medicine, Korea University        | Department of Microbiology, Institute for Viral Diseases, College of Medicine, Korea University              | Changmin Kang, Joon-Yong Bae, Jungmin Lee, Jin Gu Yoon, Heedo Park, Juyoung Cho, Jeonghun Kim, Gee Eun Lee, Cui Chunguang, Kyeong-ryeol Shin, Ji Yun Noh, Joon Young Song, Hee Jin Cheong, Woo Joo Kim, Jin Il Kim, Man-Seong Park |
| 119 | EPI_ISL_413518 | hCoV-19/Beijing/105/2020            | <i>Homo sapiens</i> | Asia / China / Beijing                           | 2020-01-26 | unknown                                                                                                | Infectious Disease Control Center                                                                            | Li,J., Li,L., Li,Z., Qiu,S., Song,H., Li,P. and Li,P.                                                                                                                                                                              |
| 119 | EPI_ISL_413519 | hCoV-19/Beijing/231/2020            | <i>Homo sapiens</i> | Asia / China / Beijing                           | 2020-01-28 | unknown                                                                                                | Infectious Disease Control Center                                                                            | Li,J., Li,L., Li,Z., Qiu,S., Song,H., Li,P. and Li,P.                                                                                                                                                                              |
| 119 | EPI_ISL_413521 | hCoV-19/Beijing/235/2020            | <i>Homo sapiens</i> | Asia / China / Beijing                           | 2020-01-28 | unknown                                                                                                | Infectious Disease Control Center                                                                            | Li,J., Li,L., Li,Z., Qiu,S., Song,H., Li,P. and Li,P.                                                                                                                                                                              |
| 120 | EPI_ISL_413520 | hCoV-19/Beijing/233/2020            | <i>Homo sapiens</i> | Asia / China / Beijing                           | 2020-01-28 | unknown                                                                                                | Infectious Disease Control Center                                                                            | Li,J., Li,L., Li,Z., Qiu,S., Song,H., Li,P. and Li,P.                                                                                                                                                                              |
| 121 | EPI_ISL_413523 | hCoV-19/India/1-31/2020             | <i>Homo sapiens</i> | Asia / India / Kerala                            | 2020-01-31 | Indian Council of Medical Research-National Institute of Virology                                      | National Influenza Center, Indian Council of Medical Research-National Institute of Virology                 | Potdar V, Yadav PD, Choudhary ML, Shete-Aich A                                                                                                                                                                                     |
| 122 | EPI_ISL_413555 | hCoV-19/Wales/PHW1/2020             | <i>Homo sapiens</i> | Europe / United Kingdom / Wales                  | 2020-02-27 | Wales Specialist Virology Centre                                                                       | Public Health Wales Microbiology Cardiff                                                                     | Catherine Moore, Cen Sabu, Joanne Watkins, Sally Corden, Tom Connor                                                                                                                                                                |
| 122 | EPI_ISL_414587 | hCoV-19/Ireland/Limerick-19935/2020 | <i>Homo sapiens</i> | Europe / Ireland / Limerick                      | 2020-03-03 | UCD National Virus Reference Laboratory                                                                | UCD National Virus Reference Laboratory                                                                      | Michael Carr, Gabriel Gonzalez, Jonathan Dean, Suzie Coughlan, Alison Murphy, Kevin Byrne, Ken Wolfe, Jeff Connell, Brendan Loftus, Cillian F De Gascun                                                                            |
| 123 | EPI_ISL_413558 | hCoV-19/USA/CA-CDPH-UC2/2020        | <i>Homo sapiens</i> | North America / USA / California / Solano County | 2020-02-27 | California Department of Public Health                                                                 | Chiu Laboratory, UCSF-Abbott Viral Diagnostics and Discovery Center, University of California, San Francisco | Xianding Deng, Scot Federman, Guixia Yu, Chao-Yang Pan, Hugo Guevara, Alicia Sotomayor-Gonzalez, Allan Gopez, Wei Gu, Steve Miller, Debra A. Wadford, and Charles Y. Chiu                                                          |

|     |                |                                           |                     |                                                  |            |                                            |                                                                                                              |                                                                                                                                                                                                                                                                                                                                                                                                                                   |
|-----|----------------|-------------------------------------------|---------------------|--------------------------------------------------|------------|--------------------------------------------|--------------------------------------------------------------------------------------------------------------|-----------------------------------------------------------------------------------------------------------------------------------------------------------------------------------------------------------------------------------------------------------------------------------------------------------------------------------------------------------------------------------------------------------------------------------|
| 124 | EPI_ISL_413559 | hCoV-19/USA/CA-CDPH-UC3/2020              | <i>Homo sapiens</i> | North America / USA / California / Solano County | 2020-02-27 | California Department of Public Health     | Chiu Laboratory, UCSF-Abbott Viral Diagnostics and Discovery Center, University of California, San Francisco | Xianding Deng, Scot Federman, Guixia Yu, Chao-Yang Pan, Hugo Guevara, Alicia Sotomayor-Gonzalez, Allan Gopez, Wei Gu, Steve Miller, Debra A. Wadford, and Charles Y. Chiu                                                                                                                                                                                                                                                         |
| 125 | EPI_ISL_413563 | hCoV-19/USA/WA12-UW8/2020                 | <i>Homo sapiens</i> | North America / USA / Washington                 | 2020-03-03 | UW Virology Lab                            | UW Virology Lab                                                                                              | Pavitra Roychoudhury, Hong Xie, Keith Jerome, Alexander Greninger                                                                                                                                                                                                                                                                                                                                                                 |
| 126 | EPI_ISL_413566 | hCoV-19/Netherlands/Blaricum_1364780/2020 | <i>Homo sapiens</i> | Europe / Netherlands / Blaricum                  | 2020-03-02 | MHC Gooi & Vechtstreek                     | Erasmus Medical Center                                                                                       | David Nieuwenhuijse, Bas Oude Munnink, Reina Sikkema, Claudia Schapendonk, Irina Chestakova, Anne van der Linden, Mark Pronk, Pascal Lexmond, Corien Swaan, Manon Haverkate, Madelief Mollers, Mart Stein, Sandra Kengne Kanga Mobou, Jeroen van Kampen, Jolanda Voermans, Aura Timen, Corine GeurtsvanKessel, Annemiek van der Eijk, Richard Molenkamp, Marion Koopmans, on behalf of the Dutch national COVID-19 response team. |
| 126 | EPI_ISL_413591 | hCoV-19/Netherlands/Zeewolde_1365080/2020 | <i>Homo sapiens</i> | Europe / Netherlands / Zeewolde                  | 2020-03-02 | MHC Flevoland                              | Erasmus Medical Center                                                                                       | David Nieuwenhuijse, Bas Oude Munnink, Reina Sikkema, Claudia Schapendonk, Irina Chestakova, Anne van der Linden, Mark Pronk, Pascal Lexmond, Corien Swaan, Manon Haverkate, Madelief Mollers, Mart Stein, Sandra Kengne Kanga Mobou, Jeroen van Kampen, Jolanda Voermans, Aura Timen, Corine GeurtsvanKessel, Annemiek van der Eijk, Richard Molenkamp, Marion Koopmans, on behalf of the Dutch national COVID-19 response team. |
| 126 | EPI_ISL_414443 | hCoV-19/Netherlands/Utrecht_11/2020       | <i>Homo sapiens</i> | Europe / Netherlands / Utrecht                   | 2020-03-03 | Dutch COVID-19 response team               | Erasmus Medical Center                                                                                       | David Nieuwenhuijse, Bas Oude Munnink, Reina Sikkema, Claudia Schapendonk, Irina Chestakova, Anne van der Linden, Mark Pronk, Pascal Lexmond, Corien Swaan, Manon Haverkate, Madelief Mollers, Mart Stein, Sandra Kengne Kanga Mobou, Jeroen van Kampen, Jolanda Voermans, Aura Timen, Corine GeurtsvanKessel, Annemiek van der Eijk, Richard Molenkamp, Marion Koopmans, on behalf of the Dutch national COVID-19 response team. |
| 127 | EPI_ISL_413572 | hCoV-19/Netherlands/Haarlem_1363688/2020  | <i>Homo sapiens</i> | Europe / Netherlands / Haarlem                   | 2020-03-01 | MHC Kennemerland                           | Erasmus Medical Center                                                                                       | David Nieuwenhuijse, Bas Oude Munnink, Reina Sikkema, Claudia Schapendonk, Irina Chestakova, Anne van der Linden, Mark Pronk, Pascal Lexmond, Corien Swaan, Manon Haverkate, Madelief Mollers, Mart Stein, Sandra Kengne Kanga Mobou, Jeroen van Kampen, Jolanda Voermans, Aura Timen, Corine GeurtsvanKessel, Annemiek van der Eijk, Richard Molenkamp, Marion Koopmans, on behalf of the Dutch national COVID-19 response team. |
| 128 | EPI_ISL_413579 | hCoV-19/Netherlands/Nootdorp_1364222/2020 | <i>Homo sapiens</i> | Europe / Netherlands / Nootdorp                  | 2020-03-03 | MHC Haaglanden                             | Erasmus Medical Center                                                                                       | David Nieuwenhuijse, Bas Oude Munnink, Reina Sikkema, Claudia Schapendonk, Irina Chestakova, Anne van der Linden, Mark Pronk, Pascal Lexmond, Corien Swaan, Manon Haverkate, Madelief Mollers, Mart Stein, Sandra Kengne Kanga Mobou, Jeroen van Kampen, Jolanda Voermans, Aura Timen, Corine GeurtsvanKessel, Annemiek van der Eijk, Richard Molenkamp, Marion Koopmans, on behalf of the Dutch national COVID-19 response team. |
| 128 | EPI_ISL_413587 | hCoV-19/Netherlands/Tilburg_1364286/2020  | <i>Homo sapiens</i> | Europe / Netherlands / Tilburg                   | 2020-03-03 | Foundation Elisabeth-Tweesteden Ziekenhuis | Erasmus Medical Center                                                                                       | David Nieuwenhuijse, Bas Oude Munnink, Reina Sikkema, Claudia Schapendonk, Irina Chestakova, Anne van der Linden, Mark Pronk, Pascal Lexmond, Corien Swaan, Manon Haverkate, Madelief Mollers, Mart Stein, Sandra Kengne Kanga Mobou, Jeroen van Kampen, Jolanda Voermans, Aura Timen, Corine GeurtsvanKessel, Annemiek van der Eijk, Richard Molenkamp, Marion Koopmans, on behalf of the Dutch national COVID-19 response team. |

|     |                |                                            |                     |                                      |            |                              |                        |                                                                                                                                                                                                                                                                                                                                                                                                                                   |
|-----|----------------|--------------------------------------------|---------------------|--------------------------------------|------------|------------------------------|------------------------|-----------------------------------------------------------------------------------------------------------------------------------------------------------------------------------------------------------------------------------------------------------------------------------------------------------------------------------------------------------------------------------------------------------------------------------|
| 129 | EPI_ISL_413584 | hCoV-19/Netherlands/Rotterdam_1364740/2020 | <i>Homo sapiens</i> | Europe / Netherlands / Rotterdam     | 2020-03-03 | unknown                      | Erasmus Medical Center | David Nieuwenhuijse, Bas Oude Munnink, Reina Sikkema, Claudia Schapendonk, Irina Chestakova, Anne van der Linden, Mark Pronk, Pascal Lexmond, Corien Swaan, Manon Haverkate, Madelief Mollers, Mart Stein, Sandra Kengne Kanga Mobou, Jeroen van Kampen, Jolanda Voermans, Aura Timen, Corine GeurtsvanKessel, Annemiek van der Eijk, Richard Molenkamp, Marion Koopmans, on behalf of the Dutch national COVID-19 response team. |
| 129 | EPI_ISL_414423 | hCoV-19/Netherlands/Gelderland_1/2020      | <i>Homo sapiens</i> | Europe / Netherlands / Gelderland    | 2020-03-02 | Dutch COVID-19 response team | Erasmus Medical Center | David Nieuwenhuijse, Bas Oude Munnink, Reina Sikkema, Claudia Schapendonk, Irina Chestakova, Anne van der Linden, Mark Pronk, Pascal Lexmond, Corien Swaan, Manon Haverkate, Madelief Mollers, Mart Stein, Sandra Kengne Kanga Mobou, Jeroen van Kampen, Jolanda Voermans, Aura Timen, Corine GeurtsvanKessel, Annemiek van der Eijk, Richard Molenkamp, Marion Koopmans, on behalf of the Dutch national COVID-19 response team. |
| 129 | EPI_ISL_414433 | hCoV-19/Netherlands/NoordHolland_1/2020    | <i>Homo sapiens</i> | Europe / Netherlands / Noord Holland | 2020-03-03 | Dutch COVID-19 response team | Erasmus Medical Center | David Nieuwenhuijse, Bas Oude Munnink, Reina Sikkema, Claudia Schapendonk, Irina Chestakova, Anne van der Linden, Mark Pronk, Pascal Lexmond, Corien Swaan, Manon Haverkate, Madelief Mollers, Mart Stein, Sandra Kengne Kanga Mobou, Jeroen van Kampen, Jolanda Voermans, Aura Timen, Corine GeurtsvanKessel, Annemiek van der Eijk, Richard Molenkamp, Marion Koopmans, on behalf of the Dutch national COVID-19 response team. |
| 129 | EPI_ISL_414439 | hCoV-19/Netherlands/Utrecht_5/2020         | <i>Homo sapiens</i> | Europe / Netherlands / Utrecht       | 2020-03-02 | Dutch COVID-19 response team | Erasmus Medical Center | David Nieuwenhuijse, Bas Oude Munnink, Reina Sikkema, Claudia Schapendonk, Irina Chestakova, Anne van der Linden, Mark Pronk, Pascal Lexmond, Corien Swaan, Manon Haverkate, Madelief Mollers, Mart Stein, Sandra Kengne Kanga Mobou, Jeroen van Kampen, Jolanda Voermans, Aura Timen, Corine GeurtsvanKessel, Annemiek van der Eijk, Richard Molenkamp, Marion Koopmans, on behalf of the Dutch national COVID-19 response team. |
| 129 | EPI_ISL_414446 | hCoV-19/Netherlands/ZuidHolland_10/2020    | <i>Homo sapiens</i> | Europe / Netherlands / Zuid Holland  | 2020-03-03 | Dutch COVID-19 response team | Erasmus Medical Center | David Nieuwenhuijse, Bas Oude Munnink, Reina Sikkema, Claudia Schapendonk, Irina Chestakova, Anne van der Linden, Mark Pronk, Pascal Lexmond, Corien Swaan, Manon Haverkate, Madelief Mollers, Mart Stein, Sandra Kengne Kanga Mobou, Jeroen van Kampen, Jolanda Voermans, Aura Timen, Corine GeurtsvanKessel, Annemiek van der Eijk, Richard Molenkamp, Marion Koopmans, on behalf of the Dutch national COVID-19 response team. |
| 129 | EPI_ISL_415463 | hCoV-19/Netherlands/Gelderland_3/2020      | <i>Homo sapiens</i> | Europe / Netherlands / Gelderland    | 2020-03-09 | Dutch COVID-19 response team | Erasmus Medical Center | David Nieuwenhuijse, Bas Oude Munnink, Reina Sikkema, Claudia Schapendonk, Irina Chestakova, Anne van der Linden, Mark Pronk, Pascal Lexmond, Corien Swaan, Manon Haverkate, Madelief Mollers, Mart Stein, Sandra Kengne Kanga Mobou, Jeroen van Kampen, Jolanda Voermans, Aura Timen, Corine GeurtsvanKessel, Annemiek van der Eijk, Richard Molenkamp, Marion Koopmans, on behalf of the Dutch national COVID-19 response team. |
| 129 | EPI_ISL_415496 | hCoV-19/Netherlands/NA_7/2020              | <i>Homo sapiens</i> | Europe / Netherlands                 | 2020-03-09 | Dutch COVID-19 response team | Erasmus Medical Center | David Nieuwenhuijse, Bas Oude Munnink, Reina Sikkema, Claudia Schapendonk, Irina Chestakova, Anne van der Linden, Mark Pronk, Pascal Lexmond, Corien Swaan, Manon Haverkate, Madelief Mollers, Mart Stein, Sandra Kengne Kanga Mobou, Jeroen van Kampen, Jolanda Voermans, Aura Timen, Corine GeurtsvanKessel, Annemiek van der Eijk, Richard Molenkamp, Marion Koopmans, on behalf of the Dutch national COVID-19 response team. |

|     |                |                                     |       |                     |                                      |            |                               |                        |                                                                                                                                                                                                                                                                                                                                                                                                                                   |
|-----|----------------|-------------------------------------|-------|---------------------|--------------------------------------|------------|-------------------------------|------------------------|-----------------------------------------------------------------------------------------------------------------------------------------------------------------------------------------------------------------------------------------------------------------------------------------------------------------------------------------------------------------------------------------------------------------------------------|
| 129 | EPI_ISL_415502 | 19/Netherlands/NoordBrabant_45/2020 | hCoV- | <i>Homo sapiens</i> | Europe / Netherlands / Noord Brabant | 2020-03-09 | Dutch COVID-19 response team  | Erasmus Medical Center | David Nieuwenhuijse, Bas Oude Munnink, Reina Sikkema, Claudia Schapendonk, Irina Chestakova, Anne van der Linden, Mark Pronk, Pascal Lexmond, Corien Swaan, Manon Haverkate, Madelief Mollers, Mart Stein, Sandra Kengne Kanga Mobou, Jeroen van Kampen, Jolanda Voermans, Aura Timen, Corine GeurtsvanKessel, Annemiek van der Eijk, Richard Molenkamp, Marion Koopmans, on behalf of the Dutch national COVID-19 response team. |
| 129 | EPI_ISL_415514 | 19/Netherlands/NoordBrabant_58/2020 | hCoV- | <i>Homo sapiens</i> | Europe / Netherlands / Noord Brabant | 2020-03-11 | Dutch COVID-19 response team  | Erasmus Medical Center | David Nieuwenhuijse, Bas Oude Munnink, Reina Sikkema, Claudia Schapendonk, Irina Chestakova, Anne van der Linden, Mark Pronk, Pascal Lexmond, Corien Swaan, Manon Haverkate, Madelief Mollers, Mart Stein, Sandra Kengne Kanga Mobou, Jeroen van Kampen, Jolanda Voermans, Aura Timen, Corine GeurtsvanKessel, Annemiek van der Eijk, Richard Molenkamp, Marion Koopmans, on behalf of the Dutch national COVID-19 response team. |
| 129 | EPI_ISL_415523 | 19/Netherlands/NoordBrabant_67/2020 | hCoV- | <i>Homo sapiens</i> | Europe / Netherlands / Noord Brabant | 2020       | Dutch COVID-19 response team  | Erasmus Medical Center | David Nieuwenhuijse, Bas Oude Munnink, Reina Sikkema, Claudia Schapendonk, Irina Chestakova, Anne van der Linden, Mark Pronk, Pascal Lexmond, Corien Swaan, Manon Haverkate, Madelief Mollers, Mart Stein, Sandra Kengne Kanga Mobou, Jeroen van Kampen, Jolanda Voermans, Aura Timen, Corine GeurtsvanKessel, Annemiek van der Eijk, Richard Molenkamp, Marion Koopmans, on behalf of the Dutch national COVID-19 response team. |
| 129 | EPI_ISL_415529 | 19/Netherlands/ZuidHolland_25/2020  | hCoV- | <i>Homo sapiens</i> | Europe / Netherlands / Zuid Holland  | 2020-03-09 | Dutch COVID-19 response team  | Erasmus Medical Center | David Nieuwenhuijse, Bas Oude Munnink, Reina Sikkema, Claudia Schapendonk, Irina Chestakova, Anne van der Linden, Mark Pronk, Pascal Lexmond, Corien Swaan, Manon Haverkate, Madelief Mollers, Mart Stein, Sandra Kengne Kanga Mobou, Jeroen van Kampen, Jolanda Voermans, Aura Timen, Corine GeurtsvanKessel, Annemiek van der Eijk, Richard Molenkamp, Marion Koopmans, on behalf of the Dutch national COVID-19 response team. |
| 129 | EPI_ISL_415533 | 19/Netherlands/ZuidHolland_29/2020  | hCoV- | <i>Homo sapiens</i> | Europe / Netherlands / Zuid Holland  | 2020-03-09 | Dutch COVID-19 response team  | Erasmus Medical Center | David Nieuwenhuijse, Bas Oude Munnink, Reina Sikkema, Claudia Schapendonk, Irina Chestakova, Anne van der Linden, Mark Pronk, Pascal Lexmond, Corien Swaan, Manon Haverkate, Madelief Mollers, Mart Stein, Sandra Kengne Kanga Mobou, Jeroen van Kampen, Jolanda Voermans, Aura Timen, Corine GeurtsvanKessel, Annemiek van der Eijk, Richard Molenkamp, Marion Koopmans, on behalf of the Dutch national COVID-19 response team. |
| 130 | EPI_ISL_413589 | 19/Netherlands/Utrecht_1363628/2020 | hCoV- | <i>Homo sapiens</i> | Europe / Netherlands / Utrecht       | 2020-03-01 | MHC Utrecht                   | Erasmus Medical Center | David Nieuwenhuijse, Bas Oude Munnink, Reina Sikkema, Claudia Schapendonk, Irina Chestakova, Anne van der Linden, Mark Pronk, Pascal Lexmond, Corien Swaan, Manon Haverkate, Madelief Mollers, Mart Stein, Sandra Kengne Kanga Mobou, Jeroen van Kampen, Jolanda Voermans, Aura Timen, Corine GeurtsvanKessel, Annemiek van der Eijk, Richard Molenkamp, Marion Koopmans, on behalf of the Dutch national COVID-19 response team. |
| 131 | EPI_ISL_413593 | 19/Luxembourg/Lux1/2020             | hCoV- | <i>Homo sapiens</i> | Europe / Luxembourg                  | 2020-02-29 | Laboratoire National de Santé | Erasmus Medical Center | David Nieuwenhuijse, Bas Oude Munnink, Reina Sikkema, Claudia Schapendonk, Irina Chestakova, Anne van der Linden, Mark Pronk, Pascal Lexmond, T. Abdelrahman, G. Fournier, J. Mossong, T. Nguyen, Jeroen van Kampen, Jolanda Voermans, Corine GeurtsvanKessel, Annemiek van der Eijk, Richard Molenkamp, Marion Koopmans, on behalf of the Dutch national COVID-19 response team.                                                 |

|     |                |                                   |                     |                             |            |                                                                                                                |                                                                                                                         |                                                                                                                                                                                                                                                                                             |
|-----|----------------|-----------------------------------|---------------------|-----------------------------|------------|----------------------------------------------------------------------------------------------------------------|-------------------------------------------------------------------------------------------------------------------------|---------------------------------------------------------------------------------------------------------------------------------------------------------------------------------------------------------------------------------------------------------------------------------------------|
| 132 | EPI_ISL_413602 | hCoV-19/Finland/FIN03032020A/2020 | <i>Homo sapiens</i> | Europe / Finland / Helsinki | 2020-03-03 | Department of Virology and Immunology, University of Helsinki and Helsinki University Hospital, Huslab Finland | Department of Virology, Faculty of Medicine, University of Helsinki, Helsinki, Finland                                  | Teemu Smura, Hannimari Kallio-Kokko, Olli Vapalahti                                                                                                                                                                                                                                         |
| 133 | EPI_ISL_413603 | hCoV-19/Finland/FIN03032020B/2020 | <i>Homo sapiens</i> | Europe / Finland / Helsinki | 2020-03-03 | Department of Virology and Immunology, University of Helsinki and Helsinki University Hospital, Huslab Finland | Department of Virology, Faculty of Medicine, University of Helsinki, Helsinki, Finland                                  | Teemu Smura, Hannimari Kallio-Kokko, Olli Vapalahti                                                                                                                                                                                                                                         |
| 134 | EPI_ISL_413604 | hCoV-19/Finland/FIN03032020C/2020 | <i>Homo sapiens</i> | Europe / Finland / Helsinki | 2020-03-03 | Department of Virology and Immunology, University of Helsinki and Helsinki University Hospital, Huslab Finland | Department of Virology, Faculty of Medicine, University of Helsinki, Helsinki, Finland                                  | Teemu Smura, Hannimari Kallio-Kokko, Olli Vapalahti                                                                                                                                                                                                                                         |
| 135 | EPI_ISL_413606 | hCoV-19/USA/CruiseA-1/2020        | <i>Homo sapiens</i> | North America / USA         | 2020-02-17 | unknown                                                                                                        | Pathogen Discovery, Respiratory Viruses Branch, Division of Viral Diseases, Centers for Diseases Control and Prevention | Anna Uehara, Ying Tao, Clinton R. Paden, Krista Queen, Jing Zhang, Yan Li, Mary S. Keckler, Alison S Laufer Halpin, Haibin Wang, Jasmine Padilla, Justin Lee, Christopher A. Elkins, Susan I. Gerber, Suxiang Tong                                                                          |
| 136 | EPI_ISL_413607 | hCoV-19/USA/CruiseA-2/2020        | <i>Homo sapiens</i> | North America / USA         | 2020-02-18 | unknown                                                                                                        | Pathogen Discovery, Respiratory Viruses Branch, Division of Viral Diseases, Centers for Diseases Control and Prevention | Anna Uehara, Ying Tao, Clinton R. Paden, Krista Queen, Jing Zhang, Yan Li, Mary S. Keckler, Alison S Laufer Halpin, Haibin Wang, Jasmine Padilla, Justin Lee, Christopher A. Elkins, Susan I. Gerber, Suxiang Tong                                                                          |
| 137 | EPI_ISL_413609 | hCoV-19/USA/CruiseA-4/2020        | <i>Homo sapiens</i> | North America / USA         | 2020-02-21 | unknown                                                                                                        | Pathogen Discovery, Respiratory Viruses Branch, Division of Viral Diseases, Centers for Diseases Control and Prevention | Anna Uehara, Ying Tao, Clinton R. Paden, Krista Queen, Jing Zhang, Yan Li, Mary S. Keckler, Alison S Laufer Halpin, Haibin Wang, Jasmine Padilla, Justin Lee, Christopher A. Elkins, Susan I. Gerber, Suxiang Tong                                                                          |
| 138 | EPI_ISL_413611 | hCoV-19/USA/CruiseA-6/2020        | <i>Homo sapiens</i> | North America / USA         | 2020-02-21 | unknown                                                                                                        | Pathogen Discovery, Respiratory Viruses Branch, Division of Viral Diseases, Centers for Diseases Control and Prevention | Anna Uehara, Ying Tao, Clinton R. Paden, Krista Queen, Jing Zhang, Yan Li, Mary S. Keckler, Alison S Laufer Halpin, Haibin Wang, Jasmine Padilla, Justin Lee, Christopher A. Elkins, Susan I. Gerber, Suxiang Tong                                                                          |
| 139 | EPI_ISL_413612 | hCoV-19/USA/CruiseA-7/2020        | <i>Homo sapiens</i> | North America / USA         | 2020-02-17 | unknown                                                                                                        | Pathogen Discovery, Respiratory Viruses Branch, Division of Viral Diseases, Centers for Diseases Control and Prevention | Ying Tao, Clinton R. Paden, Krista Queen, Anna Uehara, Jing Zhang, Yan Li, Haibin Wang, Shifaq Kamili, Xiaoyan Lu, Brian Lynch, Senthil Kumar K. Sakthivel, Brett L. Whitaker, Lijuan Wang, Janna' R. Murray, Jasmine Padilla, Justin Lee, Susan I. Gerber, Stephen Lindstrom, Suxiang Tong |
| 140 | EPI_ISL_413613 | hCoV-19/USA/CruiseA-8/2020        | <i>Homo sapiens</i> | North America / USA         | 2020-02-17 | unknown                                                                                                        | Pathogen Discovery, Respiratory Viruses Branch, Division of Viral Diseases, Centers for Diseases Control and Prevention | Ying Tao, Clinton R. Paden, Krista Queen, Anna Uehara, Jing Zhang, Yan Li, Haibin Wang, Shifaq Kamili, Xiaoyan Lu, Brian Lynch, Senthil Kumar K. Sakthivel, Brett L. Whitaker, Lijuan Wang, Janna' R. Murray, Jasmine Padilla, Justin Lee, Susan I. Gerber, Stephen Lindstrom, Suxiang Tong |
| 141 | EPI_ISL_413615 | hCoV-19/USA/CruiseA-10/2020       | <i>Homo sapiens</i> | North America / USA         | 2020-02-17 | unknown                                                                                                        | Pathogen Discovery, Respiratory Viruses Branch, Division of Viral Diseases, Centers for Diseases Control and Prevention | Ying Tao, Clinton R. Paden, Krista Queen, Anna Uehara, Jing Zhang, Yan Li, Haibin Wang, Shifaq Kamili, Xiaoyan Lu, Brian Lynch, Senthil Kumar K. Sakthivel, Brett L. Whitaker, Lijuan Wang, Janna' R. Murray, Jasmine Padilla, Justin Lee, Susan I. Gerber, Stephen Lindstrom, Suxiang Tong |
| 142 | EPI_ISL_413616 | hCoV-19/USA/CruiseA-11/2020       | <i>Homo sapiens</i> | North America / USA         | 2020-02-17 | unknown                                                                                                        | Pathogen Discovery, Respiratory Viruses Branch, Division of Viral Diseases, Centers for Diseases Control and Prevention | Ying Tao, Clinton R. Paden, Krista Queen, Anna Uehara, Jing Zhang, Yan Li, Haibin Wang, Shifaq Kamili, Xiaoyan Lu, Brian Lynch, Senthil Kumar K. Sakthivel, Brett L. Whitaker, Lijuan Wang, Janna' R. Murray, Jasmine Padilla, Justin Lee, Susan I. Gerber, Stephen Lindstrom, Suxiang Tong |
| 143 | EPI_ISL_413617 | hCoV-19/USA/CruiseA-12/2020       | <i>Homo sapiens</i> | North America / USA         | 2020-02-20 | unknown                                                                                                        | Pathogen Discovery, Respiratory Viruses Branch, Division of Viral Diseases, Centers for Diseases Control and Prevention | Ying Tao, Clinton R. Paden, Krista Queen, Anna Uehara, Jing Zhang, Yan Li, Haibin Wang, Shifaq Kamili, Xiaoyan Lu, Brian Lynch, Senthil Kumar K. Sakthivel, Brett L. Whitaker, Lijuan Wang, Janna' R. Murray, Jasmine Padilla, Justin Lee, Susan I. Gerber, Stephen Lindstrom, Suxiang Tong |

|     |                |                             |                     |                     |            |                                                              |                                                                                                                         |                                                                                                                                                                                                                                                                                            |
|-----|----------------|-----------------------------|---------------------|---------------------|------------|--------------------------------------------------------------|-------------------------------------------------------------------------------------------------------------------------|--------------------------------------------------------------------------------------------------------------------------------------------------------------------------------------------------------------------------------------------------------------------------------------------|
| 144 | EPI_ISL_413619 | hCoV-19/USA/CruiseA-14/2020 | <i>Homo sapiens</i> | North America / USA | 2020-02-25 | unknown                                                      | Pathogen Discovery, Respiratory Viruses Branch, Division of Viral Diseases, Centers for Diseases Control and Prevention | Clinton R. Paden, Ying Tao, Krista Queen, Anna Uehara, Jing Zhang, Yan Li, Haibin Wang, Shifaq Kamili, Xiaoyan Lu, Brian Lynch, Senthil Kumar K. Sakhivel, Brett L. Whitaker, Lijuan Wang, Janna' R. Murray, Jasmine Padilla, Justin Lee, Susan I. Gerber, Stephen Lindstrom, Suxiang Tong |
| 145 | EPI_ISL_413622 | hCoV-19/USA/CruiseA-17/2020 | <i>Homo sapiens</i> | North America / USA | 2020-02-24 | unknown                                                      | Pathogen Discovery, Respiratory Viruses Branch, Division of Viral Diseases, Centers for Diseases Control and Prevention | Clinton R. Paden, Ying Tao, Krista Queen, Anna Uehara, Jing Zhang, Yan Li, Haibin Wang, Shifaq Kamili, Xiaoyan Lu, Brian Lynch, Senthil Kumar K. Sakhivel, Brett L. Whitaker, Lijuan Wang, Janna' R. Murray, Jasmine Padilla, Justin Lee, Susan I. Gerber, Stephen Lindstrom, Suxiang Tong |
| 146 | EPI_ISL_413647 | hCoV-19/Portugal/CV62/2020  | <i>Homo sapiens</i> | Europe / Portugal   | 2020-03-01 | Centro Hospital do Porto, E.P.E. - H. Geral de Santo Antonio | Instituto Nacional de Saude (INSA)                                                                                      | Raquel Guimar, Inês Costa, Pedro Pechirra, Joana Mendonça, Luís Vieira, Helena Ramos, Joana Isidro, Vítor Borges, João Paulo Gomes                                                                                                                                                         |
| 147 | EPI_ISL_413648 | hCoV-19/Portugal/CV63/2020  | <i>Homo sapiens</i> | Europe / Portugal   | 2020-03-01 | Centro Hospitalar e Universitário de Sao Joao, Porto         | Instituto Nacional de Saude (INSA)                                                                                      | Raquel Guimar, Inês Costa, Pedro Pechirra, Joana Mendonça, Luís Vieira, João Tiago Guimarães, Joana Isidro, Vítor Borges, João Paulo Gomes                                                                                                                                                 |
| 148 | EPI_ISL_413691 | hCoV-19/China/WF0001/2020   | <i>Homo sapiens</i> | Asia / China        | 2020-01    | Weifang Center for Disease Control and Prevention            | Weifang Center for Disease Control and Prevention & BGI-Shenzhen                                                        | Qing Nie, Xingguang Li, Erik M Volz, Han Fu, Haowei Wang, Xiaoyue Xi, Wei Chen, Dehui Liu, Yingying Chen, Mengmeng Tian, Wei Tan, Junjie Zai, Wanying Sun, Jiandong Li, Junhua Li                                                                                                          |
| 148 | EPI_ISL_413746 | hCoV-19/China/WF0016/2020   | <i>Homo sapiens</i> | Asia / China        | 2020-02    | Weifang Center for Disease Control and Prevention            | Weifang Center for Disease Control and Prevention & BGI-Shenzhen                                                        | Qing Nie, Xingguang Li, Erik M Volz, Han Fu, Haowei Wang, Xiaoyue Xi, Wei Chen, Dehui Liu, Yingying Chen, Mengmeng Tian, Wei Tan, Junjie Zai, Wanying Sun, Jiandong Li, Junhua Li                                                                                                          |
| 148 | EPI_ISL_413748 | hCoV-19/China/WF0018/2020   | <i>Homo sapiens</i> | Asia / China        | 2020-02    | Weifang Center for Disease Control and Prevention            | Weifang Center for Disease Control and Prevention & BGI-Shenzhen                                                        | Qing Nie, Xingguang Li, Erik M Volz, Han Fu, Haowei Wang, Xiaoyue Xi, Wei Chen, Dehui Liu, Yingying Chen, Mengmeng Tian, Wei Tan, Junjie Zai, Wanying Sun, Jiandong Li, Junhua Li                                                                                                          |
| 149 | EPI_ISL_413692 | hCoV-19/China/WF0002/2020   | <i>Homo sapiens</i> | Asia / China        | 2020-01    | Weifang Center for Disease Control and Prevention            | Weifang Center for Disease Control and Prevention & BGI-Shenzhen                                                        | Qing Nie, Xingguang Li, Erik M Volz, Han Fu, Haowei Wang, Xiaoyue Xi, Wei Chen, Dehui Liu, Yingying Chen, Mengmeng Tian, Wei Tan, Junjie Zai, Wanying Sun, Jiandong Li, Junhua Li                                                                                                          |
| 149 | EPI_ISL_413694 | hCoV-19/China/WF0004/2020   | <i>Homo sapiens</i> | Asia / China        | 2020-01    | Weifang Center for Disease Control and Prevention            | Weifang Center for Disease Control and Prevention & BGI-Shenzhen                                                        | Qing Nie, Xingguang Li, Erik M Volz, Han Fu, Haowei Wang, Xiaoyue Xi, Wei Chen, Dehui Liu, Yingying Chen, Mengmeng Tian, Wei Tan, Junjie Zai, Wanying Sun, Jiandong Li, Junhua Li                                                                                                          |
| 150 | EPI_ISL_413693 | hCoV-19/China/WF0003/2020   | <i>Homo sapiens</i> | Asia / China        | 2020-01    | Weifang Center for Disease Control and Prevention            | Weifang Center for Disease Control and Prevention & BGI-Shenzhen                                                        | Qing Nie, Xingguang Li, Erik M Volz, Han Fu, Haowei Wang, Xiaoyue Xi, Wei Chen, Dehui Liu, Yingying Chen, Mengmeng Tian, Wei Tan, Junjie Zai, Wanying Sun, Jiandong Li, Junhua Li                                                                                                          |
| 151 | EPI_ISL_413697 | hCoV-19/China/WF0012/2020   | <i>Homo sapiens</i> | Asia / China        | 2020-02    | Weifang Center for Disease Control and Prevention            | Weifang Center for Disease Control and Prevention & BGI-Shenzhen                                                        | Qing Nie, Xingguang Li, Erik M Volz, Han Fu, Haowei Wang, Xiaoyue Xi, Wei Chen, Dehui Liu, Yingying Chen, Mengmeng Tian, Wei Tan, Junjie Zai, Wanying Sun, Jiandong Li, Junhua Li                                                                                                          |
| 151 | EPI_ISL_413761 | hCoV-19/China/WF0026/2020   | <i>Homo sapiens</i> | Asia / China        | 2020-02    | Weifang Center for Disease Control and Prevention            | Weifang Center for Disease Control and Prevention & BGI-Shenzhen                                                        | Qing Nie, Xingguang Li, Erik M Volz, Han Fu, Haowei Wang, Xiaoyue Xi, Wei Chen, Dehui Liu, Yingying Chen, Mengmeng Tian, Wei Tan, Junjie Zai, Wanying Sun, Jiandong Li, Junhua Li                                                                                                          |
| 152 | EPI_ISL_413711 | hCoV-19/China/WF0014/2020   | <i>Homo sapiens</i> | Asia / China        | 2020-02    | Weifang Center for Disease Control and Prevention            | Weifang Center for Disease Control and Prevention & BGI-Shenzhen                                                        | Qing Nie, Xingguang Li, Erik M Volz, Han Fu, Haowei Wang, Xiaoyue Xi, Wei Chen, Dehui Liu, Yingying Chen, Mengmeng Tian, Wei Tan, Junjie Zai, Wanying Sun, Jiandong Li, Junhua Li                                                                                                          |
| 153 | EPI_ISL_413749 | hCoV-19/China/WF0019/2020   | <i>Homo sapiens</i> | Asia / China        | 2020-02    | Weifang Center for Disease Control and Prevention            | Weifang Center for Disease Control and Prevention & BGI-Shenzhen                                                        | Qing Nie, Xingguang Li, Erik M Volz, Han Fu, Haowei Wang, Xiaoyue Xi, Wei Chen, Dehui Liu, Yingying Chen, Mengmeng Tian, Wei Tan, Junjie Zai, Wanying Sun, Jiandong Li, Junhua Li                                                                                                          |
| 154 | EPI_ISL_413791 | hCoV-19/China/WF0028/2020   | <i>Homo sapiens</i> | Asia / China        | 2020-02    | Weifang Center for Disease Control and Prevention            | Weifang Center for Disease Control and Prevention & BGI-Shenzhen                                                        | Qing Nie, Xingguang Li, Erik M Volz, Han Fu, Haowei Wang, Xiaoyue Xi, Wei Chen, Dehui Liu, Yingying Chen, Mengmeng Tian, Wei Tan, Junjie Zai, Wanying Sun, Jiandong Li, Junhua Li                                                                                                          |
| 155 | EPI_ISL_413809 | hCoV-19/China/WF0029/2020   | <i>Homo sapiens</i> | Asia / China        | 2020-02    | Weifang Center for Disease Control and Prevention            | Weifang Center for Disease Control and Prevention & BGI-Shenzhen                                                        | Qing Nie, Xingguang Li, Erik M Volz, Han Fu, Haowei Wang, Xiaoyue Xi, Wei Chen, Dehui Liu, Yingying Chen, Mengmeng Tian, Wei Tan, Junjie Zai, Wanying Sun, Jiandong Li, Junhua Li                                                                                                          |

|     |                |                                         |                     |                                                  |            |                                                                                                                   |                                                                                                            |                                                                                                                                                                                                                                                                                                                                                                                                                                                |
|-----|----------------|-----------------------------------------|---------------------|--------------------------------------------------|------------|-------------------------------------------------------------------------------------------------------------------|------------------------------------------------------------------------------------------------------------|------------------------------------------------------------------------------------------------------------------------------------------------------------------------------------------------------------------------------------------------------------------------------------------------------------------------------------------------------------------------------------------------------------------------------------------------|
| 156 | EPI_ISL_413854 | hCoV-19/Guangdong/2020XN4475-P0042/2020 | <i>Homo sapiens</i> | Asia / China / Guangdong                         | 2020-01-30 | Guangdong Provincial Institution of Public Health, Guangdong Provincial Center for Disease Control and Prevention | Guangdong Provincial Institution of Public Health                                                          | Jing Lu, Louis du Plessis, Liu Zhe, Jiufeng Sun, Sarah François, Huifang Lin, Moritz Kraemer, Jingju Peng, Qianlin Xiong, Runyu Yuan, Lilian Zeng, Pingping Zhou, Chuming Liang, Tao Liu, Wei Li, Juan Su, Huanying Zheng, Kang Min, Song Tie, Bo Peng, Shisong Fang, Wenzhe Su, Kuibiao Li, Ruilin Sun, Ru bai, Xi Tang, Minfeng Liang, Nuno Faria, Josh Quick, Andrew Rambaut, Verity Hill, Wenjun Ma, Nick Loman, Oliver Pybus, Changwen Ke |
| 157 | EPI_ISL_413857 | hCoV-19/Guangdong/2020XN4448-P0002/2020 | <i>Homo sapiens</i> | Asia / China / Guangdong                         | 2020-01-31 | Guangdong Provincial Institution of Public Health, Guangdong Provincial Center for Disease Control and Prevention | Guangdong Provincial Institution of Public Health                                                          | Jing Lu, Louis du Plessis, Liu Zhe, Jiufeng Sun, Sarah François, Huifang Lin, Moritz Kraemer, Jingju Peng, Qianlin Xiong, Runyu Yuan, Lilian Zeng, Pingping Zhou, Chuming Liang, Tao Liu, Wei Li, Juan Su, Huanying Zheng, Kang Min, Song Tie, Bo Peng, Shisong Fang, Wenzhe Su, Kuibiao Li, Ruilin Sun, Ru bai, Xi Tang, Minfeng Liang, Nuno Faria, Josh Quick, Andrew Rambaut, Verity Hill, Wenjun Ma, Nick Loman, Oliver Pybus, Changwen Ke |
| 158 | EPI_ISL_413858 | hCoV-19/Guangdong/2020XN4459-P0041/2020 | <i>Homo sapiens</i> | Asia / China / Guangdong                         | 2020-01-30 | Guangdong Provincial Institution of Public Health, Guangdong Provincial Center for Disease Control and Prevention | Guangdong Provincial Institution of Public Health                                                          | Jing Lu, Louis du Plessis, Liu Zhe, Jiufeng Sun, Sarah François, Huifang Lin, Moritz Kraemer, Jingju Peng, Qianlin Xiong, Runyu Yuan, Lilian Zeng, Pingping Zhou, Chuming Liang, Tao Liu, Wei Li, Juan Su, Huanying Zheng, Kang Min, Song Tie, Bo Peng, Shisong Fang, Wenzhe Su, Kuibiao Li, Ruilin Sun, Ru bai, Xi Tang, Minfeng Liang, Nuno Faria, Josh Quick, Andrew Rambaut, Verity Hill, Wenjun Ma, Nick Loman, Oliver Pybus, Changwen Ke |
| 159 | EPI_ISL_413861 | hCoV-19/Guangdong/GD2020080-P0010/2020  | <i>Homo sapiens</i> | Asia / China / Guangdong                         | 2020-02-01 | Guangdong Provincial Institution of Public Health, Guangdong Provincial Center for Disease Control and Prevention | Guangdong Provincial Institution of Public Health                                                          | Jing Lu, Louis du Plessis, Liu Zhe, Jiufeng Sun, Sarah François, Huifang Lin, Moritz Kraemer, Jingju Peng, Qianlin Xiong, Runyu Yuan, Lilian Zeng, Pingping Zhou, Chuming Liang, Tao Liu, Wei Li, Juan Su, Huanying Zheng, Kang Min, Song Tie, Bo Peng, Shisong Fang, Wenzhe Su, Kuibiao Li, Ruilin Sun, Ru bai, Xi Tang, Minfeng Liang, Nuno Faria, Josh Quick, Andrew Rambaut, Verity Hill, Wenjun Ma, Nick Loman, Oliver Pybus, Changwen Ke |
| 160 | EPI_ISL_413863 | hCoV-19/Guangdong/GD2020087-P0008/2020  | <i>Homo sapiens</i> | Asia / China / Guangdong                         | 2020-02-01 | Guangdong Provincial Institution of Public Health, Guangdong Provincial Center for Disease Control and Prevention | Guangdong Provincial Institution of Public Health                                                          | Jing Lu, Louis du Plessis, Liu Zhe, Jiufeng Sun, Sarah François, Huifang Lin, Moritz Kraemer, Jingju Peng, Qianlin Xiong, Runyu Yuan, Lilian Zeng, Pingping Zhou, Chuming Liang, Tao Liu, Wei Li, Juan Su, Huanying Zheng, Kang Min, Song Tie, Bo Peng, Shisong Fang, Wenzhe Su, Kuibiao Li, Ruilin Sun, Ru bai, Xi Tang, Minfeng Liang, Nuno Faria, Josh Quick, Andrew Rambaut, Verity Hill, Wenjun Ma, Nick Loman, Oliver Pybus, Changwen Ke |
| 161 | EPI_ISL_413928 | hCoV-19/USA/CA-CDPH-UC9/2020            | <i>Homo sapiens</i> | North America / USA / California / San Francisco | 2020-03-05 | California Department of Public Health                                                                            | Chiu Laboratory UCSF-Abbott Viral Diagnostics and Discovery Center                                         | Xianding Deng, Scot Federman, Guixia Yu, Chao-Yang Pan, Hugo Guevara, Alicia Sotomayor-Gonzalez, Allan Gopez, Wei Gu, Steve Miller, Debra A. Wadford, and Charles Y. Chiu                                                                                                                                                                                                                                                                      |
| 162 | EPI_ISL_413931 | hCoV-19/USA/UC-CDPH-UC11/2020           | <i>Homo sapiens</i> | North America / USA / California / San Francisco | 2020-03-05 | California Department of Public Health                                                                            | Chiu Laboratory UCSF-Abbott Viral Diagnostics and Discovery Center University of California, San Francisco | Xianding Deng, Scot Federman, Guixia Yu, Chao-Yang Pan, Hugo Guevara, Alicia Sotomayor-Gonzalez, Allan Gopez, Wei Gu, Steve Miller, Debra A. Wadford, and Charles Y. Chiu                                                                                                                                                                                                                                                                      |
| 163 | EPI_ISL_413996 | hCoV-19/Switzerland/TI9486/2020         | <i>Homo sapiens</i> | Europe / Switzerland / Tessin                    | 2020-02-24 | Laboratoire de Virologie, HUG                                                                                     | Swiss National Reference Centre for Influenza                                                              | LAUBSCHER Florian et al.                                                                                                                                                                                                                                                                                                                                                                                                                       |
| 164 | EPI_ISL_413997 | hCoV-19/Switzerland/GE3895/2020         | <i>Homo sapiens</i> | Europe / Switzerland / Geneva                    | 2020-02-26 | Laboratoire de Virologie, HUG                                                                                     | Swiss National Reference Centre for Influenza                                                              | LAUBSCHER Florian et al.                                                                                                                                                                                                                                                                                                                                                                                                                       |
| 165 | EPI_ISL_413999 | hCoV-19/Switzerland/AG0361/2020         | <i>Homo sapiens</i> | Europe / Switzerland / Argovie                   | 2020-02-27 | Laboratoire de Virologie, HUG                                                                                     | Swiss National Reference Centre for Influenza                                                              | LAUBSCHER Florian et al.                                                                                                                                                                                                                                                                                                                                                                                                                       |
| 166 | EPI_ISL_414012 | hCoV-19/England/200990723/2020          | <i>Homo sapiens</i> | Europe / United Kingdom / England                | 2020-02-27 | Respiratory Virus Unit, Microbiology Services Colindale, Public Health England                                    | Respiratory Virus Unit, Microbiology Services Colindale, Public Health England                             | Monica Galiano, Shahjahan Miah, Angie Lackenby, Omolola Akinbami, Tiina Talts, Leena Bhaw, Richard Myers, Steven Platt, Kirstin Edwards, Jonathan Hubb, Joanna Ellis, Maria Zambon                                                                                                                                                                                                                                                             |

|     |                |                                       |                     |                                                |            |                                                                                                                 |                                                                                  |                                                                                                                                                                                                                                                                                                                                                                                                 |
|-----|----------------|---------------------------------------|---------------------|------------------------------------------------|------------|-----------------------------------------------------------------------------------------------------------------|----------------------------------------------------------------------------------|-------------------------------------------------------------------------------------------------------------------------------------------------------------------------------------------------------------------------------------------------------------------------------------------------------------------------------------------------------------------------------------------------|
| 167 | EPI_ISL_414014 | hCoV-19/Brazil/SPBR-03/2020           | <i>Homo sapiens</i> | South America / Brazil / Sao Paulo             | 2020-03-02 | Hospital Israelita Albert Einstein                                                                              | Instituto Adolfo Lutz, Interdisciplinary Procedures Center, Strategic Laboratory | Claudio Tavares Sacchi, Claudia Regina Gonçalves, Katia Correia dos Santos, Carlos Henrique Camargo, Maria do Carmo Sampaio Tavares Timenetsky, Terezinha Maria de Paiva, Ester Cerdeira Sabino                                                                                                                                                                                                 |
| 167 | EPI_ISL_414017 | hCoV-19/Brazil/SPBR-04/2020           | <i>Homo sapiens</i> | South America / Brazil / Sao Paulo             | 2020-03-04 | Hospital São Joaquim Beneficencia Portuguesa                                                                    | Instituto Adolfo Lutz, Interdisciplinary Procedures Center, Strategic Laboratory | Claudio Tavares Sacchi, Claudia Regina Gonçalves, Fabiana Cristina Pereira dos Santos, Carlos Henrique Camargo, Maria do Carmo Sampaio Tavares Timenetsky, Daniela Bernardes Borges da Silva, Terezinha Maria de Paiva, Ester Cerdeira Sabino                                                                                                                                                   |
| 167 | EPI_ISL_416028 | hCoV-19/Brazil/SPBR-07/2020           | <i>Homo sapiens</i> | South America / Brazil / Sao Paulo / Sao Paulo | 2020-03-03 | National Influenza Center - Instituto Adolfo Lutz                                                               | Instituto Adolfo Lutz, Interdisciplinary Procedures Center, Strategic Laboratory | Claudio Tavares Sacchi, Claudia Regina Gonçalves, Carlos Henrique Camargo, Fabiana Cristina Pereira dos Santos, Daniela Bernardes Borges da Silva, Simone Guadagnucci Morillo, Adriano Abbud, Adriana Bugno, Maria do Carmo Sampaio Tavares Timenetsky, Terezinha Maria de Paiva                                                                                                                |
| 168 | EPI_ISL_414015 | hCoV-19/Brazil/SPBR-06/2020           | <i>Homo sapiens</i> | South America / Brazil / Sao Paulo / Sao Paulo | 2020-02-29 | Hospital São Joaquim Beneficencia Portuguesa                                                                    | Instituto Adolfo Lutz, Interdisciplinary Procedures Center, Strategic Laboratory | Claudio Tavares Sacchi, Claudia Regina Gonçalves, Simone Guadagnucci Morillo, Carlos Henrique Camargo, Maria do Carmo Sampaio Tavares Timenetsky, Fabiana Cristina Pereira dos Santos Terezinha Maria de Paiva, Ester Cerdeira Sabino                                                                                                                                                           |
| 168 | EPI_ISL_416658 | hCoV-19/USA/WA-UW120/2020             | <i>Homo sapiens</i> | North America / USA / Washington               | 2020-03-11 | UW Virology Lab                                                                                                 | UW Virology Lab                                                                  | Pavitra Roychoudhury, Hong Xie, Keith Jerome, Alexander Greninger                                                                                                                                                                                                                                                                                                                               |
| 168 | EPI_ISL_416742 | hCoV-19/Czech Republic/ChVir1630/2020 | <i>Homo sapiens</i> | Europe / Czech Republic / Prague               | 2020-02    | NRL for Influenza, Centrum Epidemiology and Microbiology of National Institute of Public Health, Czech Republic | Charite Universitaetsmedizin Berlin, Institute of Virology                       | Victor M Corman, Julia Schneider, Jörn Beheim-Schwarzbach, Talitha Veith, Barbara Muehleemann, Terry Jones, Akexander Nagy, Jaromira Vecerova, Dusan Trnka, Ludmila Novakova, Helena Jirincova, Christian Drosten                                                                                                                                                                               |
| 168 | EPI_ISL_416832 | hCoV-19/USA/NY-NYUMC4/2020            | <i>Homo sapiens</i> | North America / USA / New York City            | 2020-03-16 | NYU Langone Health                                                                                              | Department of Pathology and Medicine, New York University School of Medicine     | John Chen, Dacia Dimartino, Xiaojun Feng, Adriana Heguy, Megan Hogan, Emily Huang, George Jour, Christian Marier, Matt Maurano, Mark Mulligan, Peter Meyn, Marie Samanovic-Golden, Amy Rapkiewicz, Guomiao Shen, Matija Snuderl, Gael Westby, Paul Zappile                                                                                                                                      |
| 168 | EPI_ISL_417032 | hCoV-19/Australia/QLDID920/2020       | <i>Homo sapiens</i> | Oceania / Australia / Queensland / Rockhampton | 2020-03-11 | Rockhampton Base Hospital                                                                                       | Public Health Virology Laboratory                                                | Bixing Huang, Alyssa Pyke, Amanda De Jong, Andrew Van Den Hurk, Carmel Taylor, David Warrillow, Doris Genge, Elisabeth Gamez, Glen Hewitson, Ian Maxwell Mackay, Inga Sultana, Jamie McMahon, Jean Barcelon, Judy Northill, Mitchell Finger, Natalie Simpson, Neelima Nair, Peter Burtonclay, Peter Moore, Sarah Wheatley, Sean Moody, Sonja Hall-Mendelin, Timothy Gardam, and Frederick Moore |
| 169 | EPI_ISL_414016 | hCoV-19/Brazil/SPBR-05/2020           | <i>Homo sapiens</i> | South America / Brazil / Sao Paulo / Sao Paulo | 2020-02-29 | Hospital São Joaquim Beneficencia Portuguesa                                                                    | Instituto Adolfo Lutz, Interdisciplinary Procedures Center, Strategic Laboratory | Claudio Tavares Sacchi, Claudia Regina Gonçalves, Audrey Cilli, Carlos Henrique Camargo, Maria do Carmo Sampaio Tavares Timenetsky, Daniela Bernardes Borges da Silva, Terezinha Maria de Paiva, Ester Cerdeira Sabino                                                                                                                                                                          |
| 169 | EPI_ISL_416031 | hCoV-19/Brazil/SPBR-09/2020           | <i>Homo sapiens</i> | South America / Brazil / Sao Paulo / Sao Paulo | 2020-03-04 | National Influenza Center - Instituto Adolfo Lutz                                                               | Instituto Adolfo Lutz, Interdisciplinary Procedures Center, Strategic Laboratory | Claudio Tavares Sacchi, Claudia Regina Gonçalves, Carlos Henrique Camargo, Fabiana Cristina Pereira dos Santos, Daniela Bernardes Borges da Silva, Simone Guadagnucci Morillo, Adriano Abbud, Adriana Bugno, Maria do Carmo Sampaio Tavares Timenetsky, Terezinha Maria de Paiva                                                                                                                |
| 170 | EPI_ISL_414019 | hCoV-19/Switzerland/GE3121/2020       | <i>Homo sapiens</i> | Europe / Switzerland / Geneva                  | 2020-02-27 | Laboratoire de Virologie, HUG                                                                                   | Swiss National Reference Centre for Influenza                                    | LAUBSCHER Florian et al.                                                                                                                                                                                                                                                                                                                                                                        |
| 170 | EPI_ISL_414020 | hCoV-19/Switzerland/GE5373/2020       | <i>Homo sapiens</i> | Europe / Switzerland / Geneva                  | 2020-02-27 | Laboratoire de Virologie, HUG                                                                                   | Swiss National Reference Centre for Influenza                                    | LAUBSCHER Florian et al.                                                                                                                                                                                                                                                                                                                                                                        |
| 171 | EPI_ISL_414023 | hCoV-19/Switzerland/VD5615/2020       | <i>Homo sapiens</i> | Europe / Switzerland / Vaud                    | 2020-03-01 | Laboratoire de Virologie, HUG                                                                                   | Swiss National Reference Centre for Influenza                                    | LAUBSCHER Florian et al.                                                                                                                                                                                                                                                                                                                                                                        |



|     |                |                                         |                     |                                               |            |                                                            |                                                            |                                                                                                                                                                                                                                                                                                                                                                                                                                   |
|-----|----------------|-----------------------------------------|---------------------|-----------------------------------------------|------------|------------------------------------------------------------|------------------------------------------------------------|-----------------------------------------------------------------------------------------------------------------------------------------------------------------------------------------------------------------------------------------------------------------------------------------------------------------------------------------------------------------------------------------------------------------------------------|
| 171 | EPI_ISL_415459 | hCoV-19/Switzerland/VD0503/2020         | <i>Homo sapiens</i> | Europe / Switzerland / Genève                 | 2020-02-29 | Hôpitaux universitaires de Genève Laboratoire de Virologie | Hôpitaux universitaires de Genève Laboratoire de Virologie | Laubscher F.                                                                                                                                                                                                                                                                                                                                                                                                                      |
| 172 | EPI_ISL_414027 | hCoV-19/Scotland/CVR05/2020             | <i>Homo sapiens</i> | Europe / United Kingdom / Scotland            | 2020-03-04 | West of Scotland Specialist Virology Centre, NHS GGC       | MRC-University of Glasgow Centre for Virus Research        | Emma Thomson, Antonia Ho; Kathy Smollett, Daniel Mair, Stephen Carmichael, Ana da Silva Filipe; Richard Orton, David L Robertson; Alasdair MacLean, Rory Gunson.                                                                                                                                                                                                                                                                  |
| 173 | EPI_ISL_414363 | hCoV-19/USA/WA-UW15/2020                | <i>Homo sapiens</i> | North America / USA / Washington              | 2020-03-04 | UW Virology Lab                                            | UW Virology Lab                                            | Pavitra Roychoudhury, Hong Xie, Keith Jerome, Alexander Greninger                                                                                                                                                                                                                                                                                                                                                                 |
| 174 | EPI_ISL_414368 | hCoV-19/USA/WA-UW20/2020                | <i>Homo sapiens</i> | North America / USA / Washington              | 2020-03-05 | UW Virology Lab                                            | UW Virology Lab                                            | Pavitra Roychoudhury, Hong Xie, Keith Jerome, Alexander Greninger                                                                                                                                                                                                                                                                                                                                                                 |
| 175 | EPI_ISL_414414 | hCoV-19/Australia/QLD09/2020            | <i>Homo sapiens</i> | Oceania / Australia / Queensland / Gold Coast | 2020-02-29 | Pathology Queensland                                       | Public Health Virology Laboratory                          | Bixing Huang, Alyssa Pyke, Amanda De Jong, Andrew Van Den Hurk, Carmel Taylor, David Warrillow, Doris Genge, Elisabeth Gamez, Glen Hewitson, Ian Maxwell Mackay, Inga Sultana, Jamie McMahon, Jean Barcelon, Judy Northill, Mitchell Finger, Natalie Simpson, Neelima Nair, Peter Burtonclay, Peter Moore, Sarah Wheatley, Sean Moody, Sonja Hall-Mendelin, Timothy Gardam, and Frederick Moore                                   |
| 176 | EPI_ISL_414428 | hCoV-19/Netherlands/NoordBrabant_1/2020 | <i>Homo sapiens</i> | Europe / Netherlands / Noord Brabant          | 2020-03-02 | Dutch COVID-19 response team                               | Erasmus Medical Center                                     | David Nieuwenhuijse, Bas Oude Munnink, Reina Sikkema, Claudia Schapendonk, Irina Chestakova, Anne van der Linden, Mark Pronk, Pascal Lexmond, Corien Swaan, Manon Haverkate, Madelief Mollers, Mart Stein, Sandra Kengne Kanga Mobou, Jeroen van Kampen, Jolanda Voermans, Aura Timen, Corine GeurtsvanKessel, Annemiek van der Eijk, Richard Molenkamp, Marion Koopmans, on behalf of the Dutch national COVID-19 response team. |
| 177 | EPI_ISL_414429 | hCoV-19/Netherlands/NoordBrabant_3/2020 | <i>Homo sapiens</i> | Europe / Netherlands / Noord Brabant          | 2020-03-02 | Dutch COVID-19 response team                               | Erasmus Medical Center                                     | David Nieuwenhuijse, Bas Oude Munnink, Reina Sikkema, Claudia Schapendonk, Irina Chestakova, Anne van der Linden, Mark Pronk, Pascal Lexmond, Corien Swaan, Manon Haverkate, Madelief Mollers, Mart Stein, Sandra Kengne Kanga Mobou, Jeroen van Kampen, Jolanda Voermans, Aura Timen, Corine GeurtsvanKessel, Annemiek van der Eijk, Richard Molenkamp, Marion Koopmans, on behalf of the Dutch national COVID-19 response team. |
| 177 | EPI_ISL_415498 | hCoV-19/Netherlands/NA_9/2020           | <i>Homo sapiens</i> | Europe / Netherlands                          | 2020-03-09 | Dutch COVID-19 response team                               | Erasmus Medical Center                                     | David Nieuwenhuijse, Bas Oude Munnink, Reina Sikkema, Claudia Schapendonk, Irina Chestakova, Anne van der Linden, Mark Pronk, Pascal Lexmond, Corien Swaan, Manon Haverkate, Madelief Mollers, Mart Stein, Sandra Kengne Kanga Mobou, Jeroen van Kampen, Jolanda Voermans, Aura Timen, Corine GeurtsvanKessel, Annemiek van der Eijk, Richard Molenkamp, Marion Koopmans, on behalf of the Dutch national COVID-19 response team. |
| 178 | EPI_ISL_414435 | hCoV-19/Netherlands/Utrecht_1/2020      | <i>Homo sapiens</i> | Europe / Netherlands / Utrecht                | 2020-03-03 | Dutch COVID-19 response team                               | Erasmus Medical Center                                     | David Nieuwenhuijse, Bas Oude Munnink, Reina Sikkema, Claudia Schapendonk, Irina Chestakova, Anne van der Linden, Mark Pronk, Pascal Lexmond, Corien Swaan, Manon Haverkate, Madelief Mollers, Mart Stein, Sandra Kengne Kanga Mobou, Jeroen van Kampen, Jolanda Voermans, Aura Timen, Corine GeurtsvanKessel, Annemiek van der Eijk, Richard Molenkamp, Marion Koopmans, on behalf of the Dutch national COVID-19 response team. |

|     |                |                                          |                     |                                      |            |                                         |                                                                                                                        |                                                                                                                                                                                                                                                                                                                                                                                                                                   |
|-----|----------------|------------------------------------------|---------------------|--------------------------------------|------------|-----------------------------------------|------------------------------------------------------------------------------------------------------------------------|-----------------------------------------------------------------------------------------------------------------------------------------------------------------------------------------------------------------------------------------------------------------------------------------------------------------------------------------------------------------------------------------------------------------------------------|
| 179 | EPI_ISL_414445 | hCoV-19/Netherlands/ZuidHolland_9/2020   | <i>Homo sapiens</i> | Europe / Netherlands / Zuid Holland  | 2020-03-03 | Dutch COVID-19 response team            | Erasmus Medical Center                                                                                                 | David Nieuwenhuijse, Bas Oude Munnink, Reina Sikkema, Claudia Schapendonk, Irina Chestakova, Anne van der Linden, Mark Pronk, Pascal Lexmond, Corien Swaan, Manon Haverkate, Madelief Mollers, Mart Stein, Sandra Kengne Kanga Mobou, Jeroen van Kampen, Jolanda Voermans, Aura Timen, Corine GeurtsvanKessel, Annemiek van der Eijk, Richard Molenkamp, Marion Koopmans, on behalf of the Dutch national COVID-19 response team. |
| 179 | EPI_ISL_415480 | hCoV-19/Netherlands/NA_23/2020           | <i>Homo sapiens</i> | Europe / Netherlands                 | 2020-03-09 | Dutch COVID-19 response team            | Erasmus Medical Center                                                                                                 | David Nieuwenhuijse, Bas Oude Munnink, Reina Sikkema, Claudia Schapendonk, Irina Chestakova, Anne van der Linden, Mark Pronk, Pascal Lexmond, Corien Swaan, Manon Haverkate, Madelief Mollers, Mart Stein, Sandra Kengne Kanga Mobou, Jeroen van Kampen, Jolanda Voermans, Aura Timen, Corine GeurtsvanKessel, Annemiek van der Eijk, Richard Molenkamp, Marion Koopmans, on behalf of the Dutch national COVID-19 response team. |
| 180 | EPI_ISL_414451 | hCoV-19/Netherlands/NoordBrabant_6/2020  | <i>Homo sapiens</i> | Europe / Netherlands / Noord Brabant | 2020-03-06 | Dutch COVID-19 response team            | Erasmus Medical Center                                                                                                 | David Nieuwenhuijse, Bas Oude Munnink, Reina Sikkema, Claudia Schapendonk, Irina Chestakova, Anne van der Linden, Mark Pronk, Pascal Lexmond, Corien Swaan, Manon Haverkate, Madelief Mollers, Mart Stein, Sandra Kengne Kanga Mobou, Jeroen van Kampen, Jolanda Voermans, Aura Timen, Corine GeurtsvanKessel, Annemiek van der Eijk, Richard Molenkamp, Marion Koopmans, on behalf of the Dutch national COVID-19 response team. |
| 181 | EPI_ISL_414457 | hCoV-19/Netherlands/NoordBrabant_17/2020 | <i>Homo sapiens</i> | Europe / Netherlands / Noord Brabant | 2020-03-06 | Dutch COVID-19 response team            | Erasmus Medical Center                                                                                                 | David Nieuwenhuijse, Bas Oude Munnink, Reina Sikkema, Claudia Schapendonk, Irina Chestakova, Anne van der Linden, Mark Pronk, Pascal Lexmond, Corien Swaan, Manon Haverkate, Madelief Mollers, Mart Stein, Sandra Kengne Kanga Mobou, Jeroen van Kampen, Jolanda Voermans, Aura Timen, Corine GeurtsvanKessel, Annemiek van der Eijk, Richard Molenkamp, Marion Koopmans, on behalf of the Dutch national COVID-19 response team. |
| 182 | EPI_ISL_414468 | hCoV-19/Netherlands/ZuidHolland_8/2020   | <i>Homo sapiens</i> | Europe / Netherlands / Zuid Holland  | 2020-03-06 | Dutch COVID-19 response team            | Erasmus Medical Center                                                                                                 | David Nieuwenhuijse, Bas Oude Munnink, Reina Sikkema, Claudia Schapendonk, Irina Chestakova, Anne van der Linden, Mark Pronk, Pascal Lexmond, Corien Swaan, Manon Haverkate, Madelief Mollers, Mart Stein, Sandra Kengne Kanga Mobou, Jeroen van Kampen, Jolanda Voermans, Aura Timen, Corine GeurtsvanKessel, Annemiek van der Eijk, Richard Molenkamp, Marion Koopmans, on behalf of the Dutch national COVID-19 response team. |
| 183 | EPI_ISL_414470 | hCoV-19/Netherlands/ZuidHolland_13/2020  | <i>Homo sapiens</i> | Europe / Netherlands / Zuid Holland  | 2020-03-06 | Dutch COVID-19 response team            | Erasmus Medical Center                                                                                                 | David Nieuwenhuijse, Bas Oude Munnink, Reina Sikkema, Claudia Schapendonk, Irina Chestakova, Anne van der Linden, Mark Pronk, Pascal Lexmond, Corien Swaan, Manon Haverkate, Madelief Mollers, Mart Stein, Sandra Kengne Kanga Mobou, Jeroen van Kampen, Jolanda Voermans, Aura Timen, Corine GeurtsvanKessel, Annemiek van der Eijk, Richard Molenkamp, Marion Koopmans, on behalf of the Dutch national COVID-19 response team. |
| 184 | EPI_ISL_414482 | hCoV-19/USA/CruiseA-23/2020              | <i>Homo sapiens</i> | North America / USA                  | 2020-02-18 | unknown                                 | Pathogen Discovery, Respiratory Viruses Branch, Division of Viral Diseases, Centers for Disease Control and Prevention | Krista Queen, Anna Uehara, Ying Tao, Clinton R. Paden, Jing Zhang, Yan Li, Haibin Wang, Shifaa Kamili, Xiaoyan Lu, Brian Lynch, Senthil Kumar K. Saktivel, Brett L. Whitaker, Lijuan Wang, Janna' R. Murray, Jasmine Padilla, Justin Lee, Susan I. Gerber, Stephen Lindstrom, Suxiang Tong                                                                                                                                        |
| 185 | EPI_ISL_414487 | hCoV-19/Ireland/COR-20134/2020           | <i>Homo sapiens</i> | Europe / Ireland / Cork              | 2020-03-04 | UCD National Virus Reference Laboratory | UCD National Virus Reference Laboratory                                                                                | Michael Carr, Gabriel Gonzalez, Jonathan Dean, Suzie Coughlan, Alison Murphy, Kevin Byrne, Ken Wolfe, Jeff Connell, Brendan Loftus, Cillian F De Gascun                                                                                                                                                                                                                                                                           |

|     |                |                                          |                     |                                                                |            |                                                                                           |                                                                                           |                                                                                                                                                                                                                                                                                                                                                                                                                                   |
|-----|----------------|------------------------------------------|---------------------|----------------------------------------------------------------|------------|-------------------------------------------------------------------------------------------|-------------------------------------------------------------------------------------------|-----------------------------------------------------------------------------------------------------------------------------------------------------------------------------------------------------------------------------------------------------------------------------------------------------------------------------------------------------------------------------------------------------------------------------------|
| 186 | EPI_ISL_414509 | hCoV-19/Germany/NRW-09/2020              | <i>Homo sapiens</i> | Europe / Germany / North Rhine Westphalia / Heinsberg District | 2020-02-28 | Center of Medical Microbiology, Virology, and Hospital Hygiene, University of Duesseldorf | Center of Medical Microbiology, Virology, and Hospital Hygiene, University of Duesseldorf | Ortwin Adams, Marcel Andree, Alexander Dilthey, Torsten Feldt, Sandra Hauka, Torsten Houwaart, Björn-Erik Jensen, Detlef Kindgen-Milles, Malte Kohns Vasconcelos, Klaus Pfeffer, Tina Senff, Daniel Strelow, Jörg Timm, Andreas Walker, Tobias Wienemann                                                                                                                                                                          |
| 187 | EPI_ISL_414510 | hCoV-19/Shanghai/SH01/2020               | <i>Homo sapiens</i> | Asia / China / Shanghai                                        | 2020-02-02 | unknown                                                                                   | Key Laboratory of Medical Molecular Virology (MOE/NHC/CAMS)                               | Zhang,R., Yi,Z., Wang,Y., Teng,Z., Xu,W., Song,W., Cai,X., Sun,Z., Gu,C., Zhou,Y., Chen,H., Ye,R., Han,W., Zhu,Y., Feng,F., Fang,F., Li,C., Zhang,X., Qu,D., Fu,C., Xie,Y. and Yuan,Z.                                                                                                                                                                                                                                            |
| 188 | EPI_ISL_414511 | hCoV-19/Japan/TKYE6182/2020              | <i>Homo sapiens</i> | Asia / Japan                                                   | 2020-01    | unknown                                                                                   | Ryota Kumagai Tokyo Metropolitan Institute of Public Health                               | Kumagai,R., Yoshida,I., Nagashima,M., Chiba,T. and Sadamasu,K.                                                                                                                                                                                                                                                                                                                                                                    |
| 189 | EPI_ISL_414520 | hCoV-19/Germany/BavPat2/2020             | <i>Homo sapiens</i> | Europe / Germany / Munich                                      | 2020-03-02 | Bundeswehr Institute of Microbiology                                                      | Bundeswehr Institute of Microbiology                                                      | Mathias C Walter, Markus H Antwerpen and Roman Wölfel                                                                                                                                                                                                                                                                                                                                                                             |
| 190 | EPI_ISL_414521 | hCoV-19/Germany/BavPat3/2020             | <i>Homo sapiens</i> | Europe / Germany / Munich                                      | 2020-03-02 | Bundeswehr Institute of Microbiology                                                      | Bundeswehr Institute of Microbiology                                                      | Mathias C Walter, Markus H Antwerpen and Roman Wölfel                                                                                                                                                                                                                                                                                                                                                                             |
| 191 | EPI_ISL_414523 | hCoV-19/England/200990660/2020           | <i>Homo sapiens</i> | Europe / United Kingdom / England                              | 2020-02-27 | Respiratory Virus Unit, Microbiology Services Colindale, Public Health England            | Respiratory Virus Unit, Microbiology Services Colindale, Public Health England            | Monica Galiano, Shahjahan Miah, Angie Lackenby, Omolola Akinbami, Tiina Talts, Leena Bhaw, Richard Myers, Steven Platt, Kirstin Edwards, Jonathan Hubb, Joanna Ellis, Maria Zambon                                                                                                                                                                                                                                                |
| 191 | EPI_ISL_414526 | hCoV-19/England/201040141/2020           | <i>Homo sapiens</i> | Europe / United Kingdom / England                              | 2020-03-03 | Respiratory Virus Unit, Microbiology Services Colindale, Public Health England            | Respiratory Virus Unit, Microbiology Services Colindale, Public Health England            | Monica Galiano, Shahjahan Miah, Angie Lackenby, Omolola Akinbami, Tiina Talts, Leena Bhaw, Richard Myers, Steven Platt, Kirstin Edwards, Jonathan Hubb, Joanna Ellis, Maria Zambon                                                                                                                                                                                                                                                |
| 192 | EPI_ISL_414525 | hCoV-19/England/201040081/2020           | <i>Homo sapiens</i> | Europe / United Kingdom / England                              | 2020-03-02 | Respiratory Virus Unit, Microbiology Services Colindale, Public Health England            | Respiratory Virus Unit, Microbiology Services Colindale, Public Health England            | Monica Galiano, Shahjahan Miah, Angie Lackenby, Omolola Akinbami, Tiina Talts, Leena Bhaw, Richard Myers, Steven Platt, Kirstin Edwards, Jonathan Hubb, Joanna Ellis, Maria Zambon                                                                                                                                                                                                                                                |
| 193 | EPI_ISL_414545 | hCoV-19/Netherlands/NoordBrabant_36/2020 | <i>Homo sapiens</i> | Europe / Netherlands / Noord Brabant                           | 2020-03-03 | Dutch COVID-19 response team                                                              | Erasmus Medical Center                                                                    | David Nieuwenhuijse, Bas Oude Munnink, Reina Sikkema, Claudia Schapendonk, Irina Chestakova, Anne van der Linden, Mark Pronk, Pascal Lexmond, Corien Swaan, Manon Haverkate, Madelief Mollers, Mart Stein, Sandra Kengne Kamga Mobou, Jeroen van Kampen, Jolanda Voermans, Aura Timen, Corine GeurtsvanKessel, Annemiek van der Eijk, Richard Molenkamp, Marion Koopmans, on behalf of the Dutch national COVID-19 response team. |
| 193 | EPI_ISL_414557 | hCoV-19/Netherlands/ZuidHolland_15/2020  | <i>Homo sapiens</i> | Europe / Netherlands / Zuid Holland                            | 2020-03-08 | Dutch COVID-19 response team                                                              | Erasmus Medical Center                                                                    | David Nieuwenhuijse, Bas Oude Munnink, Reina Sikkema, Claudia Schapendonk, Irina Chestakova, Anne van der Linden, Mark Pronk, Pascal Lexmond, Corien Swaan, Manon Haverkate, Madelief Mollers, Mart Stein, Sandra Kengne Kamga Mobou, Jeroen van Kampen, Jolanda Voermans, Aura Timen, Corine GeurtsvanKessel, Annemiek van der Eijk, Richard Molenkamp, Marion Koopmans, on behalf of the Dutch national COVID-19 response team. |
| 193 | EPI_ISL_414561 | hCoV-19/Netherlands/ZuidHolland_19/2020  | <i>Homo sapiens</i> | Europe / Netherlands / Zuid Holland                            | 2020-03-05 | Dutch COVID-19 response team                                                              | Erasmus Medical Center                                                                    | David Nieuwenhuijse, Bas Oude Munnink, Reina Sikkema, Claudia Schapendonk, Irina Chestakova, Anne van der Linden, Mark Pronk, Pascal Lexmond, Corien Swaan, Manon Haverkate, Madelief Mollers, Mart Stein, Sandra Kengne Kamga Mobou, Jeroen van Kampen, Jolanda Voermans, Aura Timen, Corine GeurtsvanKessel, Annemiek van der Eijk, Richard Molenkamp, Marion Koopmans, on behalf of the Dutch national COVID-19 response team. |

|     |                |                                    |       |                     |                                      |            |                              |                        |                                                                                                                                                                                                                                                                                                                                                                                                                                  |
|-----|----------------|------------------------------------|-------|---------------------|--------------------------------------|------------|------------------------------|------------------------|----------------------------------------------------------------------------------------------------------------------------------------------------------------------------------------------------------------------------------------------------------------------------------------------------------------------------------------------------------------------------------------------------------------------------------|
| 194 | EPI_ISL_414549 | 19/Netherlands/NoordHolland_2/2020 | hCoV- | <i>Homo sapiens</i> | Europe / Netherlands / Noord Holland | 2020-03-03 | Dutch COVID-19 response team | Erasmus Medical Center | David Nieuwenhuijse, Bas Oude Munnink, Reina Sikkema, Claudia Schapendonk, Irina Chestakova, Anne van der Linden, Mark Pronk, Pascal Lexmond, Corien Swaan, Manon Haverkate, Madelief Mollers, Mart Stein, Sandra Kengne Kanga Mobou, Jeroen van Kampen, Jolanda Voermans, Aura Timen, Corine GeurtsvanKessel, Anemiek van der Eijk, Richard Molenkamp, Marion Koopmans, on behalf of the Dutch national COVID-19 response team. |
| 195 | EPI_ISL_414552 | 19/Netherlands/Utrecht_13/2020     | hCoV- | <i>Homo sapiens</i> | Europe / Netherlands / Utrecht       | 2020-03-07 | Dutch COVID-19 response team | Erasmus Medical Center | David Nieuwenhuijse, Bas Oude Munnink, Reina Sikkema, Claudia Schapendonk, Irina Chestakova, Anne van der Linden, Mark Pronk, Pascal Lexmond, Corien Swaan, Manon Haverkate, Madelief Mollers, Mart Stein, Sandra Kengne Kanga Mobou, Jeroen van Kampen, Jolanda Voermans, Aura Timen, Corine GeurtsvanKessel, Anemiek van der Eijk, Richard Molenkamp, Marion Koopmans, on behalf of the Dutch national COVID-19 response team. |
| 195 | EPI_ISL_414564 | 19/Netherlands/ZuidHolland_22/2020 | hCoV- | <i>Homo sapiens</i> | Europe / Netherlands / Zuid Holland  | 2020-03-08 | Dutch COVID-19 response team | Erasmus Medical Center | David Nieuwenhuijse, Bas Oude Munnink, Reina Sikkema, Claudia Schapendonk, Irina Chestakova, Anne van der Linden, Mark Pronk, Pascal Lexmond, Corien Swaan, Manon Haverkate, Madelief Mollers, Mart Stein, Sandra Kengne Kanga Mobou, Jeroen van Kampen, Jolanda Voermans, Aura Timen, Corine GeurtsvanKessel, Anemiek van der Eijk, Richard Molenkamp, Marion Koopmans, on behalf of the Dutch national COVID-19 response team. |
| 196 | EPI_ISL_414554 | 19/Netherlands/Utrecht_15/2020     | hCoV- | <i>Homo sapiens</i> | Europe / Netherlands / Utrecht       | 2020-03-08 | Dutch COVID-19 response team | Erasmus Medical Center | David Nieuwenhuijse, Bas Oude Munnink, Reina Sikkema, Claudia Schapendonk, Irina Chestakova, Anne van der Linden, Mark Pronk, Pascal Lexmond, Corien Swaan, Manon Haverkate, Madelief Mollers, Mart Stein, Sandra Kengne Kanga Mobou, Jeroen van Kampen, Jolanda Voermans, Aura Timen, Corine GeurtsvanKessel, Anemiek van der Eijk, Richard Molenkamp, Marion Koopmans, on behalf of the Dutch national COVID-19 response team. |
| 197 | EPI_ISL_414555 | 19/Netherlands/Utrecht_16/2020     | hCoV- | <i>Homo sapiens</i> | Europe / Netherlands / Utrecht       | 2020-03-08 | Dutch COVID-19 response team | Erasmus Medical Center | David Nieuwenhuijse, Bas Oude Munnink, Reina Sikkema, Claudia Schapendonk, Irina Chestakova, Anne van der Linden, Mark Pronk, Pascal Lexmond, Corien Swaan, Manon Haverkate, Madelief Mollers, Mart Stein, Sandra Kengne Kanga Mobou, Jeroen van Kampen, Jolanda Voermans, Aura Timen, Corine GeurtsvanKessel, Anemiek van der Eijk, Richard Molenkamp, Marion Koopmans, on behalf of the Dutch national COVID-19 response team. |
| 198 | EPI_ISL_414558 | 19/Netherlands/ZuidHolland_16/2020 | hCoV- | <i>Homo sapiens</i> | Europe / Netherlands / Zuid Holland  | 2020-03-06 | Dutch COVID-19 response team | Erasmus Medical Center | David Nieuwenhuijse, Bas Oude Munnink, Reina Sikkema, Claudia Schapendonk, Irina Chestakova, Anne van der Linden, Mark Pronk, Pascal Lexmond, Corien Swaan, Manon Haverkate, Madelief Mollers, Mart Stein, Sandra Kengne Kanga Mobou, Jeroen van Kampen, Jolanda Voermans, Aura Timen, Corine GeurtsvanKessel, Anemiek van der Eijk, Richard Molenkamp, Marion Koopmans, on behalf of the Dutch national COVID-19 response team. |
| 199 | EPI_ISL_414559 | 19/Netherlands/ZuidHolland_17/2020 | hCoV- | <i>Homo sapiens</i> | Europe / Netherlands / Zuid Holland  | 2020-03-07 | Dutch COVID-19 response team | Erasmus Medical Center | David Nieuwenhuijse, Bas Oude Munnink, Reina Sikkema, Claudia Schapendonk, Irina Chestakova, Anne van der Linden, Mark Pronk, Pascal Lexmond, Corien Swaan, Manon Haverkate, Madelief Mollers, Mart Stein, Sandra Kengne Kanga Mobou, Jeroen van Kampen, Jolanda Voermans, Aura Timen, Corine GeurtsvanKessel, Anemiek van der Eijk, Richard Molenkamp, Marion Koopmans, on behalf of the Dutch national COVID-19 response team. |

|     |                |                                         |                     |                                             |            |                                                                                                      |                                                                                          |                                                                                                                                                                                                                                                                                                                                                                                                                                  |
|-----|----------------|-----------------------------------------|---------------------|---------------------------------------------|------------|------------------------------------------------------------------------------------------------------|------------------------------------------------------------------------------------------|----------------------------------------------------------------------------------------------------------------------------------------------------------------------------------------------------------------------------------------------------------------------------------------------------------------------------------------------------------------------------------------------------------------------------------|
| 200 | EPI_ISL_414562 | hCoV-19/Netherlands/ZuidHolland_20/2020 | <i>Homo sapiens</i> | Europe / Netherlands / Zuid Holland         | 2020-03-03 | Dutch COVID-19 response team                                                                         | Erasmus Medical Center                                                                   | David Nieuwenhuijse, Bas Oude Munnink, Reina Sikkema, Claudia Schapendonk, Irina Chestakova, Anne van der Linden, Mark Pronk, Pascal Lexmond, Corien Swaan, Manon Haverkate, Madelief Mollers, Mart Stein, Sandra Kengne Kamga Mobou, Jeroen van Kampen, Jolanda Voermans, Aura Timen, Corine GeurtsvanKessel, Anemiek van der Eijk, Richard Molenkamp, Marion Koopmans, on behalf of the Dutch national COVID-19 response team. |
| 201 | EPI_ISL_414577 | hCoV-19/Chile/Talca-1/2020              | <i>Homo sapiens</i> | South America / Chile / Talca               | 2020-03-02 | Hospital de Talca, Chile                                                                             | Instituto de Salud Publica de Chile                                                      | Andrés E. Castillo, Bárbara Parra, Paz Tapia, Alejandra Acevedo, Jaime Lagos, Winston Andrade, Loredana Arata, Gabriel Leal, Gisselle Barra, Carolina Tambley, Javier Tognarelli, Patricia Bustos, Soledad Ulloa, Rodrigo Fasce, Jorge Fernández.                                                                                                                                                                                |
| 202 | EPI_ISL_414579 | hCoV-19/Chile/Santiago-1/2020           | <i>Homo sapiens</i> | South America / Chile / Santiago            | 2020-03-03 | Clinica Alemana de Santiago, Chile                                                                   | Instituto de Salud Publica de Chile                                                      | Andrés E. Castillo, Bárbara Parra, Paz Tapia, Alejandra Acevedo, Jaime Lagos, Winston Andrade, Loredana Arata, Gabriel Leal, Gisselle Barra, Carolina Tambley, Javier Tognarelli, Patricia Bustos, Soledad Ulloa, Rodrigo Fasce, Jorge Fernández.                                                                                                                                                                                |
| 203 | EPI_ISL_414580 | hCoV-19/Chile/Santiago-2/2020           | <i>Homo sapiens</i> | South America / Chile / Santiago            | 2020-03-05 | Clinica Santa Maria, Santiago, Chile                                                                 | Instituto de Salud Publica de Chile                                                      | Andrés E. Castillo, Bárbara Parra, Paz Tapia, Alejandra Acevedo, Jaime Lagos, Winston Andrade, Loredana Arata, Gabriel Leal, Gisselle Barra, Carolina Tambley, Javier Tognarelli, Patricia Bustos, Soledad Ulloa, Rodrigo Fasce, Jorge Fernández.                                                                                                                                                                                |
| 204 | EPI_ISL_414589 | hCoV-19/USA/MN2-MDH2/2020               | <i>Homo sapiens</i> | North America / USA / Minnesota             | 2020-03-07 | Minnesota Department of Health, Public Health Laboratory                                             | Minnesota Department of Health, Public Health Laboratory                                 | Matt Plumb, Jake Garfin and Xiong Wang                                                                                                                                                                                                                                                                                                                                                                                           |
| 205 | EPI_ISL_414590 | hCoV-19/USA/MN3-MDH3/2020               | <i>Homo sapiens</i> | North America / USA / Minnesota             | 2020-03-09 | Minnesota Department of Health, Public Health Laboratory                                             | Minnesota Department of Health, Public Health Laboratory                                 | Matt Plumb, Jake Garfin and Xiong Wang                                                                                                                                                                                                                                                                                                                                                                                           |
| 206 | EPI_ISL_414591 | hCoV-19/USA/WA-UW22/2020                | <i>Homo sapiens</i> | North America / USA / Washington / Kirkland | 2020-03-06 | UW Virology Lab                                                                                      | UW Virology Lab                                                                          | Pavitra Roychoudhury, Hong Xie, Keith Jerome, Alexander Greninger                                                                                                                                                                                                                                                                                                                                                                |
| 207 | EPI_ISL_414592 | hCoV-19/USA/WA-UW23/2020                | <i>Homo sapiens</i> | North America / USA / Washington / Tacoma   | 2020-03-06 | UW Virology Lab                                                                                      | UW Virology Lab                                                                          | Pavitra Roychoudhury, Hong Xie, Keith Jerome, Alexander Greninger                                                                                                                                                                                                                                                                                                                                                                |
| 208 | EPI_ISL_414595 | hCoV-19/USA/WA-UW26/2020                | <i>Homo sapiens</i> | North America / USA / Washington / Kirkland | 2020-03-05 | UW Virology Lab                                                                                      | UW Virology Lab                                                                          | Pavitra Roychoudhury, Hong Xie, Keith Jerome, Alexander Greninger                                                                                                                                                                                                                                                                                                                                                                |
| 209 | EPI_ISL_414600 | hCoV-19/France/GE1583/2020              | <i>Homo sapiens</i> | Europe / France / Grand-Est / Strasbourg    | 2020-02-26 | Laboratoire de Virologie Institut de Virologie - INSERM U 1109 Hôpitaux Universitaires de Strasbourg | National Reference Center for Viruses of Respiratory Infections, Institut Pasteur, Paris | Mélnie Albert, Marion Barbet, Sylvie Behillil, Méline Bizard, Angela Brisebarre, Flora Donati Vincent Enouf, Maud Vanpeene, Sylvie van der Werf, Samira Fafi-Kremer                                                                                                                                                                                                                                                              |
| 210 | EPI_ISL_414601 | hCoV-19/France/N1620/2020               | <i>Homo sapiens</i> | Europe / France / Normandie / Rouen         | 2020-02-27 | "Centre Hospitalier Universitaire de Rouen Laboratoire de Virologie"                                 | National Reference Center for Viruses of Respiratory Infections, Institut Pasteur, Paris | Mélnie Albert, Marion Barbet, Sylvie Behillil, Méline Bizard, Angela Brisebarre, Flora Donati Vincent Enouf, Maud Vanpeene, Sylvie van der Werf, Jean-Christophe Plantier                                                                                                                                                                                                                                                        |
| 211 | EPI_ISL_414618 | hCoV-19/USA/WA-UW31/2020                | <i>Homo sapiens</i> | North America / USA                         | 2020-03-08 | UW Virology Lab                                                                                      | UW Virology Lab                                                                          | Pavitra Roychoudhury, Hong Xie, Keith Jerome, Alexander Greninger                                                                                                                                                                                                                                                                                                                                                                |
| 212 | EPI_ISL_414623 | hCoV-19/France/GE1583/2020              | <i>Homo sapiens</i> | Europe / France / Grand-Est / Strasbourg    | 2020-02-25 | Laboratoire de Virologie Institut de Virologie - INSERM U 1109 Hôpitaux Universitaires de Strasbourg | National Reference Center for Viruses of Respiratory Infections, Institut Pasteur, Paris | Mélnie Albert, Marion Barbet, Sylvie Behillil, Méline Bizard, Angela Brisebarre, Flora Donati Vincent Enouf, Maud Vanpeene, Sylvie van der Werf, Samira Fafi-Kremer                                                                                                                                                                                                                                                              |
| 213 | EPI_ISL_414624 | hCoV-19/France/N1620/2020               | <i>Homo sapiens</i> | Europe / France / Normandie / Rouen         | 2020-02-26 | Centre Hospitalier Universitaire de Rouen Laboratoire de Virologie                                   | National Reference Center for Viruses of Respiratory Infections, Institut Pasteur, Paris | Mélnie Albert, Marion Barbet, Sylvie Behillil, Méline Bizard, Angela Brisebarre, Flora Donati Vincent Enouf, Maud Vanpeene, Sylvie van der Werf, Jean-Christophe Plantier                                                                                                                                                                                                                                                        |

|     |                |                              |                     |                                                     |            |                                                                                                                |                                                                                          |                                                                                                                                                                       |
|-----|----------------|------------------------------|---------------------|-----------------------------------------------------|------------|----------------------------------------------------------------------------------------------------------------|------------------------------------------------------------------------------------------|-----------------------------------------------------------------------------------------------------------------------------------------------------------------------|
| 214 | EPI_ISL_414625 | hCoV-19/France/PL1643/2020   | <i>Homo sapiens</i> | Europe / France / Pays de la Loire / Nantes         | 2020-02-26 | Centre Hospitalier Régional Universitaire de Nantes<br>Laboratoire de Virologie                                | National Reference Center for Viruses of Respiratory Infections, Institut Pasteur, Paris | Mélnie Albert, Marion Barbet, Sylvie Behillil, Méline Bizard, Angela Brisebarre, Flora Donati Vincent Enouf, Maud Vanpeene, Sylvie van der Werf, Marianne Coste-Burel |
| 215 | EPI_ISL_414626 | hCoV-19/France/HF1684/2020   | <i>Homo sapiens</i> | Europe / France / Hauts de France / Crépy en Valois | 2020-02-29 | unknown                                                                                                        | National Reference Center for Viruses of Respiratory Infections, Institut Pasteur, Paris | Mélnie Albert, Marion Barbet, Sylvie Behillil, Méline Bizard, Angela Brisebarre, Flora Donati Vincent Enouf, Maud Vanpeene, Sylvie van der Werf                       |
| 216 | EPI_ISL_414627 | hCoV-19/France/HF1795/2020   | <i>Homo sapiens</i> | Europe / France / Hauts de France / Compiègne       | 2020-03-02 | Centre Hospitalier Compiègne<br>Laboratoire de Biologie                                                        | National Reference Center for Viruses of Respiratory Infections, Institut Pasteur, Paris | Mélnie Albert, Marion Barbet, Sylvie Behillil, Méline Bizard, Angela Brisebarre, Flora Donati Vincent Enouf, Maud Vanpeene, Sylvie van der Werf, Raulin Olivia        |
| 217 | EPI_ISL_414629 | hCoV-19/France/HF1870/2020   | <i>Homo sapiens</i> | Europe / France / Hauts de France / Compiègne       | 2020-03-03 | Centre Hospitalier Compiègne<br>Laboratoire de Biologie                                                        | National Reference Center for Viruses of Respiratory Infections, Institut Pasteur, Paris | Mélnie Albert, Marion Barbet, Sylvie Behillil, Méline Bizard, Angela Brisebarre, Flora Donati Vincent Enouf, Maud Vanpeene, Sylvie van der Werf, Raulin Olivia        |
| 218 | EPI_ISL_414630 | hCoV-19/France/HF1871/2020   | <i>Homo sapiens</i> | Europe / France / Hauts de France / Compiègne       | 2020-03-03 | Centre Hospitalier Compiègne<br>Laboratoire de Biologie                                                        | National Reference Center for Viruses of Respiratory Infections, Institut Pasteur, Paris | Mélnie Albert, Marion Barbet, Sylvie Behillil, Méline Bizard, Angela Brisebarre, Flora Donati Vincent Enouf, Maud Vanpeene, Sylvie van der Werf, Raulin Olivia        |
| 219 | EPI_ISL_414631 | hCoV-19/France/GE1973/2020   | <i>Homo sapiens</i> | Europe / France / Grand-Est / Reims                 | 2020-03-04 | Hôpital Robert Debré<br>Laboratoire de Virologie                                                               | National Reference Center for Viruses of Respiratory Infections, Institut Pasteur, Paris | Mélnie Albert, Marion Barbet, Sylvie Behillil, Méline Bizard, Angela Brisebarre, Flora Donati Vincent Enouf, Maud Vanpeene, Sylvie van der Werf, Laurent Andreoletti  |
| 220 | EPI_ISL_414632 | hCoV-19/France/GE1977/2020   | <i>Homo sapiens</i> | Europe / France / Grand-Est / Reims                 | 2020-03-04 | Hôpital Robert Debré<br>Laboratoire de Virologie                                                               | National Reference Center for Viruses of Respiratory Infections, Institut Pasteur, Paris | Mélnie Albert, Marion Barbet, Sylvie Behillil, Méline Bizard, Angela Brisebarre, Flora Donati Vincent Enouf, Maud Vanpeene, Sylvie van der Werf, Laurent Andreoletti  |
| 221 | EPI_ISL_414633 | hCoV-19/France/IDF1980/2020  | <i>Homo sapiens</i> | Europe / France / Ile-de-France / Pontoise          | 2020-03-04 | Centre Hospitalier René Dubois<br>Laboratoire de Microbiologie - Bât A                                         | National Reference Center for Viruses of Respiratory Infections, Institut Pasteur, Paris | Mélnie Albert, Marion Barbet, Sylvie Behillil, Méline Bizard, Angela Brisebarre, Flora Donati Vincent Enouf, Maud Vanpeene, Sylvie van der Werf, Pascale Martres      |
| 222 | EPI_ISL_414635 | hCoV-19/France/HF1988/2020   | <i>Homo sapiens</i> | Europe / France / Hauts de France / Compiègne       | 2020-03-04 | Centre Hospitalier Compiègne<br>Laboratoire de Biologie                                                        | National Reference Center for Viruses of Respiratory Infections, Institut Pasteur, Paris | Mélnie Albert, Marion Barbet, Sylvie Behillil, Méline Bizard, Angela Brisebarre, Flora Donati Vincent Enouf, Maud Vanpeene, Sylvie van der Werf, Raulin Olivia        |
| 223 | EPI_ISL_414637 | hCoV-19/France/HF1993/2020   | <i>Homo sapiens</i> | Europe / France / Hauts de France / Compiègne       | 2020-03-04 | Centre Hospitalier Compiègne<br>Laboratoire de Biologie                                                        | National Reference Center for Viruses of Respiratory Infections, Institut Pasteur, Paris | Mélnie Albert, Marion Barbet, Sylvie Behillil, Méline Bizard, Angela Brisebarre, Flora Donati Vincent Enouf, Maud Vanpeene, Sylvie van der Werf, Raulin Olivia        |
| 224 | EPI_ISL_414638 | hCoV-19/France/HF1995/2020   | <i>Homo sapiens</i> | Europe / France / Hauts de France / Compiègne       | 2020-03-04 | Centre Hospitalier Compiègne<br>Laboratoire de Biologie                                                        | National Reference Center for Viruses of Respiratory Infections, Institut Pasteur, Paris | Mélnie Albert, Marion Barbet, Sylvie Behillil, Méline Bizard, Angela Brisebarre, Flora Donati Vincent Enouf, Maud Vanpeene, Sylvie van der Werf, Raulin Olivia        |
| 225 | EPI_ISL_414641 | hCoV-19/Finland/FIN-313/2020 | <i>Homo sapiens</i> | Europe / Finland                                    | 2020-03-05 | Department of Virology and Immunology, University of Helsinki and Helsinki University Hospital, Huslab Finland | Department of Virology, Faculty of Medicine, University of Helsinki, Helsinki, Finland   | Teemu Smura, Hannimari Kallio-Kokko, Olli Vapalahti                                                                                                                   |
| 226 | EPI_ISL_414642 | hCoV-19/Finland/FIN-455/2020 | <i>Homo sapiens</i> | Europe / Finland                                    | 2020-03-08 | Department of Virology and Immunology, University of Helsinki and Helsinki University Hospital, Huslab Finland | Department of Virology, Faculty of Medicine, University of Helsinki, Helsinki, Finland   | Teemu Smura, Hannimari Kallio-Kokko, Olli Vapalahti                                                                                                                   |
| 227 | EPI_ISL_414643 | hCoV-19/Finland/FIN-508/2020 | <i>Homo sapiens</i> | Europe / Finland                                    | 2020-03-07 | Department of Virology and Immunology, University of Helsinki and Helsinki University Hospital, Huslab Finland | Department of Virology, Faculty of Medicine, University of Helsinki, Helsinki, Finland   | Teemu Smura, Hannimari Kallio-Kokko, Olli Vapalahti                                                                                                                   |
| 228 | EPI_ISL_414646 | hCoV-19/Finland/FIN-266/2020 | <i>Homo sapiens</i> | Europe / Finland                                    | 2020-03-04 | Department of Virology and Immunology, University of Helsinki and Helsinki University Hospital, Huslab Finland | Department of Virology, Faculty of Medicine, University of Helsinki, Helsinki, Finland   | Teemu Smura, Hannimari Kallio-Kokko, Olli Vapalahti                                                                                                                   |

|     |                |                                 |                     |                                                     |            |                                                                                                                                                                                                                  |                                                                              |                                                                                                                                                                                                                                                      |
|-----|----------------|---------------------------------|---------------------|-----------------------------------------------------|------------|------------------------------------------------------------------------------------------------------------------------------------------------------------------------------------------------------------------|------------------------------------------------------------------------------|------------------------------------------------------------------------------------------------------------------------------------------------------------------------------------------------------------------------------------------------------|
| 229 | EPI_ISL_414648 | hCoV-19/USA/CA-PC101P/2020      | <i>Homo sapiens</i> | North America / USA / California / San Diego County | 2020-03-11 | Andersen Lab, The Scripps Research Institute                                                                                                                                                                     | Andersen Lab, The Scripps Research Institute                                 | Mark Zeller, Catie Anderson, Emily Spender, Sarah Topol, Raphaelle Klitting, Refugio Robles-Sikisaka, Karthik Gangavarapu, Laura Nicholson, Kristian Andersen                                                                                        |
| 230 | EPI_ISL_414663 | hCoV-19/Guangzhou/GZMU0016/2020 | <i>Homo sapiens</i> | Asia / China / Guangdong / Guangzhou                | 2020-02-25 | State Key Laboratory of Respiratory Disease, National Clinical Research Center for Respiratory Disease, Guangzhou Institute of Respiratory Health, the First Affiliated Hospital of Guangzhou Medical University | the First Affiliated Hospital of Guangzhou Medical University & BGI-Shenzhen | Zhao et al                                                                                                                                                                                                                                           |
| 231 | EPI_ISL_414688 | hCoV-19/Guangzhou/GZMU0042/2020 | <i>Homo sapiens</i> | Asia / China / Guangdong / Guangzhou                | 2020-02-25 | State Key Laboratory of Respiratory Disease, National Clinical Research Center for Respiratory Disease, Guangzhou Institute of Respiratory Health, the First Affiliated Hospital of Guangzhou Medical University | The First Affiliated Hospital of Guangzhou Medical University & BGI-Shenzhen | Zhao et al                                                                                                                                                                                                                                           |
| 232 | EPI_ISL_414692 | hCoV-19/Guangzhou/GZMU0014/2020 | <i>Homo sapiens</i> | Asia / China / Guangdong / Guangzhou                | 2020-02-25 | State Key Laboratory of Respiratory Disease, National Clinical Research Center for Respiratory Disease, Guangzhou Institute of Respiratory Health, the First Affiliated Hospital of Guangzhou Medical University | The First Affiliated Hospital of Guangzhou Medical University & BGI-Shenzhen | Zhao et al                                                                                                                                                                                                                                           |
| 233 | EPI_ISL_414938 | hCoV-19/Shandong/LY005/2020     | <i>Homo sapiens</i> | Asia / China / Shandong                             | 2020-01-24 | Shandong Provincial Center for Disease Control and Prevention                                                                                                                                                    | Beijing Institute of Microbiology and Epidemiology                           | Xiao-Lin Jiang, Xiao-Li Zhang, Xiang-Na Zhao, Cun-Bao Li, Jie Lei, Zeng-Qiang Kou, Wen-Kui Sun, Yang Hang, Feng Gao, Sheng-Xiang Ji, Can-Fang Lin, Bo Pang, Ming-Xiao Yao, Guo-Lin Wang, Lin Yao, Li-Jun Duan, Xiao Wei, Dian-Ming Kang, Mai-Juan Ma |
| 234 | EPI_ISL_414940 | hCoV-19/Shandong/LY007/2020     | <i>Homo sapiens</i> | Asia / China / Shandong                             | 2020-01-25 | Shandong Provincial Center for Disease Control and Prevention                                                                                                                                                    | Beijing Institute of Microbiology and Epidemiology                           | Xiao-Lin Jiang, Xiao-Li Zhang, Xiang-Na Zhao, Cun-Bao Li, Jie Lei, Zeng-Qiang Kou, Wen-Kui Sun, Yang Hang, Feng Gao, Sheng-Xiang Ji, Can-Fang Lin, Bo Pang, Ming-Xiao Yao, Guo-Lin Wang, Lin Yao, Li-Jun Duan, Xiao Wei, Dian-Ming Kang, Mai-Juan Ma |
| 235 | EPI_ISL_414941 | hCoV-19/Shandong/LY008/2020     | <i>Homo sapiens</i> | Asia / China / Shandong                             | 2020-01-30 | Shandong Provincial Center for Disease Control and Prevention                                                                                                                                                    | Beijing Institute of Microbiology and Epidemiology                           | Xiao-Lin Jiang, Xiao-Li Zhang, Xiang-Na Zhao, Cun-Bao Li, Jie Lei, Zeng-Qiang Kou, Wen-Kui Sun, Yang Hang, Feng Gao, Sheng-Xiang Ji, Can-Fang Lin, Bo Pang, Ming-Xiao Yao, Guo-Lin Wang, Lin Yao, Li-Jun Duan, Xiao Wei, Dian-Ming Kang, Mai-Juan Ma |
| 236 | EPI_ISL_415153 | hCoV-19/Belgium/VLM-03011/2020  | <i>Homo sapiens</i> | Europe / Belgium / Huldenberg                       | 2020-03-03 | KU Leuven, Clinical and Epidemiological Virology                                                                                                                                                                 | KU Leuven, Clinical and Epidemiological Virology                             | Bert Vanmechelen, Joan Marti-Carreras, Tony Wawina, Marc Van Ranst, Piet Maes                                                                                                                                                                        |
| 237 | EPI_ISL_415154 | hCoV-19/Belgium/BM-03012/2020   | <i>Homo sapiens</i> | Europe / Belgium / Kraainem                         | 2020-03-01 | KU Leuven, Clinical and Epidemiological Virology                                                                                                                                                                 | KU Leuven, Clinical and Epidemiological Virology                             | Bert Vanmechelen, Joan Marti-Carreras, Tony Wawina, Marc Van Ranst, Piet Maes                                                                                                                                                                        |
| 238 | EPI_ISL_415155 | hCoV-19/Belgium/VAG-03013/2020  | <i>Homo sapiens</i> | Europe / Belgium / Huldenberg                       | 2020-03-01 | KU Leuven, Clinical and Epidemiological Virology                                                                                                                                                                 | KU Leuven, Clinical and Epidemiological Virology                             | Bert Vanmechelen, Joan Marti-Carreras, Tony Wawina, Marc Van Ranst, Piet Maes                                                                                                                                                                        |
| 239 | EPI_ISL_415156 | hCoV-19/Belgium/SH-03014/2020   | <i>Homo sapiens</i> | Europe / Belgium / Huldenberg                       | 2020-03-01 | KU Leuven, Clinical and Epidemiological Virology                                                                                                                                                                 | KU Leuven, Clinical and Epidemiological Virology                             | Bert Vanmechelen, Joan Marti-Carreras, Tony Wawina, Piet Maes                                                                                                                                                                                        |
| 240 | EPI_ISL_415157 | hCoV-19/Belgium/BC-03016/2020   | <i>Homo sapiens</i> | Europe / Belgium / Sint-Niklaas                     | 2020-03-01 | KU Leuven, Clinical and Epidemiological Virology                                                                                                                                                                 | KU Leuven, Clinical and Epidemiological Virology                             | Bert Vanmechelen, Joan Marti-Carreras, Tony Wawina, Piet Maes                                                                                                                                                                                        |

|     |                |                                       |                     |                                                |            |                                                                                                                 |                                                                                  |                                                                                                                                                                                                                                                                                                                                                                                                                                   |
|-----|----------------|---------------------------------------|---------------------|------------------------------------------------|------------|-----------------------------------------------------------------------------------------------------------------|----------------------------------------------------------------------------------|-----------------------------------------------------------------------------------------------------------------------------------------------------------------------------------------------------------------------------------------------------------------------------------------------------------------------------------------------------------------------------------------------------------------------------------|
| 241 | EPI_ISL_415158 | hCoV-19/Belgium/QKJ-03015/2020        | <i>Homo sapiens</i> | Europe / Belgium / Brussels                    | 2020-03-01 | KU Leuven, Clinical and Epidemiological Virology                                                                | KU Leuven, Clinical and Epidemiological Virology                                 | Bert Vanmechelen, Joan Marti-Carreras, Tony Wawina, Piet Maes                                                                                                                                                                                                                                                                                                                                                                     |
| 242 | EPI_ISL_415159 | hCoV-19/Belgium/BA-02291/2020         | <i>Homo sapiens</i> | Europe / Belgium / Leuven                      | 2020-02-29 | KU Leuven, Clinical and Epidemiological Virology                                                                | KU Leuven, Clinical and Epidemiological Virology                                 | Bert Vanmechelen, Joan Marti-Carreras, Tony Wawina, Piet Maes                                                                                                                                                                                                                                                                                                                                                                     |
| 243 | EPI_ISL_415454 | hCoV-19/Switzerland/GE1422/2020       | <i>Homo sapiens</i> | Europe / Switzerland                           | 2020-02-28 | Hôpitaux universitaires de Genève Laboratoire de Virologie                                                      | Hôpitaux universitaires de Genève Laboratoire de Virologie                       | Laubscher F.                                                                                                                                                                                                                                                                                                                                                                                                                      |
| 244 | EPI_ISL_415456 | hCoV-19/Switzerland/BE6651/2020       | <i>Homo sapiens</i> | Europe / Switzerland                           | 2020-02-29 | Hôpitaux universitaires de Genève Laboratoire de Virologie                                                      | Hôpitaux universitaires de Genève Laboratoire de Virologie                       | Laubscher F.                                                                                                                                                                                                                                                                                                                                                                                                                      |
| 245 | EPI_ISL_415457 | hCoV-19/Switzerland/AG7120/2020       | <i>Homo sapiens</i> | Europe / Switzerland                           | 2020-02-29 | Hôpitaux universitaires de Genève Laboratoire de Virologie                                                      | Hôpitaux universitaires de Genève Laboratoire de Virologie                       | Laubscher F.                                                                                                                                                                                                                                                                                                                                                                                                                      |
| 245 | EPI_ISL_416743 | hCoV-19/Czech Republic/ChVir1912/2020 | <i>Homo sapiens</i> | Europe / Czech Republic / Prague               | 2020-03    | NRL for Influenza, Centrum Epidemiology and Microbiology of National Institute of Public Health, Czech Republic | Charite Universitaetsmedizin Berlin, Institute of Virology                       | Victor M Corman, Julia Schneider, Jörn Beheim-Schwarzbach, Talitha Veith, Barbara Muehleemann, Terry Jones, Akexander Nagy, Jaromira Vecerova, Dusan Trnka, Ludmila Novakova, Helena Jirincova, Christian Drosten                                                                                                                                                                                                                 |
| 246 | EPI_ISL_415458 | hCoV-19/Switzerland/GE8102/2020       | <i>Homo sapiens</i> | Europe / Switzerland                           | 2020-03-01 | Hôpitaux universitaires de Genève Laboratoire de Virologie                                                      | Hôpitaux universitaires de Genève Laboratoire de Virologie                       | Laubscher F.                                                                                                                                                                                                                                                                                                                                                                                                                      |
| 246 | EPI_ISL_416035 | hCoV-19/Brazil/SPBR-13/2020           | <i>Homo sapiens</i> | South America / Brazil / Sao Paulo / Sao Paulo | 2020-03-05 | National Influenza Center - Instituto Adolfo Lutz                                                               | Instituto Adolfo Lutz, Interdisciplinary Procedures Center, Strategic Laboratory | Claudio Tavares Sacchi, Claudia Regina Gonçalves, Carlos Henrique Camargo, Erica Valessa Ramos Gomes, Fabiana Cristina Pereira dos Santos, Daniela Bernardes Borges da Silva, Simone Guadagnucci Morillo, Adriano Abbud, Adriana Bugno, Maria do Carmo Sampaio Tavares Timenetsky, Terezinha Maria de Paiva                                                                                                                       |
| 247 | EPI_ISL_415460 | hCoV-19/Netherlands/Flevoland_1/2020  | <i>Homo sapiens</i> | Europe / Netherlands / Flevoland               | 2020-03-09 | Dutch COVID-19 response team                                                                                    | Erasmus Medical Center                                                           | David Nieuwenhuijse, Bas Oude Munnink, Reina Sikkema, Claudia Schapendonk, Irina Chestakova, Anne van der Linden, Mark Pronk, Pascal Lexmond, Corien Swaan, Manon Haverkate, Madelief Mollers, Mart Stein, Sandra Kengne Kanga Mobou, Jeroen van Kampen, Jolanda Voermans, Aura Timen, Corine GeurtsvanKessel, Annemiek van der Eijk, Richard Molenkamp, Marion Koopmans, on behalf of the Dutch national COVID-19 response team. |
| 247 | EPI_ISL_415465 | hCoV-19/Netherlands/NA_1/2020         | <i>Homo sapiens</i> | Europe / Netherlands                           | 2020-03-10 | Dutch COVID-19 response team                                                                                    | Erasmus Medical Center                                                           | David Nieuwenhuijse, Bas Oude Munnink, Reina Sikkema, Claudia Schapendonk, Irina Chestakova, Anne van der Linden, Mark Pronk, Pascal Lexmond, Corien Swaan, Manon Haverkate, Madelief Mollers, Mart Stein, Sandra Kengne Kanga Mobou, Jeroen van Kampen, Jolanda Voermans, Aura Timen, Corine GeurtsvanKessel, Annemiek van der Eijk, Richard Molenkamp, Marion Koopmans, on behalf of the Dutch national COVID-19 response team. |
| 247 | EPI_ISL_415466 | hCoV-19/Netherlands/NA_10/2020        | <i>Homo sapiens</i> | Europe / Netherlands                           | 2020-03-09 | Dutch COVID-19 response team                                                                                    | Erasmus Medical Center                                                           | David Nieuwenhuijse, Bas Oude Munnink, Reina Sikkema, Claudia Schapendonk, Irina Chestakova, Anne van der Linden, Mark Pronk, Pascal Lexmond, Corien Swaan, Manon Haverkate, Madelief Mollers, Mart Stein, Sandra Kengne Kanga Mobou, Jeroen van Kampen, Jolanda Voermans, Aura Timen, Corine GeurtsvanKessel, Annemiek van der Eijk, Richard Molenkamp, Marion Koopmans, on behalf of the Dutch national COVID-19 response team. |



|     |                |                                          |                     |                                      |            |                              |                        |                                                                                                                                                                                                                                                                                                                                                                                                                                   |
|-----|----------------|------------------------------------------|---------------------|--------------------------------------|------------|------------------------------|------------------------|-----------------------------------------------------------------------------------------------------------------------------------------------------------------------------------------------------------------------------------------------------------------------------------------------------------------------------------------------------------------------------------------------------------------------------------|
| 247 | EPI_ISL_415469 | hCoV-19/Netherlands/NA_13/2020           | <i>Homo sapiens</i> | Europe / Netherlands                 | 2020-03-10 | Dutch COVID-19 response team | Erasmus Medical Center | David Nieuwenhuijse, Bas Oude Munnink, Reina Sikkema, Claudia Schapendonk, Irina Chestakova, Anne van der Linden, Mark Pronk, Pascal Lexmond, Corien Swaan, Manon Haverkate, Madelief Mollers, Mart Stein, Sandra Kengne Kanga Mobou, Jeroen van Kampen, Jolanda Voermans, Aura Timen, Corine GeurtsvanKessel, Annemiek van der Eijk, Richard Molenkamp, Marion Koopmans, on behalf of the Dutch national COVID-19 response team. |
| 247 | EPI_ISL_415515 | hCoV-19/Netherlands/NoordBrabant_59/2020 | <i>Homo sapiens</i> | Europe / Netherlands / Noord Brabant | 2020-03-11 | Dutch COVID-19 response team | Erasmus Medical Center | David Nieuwenhuijse, Bas Oude Munnink, Reina Sikkema, Claudia Schapendonk, Irina Chestakova, Anne van der Linden, Mark Pronk, Pascal Lexmond, Corien Swaan, Manon Haverkate, Madelief Mollers, Mart Stein, Sandra Kengne Kanga Mobou, Jeroen van Kampen, Jolanda Voermans, Aura Timen, Corine GeurtsvanKessel, Annemiek van der Eijk, Richard Molenkamp, Marion Koopmans, on behalf of the Dutch national COVID-19 response team. |
| 248 | EPI_ISL_415461 | hCoV-19/Netherlands/Gelderland_1/2020    | <i>Homo sapiens</i> | Europe / Netherlands / Gelderland    | 2020-03-10 | Dutch COVID-19 response team | Erasmus Medical Center | David Nieuwenhuijse, Bas Oude Munnink, Reina Sikkema, Claudia Schapendonk, Irina Chestakova, Anne van der Linden, Mark Pronk, Pascal Lexmond, Corien Swaan, Manon Haverkate, Madelief Mollers, Mart Stein, Sandra Kengne Kanga Mobou, Jeroen van Kampen, Jolanda Voermans, Aura Timen, Corine GeurtsvanKessel, Annemiek van der Eijk, Richard Molenkamp, Marion Koopmans, on behalf of the Dutch national COVID-19 response team. |
| 248 | EPI_ISL_415526 | hCoV-19/Netherlands/Utrecht_17/2020      | <i>Homo sapiens</i> | Europe / Netherlands / Utrecht       | 2020-03-10 | Dutch COVID-19 response team | Erasmus Medical Center | David Nieuwenhuijse, Bas Oude Munnink, Reina Sikkema, Claudia Schapendonk, Irina Chestakova, Anne van der Linden, Mark Pronk, Pascal Lexmond, Corien Swaan, Manon Haverkate, Madelief Mollers, Mart Stein, Sandra Kengne Kanga Mobou, Jeroen van Kampen, Jolanda Voermans, Aura Timen, Corine GeurtsvanKessel, Annemiek van der Eijk, Richard Molenkamp, Marion Koopmans, on behalf of the Dutch national COVID-19 response team. |
| 249 | EPI_ISL_415462 | hCoV-19/Netherlands/Gelderland_2/2020    | <i>Homo sapiens</i> | Europe / Netherlands / Gelderland    | 2020-03-09 | Dutch COVID-19 response team | Erasmus Medical Center | David Nieuwenhuijse, Bas Oude Munnink, Reina Sikkema, Claudia Schapendonk, Irina Chestakova, Anne van der Linden, Mark Pronk, Pascal Lexmond, Corien Swaan, Manon Haverkate, Madelief Mollers, Mart Stein, Sandra Kengne Kanga Mobou, Jeroen van Kampen, Jolanda Voermans, Aura Timen, Corine GeurtsvanKessel, Annemiek van der Eijk, Richard Molenkamp, Marion Koopmans, on behalf of the Dutch national COVID-19 response team. |
| 249 | EPI_ISL_415518 | hCoV-19/Netherlands/NoordBrabant_62/2020 | <i>Homo sapiens</i> | Europe / Netherlands / Noord Brabant | 2020       | Dutch COVID-19 response team | Erasmus Medical Center | David Nieuwenhuijse, Bas Oude Munnink, Reina Sikkema, Claudia Schapendonk, Irina Chestakova, Anne van der Linden, Mark Pronk, Pascal Lexmond, Corien Swaan, Manon Haverkate, Madelief Mollers, Mart Stein, Sandra Kengne Kanga Mobou, Jeroen van Kampen, Jolanda Voermans, Aura Timen, Corine GeurtsvanKessel, Annemiek van der Eijk, Richard Molenkamp, Marion Koopmans, on behalf of the Dutch national COVID-19 response team. |
| 249 | EPI_ISL_415520 | hCoV-19/Netherlands/NoordBrabant_64/2020 | <i>Homo sapiens</i> | Europe / Netherlands / Noord Brabant | 2020       | Dutch COVID-19 response team | Erasmus Medical Center | David Nieuwenhuijse, Bas Oude Munnink, Reina Sikkema, Claudia Schapendonk, Irina Chestakova, Anne van der Linden, Mark Pronk, Pascal Lexmond, Corien Swaan, Manon Haverkate, Madelief Mollers, Mart Stein, Sandra Kengne Kanga Mobou, Jeroen van Kampen, Jolanda Voermans, Aura Timen, Corine GeurtsvanKessel, Annemiek van der Eijk, Richard Molenkamp, Marion Koopmans, on behalf of the Dutch national COVID-19 response team. |

|     |                |                                          |                     |                                      |            |                              |                        |                                                                                                                                                                                                                                                                                                                                                                                                                                  |
|-----|----------------|------------------------------------------|---------------------|--------------------------------------|------------|------------------------------|------------------------|----------------------------------------------------------------------------------------------------------------------------------------------------------------------------------------------------------------------------------------------------------------------------------------------------------------------------------------------------------------------------------------------------------------------------------|
| 250 | EPI_ISL_415464 | hCoV-19/Netherlands/Limburg_7/2020       | <i>Homo sapiens</i> | Europe / Netherlands / Limburg       | 2020       | Dutch COVID-19 response team | Erasmus Medical Center | David Nieuwenhuijse, Bas Oude Munnink, Reina Sikkema, Claudia Schapendonk, Irina Chestakova, Anne van der Linden, Mark Pronk, Pascal Lexmond, Corien Swaan, Manon Haverkate, Madelief Mollers, Mart Stein, Sandra Kengne Kanga Mobou, Jeroen van Kampen, Jolanda Voermans, Aura Timen, Corine GeurtsvanKessel, Anemiek van der Eijk, Richard Molenkamp, Marion Koopmans, on behalf of the Dutch national COVID-19 response team. |
| 251 | EPI_ISL_415467 | hCoV-19/Netherlands/NA_11/2020           | <i>Homo sapiens</i> | Europe / Netherlands                 | 2020-03-10 | Dutch COVID-19 response team | Erasmus Medical Center | David Nieuwenhuijse, Bas Oude Munnink, Reina Sikkema, Claudia Schapendonk, Irina Chestakova, Anne van der Linden, Mark Pronk, Pascal Lexmond, Corien Swaan, Manon Haverkate, Madelief Mollers, Mart Stein, Sandra Kengne Kanga Mobou, Jeroen van Kampen, Jolanda Voermans, Aura Timen, Corine GeurtsvanKessel, Anemiek van der Eijk, Richard Molenkamp, Marion Koopmans, on behalf of the Dutch national COVID-19 response team. |
| 251 | EPI_ISL_415483 | hCoV-19/Netherlands/NA_26/2020           | <i>Homo sapiens</i> | Europe / Netherlands                 | 2020-03-09 | Dutch COVID-19 response team | Erasmus Medical Center | David Nieuwenhuijse, Bas Oude Munnink, Reina Sikkema, Claudia Schapendonk, Irina Chestakova, Anne van der Linden, Mark Pronk, Pascal Lexmond, Corien Swaan, Manon Haverkate, Madelief Mollers, Mart Stein, Sandra Kengne Kanga Mobou, Jeroen van Kampen, Jolanda Voermans, Aura Timen, Corine GeurtsvanKessel, Anemiek van der Eijk, Richard Molenkamp, Marion Koopmans, on behalf of the Dutch national COVID-19 response team. |
| 252 | EPI_ISL_415468 | hCoV-19/Netherlands/NA_12/2020           | <i>Homo sapiens</i> | Europe / Netherlands                 | 2020-03-10 | Dutch COVID-19 response team | Erasmus Medical Center | David Nieuwenhuijse, Bas Oude Munnink, Reina Sikkema, Claudia Schapendonk, Irina Chestakova, Anne van der Linden, Mark Pronk, Pascal Lexmond, Corien Swaan, Manon Haverkate, Madelief Mollers, Mart Stein, Sandra Kengne Kanga Mobou, Jeroen van Kampen, Jolanda Voermans, Aura Timen, Corine GeurtsvanKessel, Anemiek van der Eijk, Richard Molenkamp, Marion Koopmans, on behalf of the Dutch national COVID-19 response team. |
| 252 | EPI_ISL_415511 | hCoV-19/Netherlands/NoordBrabant_55/2020 | <i>Homo sapiens</i> | Europe / Netherlands / Noord Brabant | 2020-03-09 | Dutch COVID-19 response team | Erasmus Medical Center | David Nieuwenhuijse, Bas Oude Munnink, Reina Sikkema, Claudia Schapendonk, Irina Chestakova, Anne van der Linden, Mark Pronk, Pascal Lexmond, Corien Swaan, Manon Haverkate, Madelief Mollers, Mart Stein, Sandra Kengne Kanga Mobou, Jeroen van Kampen, Jolanda Voermans, Aura Timen, Corine GeurtsvanKessel, Anemiek van der Eijk, Richard Molenkamp, Marion Koopmans, on behalf of the Dutch national COVID-19 response team. |
| 252 | EPI_ISL_415530 | hCoV-19/Netherlands/ZuidHolland_26/2020  | <i>Homo sapiens</i> | Europe / Netherlands / Zuid Holland  | 2020-03-09 | Dutch COVID-19 response team | Erasmus Medical Center | David Nieuwenhuijse, Bas Oude Munnink, Reina Sikkema, Claudia Schapendonk, Irina Chestakova, Anne van der Linden, Mark Pronk, Pascal Lexmond, Corien Swaan, Manon Haverkate, Madelief Mollers, Mart Stein, Sandra Kengne Kanga Mobou, Jeroen van Kampen, Jolanda Voermans, Aura Timen, Corine GeurtsvanKessel, Anemiek van der Eijk, Richard Molenkamp, Marion Koopmans, on behalf of the Dutch national COVID-19 response team. |
| 253 | EPI_ISL_415471 | hCoV-19/Netherlands/NA_15/2020           | <i>Homo sapiens</i> | Europe / Netherlands                 | 2020-03-11 | Dutch COVID-19 response team | Erasmus Medical Center | David Nieuwenhuijse, Bas Oude Munnink, Reina Sikkema, Claudia Schapendonk, Irina Chestakova, Anne van der Linden, Mark Pronk, Pascal Lexmond, Corien Swaan, Manon Haverkate, Madelief Mollers, Mart Stein, Sandra Kengne Kanga Mobou, Jeroen van Kampen, Jolanda Voermans, Aura Timen, Corine GeurtsvanKessel, Anemiek van der Eijk, Richard Molenkamp, Marion Koopmans, on behalf of the Dutch national COVID-19 response team. |

|     |                |                                          |                     |                                      |            |                              |                        |                                                                                                                                                                                                                                                                                                                                                                                                                                  |
|-----|----------------|------------------------------------------|---------------------|--------------------------------------|------------|------------------------------|------------------------|----------------------------------------------------------------------------------------------------------------------------------------------------------------------------------------------------------------------------------------------------------------------------------------------------------------------------------------------------------------------------------------------------------------------------------|
| 254 | EPI_ISL_415472 | hCoV-19/Netherlands/NA_16/2020           | <i>Homo sapiens</i> | Europe / Netherlands                 | 2020-03-11 | Dutch COVID-19 response team | Erasmus Medical Center | David Nieuwenhuijse, Bas Oude Munnink, Reina Sikkema, Claudia Schapendonk, Irina Chestakova, Anne van der Linden, Mark Pronk, Pascal Lexmond, Corien Swaan, Manon Haverkate, Madelief Mollers, Mart Stein, Sandra Kengne Kanga Mobou, Jeroen van Kampen, Jolanda Voermans, Aura Timen, Corine GeurtsvanKessel, Anemiek van der Eijk, Richard Molenkamp, Marion Koopmans, on behalf of the Dutch national COVID-19 response team. |
| 255 | EPI_ISL_415473 | hCoV-19/Netherlands/NA_17/2020           | <i>Homo sapiens</i> | Europe / Netherlands                 | 2020-03-09 | Dutch COVID-19 response team | Erasmus Medical Center | David Nieuwenhuijse, Bas Oude Munnink, Reina Sikkema, Claudia Schapendonk, Irina Chestakova, Anne van der Linden, Mark Pronk, Pascal Lexmond, Corien Swaan, Manon Haverkate, Madelief Mollers, Mart Stein, Sandra Kengne Kanga Mobou, Jeroen van Kampen, Jolanda Voermans, Aura Timen, Corine GeurtsvanKessel, Anemiek van der Eijk, Richard Molenkamp, Marion Koopmans, on behalf of the Dutch national COVID-19 response team. |
| 255 | EPI_ISL_415474 | hCoV-19/Netherlands/NA_18/2020           | <i>Homo sapiens</i> | Europe / Netherlands                 | 2020-03-09 | Dutch COVID-19 response team | Erasmus Medical Center | David Nieuwenhuijse, Bas Oude Munnink, Reina Sikkema, Claudia Schapendonk, Irina Chestakova, Anne van der Linden, Mark Pronk, Pascal Lexmond, Corien Swaan, Manon Haverkate, Madelief Mollers, Mart Stein, Sandra Kengne Kanga Mobou, Jeroen van Kampen, Jolanda Voermans, Aura Timen, Corine GeurtsvanKessel, Anemiek van der Eijk, Richard Molenkamp, Marion Koopmans, on behalf of the Dutch national COVID-19 response team. |
| 255 | EPI_ISL_415499 | hCoV-19/Netherlands/NoordBrabant_41/2020 | <i>Homo sapiens</i> | Europe / Netherlands / Noord Brabant | 2020       | Dutch COVID-19 response team | Erasmus Medical Center | David Nieuwenhuijse, Bas Oude Munnink, Reina Sikkema, Claudia Schapendonk, Irina Chestakova, Anne van der Linden, Mark Pronk, Pascal Lexmond, Corien Swaan, Manon Haverkate, Madelief Mollers, Mart Stein, Sandra Kengne Kanga Mobou, Jeroen van Kampen, Jolanda Voermans, Aura Timen, Corine GeurtsvanKessel, Anemiek van der Eijk, Richard Molenkamp, Marion Koopmans, on behalf of the Dutch national COVID-19 response team. |
| 256 | EPI_ISL_415475 | hCoV-19/Netherlands/NA_19/2020           | <i>Homo sapiens</i> | Europe / Netherlands                 | 2020-03-12 | Dutch COVID-19 response team | Erasmus Medical Center | David Nieuwenhuijse, Bas Oude Munnink, Reina Sikkema, Claudia Schapendonk, Irina Chestakova, Anne van der Linden, Mark Pronk, Pascal Lexmond, Corien Swaan, Manon Haverkate, Madelief Mollers, Mart Stein, Sandra Kengne Kanga Mobou, Jeroen van Kampen, Jolanda Voermans, Aura Timen, Corine GeurtsvanKessel, Anemiek van der Eijk, Richard Molenkamp, Marion Koopmans, on behalf of the Dutch national COVID-19 response team. |
| 257 | EPI_ISL_415476 | hCoV-19/Netherlands/NA_2/2020            | <i>Homo sapiens</i> | Europe / Netherlands                 | 2020-03-10 | Dutch COVID-19 response team | Erasmus Medical Center | David Nieuwenhuijse, Bas Oude Munnink, Reina Sikkema, Claudia Schapendonk, Irina Chestakova, Anne van der Linden, Mark Pronk, Pascal Lexmond, Corien Swaan, Manon Haverkate, Madelief Mollers, Mart Stein, Sandra Kengne Kanga Mobou, Jeroen van Kampen, Jolanda Voermans, Aura Timen, Corine GeurtsvanKessel, Anemiek van der Eijk, Richard Molenkamp, Marion Koopmans, on behalf of the Dutch national COVID-19 response team. |
| 258 | EPI_ISL_415478 | hCoV-19/Netherlands/NA_21/2020           | <i>Homo sapiens</i> | Europe / Netherlands                 | 2020-03-08 | Dutch COVID-19 response team | Erasmus Medical Center | David Nieuwenhuijse, Bas Oude Munnink, Reina Sikkema, Claudia Schapendonk, Irina Chestakova, Anne van der Linden, Mark Pronk, Pascal Lexmond, Corien Swaan, Manon Haverkate, Madelief Mollers, Mart Stein, Sandra Kengne Kanga Mobou, Jeroen van Kampen, Jolanda Voermans, Aura Timen, Corine GeurtsvanKessel, Anemiek van der Eijk, Richard Molenkamp, Marion Koopmans, on behalf of the Dutch national COVID-19 response team. |

|     |                |                                |                     |                      |            |                              |                        |                                                                                                                                                                                                                                                                                                                                                                                                                                  |
|-----|----------------|--------------------------------|---------------------|----------------------|------------|------------------------------|------------------------|----------------------------------------------------------------------------------------------------------------------------------------------------------------------------------------------------------------------------------------------------------------------------------------------------------------------------------------------------------------------------------------------------------------------------------|
| 259 | EPI_ISL_415481 | hCoV-19/Netherlands/NA_24/2020 | <i>Homo sapiens</i> | Europe / Netherlands | 2020-03-08 | Dutch COVID-19 response team | Erasmus Medical Center | David Nieuwenhuijse, Bas Oude Munnink, Reina Sikkema, Claudia Schapendonk, Irina Chestakova, Anne van der Linden, Mark Pronk, Pascal Lexmond, Corien Swaan, Manon Haverkate, Madelief Mollers, Mart Stein, Sandra Kengne Kanga Mobou, Jeroen van Kampen, Jolanda Voermans, Aura Timen, Corine GeurtsvanKessel, Anemiek van der Eijk, Richard Molenkamp, Marion Koopmans, on behalf of the Dutch national COVID-19 response team. |
| 260 | EPI_ISL_415482 | hCoV-19/Netherlands/NA_25/2020 | <i>Homo sapiens</i> | Europe / Netherlands | 2020-03-09 | Dutch COVID-19 response team | Erasmus Medical Center | David Nieuwenhuijse, Bas Oude Munnink, Reina Sikkema, Claudia Schapendonk, Irina Chestakova, Anne van der Linden, Mark Pronk, Pascal Lexmond, Corien Swaan, Manon Haverkate, Madelief Mollers, Mart Stein, Sandra Kengne Kanga Mobou, Jeroen van Kampen, Jolanda Voermans, Aura Timen, Corine GeurtsvanKessel, Anemiek van der Eijk, Richard Molenkamp, Marion Koopmans, on behalf of the Dutch national COVID-19 response team. |
| 261 | EPI_ISL_415485 | hCoV-19/Netherlands/NA_28/2020 | <i>Homo sapiens</i> | Europe / Netherlands | 2020-03-12 | Dutch COVID-19 response team | Erasmus Medical Center | David Nieuwenhuijse, Bas Oude Munnink, Reina Sikkema, Claudia Schapendonk, Irina Chestakova, Anne van der Linden, Mark Pronk, Pascal Lexmond, Corien Swaan, Manon Haverkate, Madelief Mollers, Mart Stein, Sandra Kengne Kanga Mobou, Jeroen van Kampen, Jolanda Voermans, Aura Timen, Corine GeurtsvanKessel, Anemiek van der Eijk, Richard Molenkamp, Marion Koopmans, on behalf of the Dutch national COVID-19 response team. |
| 262 | EPI_ISL_415486 | hCoV-19/Netherlands/NA_29/2020 | <i>Homo sapiens</i> | Europe / Netherlands | 2020-03-13 | Dutch COVID-19 response team | Erasmus Medical Center | David Nieuwenhuijse, Bas Oude Munnink, Reina Sikkema, Claudia Schapendonk, Irina Chestakova, Anne van der Linden, Mark Pronk, Pascal Lexmond, Corien Swaan, Manon Haverkate, Madelief Mollers, Mart Stein, Sandra Kengne Kanga Mobou, Jeroen van Kampen, Jolanda Voermans, Aura Timen, Corine GeurtsvanKessel, Anemiek van der Eijk, Richard Molenkamp, Marion Koopmans, on behalf of the Dutch national COVID-19 response team. |
| 263 | EPI_ISL_415487 | hCoV-19/Netherlands/NA_30/2020 | <i>Homo sapiens</i> | Europe / Netherlands | 2020-03-13 | Dutch COVID-19 response team | Erasmus Medical Center | David Nieuwenhuijse, Bas Oude Munnink, Reina Sikkema, Claudia Schapendonk, Irina Chestakova, Anne van der Linden, Mark Pronk, Pascal Lexmond, Corien Swaan, Manon Haverkate, Madelief Mollers, Mart Stein, Sandra Kengne Kanga Mobou, Jeroen van Kampen, Jolanda Voermans, Aura Timen, Corine GeurtsvanKessel, Anemiek van der Eijk, Richard Molenkamp, Marion Koopmans, on behalf of the Dutch national COVID-19 response team. |
| 264 | EPI_ISL_415488 | hCoV-19/Netherlands/NA_31/2020 | <i>Homo sapiens</i> | Europe / Netherlands | 2020-03-13 | Dutch COVID-19 response team | Erasmus Medical Center | David Nieuwenhuijse, Bas Oude Munnink, Reina Sikkema, Claudia Schapendonk, Irina Chestakova, Anne van der Linden, Mark Pronk, Pascal Lexmond, Corien Swaan, Manon Haverkate, Madelief Mollers, Mart Stein, Sandra Kengne Kanga Mobou, Jeroen van Kampen, Jolanda Voermans, Aura Timen, Corine GeurtsvanKessel, Anemiek van der Eijk, Richard Molenkamp, Marion Koopmans, on behalf of the Dutch national COVID-19 response team. |
| 265 | EPI_ISL_415491 | hCoV-19/Netherlands/NA_34/2020 | <i>Homo sapiens</i> | Europe / Netherlands | 2020-03-07 | Dutch COVID-19 response team | Erasmus Medical Center | David Nieuwenhuijse, Bas Oude Munnink, Reina Sikkema, Claudia Schapendonk, Irina Chestakova, Anne van der Linden, Mark Pronk, Pascal Lexmond, Corien Swaan, Manon Haverkate, Madelief Mollers, Mart Stein, Sandra Kengne Kanga Mobou, Jeroen van Kampen, Jolanda Voermans, Aura Timen, Corine GeurtsvanKessel, Anemiek van der Eijk, Richard Molenkamp, Marion Koopmans, on behalf of the Dutch national COVID-19 response team. |

|     |                |                                          |                     |                                      |            |                              |                        |                                                                                                                                                                                                                                                                                                                                                                                                                                   |
|-----|----------------|------------------------------------------|---------------------|--------------------------------------|------------|------------------------------|------------------------|-----------------------------------------------------------------------------------------------------------------------------------------------------------------------------------------------------------------------------------------------------------------------------------------------------------------------------------------------------------------------------------------------------------------------------------|
| 266 | EPI_ISL_415492 | hCoV-19/Netherlands/NA_35/2020           | <i>Homo sapiens</i> | Europe / Netherlands                 | 2020-03-10 | Dutch COVID-19 response team | Erasmus Medical Center | David Nieuwenhuijse, Bas Oude Munnink, Reina Sikkema, Claudia Schapendonk, Irina Chestakova, Anne van der Linden, Mark Pronk, Pascal Lexmond, Corien Swaan, Manon Haverkate, Madelief Mollers, Mart Stein, Sandra Kengne Kanga Mobou, Jeroen van Kampen, Jolanda Voermans, Aura Timen, Corine GeurtsvanKessel, Annemiek van der Eijk, Richard Molenkamp, Marion Koopmans, on behalf of the Dutch national COVID-19 response team. |
| 267 | EPI_ISL_415495 | hCoV-19/Netherlands/NA_6/2020            | <i>Homo sapiens</i> | Europe / Netherlands                 | 2020-03-10 | Dutch COVID-19 response team | Erasmus Medical Center | David Nieuwenhuijse, Bas Oude Munnink, Reina Sikkema, Claudia Schapendonk, Irina Chestakova, Anne van der Linden, Mark Pronk, Pascal Lexmond, Corien Swaan, Manon Haverkate, Madelief Mollers, Mart Stein, Sandra Kengne Kanga Mobou, Jeroen van Kampen, Jolanda Voermans, Aura Timen, Corine GeurtsvanKessel, Annemiek van der Eijk, Richard Molenkamp, Marion Koopmans, on behalf of the Dutch national COVID-19 response team. |
| 268 | EPI_ISL_415503 | hCoV-19/Netherlands/NoordBrabant_46/2020 | <i>Homo sapiens</i> | Europe / Netherlands / Noord Brabant | 2020-03-11 | Dutch COVID-19 response team | Erasmus Medical Center | David Nieuwenhuijse, Bas Oude Munnink, Reina Sikkema, Claudia Schapendonk, Irina Chestakova, Anne van der Linden, Mark Pronk, Pascal Lexmond, Corien Swaan, Manon Haverkate, Madelief Mollers, Mart Stein, Sandra Kengne Kanga Mobou, Jeroen van Kampen, Jolanda Voermans, Aura Timen, Corine GeurtsvanKessel, Annemiek van der Eijk, Richard Molenkamp, Marion Koopmans, on behalf of the Dutch national COVID-19 response team. |
| 269 | EPI_ISL_415512 | hCoV-19/Netherlands/NoordBrabant_56/2020 | <i>Homo sapiens</i> | Europe / Netherlands / Noord Brabant | 2020-03-09 | Dutch COVID-19 response team | Erasmus Medical Center | David Nieuwenhuijse, Bas Oude Munnink, Reina Sikkema, Claudia Schapendonk, Irina Chestakova, Anne van der Linden, Mark Pronk, Pascal Lexmond, Corien Swaan, Manon Haverkate, Madelief Mollers, Mart Stein, Sandra Kengne Kanga Mobou, Jeroen van Kampen, Jolanda Voermans, Aura Timen, Corine GeurtsvanKessel, Annemiek van der Eijk, Richard Molenkamp, Marion Koopmans, on behalf of the Dutch national COVID-19 response team. |
| 270 | EPI_ISL_415525 | hCoV-19/Netherlands/NoordHolland_3/2020  | <i>Homo sapiens</i> | Europe / Netherlands / Noord Holland | 2020-03-12 | Dutch COVID-19 response team | Erasmus Medical Center | David Nieuwenhuijse, Bas Oude Munnink, Reina Sikkema, Claudia Schapendonk, Irina Chestakova, Anne van der Linden, Mark Pronk, Pascal Lexmond, Corien Swaan, Manon Haverkate, Madelief Mollers, Mart Stein, Sandra Kengne Kanga Mobou, Jeroen van Kampen, Jolanda Voermans, Aura Timen, Corine GeurtsvanKessel, Annemiek van der Eijk, Richard Molenkamp, Marion Koopmans, on behalf of the Dutch national COVID-19 response team. |
| 271 | EPI_ISL_415527 | hCoV-19/Netherlands/Utrecht_18/2020      | <i>Homo sapiens</i> | Europe / Netherlands / Utrecht       | 2020-03-12 | Dutch COVID-19 response team | Erasmus Medical Center | David Nieuwenhuijse, Bas Oude Munnink, Reina Sikkema, Claudia Schapendonk, Irina Chestakova, Anne van der Linden, Mark Pronk, Pascal Lexmond, Corien Swaan, Manon Haverkate, Madelief Mollers, Mart Stein, Sandra Kengne Kanga Mobou, Jeroen van Kampen, Jolanda Voermans, Aura Timen, Corine GeurtsvanKessel, Annemiek van der Eijk, Richard Molenkamp, Marion Koopmans, on behalf of the Dutch national COVID-19 response team. |
| 272 | EPI_ISL_415531 | hCoV-19/Netherlands/ZuidHolland_27/2020  | <i>Homo sapiens</i> | Europe / Netherlands / Zuid Holland  | 2020-03-09 | Dutch COVID-19 response team | Erasmus Medical Center | David Nieuwenhuijse, Bas Oude Munnink, Reina Sikkema, Claudia Schapendonk, Irina Chestakova, Anne van der Linden, Mark Pronk, Pascal Lexmond, Corien Swaan, Manon Haverkate, Madelief Mollers, Mart Stein, Sandra Kengne Kanga Mobou, Jeroen van Kampen, Jolanda Voermans, Aura Timen, Corine GeurtsvanKessel, Annemiek van der Eijk, Richard Molenkamp, Marion Koopmans, on behalf of the Dutch national COVID-19 response team. |

|     |                |                                         |                     |                                            |            |                                |                                |                                                                                                                                                                                                                                                                                                                                                                                                                                   |
|-----|----------------|-----------------------------------------|---------------------|--------------------------------------------|------------|--------------------------------|--------------------------------|-----------------------------------------------------------------------------------------------------------------------------------------------------------------------------------------------------------------------------------------------------------------------------------------------------------------------------------------------------------------------------------------------------------------------------------|
| 273 | EPI_ISL_415532 | hCoV-19/Netherlands/ZuidHolland_28/2020 | <i>Homo sapiens</i> | Europe / Netherlands / Zuid Holland        | 2020-03-09 | Dutch COVID-19 response team   | Erasmus Medical Center         | David Nieuwenhuijse, Bas Oude Munnink, Reina Sikkema, Claudia Schapendonk, Irina Chestakova, Anne van der Linden, Mark Pronk, Pascal Lexmond, Corien Swaan, Manon Haverkate, Madelief Mollers, Mart Stein, Sandra Kengne Kanga Mobou, Jeroen van Kampen, Jolanda Voermans, Aura Timen, Corine GeurtsvanKessel, Annemiek van der Eijk, Richard Molenkamp, Marion Koopmans, on behalf of the Dutch national COVID-19 response team. |
| 274 | EPI_ISL_415535 | hCoV-19/Netherlands/ZuidHolland_31/2020 | <i>Homo sapiens</i> | Europe / Netherlands / Zuid Holland        | 2020-03-12 | Dutch COVID-19 response team   | Erasmus Medical Center         | David Nieuwenhuijse, Bas Oude Munnink, Reina Sikkema, Claudia Schapendonk, Irina Chestakova, Anne van der Linden, Mark Pronk, Pascal Lexmond, Corien Swaan, Manon Haverkate, Madelief Mollers, Mart Stein, Sandra Kengne Kanga Mobou, Jeroen van Kampen, Jolanda Voermans, Aura Timen, Corine GeurtsvanKessel, Annemiek van der Eijk, Richard Molenkamp, Marion Koopmans, on behalf of the Dutch national COVID-19 response team. |
| 275 | EPI_ISL_415539 | hCoV-19/USA/UPHL-01/2020                | <i>Homo sapiens</i> | North America / USA / Utah                 | 2020-03-13 | Utah Public Health Laboratory  | Utah Public Health Laboratory  | Erin Young, Kelly Oakeson                                                                                                                                                                                                                                                                                                                                                                                                         |
| 276 | EPI_ISL_415543 | hCoV-19/USA/UPHL-05/2020                | <i>Homo sapiens</i> | North America / USA / Utah                 | 2020-03-13 | Utah Public Health Laboratory  | Utah Public Health Laboratory  | Erin Young, Kelly Oakeson                                                                                                                                                                                                                                                                                                                                                                                                         |
| 276 | EPI_ISL_415544 | hCoV-19/USA/UPHL-06/2020                | <i>Homo sapiens</i> | North America / USA / Utah                 | 2020-03-13 | Utah Public Health Laboratory  | Utah Public Health Laboratory  | Erin Young, Kelly Oakeson                                                                                                                                                                                                                                                                                                                                                                                                         |
| 277 | EPI_ISL_415581 | hCoV-19/Canada/BC_02421/2020            | <i>Homo sapiens</i> | North America / Canada / British Columbia  | 2020-03-01 | BCCDC Public Health Laboratory | BCCDC Public Health Laboratory | Harrigan, Prystajecy, Krajden, Lee, Kamelian, Lapointe, Choi, Hoang, Sekirov, Levett, Tyson, Snutch, Loman, Quick, Li, Gilmour                                                                                                                                                                                                                                                                                                    |
| 278 | EPI_ISL_415583 | hCoV-19/Canada/BC_40860/2020            | <i>Homo sapiens</i> | North America / Canada / British Columbia  | 2020-03-03 | BCCDC Public Health Laboratory | BCCDC Public Health Laboratory | Harrigan, Prystajecy, Krajden, Lee, Kamelian, Lapointe, Choi, Hoang, Sekirov, Levett, Tyson, Snutch, Loman, Quick, Li, Gilmour                                                                                                                                                                                                                                                                                                    |
| 279 | EPI_ISL_415591 | hCoV-19/USA/WA-UW63/2020                | <i>Homo sapiens</i> | North America / USA / Washington           | 2020-03-10 | UW Virology Lab                | UW Virology Lab                | Pavitra Roychoudhury, Hong Xie, Keith Jerome, Alexander Greninger                                                                                                                                                                                                                                                                                                                                                                 |
| 280 | EPI_ISL_415594 | hCoV-19/USA/WA-UW66/2020                | <i>Homo sapiens</i> | North America / USA / Washington           | 2020-03-10 | UW Virology Lab                | UW Virology Lab                | Pavitra Roychoudhury, Hong Xie, Keith Jerome, Alexander Greninger                                                                                                                                                                                                                                                                                                                                                                 |
| 281 | EPI_ISL_415595 | hCoV-19/USA/WA-UW67/2020                | <i>Homo sapiens</i> | North America / USA / Washington           | 2020-03-09 | UW Virology Lab                | UW Virology Lab                | Pavitra Roychoudhury, Hong Xie, Keith Jerome, Alexander Greninger                                                                                                                                                                                                                                                                                                                                                                 |
| 282 | EPI_ISL_415596 | hCoV-19/USA/WA-UW68/2020                | <i>Homo sapiens</i> | North America / USA / Washington           | 2020-03-09 | UW Virology Lab                | UW Virology Lab                | Pavitra Roychoudhury, Hong Xie, Keith Jerome, Alexander Greninger                                                                                                                                                                                                                                                                                                                                                                 |
| 283 | EPI_ISL_415597 | hCoV-19/USA/WA-UW69/2020                | <i>Homo sapiens</i> | North America / USA / Washington / Seattle | 2020-03-10 | UW Virology Lab                | UW Virology Lab                | Pavitra Roychoudhury, Hong Xie, Keith Jerome, Alexander Greninger                                                                                                                                                                                                                                                                                                                                                                 |
| 284 | EPI_ISL_415598 | hCoV-19/USA/WA-UW70/2020                | <i>Homo sapiens</i> | North America / USA / Washington           | 2020-03-10 | UW Virology Lab                | UW Virology Lab                | Pavitra Roychoudhury, Hong Xie, Keith Jerome, Alexander Greninger                                                                                                                                                                                                                                                                                                                                                                 |
| 285 | EPI_ISL_415601 | hCoV-19/USA/WA-UW73/2020                | <i>Homo sapiens</i> | North America / USA / Washington           | 2020-03-10 | UW Virology Lab                | UW Virology Lab                | Pavitra Roychoudhury, Hong Xie, Keith Jerome, Alexander Greninger                                                                                                                                                                                                                                                                                                                                                                 |
| 286 | EPI_ISL_415602 | hCoV-19/USA/WA-UW74/2020                | <i>Homo sapiens</i> | North America / USA / Washington / Seattle | 2020-03-10 | UW Virology Lab                | UW Virology Lab                | Pavitra Roychoudhury, Hong Xie, Keith Jerome, Alexander Greninger                                                                                                                                                                                                                                                                                                                                                                 |

|     |                |                              |                     |                                            |            |                                                                |                                                                |                                                                                                                                                                                               |
|-----|----------------|------------------------------|---------------------|--------------------------------------------|------------|----------------------------------------------------------------|----------------------------------------------------------------|-----------------------------------------------------------------------------------------------------------------------------------------------------------------------------------------------|
| 287 | EPI_ISL_415603 | hCoV-19/USA/WA-UW75/2020     | <i>Homo sapiens</i> | North America / USA / Washington / Seattle | 2020-03-10 | UW Virology Lab                                                | UW Virology Lab                                                | Pavitra Roychoudhury, Hong Xie, Keith Jerome, Alexander Greninger                                                                                                                             |
| 288 | EPI_ISL_415604 | hCoV-19/USA/WA-UW76/2020     | <i>Homo sapiens</i> | North America / USA / Washington           | 2020-03-10 | UW Virology Lab                                                | UW Virology Lab                                                | Pavitra Roychoudhury, Hong Xie, Keith Jerome, Alexander Greninger                                                                                                                             |
| 289 | EPI_ISL_415606 | hCoV-19/USA/WA-UW41/2020     | <i>Homo sapiens</i> | North America / USA / Washington           | 2020-03-08 | UW Virology Lab                                                | UW Virology Lab                                                | Pavitra Roychoudhury, Hong Xie, Keith Jerome, Alexander Greninger                                                                                                                             |
| 290 | EPI_ISL_415608 | hCoV-19/USA/WA-UW43/2020     | <i>Homo sapiens</i> | North America / USA / Washington           | 2020-03-08 | UW Virology Lab                                                | UW Virology Lab                                                | Pavitra Roychoudhury, Hong Xie, Keith Jerome, Alexander Greninger                                                                                                                             |
| 291 | EPI_ISL_415609 | hCoV-19/USA/WA-UW44/2020     | <i>Homo sapiens</i> | North America / USA / Washington           | 2020-03-08 | UW Virology Lab                                                | UW Virology Lab                                                | Pavitra Roychoudhury, Hong Xie, Keith Jerome, Alexander Greninger                                                                                                                             |
| 292 | EPI_ISL_415611 | hCoV-19/USA/WA-UW46/2020     | <i>Homo sapiens</i> | North America / USA / Washington           | 2020-03-09 | UW Virology Lab                                                | UW Virology Lab                                                | Pavitra Roychoudhury, Hong Xie, Keith Jerome, Alexander Greninger                                                                                                                             |
| 293 | EPI_ISL_415615 | hCoV-19/USA/WA-UW50/2020     | <i>Homo sapiens</i> | North America / USA / Washington           | 2020-03-08 | UW Virology Lab                                                | UW Virology Lab                                                | Pavitra Roychoudhury, Hong Xie, Keith Jerome, Alexander Greninger                                                                                                                             |
| 294 | EPI_ISL_415617 | hCoV-19/USA/WA-UW52/2020     | <i>Homo sapiens</i> | North America / USA / Washington           | 2020-03-09 | UW Virology Lab                                                | UW Virology Lab                                                | Pavitra Roychoudhury, Hong Xie, Keith Jerome, Alexander Greninger                                                                                                                             |
| 295 | EPI_ISL_415619 | hCoV-19/USA/WA-UW54/2020     | <i>Homo sapiens</i> | North America / USA / Washington           | 2020-03-09 | UW Virology Lab                                                | UW Virology Lab                                                | Pavitra Roychoudhury, Hong Xie, Keith Jerome, Alexander Greninger                                                                                                                             |
| 296 | EPI_ISL_415620 | hCoV-19/USA/WA-UW55/2020     | <i>Homo sapiens</i> | North America / USA / Washington           | 2020-03-09 | UW Virology Lab                                                | UW Virology Lab                                                | Pavitra Roychoudhury, Hong Xie, Keith Jerome, Alexander Greninger                                                                                                                             |
| 297 | EPI_ISL_415621 | hCoV-19/USA/WA-UW56/2020     | <i>Homo sapiens</i> | North America / USA / Washington / Seattle | 2020-03-09 | UW Virology Lab                                                | UW Virology Lab                                                | Pavitra Roychoudhury, Hong Xie, Keith Jerome, Alexander Greninger                                                                                                                             |
| 298 | EPI_ISL_415622 | hCoV-19/USA/WA-UW57/2020     | <i>Homo sapiens</i> | North America / USA / Washington           | 2020-03-09 | UW Virology Lab                                                | UW Virology Lab                                                | Pavitra Roychoudhury, Hong Xie, Keith Jerome, Alexander Greninger                                                                                                                             |
| 299 | EPI_ISL_415624 | hCoV-19/USA/WA-UW59/2020     | <i>Homo sapiens</i> | North America / USA / Washington           | 2020-03-09 | UW Virology Lab                                                | UW Virology Lab                                                | Pavitra Roychoudhury, Hong Xie, Keith Jerome, Alexander Greninger                                                                                                                             |
| 300 | EPI_ISL_415625 | hCoV-19/USA/WA-UW60/2020     | <i>Homo sapiens</i> | North America / USA / Washington           | 2020-03-09 | UW Virology Lab                                                | UW Virology Lab                                                | Pavitra Roychoudhury, Hong Xie, Keith Jerome, Alexander Greninger                                                                                                                             |
| 301 | EPI_ISL_415627 | hCoV-19/USA/WA-UW62/2020     | <i>Homo sapiens</i> | North America / USA / Washington           | 2020-03-09 | UW Virology Lab                                                | UW Virology Lab                                                | Pavitra Roychoudhury, Hong Xie, Keith Jerome, Alexander Greninger                                                                                                                             |
| 302 | EPI_ISL_415629 | hCoV-19/Scotland/EDB004/2020 | <i>Homo sapiens</i> | Europe / United Kingdom / Scotland         | 2020-03-04 | Virology Department, Royal Infirmary of Edinburgh, NHS Lothian | Virology Department, Royal Infirmary of Edinburgh, NHS Lothian | McHugh M, Dewar R, O'Toole Á, Rambaut A, Williams TC, Templeton K                                                                                                                             |
| 303 | EPI_ISL_415630 | hCoV-19/Scotland/CVR07/2020  | <i>Homo sapiens</i> | Europe / United Kingdom / Scotland         | 2020-03-09 | West of Scotland Specialist Virology Centre, NHSGSC            | MRC-University of Glasgow Centre for Virus Research            | Kathy Smollett, Daniel Mair, Stephen Carmichael, Ana da Silva Filipe; Richard Orton, David L Robertson; Alasdair MacLean, Rory Gunson; Natasha Jesudason, Kathy Li, Antonia Ho; Emma Thomson. |

|     |                |                              |                     |                                                             |            |                                                                                                                         |                                                                                                                         |                                                                                                                                                                                                                                                                                                                                                                                                                                                                                                                                                                  |
|-----|----------------|------------------------------|---------------------|-------------------------------------------------------------|------------|-------------------------------------------------------------------------------------------------------------------------|-------------------------------------------------------------------------------------------------------------------------|------------------------------------------------------------------------------------------------------------------------------------------------------------------------------------------------------------------------------------------------------------------------------------------------------------------------------------------------------------------------------------------------------------------------------------------------------------------------------------------------------------------------------------------------------------------|
| 304 | EPI_ISL_415631 | hCoV-19/Scotland/CVR10/2020  | <i>Homo sapiens</i> | Europe / United Kingdom / Scotland                          | 2020-03-10 | West of Scotland Specialist Virology Centre, NHSGGC                                                                     | MRC-University of Glasgow Centre for Virus Research                                                                     | Kathy Smollett, Daniel Mair, Stephen Carmichael, Ana da Silva Filipe; Richard Orton, David L Robertson; Alasdair MacLean, Rory Gunson; Natasha Jesudason, Kathy Li, Antonia Ho; Emma Thomson.                                                                                                                                                                                                                                                                                                                                                                    |
| 305 | EPI_ISL_415640 | hCoV-19/Scotland/EDB003/2020 | <i>Homo sapiens</i> | Europe / United Kingdom / Scotland                          | 2020-03-08 | Virology Department, Royal Infirmary of Edinburgh, NHS Lothian                                                          | Virology Department, Royal Infirmary of Edinburgh, NHS Lothian                                                          | McHugh M, Dewar R, O'Toole Á, Rambaut A, Williams TC, Templeton K                                                                                                                                                                                                                                                                                                                                                                                                                                                                                                |
| 306 | EPI_ISL_415641 | hCoV-19/Georgia/Tb-54/2020   | <i>Homo sapiens</i> | Asia / Georgia / Tbilisi                                    | 2020-02-27 | R. G. Lugar Center for Public Health Research, National Center for Disease Control and Public Health (NCDC) of Georgia. | R. G. Lugar Center for Public Health Research, National Center for Disease Control and Public Health (NCDC) of Georgia. | Nato Kotaria, Marine Murtskhvaladze, Ann Machablashvili, Lela Sabadze, Mari Gavashelidze, Ana Papkauri, Meri Pantsulaia, Gvantsa Brachveli, Tata Imnadze, Tamar Jashiasvili, Tea Tevdoradze, Ketevan Sidamonidze, Ekaterine Khmaladze, Ekaterine Zhghenti, Roena Sukhiashvili, Mariam Zakalashvili, Lela Urushadze, Magda Dgebuadze, Giorgi Tomashvili, Davit Tsaguria, Ekaterine Zangaladze, Nino Berishvili, Gvantsa Chanturia, Adam Kotorashvili, Maia Alkhazashvili, Irma Burjanadze, Anna Kasradze, Khatuna Zakhashvili, Paata Imnadze, Amiran Gamkrelidze. |
| 307 | EPI_ISL_415642 | hCoV-19/Georgia/Tb-477/2020  | <i>Homo sapiens</i> | Asia / Georgia / Tbilisi                                    | 2020-03-10 | R. G. Lugar Center for Public Health Research, National Center for Disease Control and Public Health (NCDC) of Georgia. | R. G. Lugar Center for Public Health Research, National Center for Disease Control and Public Health (NCDC) of Georgia. | Nato Kotaria, Marine Murtskhvaladze, Ann Machablashvili, Lela Sabadze, Mari Gavashelidze, Ana Papkauri, Meri Pantsulaia, Gvantsa Brachveli, Tata Imnadze, Tamar Jashiasvili, Tea Tevdoradze, Ketevan Sidamonidze, Ekaterine Khmaladze, Ekaterine Zhghenti, Roena Sukhiashvili, Mariam Zakalashvili, Lela Urushadze, Magda Dgebuadze, Giorgi Tomashvili, Davit Tsaguria, Ekaterine Zangaladze, Nino Berishvili, Gvantsa Chanturia, Adam Kotorashvili, Maia Alkhazashvili, Irma Burjanadze, Anna Kasradze, Khatuna Zakhashvili, Paata Imnadze, Amiran Gamkrelidze. |
| 308 | EPI_ISL_415643 | hCoV-19/Georgia/Tb-468/2020  | <i>Homo sapiens</i> | Asia / Georgia / Tbilisi                                    | 2020-03-10 | R. G. Lugar Center for Public Health Research, National Center for Disease Control and Public Health (NCDC) of Georgia. | R. G. Lugar Center for Public Health Research, National Center for Disease Control and Public Health (NCDC) of Georgia. | Nato Kotaria, Marine Murtskhvaladze, Ann Machablashvili, Lela Sabadze, Mari Gavashelidze, Ana Papkauri, Meri Pantsulaia, Gvantsa Brachveli, Tata Imnadze, Tamar Jashiasvili, Tea Tevdoradze, Ketevan Sidamonidze, Ekaterine Khmaladze, Ekaterine Zhghenti, Roena Sukhiashvili, Mariam Zakalashvili, Lela Urushadze, Magda Dgebuadze, Giorgi Tomashvili, Davit Tsaguria, Ekaterine Zangaladze, Nino Berishvili, Gvantsa Chanturia, Adam Kotorashvili, Maia Alkhazashvili, Irma Burjanadze, Anna Kasradze, Khatuna Zakhashvili, Paata Imnadze, Amiran Gamkrelidze. |
| 309 | EPI_ISL_415646 | hCoV-19/Denmark/SSI-101/2020 | <i>Homo sapiens</i> | Europe / Denmark                                            | 2020-03-03 | Department of Virus and Microbiological Special diagnostics, Statens Serum Institut, Copenhagen, Denmark.               | ViFU                                                                                                                    | Morten Rasmussen, Maiken Worsoe Rosenstjerne , Anders Fomsgaard                                                                                                                                                                                                                                                                                                                                                                                                                                                                                                  |
| 310 | EPI_ISL_415648 | hCoV-19/Denmark/SSI-104/2020 | <i>Homo sapiens</i> | Europe / Denmark                                            | 2020-03-03 | Department of Virus and Microbiological Special diagnostics, Statens Serum Institut, Copenhagen, Denmark.               | ViFU                                                                                                                    | Morten Rasmussen, Maiken Worsoe Rosenstjerne , Anders Fomsgaard                                                                                                                                                                                                                                                                                                                                                                                                                                                                                                  |
| 311 | EPI_ISL_415649 | hCoV-19/France/HF2039/2020   | <i>Homo sapiens</i> | Europe / France / Hauts-de-France / Crépy-en -Valois        | 2020-03-05 | unknown                                                                                                                 | National Reference Center for Viruses of Respiratory Infections, Institut Pasteur, Paris                                | Mélnie Albert, Marion Barbet, Sylvie Behillil, Méline Bizard, Angela Brisebarre, Flora Donati Vincent Enouf, Maud Vanpeene, Sylvie van der Werf                                                                                                                                                                                                                                                                                                                                                                                                                  |
| 312 | EPI_ISL_415651 | hCoV-19/France/BFC2094/2020  | <i>Homo sapiens</i> | Europe / France / Bourgogne-France-Comté / Montreux-Chateau | 2020-03-05 | Unknown                                                                                                                 | National Reference Center for Viruses of Respiratory Infections, Institut Pasteur, Paris                                | Mélnie Albert, Marion Barbet, Sylvie Behillil, Méline Bizard, Angela Brisebarre, Flora Donati Vincent Enouf, Maud Vanpeene, Sylvie van der Werf                                                                                                                                                                                                                                                                                                                                                                                                                  |



|     |                |                                  |                     |                                                     |            |                                                                                                                                                                                                                                |                                                                                                                                                                                                                                |                                                                                                                                                                                                                                               |
|-----|----------------|----------------------------------|---------------------|-----------------------------------------------------|------------|--------------------------------------------------------------------------------------------------------------------------------------------------------------------------------------------------------------------------------|--------------------------------------------------------------------------------------------------------------------------------------------------------------------------------------------------------------------------------|-----------------------------------------------------------------------------------------------------------------------------------------------------------------------------------------------------------------------------------------------|
| 313 | EPI_ISL_415652 | hCoV-19/France/BFC2147/2020      | <i>Homo sapiens</i> | Europe / France / Bourgogne-France-Comté / Thise    | 2020-03-05 | unknown                                                                                                                                                                                                                        | National Reference Center for Viruses of Respiratory Infections, Institut Pasteur, Paris                                                                                                                                       | Mélnie Albert, Marion Barbet, Sylvie Behillil, Méline Bizard, Angela Brisebarre, Flora Donati Vincent Enouf, Maud Vanpeene, Sylvie van der Werf                                                                                               |
| 314 | EPI_ISL_415698 | hCoV-19/Switzerland/GR2988/2020  | <i>Homo sapiens</i> | Europe / Switzerland                                | 2020-02-27 | Hôpitaux universitaires de Genève Laboratoire de Virologie                                                                                                                                                                     | Hôpitaux universitaires de Genève Laboratoire de Virologie                                                                                                                                                                     | Laubscher F.                                                                                                                                                                                                                                  |
| 314 | EPI_ISL_415699 | hCoV-19/Switzerland/GR3043/2020  | <i>Homo sapiens</i> | Europe / Switzerland                                | 2020-02-27 | Hôpitaux universitaires de Genève Laboratoire de Virologie                                                                                                                                                                     | Hôpitaux universitaires de Genève Laboratoire de Virologie                                                                                                                                                                     | Laubscher F.                                                                                                                                                                                                                                  |
| 315 | EPI_ISL_415700 | hCoV-19/Switzerland/GE1402/2020  | <i>Homo sapiens</i> | Europe / Switzerland                                | 2020-02-28 | Hôpitaux universitaires de Genève Laboratoire de Virologie                                                                                                                                                                     | Hôpitaux universitaires de Genève Laboratoire de Virologie                                                                                                                                                                     | Laubscher F.                                                                                                                                                                                                                                  |
| 316 | EPI_ISL_415702 | hCoV-19/Switzerland/SZ1417/2020  | <i>Homo sapiens</i> | Europe / Switzerland                                | 2020-03-02 | Hôpitaux universitaires de Genève Laboratoire de Virologie                                                                                                                                                                     | Hôpitaux universitaires de Genève Laboratoire de Virologie                                                                                                                                                                     | Laubscher F.                                                                                                                                                                                                                                  |
| 317 | EPI_ISL_415703 | hCoV-19/Switzerland/TI2045/2020  | <i>Homo sapiens</i> | Europe / Switzerland                                | 2020-03-01 | Hôpitaux universitaires de Genève Laboratoire de Virologie                                                                                                                                                                     | Hôpitaux universitaires de Genève Laboratoire de Virologie                                                                                                                                                                     | Laubscher F.                                                                                                                                                                                                                                  |
| 318 | EPI_ISL_415704 | hCoV-19/Switzerland/BE2536/2020  | <i>Homo sapiens</i> | Europe / Switzerland                                | 2020-03-04 | Hôpitaux universitaires de Genève Laboratoire de Virologie                                                                                                                                                                     | Hôpitaux universitaires de Genève Laboratoire de Virologie                                                                                                                                                                     | Laubscher F.                                                                                                                                                                                                                                  |
| 318 | EPI_ISL_415705 | hCoV-19/Switzerland/GE4135/2020  | <i>Homo sapiens</i> | Europe / Switzerland                                | 2020-03-06 | Hôpitaux universitaires de Genève Laboratoire de Virologie                                                                                                                                                                     | Hôpitaux universitaires de Genève Laboratoire de Virologie                                                                                                                                                                     | Laubscher F.                                                                                                                                                                                                                                  |
| 318 | EPI_ISL_415706 | hCoV-19/Switzerland/GE06207/2020 | <i>Homo sapiens</i> | Europe / Switzerland                                | 2020-03-06 | Hôpitaux universitaires de Genève Laboratoire de Virologie                                                                                                                                                                     | Hôpitaux universitaires de Genève Laboratoire de Virologie                                                                                                                                                                     | Laubscher F.                                                                                                                                                                                                                                  |
| 318 | EPI_ISL_415707 | hCoV-19/Switzerland/GE6679/2020  | <i>Homo sapiens</i> | Europe / Switzerland                                | 2020-03-08 | Hôpitaux universitaires de Genève Laboratoire de Virologie                                                                                                                                                                     | Hôpitaux universitaires de Genève Laboratoire de Virologie                                                                                                                                                                     | Laubscher F.                                                                                                                                                                                                                                  |
| 318 | EPI_ISL_416493 | hCoV-19/France/HF2196/2020       | <i>Homo sapiens</i> | Europe / France / Hauts de France / Château-Thierry | 2020-03-08 | CH Jean de Navarre Laboratoire de Biologie                                                                                                                                                                                     | National Reference Center for Viruses of Respiratory Infections, Institut Pasteur, Paris                                                                                                                                       | Mélnie Albert, Marion Barbet, Sylvie Behillil, Méline Bizard, Angela Brisebarre, Flora Donati, Etienne Simon-Lorière, Vincent Enouf, Maud Vanpeene, Sylvie van der Werf                                                                       |
| 319 | EPI_ISL_415708 | hCoV-19/Switzerland/GE4984/2020  | <i>Homo sapiens</i> | Europe / Switzerland                                | 2020-03-07 | Hôpitaux universitaires de Genève Laboratoire de Virologie                                                                                                                                                                     | Hôpitaux universitaires de Genève Laboratoire de Virologie                                                                                                                                                                     | Laubscher F.                                                                                                                                                                                                                                  |
| 320 | EPI_ISL_415709 | hCoV-19/Hangzhou/ZJU-01/2020     | <i>Homo sapiens</i> | Asia / China / Hangzhou                             | 2020-01-25 | State Key Laboratory for Diagnosis and Treatment of Infectious Diseases, National Clinical Research Center for Infectious Diseases, First Affiliated Hospital, Zhejiang University School of Medicine, Hangzhou, China. 310003 | State Key Laboratory for Diagnosis and Treatment of Infectious Diseases, National Clinical Research Center for Infectious Diseases, First Affiliated Hospital, Zhejiang University School of Medicine, Hangzhou, China. 310003 | Hangping Yao, Nanping Wu, Chao Jiang, Xiangyun Lu, Linfang Cheng, Fumin Liu, Zhigang Wu, Haibo Wu, Changzhong Jin, Min Zheng, Lanjuan Li                                                                                                      |
| 321 | EPI_ISL_415741 | hCoV-19/Taiwan/CGMH-CGU-03/2020  | <i>Homo sapiens</i> | Asia / Taiwan / Taoyuan                             | 2020-02-26 | Laboratory Medicine                                                                                                                                                                                                            | Department of Laboratory Medicine, Lin-Kou Chang Gung Memorial Hospital, Taoyuan, Taiwan                                                                                                                                       | Kuo-Chien Tsao, Yu-Nong Gong, Shu-Li Yang, Yi-Chun Liu, Chung-Guei Huang, Po-Wei Huang, Mei-Jen Hsiao, Cheng-Ta Yang, Cheng-Hsun Chiu, Chi-Hsien Huang, Kuang-Tso Le, Shu-Min Lin, Peng-Nien Huang, Kuo-Ming Lee, Guang-Wu Chen, Shin-Ru Shih |

|     |                |                                 |                     |                                                      |            |                                                                                                                                                                                                                               |                                                                                                                                                                                                                               |                                                                                                                                                                                                                                                                                                             |
|-----|----------------|---------------------------------|---------------------|------------------------------------------------------|------------|-------------------------------------------------------------------------------------------------------------------------------------------------------------------------------------------------------------------------------|-------------------------------------------------------------------------------------------------------------------------------------------------------------------------------------------------------------------------------|-------------------------------------------------------------------------------------------------------------------------------------------------------------------------------------------------------------------------------------------------------------------------------------------------------------|
| 321 | EPI_ISL_415743 | hCoV-19/Taiwan/CGMH-CGU-05/2020 | <i>Homo sapiens</i> | Asia / Taiwan / Taoyuan                              | 2020-02-27 | Laboratory Medicine                                                                                                                                                                                                           | Department of Laboratory Medicine, Lin-Kou Chang Gung Memorial Hospital, Taoyuan, Taiwan                                                                                                                                      | Kuo-Chien Tsao, Yu-Nong Gong, Shu-Li Yang, Yi-Chun Liu, Chung-Guei Huang, Po-Wei Huang, Mei-Jen Hsiao, Cheng-Ta Yang, Cheng-Hsun Chiu, Chi-Hsien Huang, Kuang-Tso Le, Shu-Min Lin, Peng-Nien Huang, Kuo-Ming Lee, Guang-Wu Chen, Shin-Ru Shih                                                               |
| 322 | EPI_ISL_415787 | hCoV-19/Peru/010/2020           | <i>Homo sapiens</i> | South America / Peru / Lima                          | 2020-03-10 | Laboratorio de Referencia Nacional de Virus Respiratorio. Instituto Nacional de Salud. Peru                                                                                                                                   | Laboratorio de Referencia Nacional de Biotecnología y Biología Molecular. Instituto Nacional de Salud. Peru                                                                                                                   | Carlos Padilla Rojas, Priscila Lope Pari, Karolyn Vega Chozo, Johanna Balbuena Torres, Omar Caceres Rey, Hemri Bailon Calderon, Maribel Huaranga Nuñez, Nancy Rojas Serrano                                                                                                                                 |
| 323 | EPI_ISL_415920 | hCoV-19/Wales/PHW32/2020        | <i>Homo sapiens</i> | Europe / United Kingdom / Wales                      | 2020-03-12 | Wales Specialist Virology Centre                                                                                                                                                                                              | Public Health Wales Microbiology Cardiff                                                                                                                                                                                      | Catherine Moore, Joanne Watkins, Sally Corden, Tom Connor                                                                                                                                                                                                                                                   |
| 324 | EPI_ISL_416024 | hCoV-19/Wales/PHW35/2020        | <i>Homo sapiens</i> | Europe / United Kingdom / Wales                      | 2020-03-11 | Wales Specialist Virology Centre                                                                                                                                                                                              | Public Health Wales Microbiology Cardiff                                                                                                                                                                                      | Catherine Moore, Joanne Watkins, Sally Corden, Tom Connor                                                                                                                                                                                                                                                   |
| 325 | EPI_ISL_416029 | hCoV-19/Brazil/SPBR-08/2020     | <i>Homo sapiens</i> | South America / Brazil / Sao Paulo / Sao Paulo       | 2020-03-04 | Laboratório Fleury                                                                                                                                                                                                            | Instituto Adolfo Lutz, Interdisciplinary Procedures Center, Strategic Laboratory                                                                                                                                              | Claudio Tavares Sacchi, Claudia Regina Gonçalves, Carlos Henrique Camargo, Fabiana Cristina Pereira dos Santos, Daniela Bernardes Borges da Silva, Simone Guadagnucci Morillo, Adriano Abbud, Adriana Bugno, Maria do Carmo Sampaio Tavares Timenetsky, Terezinha Maria de Paiva                            |
| 326 | EPI_ISL_416032 | hCoV-19/Brazil/SPBR-10/2020     | <i>Homo sapiens</i> | South America / Brazil / Distrito Federal / Brasilia | 2020-03-04 | National Influenza Center - Instituto Adolfo Lutz                                                                                                                                                                             | Instituto Adolfo Lutz, Interdisciplinary Procedures Center, Strategic Laboratory                                                                                                                                              | Claudio Tavares Sacchi, Claudia Regina Gonçalves, Carlos Henrique Camargo, Fabiana Cristina Pereira dos Santos, Daniela Bernardes Borges da Silva, Simone Guadagnucci Morillo, Adriano Abbud, Adriana Bugno, Maria do Carmo Sampaio Tavares Timenetsky, Terezinha Maria de Paiva                            |
| 327 | EPI_ISL_416033 | hCoV-19/Brazil/SPBR-11/2020     | <i>Homo sapiens</i> | South America / Brazil / Sao Paulo / Sao Paulo       | 2020-03-03 | Hospital Israelita Albert Einstein                                                                                                                                                                                            | Instituto Adolfo Lutz, Interdisciplinary Procedures Center, Strategic Laboratory                                                                                                                                              | Claudio Tavares Sacchi, Claudia Regina Gonçalves, Carlos Henrique Camargo, Erica Valessa Ramos Gomes, Fabiana Cristina Pereira dos Santos, Daniela Bernardes Borges da Silva, Simone Guadagnucci Morillo, Adriano Abbud, Adriana Bugno, Maria do Carmo Sampaio Tavares Timenetsky, Terezinha Maria de Paiva |
| 328 | EPI_ISL_416034 | hCoV-19/Brazil/SPBR-12/2020     | <i>Homo sapiens</i> | South America / Brazil / Sao Paulo / Sao Paulo       | 2020-03-04 | Hospital Israelita Albert Einstein                                                                                                                                                                                            | Instituto Adolfo Lutz, Interdisciplinary Procedures Center, Strategic Laboratory                                                                                                                                              | Claudio Tavares Sacchi, Claudia Regina Gonçalves, Carlos Henrique Camargo, Erica Valessa Ramos Gomes, Fabiana Cristina Pereira dos Santos, Daniela Bernardes Borges da Silva, Simone Guadagnucci Morillo, Adriano Abbud, Adriana Bugno, Maria do Carmo Sampaio Tavares Timenetsky, Terezinha Maria de Paiva |
| 329 | EPI_ISL_416036 | hCoV-19/Brazil/SPBR-14/2020     | <i>Homo sapiens</i> | South America / Brazil / Sao Paulo / Sao Paulo       | 2020-03-05 | National Influenza Center - Instituto Adolfo Lutz                                                                                                                                                                             | Instituto Adolfo Lutz, Interdisciplinary Procedures Center, Strategic Laboratory                                                                                                                                              | Claudio Tavares Sacchi, Claudia Regina Gonçalves, Carlos Henrique Camargo, Erica Valessa Ramos Gomes, Fabiana Cristina Pereira dos Santos, Daniela Bernardes Borges da Silva, Simone Guadagnucci Morillo, Adriano Abbud, Adriana Bugno, Maria do Carmo Sampaio Tavares Timenetsky, Terezinha Maria de Paiva |
| 330 | EPI_ISL_416044 | hCoV-19/Hangzhou/ZJU-03/2020    | <i>Homo sapiens</i> | Asia / China / Hangzhou                              | 2020-01-25 | State Key Laboratory for Diagnosis and Treatment of Infectious Diseases, National Clinical Research Center for Infectious Diseases, First Affiliated Hospital, Zhejiang University School of Medicine, Hangzhou, China 310003 | State Key Laboratory for Diagnosis and Treatment of Infectious Diseases, National Clinical Research Center for Infectious Diseases, First Affiliated Hospital, Zhejiang University School of Medicine, Hangzhou, China 310003 | Hangping Yao, Nanping Wu, Chao Jiang, Xiangyun Lu, Linfang Cheng, Fumin Liu, Zhigang Wu, Haibo Wu, Changzhong Jin, Min Zheng, Lanjuan Li                                                                                                                                                                    |

|     |                |                              |                     |                               |            |                                                                                                                                                                                                                               |                                                                                                                                                                                                                               |                                                                                                                                          |
|-----|----------------|------------------------------|---------------------|-------------------------------|------------|-------------------------------------------------------------------------------------------------------------------------------------------------------------------------------------------------------------------------------|-------------------------------------------------------------------------------------------------------------------------------------------------------------------------------------------------------------------------------|------------------------------------------------------------------------------------------------------------------------------------------|
| 331 | EPI_ISL_416047 | hCoV-19/Hangzhou/ZJU-06/2020 | <i>Homo sapiens</i> | Asia / China / Hangzhou       | 2020-02-02 | State Key Laboratory for Diagnosis and Treatment of Infectious Diseases, National Clinical Research Center for Infectious Diseases, First Affiliated Hospital, Zhejiang University School of Medicine, Hangzhou, China 310003 | State Key Laboratory for Diagnosis and Treatment of Infectious Diseases, National Clinical Research Center for Infectious Diseases, First Affiliated Hospital, Zhejiang University School of Medicine, Hangzhou, China 310003 | Hangping Yao, Nanping Wu, Chao Jiang, Xiangyun Lu, Linfang Cheng, Fumin Liu, Zhigang Wu, Haibo Wu, Changzhong Jin, Min Zheng, Lanjuan Li |
| 332 | EPI_ISL_416140 | hCoV-19/Denmark/SSI-05/2020  | <i>Homo sapiens</i> | Europe / Denmark / Copenhagen | 2020-03-02 | Department of Virus and Microbiological Special diagnostics, Statens Serum Institut, Copenhagen, Denmark.                                                                                                                     | Statens Serum Institute                                                                                                                                                                                                       | Morten Rasmussen, Maiken Worsoe Rosenstjerne , Anders Fomsgaard                                                                          |
| 333 | EPI_ISL_416141 | hCoV-19/Denmark/SSI-09/2020  | <i>Homo sapiens</i> | Europe / Denmark / Copenhagen | 2020-03-03 | Department of Virus and Microbiological Special diagnostics, Statens Serum Institut, Copenhagen, Denmark.                                                                                                                     | Statens Serum Institute                                                                                                                                                                                                       | Morten Rasmussen, Maiken Worsoe Rosenstjerne , Anders Fomsgaard                                                                          |
| 334 | EPI_ISL_416142 | hCoV-19/Denmark/SSI-01/2020  | <i>Homo sapiens</i> | Europe / Denmark / Copenhagen | 2020-02-26 | Department of Virus and Microbiological Special diagnostics, Statens Serum Institut, Copenhagen, Denmark.                                                                                                                     | Statens Serum Institute                                                                                                                                                                                                       | Morten Rasmussen, Maiken Worsoe Rosenstjerne , Anders Fomsgaard                                                                          |
| 335 | EPI_ISL_416143 | hCoV-19/Denmark/SSI-02/2020  | <i>Homo sapiens</i> | Europe / Denmark / Copenhagen | 2020-02-28 | Department of Virus and Microbiological Special diagnostics, Statens Serum Institut, Copenhagen, Denmark.                                                                                                                     | ViFU                                                                                                                                                                                                                          | Morten Rasmussen, Maiken Worsoe Rosenstjerne , Anders Fomsgaard                                                                          |
| 336 | EPI_ISL_416144 | hCoV-19/Denmark/SSI-03/2020  | <i>Homo sapiens</i> | Europe / Denmark / Copenhagen | 2020-03-01 | Department of Virus and Microbiological Special diagnostics, Statens Serum Institut, Copenhagen, Denmark.                                                                                                                     | ViFU                                                                                                                                                                                                                          | Morten Rasmussen, Maiken Worsoe Rosenstjerne , Anders Fomsgaard                                                                          |
| 337 | EPI_ISL_416153 | hCoV-19/Denmark/SSI-04/2020  | <i>Homo sapiens</i> | Europe / Denmark / Copenhagen | 2020-03-02 | Department of Virus and Microbiological Special diagnostics, Statens Serum Institut, Copenhagen, Denmark.                                                                                                                     | ViFU                                                                                                                                                                                                                          | Morten Rasmussen, Maiken Worsoe Rosenstjerne , Anders Fomsgaard                                                                          |
| 338 | EPI_ISL_416316 | hCoV-19/Shanghai/SH0002/2020 | <i>Homo sapiens</i> | Asia / China / Shanghai       | 2020-01-25 | Shanghai Public Health Clinical Center, Shanghai Medical College, Fudan University                                                                                                                                            | National Research Center for Translational Medicine (Shanghai), Ruijin Hospital affiliated to Shanghai Jiao Tong University School of Medicine & Shanghai Public Health Clinical Center                                       | Shengyue Wang, Xiaonan Zhang, Gang Lu, Yun Tan, Yun Ling, Hongzhou Lu, Saijuan Chen                                                      |
| 339 | EPI_ISL_416317 | hCoV-19/Shanghai/SH0003/2020 | <i>Homo sapiens</i> | Asia / China / Shanghai       | 2020-01-25 | Shanghai Public Health Clinical Center, Shanghai Medical College, Fudan University                                                                                                                                            | National Research Center for Translational Medicine (Shanghai), Ruijin Hospital affiliated to Shanghai Jiao Tong University School of Medicine & Shanghai Public Health Clinical Center                                       | Shengyue Wang, Xiaonan Zhang, Gang Lu, Yun Tan, Yun Ling, Hongzhou Lu, Saijuan Chen                                                      |
| 340 | EPI_ISL_416318 | hCoV-19/Shanghai/SH0004/2020 | <i>Homo sapiens</i> | Asia / China / Shanghai       | 2020-01-28 | Shanghai Public Health Clinical Center, Shanghai Medical College, Fudan University                                                                                                                                            | National Research Center for Translational Medicine (Shanghai), Ruijin Hospital affiliated to Shanghai Jiao Tong University School of Medicine & Shanghai Public Health Clinical Center                                       | Shengyue Wang, Xiaonan Zhang, Gang Lu, Yun Tan, Yun Ling, Hongzhou Lu, Saijuan Chen                                                      |







|     |                |                              |                     |                                            |            |                                                                                                                                                                                                                               |                                                                                                                                                                                                                               |                                                                                                                                          |
|-----|----------------|------------------------------|---------------------|--------------------------------------------|------------|-------------------------------------------------------------------------------------------------------------------------------------------------------------------------------------------------------------------------------|-------------------------------------------------------------------------------------------------------------------------------------------------------------------------------------------------------------------------------|------------------------------------------------------------------------------------------------------------------------------------------|
| 368 | EPI_ISL_416401 | hCoV-19/Shanghai/SH0114/2020 | <i>Homo sapiens</i> | Asia / China / Shanghai                    | 2020-02-02 | Shanghai Public Health Clinical Center, Shanghai Medical College, Fudan University                                                                                                                                            | National Research Center for Translational Medicine (Shanghai), Ruijin Hospital affiliated to Shanghai Jiao Tong University School of Medicine & Shanghai Public Health Clinical Center                                       | Shengyue Wang, Xiaonan Zhang, Gang Lu, Yun Tan, Yun Ling, Hongzhou Lu, Saijuan Chen                                                      |
| 369 | EPI_ISL_416402 | hCoV-19/Shanghai/SH0115/2020 | <i>Homo sapiens</i> | Asia / China / Shanghai                    | 2020-02-11 | Shanghai Public Health Clinical Center, Shanghai Medical College, Fudan University                                                                                                                                            | National Research Center for Translational Medicine (Shanghai), Ruijin Hospital affiliated to Shanghai Jiao Tong University School of Medicine & Shanghai Public Health Clinical Center                                       | Shengyue Wang, Xiaonan Zhang, Gang Lu, Yun Tan, Yun Ling, Hongzhou Lu, Saijuan Chen                                                      |
| 370 | EPI_ISL_416403 | hCoV-19/Shanghai/SH0117/2020 | <i>Homo sapiens</i> | Asia / China / Shanghai                    | 2020-02-02 | Shanghai Public Health Clinical Center, Shanghai Medical College, Fudan University                                                                                                                                            | National Research Center for Translational Medicine (Shanghai), Ruijin Hospital affiliated to Shanghai Jiao Tong University School of Medicine & Shanghai Public Health Clinical Center                                       | Shengyue Wang, Xiaonan Zhang, Gang Lu, Yun Tan, Yun Ling, Hongzhou Lu, Saijuan Chen                                                      |
| 371 | EPI_ISL_416405 | hCoV-19/Shanghai/SH0121/2020 | <i>Homo sapiens</i> | Asia / China / Shanghai                    | 2020-02-02 | Shanghai Public Health Clinical Center, Shanghai Medical College, Fudan University                                                                                                                                            | National Research Center for Translational Medicine (Shanghai), Ruijin Hospital affiliated to Shanghai Jiao Tong University School of Medicine & Shanghai Public Health Clinical Center                                       | Shengyue Wang, Xiaonan Zhang, Gang Lu, Yun Tan, Yun Ling, Hongzhou Lu, Saijuan Chen                                                      |
| 372 | EPI_ISL_416407 | hCoV-19/Shanghai/SH0126/2020 | <i>Homo sapiens</i> | Asia / China / Shanghai                    | 2020-02-15 | Shanghai Public Health Clinical Center, Shanghai Medical College, Fudan University                                                                                                                                            | National Research Center for Translational Medicine (Shanghai), Ruijin Hospital affiliated to Shanghai Jiao Tong University School of Medicine & Shanghai Public Health Clinical Center                                       | Shengyue Wang, Xiaonan Zhang, Gang Lu, Yun Tan, Yun Ling, Hongzhou Lu, Saijuan Chen                                                      |
| 373 | EPI_ISL_416409 | hCoV-19/Shanghai/SH0128/2020 | <i>Homo sapiens</i> | Asia / China / Shanghai                    | 2020-02-02 | Shanghai Public Health Clinical Center, Shanghai Medical College, Fudan University                                                                                                                                            | National Research Center for Translational Medicine (Shanghai), Ruijin Hospital affiliated to Shanghai Jiao Tong University School of Medicine & Shanghai Public Health Clinical Center                                       | Shengyue Wang, Xiaonan Zhang, Gang Lu, Yun Tan, Yun Ling, Hongzhou Lu, Saijuan Chen                                                      |
| 374 | EPI_ISL_416411 | hCoV-19/Australia/VIC03/2020 | <i>Homo sapiens</i> | Oceania / Australia / Victoria / Melbourne | 2020-01-25 | Victorian Infectious Diseases Reference Laboratory (VIDRL)                                                                                                                                                                    | Victorian Infectious Diseases Reference Laboratory and Microbiological Diagnostic Unit Public Health Laboratory, Doherty Institute                                                                                            | Caly L., Seemann T., Schultz M., Druce J., Tairaoa, G.                                                                                   |
| 375 | EPI_ISL_416412 | hCoV-19/Australia/VIC04/2020 | <i>Homo sapiens</i> | Oceania / Australia / Victoria / Melbourne | 2020-03-02 | Victorian Infectious Diseases Reference Laboratory (VIDRL)                                                                                                                                                                    | Victorian Infectious Diseases Reference Laboratory and Microbiological Diagnostic Unit Public Health Laboratory, Doherty Institute                                                                                            | Caly L., Seemann T., Schultz M., Druce J., Tairaoa, G.                                                                                   |
| 376 | EPI_ISL_416415 | hCoV-19/Australia/VIC07/2020 | <i>Homo sapiens</i> | Oceania / Australia / Victoria / Melbourne | 2020-02-08 | Victorian Infectious Diseases Reference Laboratory (VIDRL)                                                                                                                                                                    | Victorian Infectious Diseases Reference Laboratory and Microbiological Diagnostic Unit Public Health Laboratory, Doherty Institute                                                                                            | Caly L., Seemann T., Schultz M., Druce J., Tairaoa, G.                                                                                   |
| 377 | EPI_ISL_416425 | hCoV-19/Hangzhou/ZJU-07/2020 | <i>Homo sapiens</i> | Asia / China / Hangzhou                    | 2020-02-03 | State Key Laboratory for Diagnosis and Treatment of Infectious Diseases, National Clinical Research Center for Infectious Diseases, First Affiliated Hospital, Zhejiang University School of Medicine, Hangzhou, China 310003 | State Key Laboratory for Diagnosis and Treatment of Infectious Diseases, National Clinical Research Center for Infectious Diseases, First Affiliated Hospital, Zhejiang University School of Medicine, Hangzhou, China 310003 | Hangping Yao, Nanping Wu, Chao Jiang, Xiangyun Lu, Linfang Cheng, Fumin Liu, Zhigang Wu, Haibo Wu, Changzhong Jin, Min Zheng, Lanjuan Li |
| 378 | EPI_ISL_416426 | hCoV-19/Hungary/mb11/2020    | <i>Homo sapiens</i> | Europe / Hungary / Budapest                | 2020-03-17 | Virological Research Group, Szentágotthai Research Centre, University of Pécs                                                                                                                                                 | Bioinformatics Research Group, Szentágotthai Research Centre, University of Pécs                                                                                                                                              | Péter Urbán, Endre Gábor Tóth, Gábor Kemenesi, Róbert Herczeg, Attila Gyenesei, Ferenc Jakab                                             |

|     |                |                                            |                     |                                  |            |                                                                                  |                                                                                                      |                                                                                                                                                                                                                                                                                                     |
|-----|----------------|--------------------------------------------|---------------------|----------------------------------|------------|----------------------------------------------------------------------------------|------------------------------------------------------------------------------------------------------|-----------------------------------------------------------------------------------------------------------------------------------------------------------------------------------------------------------------------------------------------------------------------------------------------------|
| 379 | EPI_ISL_416429 | hCoV-19/Vietnam/CM99/2020                  | <i>Homo sapiens</i> | Asia / Vietnam / Vinhphuc        | 2020-02-11 | National Influenza Center, National Institute of Hygiene and Epidemiology (NIHE) | National Influenza Center, National Institute of Hygiene and Epidemiology (NIHE)                     | Le Quynh Mai, Taichiro Takemura, Meng Ling Moi, Takeshi Nabeshima, Nguyen Le Khanh Hang, Hoang Vu Mai Phuong, Ung Thi Hong Trang, Le Thi Thanh, Nguyen Vu Son, Vuong Duc Cuong, Pham Thi Hien, Tran Thu Huong, Nguyen Phuong Anh, Pham Hong Quynh Anh, Kouichi Morita, Futoshi Hasebe, Dang Duc Anh |
| 380 | EPI_ISL_416432 | hCoV-19/Saudi Arabia/KAIMRC-Alghoribi/2020 | <i>Homo sapiens</i> | Asia / Saudi Arabia / Riyadh     | 2020-03-07 | Clinical Microbiology Lab                                                        | Infectious Disease Research Department, King Abdullah International Medical Research Center (KAIMRC) | Majed Alghoribi, Sadeem Alhayli, Abdulrahman Alswaji, Liliane Okdah, Sameera Al Johani, Michel Doumith                                                                                                                                                                                              |
| 381 | EPI_ISL_416433 | hCoV-19/USA/WA-UW77/2020                   | <i>Homo sapiens</i> | North America / USA / Washington | 2020-03-10 | UW Virology Lab                                                                  | UW Virology Lab                                                                                      | Pavitra Roychoudhury, Hong Xie, Keith Jerome, Alexander Greninger                                                                                                                                                                                                                                   |
| 382 | EPI_ISL_416434 | hCoV-19/USA/WA-UW78/2020                   | <i>Homo sapiens</i> | North America / USA / Washington | 2020-03-10 | UW Virology Lab                                                                  | UW Virology Lab                                                                                      | Pavitra Roychoudhury, Hong Xie, Keith Jerome, Alexander Greninger                                                                                                                                                                                                                                   |
| 383 | EPI_ISL_416435 | hCoV-19/USA/WA-UW79/2020                   | <i>Homo sapiens</i> | North America / USA / Washington | 2020-03-10 | UW Virology Lab                                                                  | UW Virology Lab                                                                                      | Pavitra Roychoudhury, Hong Xie, Keith Jerome, Alexander Greninger                                                                                                                                                                                                                                   |
| 384 | EPI_ISL_416436 | hCoV-19/USA/WA-UW80/2020                   | <i>Homo sapiens</i> | North America / USA / Washington | 2020-03-10 | UW Virology Lab                                                                  | UW Virology Lab                                                                                      | Pavitra Roychoudhury, Hong Xie, Keith Jerome, Alexander Greninger                                                                                                                                                                                                                                   |
| 385 | EPI_ISL_416438 | hCoV-19/USA/WA-UW82/2020                   | <i>Homo sapiens</i> | North America / USA / Washington | 2020-03-10 | UW Virology Lab                                                                  | UW Virology Lab                                                                                      | Pavitra Roychoudhury, Hong Xie, Keith Jerome, Alexander Greninger                                                                                                                                                                                                                                   |
| 386 | EPI_ISL_416439 | hCoV-19/USA/WA-UW83/2020                   | <i>Homo sapiens</i> | North America / USA / Washington | 2020-03-10 | UW Virology Lab                                                                  | UW Virology Lab                                                                                      | Pavitra Roychoudhury, Hong Xie, Keith Jerome, Alexander Greninger                                                                                                                                                                                                                                   |
| 387 | EPI_ISL_416441 | hCoV-19/USA/WA-UW85/2020                   | <i>Homo sapiens</i> | North America / USA / Washington | 2020-03-10 | UW Virology Lab                                                                  | UW Virology Lab                                                                                      | Pavitra Roychoudhury, Hong Xie, Keith Jerome, Alexander Greninger                                                                                                                                                                                                                                   |
| 388 | EPI_ISL_416442 | hCoV-19/USA/WA-UW86/2020                   | <i>Homo sapiens</i> | North America / USA / Washington | 2020-03-10 | UW Virology Lab                                                                  | UW Virology Lab                                                                                      | Pavitra Roychoudhury, Hong Xie, Keith Jerome, Alexander Greninger                                                                                                                                                                                                                                   |
| 389 | EPI_ISL_416443 | hCoV-19/USA/WA-UW87/2020                   | <i>Homo sapiens</i> | North America / USA / Washington | 2020-03-10 | UW Virology Lab                                                                  | UW Virology Lab                                                                                      | Pavitra Roychoudhury, Hong Xie, Keith Jerome, Alexander Greninger                                                                                                                                                                                                                                   |
| 390 | EPI_ISL_416444 | hCoV-19/USA/WA-UW88/2020                   | <i>Homo sapiens</i> | North America / USA / Washington | 2020-03-10 | UW Virology Lab                                                                  | UW Virology Lab                                                                                      | Pavitra Roychoudhury, Hong Xie, Keith Jerome, Alexander Greninger                                                                                                                                                                                                                                   |
| 391 | EPI_ISL_416445 | hCoV-19/USA/WA-UW89/2020                   | <i>Homo sapiens</i> | North America / USA / Washington | 2020-03-10 | UW Virology Lab                                                                  | UW Virology Lab                                                                                      | Pavitra Roychoudhury, Hong Xie, Keith Jerome, Alexander Greninger                                                                                                                                                                                                                                   |
| 392 | EPI_ISL_416447 | hCoV-19/USA/WA-UW91/2020                   | <i>Homo sapiens</i> | North America / USA / Washington | 2020-03-10 | UW Virology Lab                                                                  | UW Virology Lab                                                                                      | Pavitra Roychoudhury, Hong Xie, Keith Jerome, Alexander Greninger                                                                                                                                                                                                                                   |
| 393 | EPI_ISL_416448 | hCoV-19/USA/WA-UW92/2020                   | <i>Homo sapiens</i> | North America / USA / Washington | 2020-03-11 | UW Virology Lab                                                                  | UW Virology Lab                                                                                      | Pavitra Roychoudhury, Hong Xie, Keith Jerome, Alexander Greninger                                                                                                                                                                                                                                   |
| 394 | EPI_ISL_416451 | hCoV-19/USA/WA-UW95/2020                   | <i>Homo sapiens</i> | North America / USA / Washington | 2020-03-10 | UW Virology Lab                                                                  | UW Virology Lab                                                                                      | Pavitra Roychoudhury, Hong Xie, Keith Jerome, Alexander Greninger                                                                                                                                                                                                                                   |
| 395 | EPI_ISL_416452 | hCoV-19/USA/WA-UW96/2020                   | <i>Homo sapiens</i> | North America / USA / Washington | 2020-03-10 | UW Virology Lab                                                                  | UW Virology Lab                                                                                      | Pavitra Roychoudhury, Hong Xie, Keith Jerome, Alexander Greninger                                                                                                                                                                                                                                   |



|     |                |                                |                     |                                                     |            |                                                                                                                                                                                                                               |                                                                                                                                                                                                                               |                                                                                                                                                                                                                                                                                                                                                                                                                                                                                                                                                                    |
|-----|----------------|--------------------------------|---------------------|-----------------------------------------------------|------------|-------------------------------------------------------------------------------------------------------------------------------------------------------------------------------------------------------------------------------|-------------------------------------------------------------------------------------------------------------------------------------------------------------------------------------------------------------------------------|--------------------------------------------------------------------------------------------------------------------------------------------------------------------------------------------------------------------------------------------------------------------------------------------------------------------------------------------------------------------------------------------------------------------------------------------------------------------------------------------------------------------------------------------------------------------|
| 396 | EPI_ISL_416457 | hCoV-19/USA/CA-MG0987/2020     | <i>Homo sapiens</i> | North America / USA / California / San Diego County | 2020-03-18 | Andersen Lab, The Scripps Research Institute                                                                                                                                                                                  | Andersen Lab, The Scripps Research Institute                                                                                                                                                                                  | Mark Zeller, Catie Anderson, Emily Spender, Sarah Topol, Raphaelle Klitting, Refugio Robles-Sikisaka, Karthik Gangavarapu, Laura Nicholson, Kristian Andersen                                                                                                                                                                                                                                                                                                                                                                                                      |
| 397 | EPI_ISL_416466 | hCoV-19/USA/WA-S11/2020        | <i>Homo sapiens</i> | North America / USA / Washington / King County      | 2020-03-03 | Seattle Flu Study                                                                                                                                                                                                             | Seattle Flu Study                                                                                                                                                                                                             | Chu et al                                                                                                                                                                                                                                                                                                                                                                                                                                                                                                                                                          |
| 398 | EPI_ISL_416467 | hCoV-19/Belgium/MTR-03021/2020 | <i>Homo sapiens</i> | Europe / Belgium / Holsbeek                         | 2020-03-02 | KU Leuven, Clinical and Epidemiological Virology                                                                                                                                                                              | KU Leuven, Clinical and Epidemiological Virology                                                                                                                                                                              | Bert Vanmechelen, Tony Wawina, Joan Marti-Carreras, Piet Maes                                                                                                                                                                                                                                                                                                                                                                                                                                                                                                      |
| 399 | EPI_ISL_416468 | hCoV-19/Belgium/GMH-03022/2020 | <i>Homo sapiens</i> | Europe / Belgium / Holsbeek                         | 2020-03-02 | KU Leuven, Clinical and Epidemiological Virology                                                                                                                                                                              | KU Leuven, Clinical and Epidemiological Virology                                                                                                                                                                              | Bert Vanmechelen, Tony Wawina, Joan Marti-Carreras, Piet Maes                                                                                                                                                                                                                                                                                                                                                                                                                                                                                                      |
| 400 | EPI_ISL_416469 | hCoV-19/Belgium/SN-03031/2020  | <i>Homo sapiens</i> | Europe / Belgium / Kessel-Lo                        | 2020-03-03 | KU Leuven, Clinical and Epidemiological Virology                                                                                                                                                                              | KU Leuven, Clinical and Epidemiological Virology                                                                                                                                                                              | Bert Vanmechelen, Tony Wawina, Joan Marti-Carreras, Piet Maes                                                                                                                                                                                                                                                                                                                                                                                                                                                                                                      |
| 401 | EPI_ISL_416470 | hCoV-19/Belgium/DB-03023/2020  | <i>Homo sapiens</i> | Europe / Belgium / Couthuin                         | 2020-03-02 | KU Leuven, Clinical and Epidemiological Virology                                                                                                                                                                              | KU Leuven, Clinical and Epidemiological Virology                                                                                                                                                                              | Bert Vanmechelen, Tony Wawina, Joan Marti-Carreras, Piet Maes                                                                                                                                                                                                                                                                                                                                                                                                                                                                                                      |
| 402 | EPI_ISL_416471 | hCoV-19/Belgium/DBD-03024/2020 | <i>Homo sapiens</i> | Europe / Belgium / Kessel-Lo                        | 2020-03-02 | KU Leuven, Clinical and Epidemiological Virology                                                                                                                                                                              | KU Leuven, Clinical and Epidemiological Virology                                                                                                                                                                              | Bert Vanmechelen, Tony Wawina, Joan Marti-Carreras, Piet Maes                                                                                                                                                                                                                                                                                                                                                                                                                                                                                                      |
| 403 | EPI_ISL_416472 | hCoV-19/Belgium/UMF-03025/2020 | <i>Homo sapiens</i> | Europe / Belgium / Kessel-Lo                        | 2020-03-02 | KU Leuven, Clinical and Epidemiological Virology                                                                                                                                                                              | KU Leuven, Clinical and Epidemiological Virology                                                                                                                                                                              | Bert Vanmechelen, Tony Wawina, Joan Marti-Carreras, Piet Maes                                                                                                                                                                                                                                                                                                                                                                                                                                                                                                      |
| 404 | EPI_ISL_416473 | hCoV-19/Hangzhou/ZJU-08/2020   | <i>Homo sapiens</i> | Asia / China / Hangzhou                             | 2020-01-26 | State Key Laboratory for Diagnosis and Treatment of Infectious Diseases, National Clinical Research Center for Infectious Diseases, First Affiliated Hospital, Zhejiang University School of Medicine, Hangzhou, China 310003 | State Key Laboratory for Diagnosis and Treatment of Infectious Diseases, National Clinical Research Center for Infectious Diseases, First Affiliated Hospital, Zhejiang University School of Medicine, Hangzhou, China 310003 | Hangping Yao, Nanping Wu, Chao Jiang, Xiangyun Lu, Linfang Cheng, Fumin Liu, Zhigang Wu, Haibo Wu, Changzhong Jin, Min Zheng, Lanjuan Li                                                                                                                                                                                                                                                                                                                                                                                                                           |
| 405 | EPI_ISL_416474 | hCoV-19/Hangzhou/ZJU-09/2020   | <i>Homo sapiens</i> | Asia / China / Hangzhou                             | 2020-01-28 | State Key Laboratory for Diagnosis and Treatment of Infectious Diseases, National Clinical Research Center for Infectious Diseases, First Affiliated Hospital, Zhejiang University School of Medicine, Hangzhou, China 310003 | State Key Laboratory for Diagnosis and Treatment of Infectious Diseases, National Clinical Research Center for Infectious Diseases, First Affiliated Hospital, Zhejiang University School of Medicine, Hangzhou, China 310003 | Hangping Yao, Nanping Wu, Chao Jiang, Xiangyun Lu, Linfang Cheng, Fumin Liu, Zhigang Wu, Haibo Wu, Changzhong Jin, Min Zheng, Lanjuan Li                                                                                                                                                                                                                                                                                                                                                                                                                           |
| 406 | EPI_ISL_416475 | hCoV-19/Belgium/DBA-03032/2020 | <i>Homo sapiens</i> | Europe / Belgium / Leuven                           | 2020-03-03 | KU Leuven, Clinical and Epidemiological Virology                                                                                                                                                                              | KU Leuven, Clinical and Epidemiological Virology                                                                                                                                                                              | Bert Vanmechelen, Tony Wawina, Joan Marti-Carreras, Piet Maes                                                                                                                                                                                                                                                                                                                                                                                                                                                                                                      |
| 407 | EPI_ISL_416476 | hCoV-19/Belgium/MTR-03026/2020 | <i>Homo sapiens</i> | Europe / Belgium / Holsbeek                         | 2020-03-02 | KU Leuven, Clinical and Epidemiological Virology                                                                                                                                                                              | KU Leuven, Clinical and Epidemiological Virology                                                                                                                                                                              | Bert Vanmechelen, Tony Wawina, Joan Marti-Carreras, Piet Maes                                                                                                                                                                                                                                                                                                                                                                                                                                                                                                      |
| 408 | EPI_ISL_416477 | hCoV-19/Georgia/Tb-390/2020    | <i>Homo sapiens</i> | Asia / Georgia / Tbilisi                            | 2020-03-08 | R. G. Lugar Center for Public Health Research, National Center for Disease Control and Public Health (NCDC) of Georgia.                                                                                                       | R. G. Lugar Center for Public Health Research, National Center for Disease Control and Public Health (NCDC) of Georgia.                                                                                                       | Marine Murtskhaladze, Nato Kotaria, Ann Machablishvili, Lela Sabadze, Mari Gavashelidze, Ana Papkiauri, Meri Pantsulaia, Gvantsa Brachveli, Tata Imnadze, Tamar Jashiashvili, Tea Tevdoradze, Ketevan Sidamonidze, Ekaterine Khmaladze, Ekaterine Zhghenti, Roena Sukhiashvili, Mariam Zakalashvili, Lela Urushadze, Magda Dgebuadze, Giorgi Tomashvili, Davit Tsaguria, Ekaterine Zangaladze, Nino Berishvili, Gvantsa Chanturia, Adam Kotorashvili, Maia Alkhashashvili, Irma Burjanadze, Anna Kasradze, Khatuna Zakhashvili, Paata Imnadze, Amiran Gamkrelidze. |

|     |                |                              |                     |                                            |            |                                                                                                                         |                                                                                                                         |                                                                                                                                                                                                                                                                                                                                                                                                                                                                                                                                                                   |
|-----|----------------|------------------------------|---------------------|--------------------------------------------|------------|-------------------------------------------------------------------------------------------------------------------------|-------------------------------------------------------------------------------------------------------------------------|-------------------------------------------------------------------------------------------------------------------------------------------------------------------------------------------------------------------------------------------------------------------------------------------------------------------------------------------------------------------------------------------------------------------------------------------------------------------------------------------------------------------------------------------------------------------|
| 409 | EPI_ISL_416478 | hCoV-19/Georgia/Tb-673/2020  | <i>Homo sapiens</i> | Asia / Georgia / Tbilisi                   | 2020-03-14 | R. G. Lugar Center for Public Health Research, National Center for Disease Control and Public Health (NCDC) of Georgia. | R. G. Lugar Center for Public Health Research, National Center for Disease Control and Public Health (NCDC) of Georgia. | Marine Murtskhvaladze, Nato Kotaria, Ann Machablishvili, Lela Sabadze, Mari Gavashelidze, Ana Papkauri, Meri Pantsulaia, Gvantsa Brachveli, Tata Imnadze, Tamar Jashiashvili, Tea Tevdoradze, Ketevan Sidamonidze, Ekaterine Khmaladze, Ekaterine Zhghenti, Roena Sukhiashvili, Mariam Zakalashvili, Lela Urushadze, Magda Dgebuadze, Giorgi Tomashvili, Davit Tsaguria, Ekaterine Zangaladze, Nino Berishvili, Gvantsa Chanturia, Adam Kotorashvili, Maia Alkhazashvili, Irma Burjanadze, Anna Kasradze, Khatuna Zakhashvili, Paata Imnadze, Amiran Gamkrelidze. |
| 410 | EPI_ISL_416479 | hCoV-19/Georgia/Tb-273/2020  | <i>Homo sapiens</i> | Asia / Georgia / Tbilisi                   | 2020-03-05 | R. G. Lugar Center for Public Health Research, National Center for Disease Control and Public Health (NCDC) of Georgia. | R. G. Lugar Center for Public Health Research, National Center for Disease Control and Public Health (NCDC) of Georgia. | Marine Murtskhvaladze, Nato Kotaria, Ann Machablishvili, Lela Sabadze, Mari Gavashelidze, Ana Papkauri, Meri Pantsulaia, Gvantsa Brachveli, Tata Imnadze, Tamar Jashiashvili, Tea Tevdoradze, Ketevan Sidamonidze, Ekaterine Khmaladze, Ekaterine Zhghenti, Roena Sukhiashvili, Mariam Zakalashvili, Lela Urushadze, Magda Dgebuadze, Giorgi Tomashvili, Davit Tsaguria, Ekaterine Zangaladze, Nino Berishvili, Gvantsa Chanturia, Adam Kotorashvili, Maia Alkhazashvili, Irma Burjanadze, Anna Kasradze, Khatuna Zakhashvili, Paata Imnadze, Amiran Gamkrelidze. |
| 411 | EPI_ISL_416480 | hCoV-19/Georgia/Tb-537/2020  | <i>Homo sapiens</i> | Asia / Georgia / Tbilisi                   | 2020-03-11 | R. G. Lugar Center for Public Health Research, National Center for Disease Control and Public Health (NCDC) of Georgia. | R. G. Lugar Center for Public Health Research, National Center for Disease Control and Public Health (NCDC) of Georgia. | Ann Machablishvili, Nato Kotaria, Marine Murtskhvaladze, Lela Sabadze, Mari Gavashelidze, Ana Papkauri, Meri Pantsulaia, Gvantsa Brachveli, Tata Imnadze, Tamar Jashiashvili, Tea Tevdoradze, Ketevan Sidamonidze, Ekaterine Khmaladze, Ekaterine Zhghenti, Roena Sukhiashvili, Mariam Zakalashvili, Lela Urushadze, Magda Dgebuadze, Giorgi Tomashvili, Davit Tsaguria, Ekaterine Zangaladze, Nino Berishvili, Gvantsa Chanturia, Adam Kotorashvili, Maia Alkhazashvili, Irma Burjanadze, Anna Kasradze, Khatuna Zakhashvili, Paata Imnadze, Amiran Gamkrelidze. |
| 412 | EPI_ISL_416481 | hCoV-19/Georgia/Tb-712/2020  | <i>Homo sapiens</i> | Asia / Georgia / Tbilisi                   | 2020-03-16 | R. G. Lugar Center for Public Health Research, National Center for Disease Control and Public Health (NCDC) of Georgia. | R. G. Lugar Center for Public Health Research, National Center for Disease Control and Public Health (NCDC) of Georgia. | Gvantsa Chanturia, Marine Murtskhvaladze, Nato Kotaria, Ann Machablishvili, Lela Sabadze, Mari Gavashelidze, Ana Papkauri, Meri Pantsulaia, Gvantsa Brachveli, Tata Imnadze, Tamar Jashiashvili, Tea Tevdoradze, Ketevan Sidamonidze, Ekaterine Khmaladze, Ekaterine Zhghenti, Roena Sukhiashvili, Mariam Zakalashvili, Lela Urushadze, Magda Dgebuadze, Giorgi Tomashvili, Davit Tsaguria, Ekaterine Zangaladze, Nino Berishvili, Adam Kotorashvili, Maia Alkhazashvili, Irma Burjanadze, Anna Kasradze, Khatuna Zakhashvili, Paata Imnadze, Amiran Gamkrelidze. |
| 413 | EPI_ISL_416482 | hCoV-19/Georgia/Tb/2020      | <i>Homo sapiens</i> | Asia / Georgia / Tbilisi                   | 2020-03-13 | R. G. Lugar Center for Public Health Research, National Center for Disease Control and Public Health (NCDC) of Georgia. | R. G. Lugar Center for Public Health Research, National Center for Disease Control and Public Health (NCDC) of Georgia. | Adam Kotorashvili, Marine Murtskhvaladze, Nato Kotaria, Ann Machablishvili, Lela Sabadze, Mari Gavashelidze, Ana Papkauri, Meri Pantsulaia, Gvantsa Brachveli, Tata Imnadze, Tamar Jashiashvili, Tea Tevdoradze, Ketevan Sidamonidze, Ekaterine Khmaladze, Ekaterine Zhghenti, Roena Sukhiashvili, Mariam Zakalashvili, Lela Urushadze, Magda Dgebuadze, Giorgi Tomashvili, Davit Tsaguria, Ekaterine Zangaladze, Nino Berishvili, Gvantsa Chanturia, Maia Alkhazashvili, Irma Burjanadze, Anna Kasradze, Khatuna Zakhashvili, Paata Imnadze, Amiran Gamkrelidze. |
| 414 | EPI_ISL_416484 | hCoV-19/Spain/Valencia5/2020 | <i>Homo sapiens</i> | Europe/Spain/Comunitat_Valenciana/Valencia | 2020-02-27 | Servicio de Microbiología. Consorcio Hospital General Universitario de Valencia                                         | Sequencing and Bioinformatics Service and Molecular Epidemiology Research Group. FISABIO-Public Health                  | Maria Dolores Ocete, Concepcion Gimeno, Giuseppe D'Auria, Griselda De Marco, Neris Garcia-Gonzalez, Maria Alma Bracho, Fernando Gonzalez-Candelas                                                                                                                                                                                                                                                                                                                                                                                                                 |
| 414 | EPI_ISL_416487 | hCoV-19/Spain/Valencia8/2020 | <i>Homo sapiens</i> | Europe/Spain/Comunitat_Valenciana/Valencia | 2020-03-04 | Servicio de Microbiología. Consorcio Hospital General Universitario de Valencia                                         | Sequencing and Bioinformatics Service and Molecular Epidemiology Research Group. FISABIO-Public Health                  | Giuseppe D'Auria, Griselda De Marco, Neris Garcia-Gonzalez, Maria Alma Bracho, Maria Dolores Ocete, Concepcion Gimeno, Fernando Gonzalez-Candelas                                                                                                                                                                                                                                                                                                                                                                                                                 |

|     |                |                                   |                     |                                               |            |                                                                                                                                                                      |                                                                                                                                                                      |                                                                                                                                                                                                                                                                                                      |
|-----|----------------|-----------------------------------|---------------------|-----------------------------------------------|------------|----------------------------------------------------------------------------------------------------------------------------------------------------------------------|----------------------------------------------------------------------------------------------------------------------------------------------------------------------|------------------------------------------------------------------------------------------------------------------------------------------------------------------------------------------------------------------------------------------------------------------------------------------------------|
| 415 | EPI_ISL_416488 | hCoV-19/Poland/PL_P1/2020         | <i>Homo sapiens</i> | Europe / Poland / Zielonogorskie              | 2020-03-03 | ViroGenetics - BSL3 Laboratory of Virology; Homo sapiens Genome Variation Research Group & Genomics Centre MCB; Bioinformatics Research Group Department of Virology | ViroGenetics - BSL3 Laboratory of Virology; Homo sapiens Genome Variation Research Group & Genomics Centre MCB; Bioinformatics Research Group Department of Virology | Aleksandra Milewska, Ewelina Pośpiech, Agata Jarosz, Adrianna Klajmon, Kamila Marszałek, Katarzyna Pancer, Magdalena Rzczkowska, Tomasz Wolkowicz, Katarzyna Zacharczuk, Agnieszka Kolakowska-Kulesza, Natalia Wolaniuk, Ewelina Hallman-Szełińska, Paweł P Łabaj, Wojciech Branicki, Krzysztof Pyrc |
| 416 | EPI_ISL_416494 | hCoV-19/France/N2223/2020         | <i>Homo sapiens</i> | Europe / France / Normandie / Rouen           | 2020-03-04 | Centre Hospitalier Universitaire de Rouen Laboratoire de Virologie                                                                                                   | National Reference Center for Viruses of Respiratory Infections, Institut Pasteur, Paris                                                                             | Mélnie Albert, Marion Barbet, Sylvie Behillil, Méline Bizard, Angela Brisebarre, Flora Donati, Etienne Simon-Lorière, Vincent Enouf, Maud Vanpeene, Sylvie van der Werf, Jean-Christophe Plantier                                                                                                    |
| 417 | EPI_ISL_416495 | hCoV-19/France/HF2234/2020        | <i>Homo sapiens</i> | Europe / France / Hauts de France / Compiègne | 2020-03-10 | Centre Hospitalier Compiègne Laboratoire de Biologie                                                                                                                 | National Reference Center for Viruses of Respiratory Infections, Institut Pasteur, Paris                                                                             | Mélnie Albert, Marion Barbet, Sylvie Behillil, Méline Bizard, Angela Brisebarre, Flora Donati, Etienne Simon-Lorière, Vincent Enouf, Maud Vanpeene, Sylvie van der Werf, Raulin Olivia                                                                                                               |
| 418 | EPI_ISL_416496 | hCoV-19/France/HF2237/2020        | <i>Homo sapiens</i> | Europe / France / Hauts de France / Compiègne | 2020-03-10 | Centre Hospitalier Compiègne Laboratoire de Biologie                                                                                                                 | National Reference Center for Viruses of Respiratory Infections, Institut Pasteur, Paris                                                                             | Mélnie Albert, Marion Barbet, Sylvie Behillil, Méline Bizard, Angela Brisebarre, Flora Donati, Etienne Simon-Lorière, Vincent Enouf, Maud Vanpeene, Sylvie van der Werf, Raulin Olivia                                                                                                               |
| 419 | EPI_ISL_416497 | hCoV-19/France/HF2239/2020        | <i>Homo sapiens</i> | Europe / France / Hauts de France / Compiègne | 2020-03-10 | Centre Hospitalier Compiègne Laboratoire de Biologie                                                                                                                 | National Reference Center for Viruses of Respiratory Infections, Institut Pasteur, Paris                                                                             | Mélnie Albert, Marion Barbet, Sylvie Behillil, Méline Bizard, Angela Brisebarre, Flora Donati, Etienne Simon-Lorière, Vincent Enouf, Maud Vanpeene, Sylvie van der Werf, Raulin Olivia                                                                                                               |
| 420 | EPI_ISL_416498 | hCoV-19/France/IDF2256/2020       | <i>Homo sapiens</i> | Europe / France / Ile de France / Garches     | 2020-03-11 | Institut Médico légal- Hop R. Poincaré                                                                                                                               | National Reference Center for Viruses of Respiratory Infections, Institut Pasteur, Paris                                                                             | Mélnie Albert, Marion Barbet, Sylvie Behillil, Méline Bizard, Angela Brisebarre, Flora Donati, Etienne Simon-Lorière, Vincent Enouf, Maud Vanpeene, Sylvie van der Werf                                                                                                                              |
| 421 | EPI_ISL_416499 | hCoV-19/France/IDF2278/2020       | <i>Homo sapiens</i> | Europe / France / Ile de France / Longjumeau  | 2020-03-11 | LABM GH nord Essonne                                                                                                                                                 | National Reference Center for Viruses of Respiratory Infections, Institut Pasteur, Paris                                                                             | Mélnie Albert, Marion Barbet, Sylvie Behillil, Méline Bizard, Angela Brisebarre, Flora Donati, Etienne Simon-Lorière, Vincent Enouf, Maud Vanpeene, Sylvie van der Werf                                                                                                                              |
| 422 | EPI_ISL_416502 | hCoV-19/France/B2330/2020         | <i>Homo sapiens</i> | Europe / France / Bretagne / Rennes           | 2020-02-26 | CHRU Pontchaillou - Laboratoire de Virologie                                                                                                                         | National Reference Center for Viruses of Respiratory Infections, Institut Pasteur, Paris                                                                             | Mélnie Albert, Marion Barbet, Sylvie Behillil, Méline Bizard, Angela Brisebarre, Flora Donati, Etienne Simon-Lorière, Vincent Enouf, Maud Vanpeene, Sylvie van der Werf, Gisèle Lagathu                                                                                                              |
| 423 | EPI_ISL_416503 | hCoV-19/France/B2334/2020         | <i>Homo sapiens</i> | Europe / France / Bretagne / Rennes           | 2020-03-01 | CHRU Pontchaillou - Laboratoire de Virologie                                                                                                                         | National Reference Center for Viruses of Respiratory Infections, Institut Pasteur, Paris                                                                             | Mélnie Albert, Marion Barbet, Sylvie Behillil, Méline Bizard, Angela Brisebarre, Flora Donati, Etienne Simon-Lorière, Vincent Enouf, Maud Vanpeene, Sylvie van der Werf, Gisèle Lagathu                                                                                                              |
| 424 | EPI_ISL_416505 | hCoV-19/France/B2336/2020         | <i>Homo sapiens</i> | Europe / France / Bretagne / Rennes           | 2020-03-02 | CHRU Pontchaillou - Laboratoire de Virologie                                                                                                                         | National Reference Center for Viruses of Respiratory Infections, Institut Pasteur, Paris                                                                             | Mélnie Albert, Marion Barbet, Sylvie Behillil, Méline Bizard, Angela Brisebarre, Flora Donati, Etienne Simon-Lorière, Vincent Enouf, Maud Vanpeene, Sylvie van der Werf, Gisèle Lagathu                                                                                                              |
| 425 | EPI_ISL_416506 | hCoV-19/France/B2337/2020         | <i>Homo sapiens</i> | Europe / France / Bretagne / Rennes           | 2020-03-03 | CHRU Pontchaillou - Laboratoire de Virologie                                                                                                                         | National Reference Center for Viruses of Respiratory Infections, Institut Pasteur, Paris                                                                             | Mélnie Albert, Marion Barbet, Sylvie Behillil, Méline Bizard, Angela Brisebarre, Flora Donati, Etienne Simon-Lorière, Vincent Enouf, Maud Vanpeene, Sylvie van der Werf, Gisèle Lagathu                                                                                                              |
| 426 | EPI_ISL_416507 | hCoV-19/France/B2340/2020         | <i>Homo sapiens</i> | Europe / France / Bretagne / Rennes           | 2020-03-05 | CHRU Pontchaillou - Laboratoire de Virologie                                                                                                                         | National Reference Center for Viruses of Respiratory Infections, Institut Pasteur, Paris                                                                             | Mélnie Albert, Marion Barbet, Sylvie Behillil, Méline Bizard, Angela Brisebarre, Flora Donati, Etienne Simon-Lorière, Vincent Enouf, Maud Vanpeene, Sylvie van der Werf, Gisèle Lagathu                                                                                                              |
| 427 | EPI_ISL_416509 | hCoV-19/France/B2344/2020         | <i>Homo sapiens</i> | Europe / France / Bretagne / Rennes           | 2020-03-06 | CHRU Pontchaillou - Laboratoire de Virologie                                                                                                                         | National Reference Center for Viruses of Respiratory Infections, Institut Pasteur, Paris                                                                             | Mélnie Albert, Marion Barbet, Sylvie Behillil, Méline Bizard, Angela Brisebarre, Flora Donati, Etienne Simon-Lorière, Vincent Enouf, Maud Vanpeene, Sylvie van der Werf, Gisèle Lagathu                                                                                                              |
| 428 | EPI_ISL_416510 | hCoV-19/France/B2346/2020         | <i>Homo sapiens</i> | Europe / France / Bretagne / Rennes           | 2020-03-06 | CHRU Pontchaillou - Laboratoire de Virologie                                                                                                                         | National Reference Center for Viruses of Respiratory Infections, Institut Pasteur, Paris                                                                             | Mélnie Albert, Marion Barbet, Sylvie Behillil, Méline Bizard, Angela Brisebarre, Flora Donati, Etienne Simon-Lorière, Vincent Enouf, Maud Vanpeene, Sylvie van der Werf, Gisèle Lagathu                                                                                                              |
| 429 | EPI_ISL_416513 | hCoV-19/France/B2351/2020         | <i>Homo sapiens</i> | Europe / France / Bretagne / Rennes           | 2020-03-07 | CHRU Pontchaillou - Laboratoire de Virologie                                                                                                                         | National Reference Center for Viruses of Respiratory Infections, Institut Pasteur, Paris                                                                             | Mélnie Albert, Marion Barbet, Sylvie Behillil, Méline Bizard, Angela Brisebarre, Flora Donati, Etienne Simon-Lorière, Vincent Enouf, Maud Vanpeene, Sylvie van der Werf, Gisèle Lagathu                                                                                                              |
| 430 | EPI_ISL_416519 | hCoV-19/New Zealand/20VR0189/2020 | <i>Homo sapiens</i> | Oceania / New Zealand / Auckland              | 2020-03-02 | Auckland Hospital                                                                                                                                                    | Institute of Environmental Science and Research (ESR)                                                                                                                | Matt Storey, Xiaoyun Ren, Gary McAuliffe, Sally Roberts, Matthew Blakiston, Erasmus Smit, Lauren Jelly, Joep de Ligt                                                                                                                                                                                 |

|     |                |                                     |                     |                                    |            |                                                                        |                                                                                                                                 |                                                                                                                                                                                                                                   |
|-----|----------------|-------------------------------------|---------------------|------------------------------------|------------|------------------------------------------------------------------------|---------------------------------------------------------------------------------------------------------------------------------|-----------------------------------------------------------------------------------------------------------------------------------------------------------------------------------------------------------------------------------|
| 430 | EPI_ISL_416732 | hCoV-19/England/SHEF-BFCDF/2020     | <i>Homo sapiens</i> | Europe / England / London          | 2020-03-03 | Virology Department, Sheffield Teaching Hospitals NHS Foundation Trust | Department of Infection, Immunity and Cardiovascular Disease, The Florey Institute, The Medical School, University of Sheffield | Thushan de Silva, Matthew Parker, Adri Angyal, Rebecca Brown, Matthew Wyles, Mehmet Yavuz, Mohammad Raza, Cariad Evans                                                                                                            |
| 430 | EPI_ISL_416734 | hCoV-19/England/SHEF-BFCDF/2020     | <i>Homo sapiens</i> | Europe / England / South Yorkshire | 2020-03-09 | Virology Department, Sheffield Teaching Hospitals NHS Foundation Trust | Department of Infection, Immunity and Cardiovascular Disease, The Florey Institute, The Medical School, University of Sheffield | Thushan de Silva, Matthew Parker, Adri Angyal, Rebecca Brown, Matthew Wyles, Mehmet Yavuz, Mohammad Raza, Cariad Evans                                                                                                            |
| 431 | EPI_ISL_416521 | hCoV-19/Saudi Arabia/SCDC-3321/2020 | <i>Homo sapiens</i> | Asia / Saudi Arabia                | 2020-03-10 | Public Health Laboratory                                               | Public Health Laboratory, Saudi CDC                                                                                             | Albarrag, A                                                                                                                                                                                                                       |
| 431 | EPI_ISL_416522 | hCoV-19/Saudi Arabia/SCDC-3324/2020 | <i>Homo sapiens</i> | Asia / Saudi Arabia                | 2020-03-10 | Public Health Laboratory, Saudi CDC                                    | Public Health Laboratory, Saudi CDC                                                                                             | Albarrag,A                                                                                                                                                                                                                        |
| 432 | EPI_ISL_416524 | hCoV-19/Japan/SMU-0311S2/2020       | <i>Homo sapiens</i> | Asia / Japan / Saitama             | 2020-03-11 | Saitama Medical University Hospital                                    | Saitama Medical University                                                                                                      | Kazuo Imai                                                                                                                                                                                                                        |
| 433 | EPI_ISL_416525 | hCoV-19/Japan/SMU-0311S3/2020       | <i>Homo sapiens</i> | Asia / Japan / Saitama             | 2020-03-11 | Saitama Medical University                                             | Saitama Medical University                                                                                                      | Kazuo Imai                                                                                                                                                                                                                        |
| 434 | EPI_ISL_416538 | hCoV-19/New Zealand/20VR0275/2020   | <i>Homo sapiens</i> | Oceania / New Zealand / Wellington | 2020-03-15 | Wellington Hospital                                                    | Institute of Environmental Science and Research (ESR)                                                                           | Wellington SCL, Wellington Hospital, Riddiford Street, Newtown, Wellington 6021, New Zealand                                                                                                                                      |
| 435 | EPI_ISL_416539 | hCoV-19/New Zealand/20VR0276/2020   | <i>Homo sapiens</i> | Oceania / New Zealand / Wellington | 2020-03-15 | Wellington Hospital                                                    | Institute of Environmental Science and Research (ESR)                                                                           | Matt Storey, Xiaoyun Ren, Craig Thornley, Maxim Bloomfield, Erasmus Smit, Lauren Jelly, Joep de Lig                                                                                                                               |
| 436 | EPI_ISL_416541 | hCoV-19/Kuwait/KU09/2020            | <i>Homo sapiens</i> | Asia / Kuwait / Dasman             | 2020-03-02 | Dasman Diabetes Institute and Virology Laboratory Ministry of Health   | Dasman Diabetes Institute                                                                                                       | Fahd Al-Mulla, Sumi John, Rasheeba Iqbal, Motasem Melhem, Ebaa AlOzairi, Sara Al-Qabandi, Qais Al-Duwairi                                                                                                                         |
| 437 | EPI_ISL_416542 | hCoV-19/Kuwait/KU17/2020            | <i>Homo sapiens</i> | Asia / Kuwait / Dasman             | 2020-03-02 | Dasman Diabetes Institute                                              | Dasman Diabetes Institute                                                                                                       | Fahd Al-Mulla, Sumi John, Rasheeba Iqbal, Motasem Melhem, Ebaa AlOzairi, Sara Al-Qabandi, Qais Al-Duwairi                                                                                                                         |
| 438 | EPI_ISL_416566 | hCoV-19/Japan/DP0027/2020           | <i>Homo sapiens</i> | Asia / Japan / unknown             | 2020-02-15 | Japanese Quarantine Stations                                           | Pathogen Genomics Center, National Institute of Infectious Diseases                                                             | Tsuyoshi Sekizuka, Kentaro Itokawa, Rina Tanaka, Masanori Hashino, Tsutomu Kageyama, Shinji Saito, Ikuyo Takayama, Hideki Hasegawa, Takuri Takahashi, Hajime Kamiya, Takuya Yamagishi, Motoi Suzuki, Takaji Wakita, Makoto Kuroda |
| 439 | EPI_ISL_416567 | hCoV-19/Japan/DP0037/2020           | <i>Homo sapiens</i> | Asia / Japan / unknown             | 2020-02-15 | Japanese Quarantine Stations                                           | Pathogen Genomics Center, National Institute of Infectious Diseases                                                             | Tsuyoshi Sekizuka, Kentaro Itokawa, Rina Tanaka, Masanori Hashino, Tsutomu Kageyama, Shinji Saito, Ikuyo Takayama, Hideki Hasegawa, Takuri Takahashi, Hajime Kamiya, Takuya Yamagishi, Motoi Suzuki, Takaji Wakita, Makoto Kuroda |
| 440 | EPI_ISL_416569 | hCoV-19/Japan/DP0059/2020           | <i>Homo sapiens</i> | Asia / Japan / unknown             | 2020-02-15 | Japanese Quarantine Stations                                           | Pathogen Genomics Center, National Institute of Infectious Diseases                                                             | Tsuyoshi Sekizuka, Kentaro Itokawa, Rina Tanaka, Masanori Hashino, Tsutomu Kageyama, Shinji Saito, Ikuyo Takayama, Hideki Hasegawa, Takuri Takahashi, Hajime Kamiya, Takuya Yamagishi, Motoi Suzuki, Takaji Wakita, Makoto Kuroda |
| 441 | EPI_ISL_416570 | hCoV-19/Japan/DP0065/2020           | <i>Homo sapiens</i> | Asia / Japan / unknown             | 2020-02-15 | Japanese Quarantine Stations                                           | Pathogen Genomics Center, National Institute of Infectious Diseases                                                             | Tsuyoshi Sekizuka, Kentaro Itokawa, Rina Tanaka, Masanori Hashino, Tsutomu Kageyama, Shinji Saito, Ikuyo Takayama, Hideki Hasegawa, Takuri Takahashi, Hajime Kamiya, Takuya Yamagishi, Motoi Suzuki, Takaji Wakita, Makoto Kuroda |
| 442 | EPI_ISL_416571 | hCoV-19/Japan/DP0077/2020           | <i>Homo sapiens</i> | Asia / Japan / unknown             | 2020-02-15 | Japanese Quarantine Stations                                           | Pathogen Genomics Center, National Institute of Infectious Diseases                                                             | Tsuyoshi Sekizuka, Kentaro Itokawa, Rina Tanaka, Masanori Hashino, Tsutomu Kageyama, Shinji Saito, Ikuyo Takayama, Hideki Hasegawa, Takuri Takahashi, Hajime Kamiya, Takuya Yamagishi, Motoi Suzuki, Takaji Wakita, Makoto Kuroda |
| 443 | EPI_ISL_416572 | hCoV-19/Japan/DP0078/2020           | <i>Homo sapiens</i> | Asia / Japan / unknown             | 2020-02-15 | Japanese Quarantine Stations                                           | Pathogen Genomics Center, National Institute of Infectious Diseases                                                             | Tsuyoshi Sekizuka, Kentaro Itokawa, Rina Tanaka, Masanori Hashino, Tsutomu Kageyama, Shinji Saito, Ikuyo Takayama, Hideki Hasegawa, Takuri Takahashi, Hajime Kamiya, Takuya Yamagishi, Motoi Suzuki, Takaji Wakita, Makoto Kuroda |
| 443 | EPI_ISL_416573 | hCoV-19/Japan/DP0104/2020           | <i>Homo sapiens</i> | Asia / Japan / unknown             | 2020-02-15 | Japanese Quarantine Stations                                           | Pathogen Genomics Center, National Institute of Infectious Diseases                                                             | Tsuyoshi Sekizuka, Kentaro Itokawa, Rina Tanaka, Masanori Hashino, Tsutomu Kageyama, Shinji Saito, Ikuyo Takayama, Hideki Hasegawa, Takuri Takahashi, Hajime Kamiya, Takuya Yamagishi, Motoi Suzuki, Takaji Wakita, Makoto Kuroda |













|     |                |                           |                     |                                  |            |                 |                 |                                                                   |
|-----|----------------|---------------------------|---------------------|----------------------------------|------------|-----------------|-----------------|-------------------------------------------------------------------|
| 515 | EPI_ISL_416687 | hCoV-19/USA/WA-UW149/2020 | <i>Homo sapiens</i> | North America / USA / Washington | 2020-03-14 | UW Virology Lab | UW Virology Lab | Pavitra Roychoudhury, Hong Xie, Keith Jerome, Alexander Greninger |
| 516 | EPI_ISL_416688 | hCoV-19/USA/WA-UW150/2020 | <i>Homo sapiens</i> | North America / USA / Washington | 2020-03-14 | UW Virology Lab | UW Virology Lab | Pavitra Roychoudhury, Hong Xie, Keith Jerome, Alexander Greninger |
| 516 | EPI_ISL_416705 | hCoV-19/USA/WA-UW167/2020 | <i>Homo sapiens</i> | North America / USA / Washington | 2020-03-13 | UW Virology Lab | UW Virology Lab | Pavitra Roychoudhury, Hong Xie, Keith Jerome, Alexander Greninger |
| 517 | EPI_ISL_416690 | hCoV-19/USA/WA-UW152/2020 | <i>Homo sapiens</i> | North America / USA / Washington | 2020-03-13 | UW Virology Lab | UW Virology Lab | Pavitra Roychoudhury, Hong Xie, Keith Jerome, Alexander Greninger |
| 518 | EPI_ISL_416691 | hCoV-19/USA/WA-UW153/2020 | <i>Homo sapiens</i> | North America / USA / Washington | 2020-03-13 | UW Virology Lab | UW Virology Lab | Pavitra Roychoudhury, Hong Xie, Keith Jerome, Alexander Greninger |
| 519 | EPI_ISL_416693 | hCoV-19/USA/WA-UW155/2020 | <i>Homo sapiens</i> | North America / USA / Washington | 2020-03-12 | UW Virology Lab | UW Virology Lab | Pavitra Roychoudhury, Hong Xie, Keith Jerome, Alexander Greninger |
| 520 | EPI_ISL_416694 | hCoV-19/USA/WA-UW156/2020 | <i>Homo sapiens</i> | North America / USA / Washington | 2020-03-13 | UW Virology Lab | UW Virology Lab | Pavitra Roychoudhury, Hong Xie, Keith Jerome, Alexander Greninger |
| 521 | EPI_ISL_416696 | hCoV-19/USA/WA-UW158/2020 | <i>Homo sapiens</i> | North America / USA / Washington | 2020-03-13 | UW Virology Lab | UW Virology Lab | Pavitra Roychoudhury, Hong Xie, Keith Jerome, Alexander Greninger |
| 522 | EPI_ISL_416697 | hCoV-19/USA/WA-UW159/2020 | <i>Homo sapiens</i> | North America / USA / Washington | 2020-03-13 | UW Virology Lab | UW Virology Lab | Pavitra Roychoudhury, Hong Xie, Keith Jerome, Alexander Greninger |
| 523 | EPI_ISL_416698 | hCoV-19/USA/WA-UW160/2020 | <i>Homo sapiens</i> | North America / USA / Washington | 2020-03-13 | UW Virology Lab | UW Virology Lab | Pavitra Roychoudhury, Hong Xie, Keith Jerome, Alexander Greninger |
| 524 | EPI_ISL_416700 | hCoV-19/USA/WA-UW162/2020 | <i>Homo sapiens</i> | North America / USA / Washington | 2020-03-13 | UW Virology Lab | UW Virology Lab | Pavitra Roychoudhury, Hong Xie, Keith Jerome, Alexander Greninger |
| 525 | EPI_ISL_416703 | hCoV-19/USA/WA-UW165/2020 | <i>Homo sapiens</i> | North America / USA / Washington | 2020-03-13 | UW Virology Lab | UW Virology Lab | Pavitra Roychoudhury, Hong Xie, Keith Jerome, Alexander Greninger |
| 526 | EPI_ISL_416706 | hCoV-19/USA/WA-UW168/2020 | <i>Homo sapiens</i> | North America / USA / Washington | 2020-03-13 | UW Virology Lab | UW Virology Lab | Pavitra Roychoudhury, Hong Xie, Keith Jerome, Alexander Greninger |
| 527 | EPI_ISL_416707 | hCoV-19/USA/WA-UW169/2020 | <i>Homo sapiens</i> | North America / USA / Washington | 2020-03-14 | UW Virology Lab | UW Virology Lab | Pavitra Roychoudhury, Hong Xie, Keith Jerome, Alexander Greninger |
| 528 | EPI_ISL_416709 | hCoV-19/USA/WA-UW171/2020 | <i>Homo sapiens</i> | North America / USA / Washington | 2020-03-13 | UW Virology Lab | UW Virology Lab | Pavitra Roychoudhury, Hong Xie, Keith Jerome, Alexander Greninger |
| 529 | EPI_ISL_416710 | hCoV-19/USA/WA-UW172/2020 | <i>Homo sapiens</i> | North America / USA / Washington | 2020-03-13 | UW Virology Lab | UW Virology Lab | Pavitra Roychoudhury, Hong Xie, Keith Jerome, Alexander Greninger |
| 530 | EPI_ISL_416711 | hCoV-19/USA/WA-UW173/2020 | <i>Homo sapiens</i> | North America / USA / Washington | 2020-03-15 | UW Virology Lab | UW Virology Lab | Pavitra Roychoudhury, Hong Xie, Keith Jerome, Alexander Greninger |
| 531 | EPI_ISL_416713 | hCoV-19/USA/WA-UW175/2020 | <i>Homo sapiens</i> | North America / USA / Washington | 2020-03-15 | UW Virology Lab | UW Virology Lab | Pavitra Roychoudhury, Hong Xie, Keith Jerome, Alexander Greninger |

|     |                |                                 |                     |                                     |            |                                                                        |                                                                                                                                 |                                                                                                                        |
|-----|----------------|---------------------------------|---------------------|-------------------------------------|------------|------------------------------------------------------------------------|---------------------------------------------------------------------------------------------------------------------------------|------------------------------------------------------------------------------------------------------------------------|
| 532 | EPI_ISL_416714 | hCoV-19/USA/WA-UW176/2020       | <i>Homo sapiens</i> | North America / USA / Washington    | 2020-03-14 | UW Virology Lab                                                        | UW Virology Lab                                                                                                                 | Pavitra Roychoudhury, Hong Xie, Keith Jerome, Alexander Greninger                                                      |
| 533 | EPI_ISL_416715 | hCoV-19/USA/WA-UW177/2020       | <i>Homo sapiens</i> | North America / USA / Washington    | 2020-03-15 | UW Virology Lab                                                        | UW Virology Lab                                                                                                                 | Pavitra Roychoudhury, Hong Xie, Keith Jerome, Alexander Greninger                                                      |
| 534 | EPI_ISL_416716 | hCoV-19/USA/WA-UW178/2020       | <i>Homo sapiens</i> | North America / USA / Washington    | 2020-03-13 | UW Virology Lab                                                        | UW Virology Lab                                                                                                                 | Pavitra Roychoudhury, Hong Xie, Keith Jerome, Alexander Greninger                                                      |
| 535 | EPI_ISL_416717 | hCoV-19/USA/WA-UW179/2020       | <i>Homo sapiens</i> | North America / USA / Washington    | 2020-03-15 | UW Virology Lab                                                        | UW Virology Lab                                                                                                                 | Pavitra Roychoudhury, Hong Xie, Keith Jerome, Alexander Greninger                                                      |
| 536 | EPI_ISL_416718 | hCoV-19/USA/WA-UW180/2020       | <i>Homo sapiens</i> | North America / USA / Washington    | 2020-03-14 | UW Virology Lab                                                        | UW Virology Lab                                                                                                                 | Pavitra Roychoudhury, Hong Xie, Keith Jerome, Alexander Greninger                                                      |
| 537 | EPI_ISL_416721 | hCoV-19/USA/WA-UW183/2020       | <i>Homo sapiens</i> | North America / USA / Washington    | 2020-03-13 | UW Virology Lab                                                        | UW Virology Lab                                                                                                                 | Pavitra Roychoudhury, Hong Xie, Keith Jerome, Alexander Greninger                                                      |
| 538 | EPI_ISL_416723 | hCoV-19/USA/WA-UW185/2020       | <i>Homo sapiens</i> | North America / USA / Washington    | 2020-03-14 | UW Virology Lab                                                        | UW Virology Lab                                                                                                                 | Pavitra Roychoudhury, Hong Xie, Keith Jerome, Alexander Greninger                                                      |
| 539 | EPI_ISL_416724 | hCoV-19/USA/WA-UW186/2020       | <i>Homo sapiens</i> | North America / USA / Washington    | 2020-03-13 | UW Virology Lab                                                        | UW Virology Lab                                                                                                                 | Pavitra Roychoudhury, Hong Xie, Keith Jerome, Alexander Greninger                                                      |
| 540 | EPI_ISL_416725 | hCoV-19/USA/WA-UW187/2020       | <i>Homo sapiens</i> | North America / USA / Washington    | 2020-03-13 | UW Virology Lab                                                        | UW Virology Lab                                                                                                                 | Pavitra Roychoudhury, Hong Xie, Keith Jerome, Alexander Greninger                                                      |
| 541 | EPI_ISL_416726 | hCoV-19/USA/WA-UW188/2020       | <i>Homo sapiens</i> | North America / USA / Washington    | 2020-03-13 | UW Virology Lab                                                        | UW Virology Lab                                                                                                                 | Pavitra Roychoudhury, Hong Xie, Keith Jerome, Alexander Greninger                                                      |
| 542 | EPI_ISL_416727 | hCoV-19/USA/WA-UW189/2020       | <i>Homo sapiens</i> | North America / USA / Washington    | 2020-03-13 | UW Virology Lab                                                        | UW Virology Lab                                                                                                                 | Pavitra Roychoudhury, Hong Xie, Keith Jerome, Alexander Greninger                                                      |
| 543 | EPI_ISL_416728 | hCoV-19/USA/WA-UW190/2020       | <i>Homo sapiens</i> | North America / USA / Washington    | 2020-03-13 | UW Virology Lab                                                        | UW Virology Lab                                                                                                                 | Pavitra Roychoudhury, Hong Xie, Keith Jerome, Alexander Greninger                                                      |
| 544 | EPI_ISL_416729 | hCoV-19/USA/WA-UW191/2020       | <i>Homo sapiens</i> | North America / USA / Washington    | 2020-03-13 | UW Virology Lab                                                        | UW Virology Lab                                                                                                                 | Pavitra Roychoudhury, Hong Xie, Keith Jerome, Alexander Greninger                                                      |
| 545 | EPI_ISL_416730 | hCoV-19/England/SHEF-BFCB1/2020 | <i>Homo sapiens</i> | Europe / England / South Yorkshire  | 2020-03-03 | Virology Department, Sheffield Teaching Hospitals NHS Foundation Trust | Department of Infection, Immunity and Cardiovascular Disease, The Florey Institute, The Medical School, University of Sheffield | Thushan de Silva, Matthew Parker, Adri Angyal, Rebecca Brown, Matthew Wyles, Mehmet Yavuz, Mohammad Raza, Cariad Evans |
| 546 | EPI_ISL_416731 | hCoV-19/England/SHEF-BFCC0/2020 | <i>Homo sapiens</i> | Europe / England / Northamptonshire | 2020-03-03 | Virology Department, Sheffield Teaching Hospitals NHS Foundation Trust | Department of Infection, Immunity and Cardiovascular Disease, The Florey Institute, The Medical School, University of Sheffield | Thushan de Silva, Matthew Parker, Adri Angyal, Rebecca Brown, Matthew Wyles, Mehmet Yavuz, Mohammad Raza, Cariad Evans |
| 547 | EPI_ISL_416733 | hCoV-19/England/SHEF-BFCEE/2020 | <i>Homo sapiens</i> | Europe / England / South Yorkshire  | 2020-03-07 | Virology Department, Sheffield Teaching Hospitals NHS Foundation Trust | Department of Infection, Immunity and Cardiovascular Disease, The Florey Institute, The Medical School, University of Sheffield | Thushan de Silva, Matthew Parker, Adri Angyal, Rebecca Brown, Matthew Wyles, Mehmet Yavuz, Mohammad Raza, Cariad Evans |
| 548 | EPI_ISL_416740 | hCoV-19/England/SHEF-BFD54/2020 | <i>Homo sapiens</i> | Europe / England / South Yorkshire  | 2020-03-03 | Virology Department, Sheffield Teaching Hospitals NHS Foundation Trust | Department of Infection, Immunity and Cardiovascular Disease, The Florey Institute, The Medical School, University of Sheffield | Thushan de Silva, Matthew Parker, Adri Angyal, Rebecca Brown, Matthew Wyles, Mehmet Yavuz, Mohammad Raza, Cariad Evans |

|     |                |                                          |                     |                                     |            |                                                                    |                                                                              |                                                                                                                                                                                                                                                                 |
|-----|----------------|------------------------------------------|---------------------|-------------------------------------|------------|--------------------------------------------------------------------|------------------------------------------------------------------------------|-----------------------------------------------------------------------------------------------------------------------------------------------------------------------------------------------------------------------------------------------------------------|
| 549 | EPI_ISL_416741 | hCoV-19/Lithuania/ChVir1632/2020         | <i>Homo sapiens</i> | Europe / Lithuania / Vilnius        | 2020-02    | National Public Health Surveillance Laboratory, Vilnius, Lithuania | Charite Universitaetsmedizin Berlin, Institute of Virology                   | Victor M Corman, Julia Schneider, Jörn Beheim-Schwarzbach, Talitha Veith, Barbara Muehleemann, Terry Jones, Ana Steponkiene, Christian Drosten                                                                                                                  |
| 550 | EPI_ISL_416744 | hCoV-19/Hungary/49/2020                  | <i>Homo sapiens</i> | Europe / Hungary / Baranya          | 2020-03-20 | Virological Research Group, Szentágothai Research Centre           | Bioinformatics Research Group, Szentágothai Research Centre                  | Péter Urbán, Endre Gábor Tóth, Gábor Kemenesi, Róbert Herczeg, Attila Gyenesi, Ferenc Jakab                                                                                                                                                                     |
| 551 | EPI_ISL_416746 | hCoV-19/France/Valence_425/2020          | <i>Homo sapiens</i> | Europe / France / ARA               | 2020-03-03 | CNR Virus des Infections Respiratoires - France SUD                | CNR Virus des Infections Respiratoires - France SUD                          | Bal, Antonin; Destras, Gregory; Gaymard, Alexandre; Bouscambert-Duchamp, Maude; Cheynet, Valérie; Brengel-Pesce, Karen; Morfin-Sherpa, Florence; Valette, Martine; Josset, Laurence; Lina, Bruno.                                                               |
| 552 | EPI_ISL_416749 | hCoV-19/France/Valence_532/2020          | <i>Homo sapiens</i> | Europe / France / ARA               | 2020-03-04 | Centre Hospitalier de Valence                                      | CNR Virus des Infections Respiratoires - France SUD                          | Bal, Antonin; Destras, Gregory; Gaymard, Alexandre; Bouscambert-Duchamp, Maude; Cheynet, Valérie; Brengel-Pesce, Karen; Morfin-Sherpa, Florence; Valette, Martine; Josset, Laurence; Lina, Bruno.                                                               |
| 553 | EPI_ISL_416751 | hCoV-19/France/Clermont-Ferrand_651/2020 | <i>Homo sapiens</i> | Europe / France / ARA               | 2020-03-05 | CHU Gabriel Montpied                                               | CNR Virus des Infections Respiratoires - France SUD                          | Bal, Antonin; Destras, Gregory; Gaymard, Alexandre; Bouscambert-Duchamp, Maude; Cheynet, Valérie; Brengel-Pesce, Karen; Morfin-Sherpa, Florence; Valette, Martine; Josset, Laurence; Lina, Bruno.                                                               |
| 554 | EPI_ISL_416829 | hCoV-19/Malaysia/MKAK-CL-2020-5045/2020  | <i>Homo sapiens</i> | Asia / Malaysia / Selangor          | 2020-02-20 | National Public Health Laboratory                                  | Malaysia Genome Institute                                                    | Mohd Noor Mat Isa, Irni Suhayu Sopian, Yusuf Muhammd Noor, Hezreen Iqbal, Mohd Faizal Abu Bakar, Enizza Kassim, Shamsidar Sopia, Azrin Ahmad, Norazfa Johari, Norazimah Tajudin, Selvanesan Sengol, Yu Kie Chem, Hani Mat Hussin, Shahrul Hisham Zainal Ariffin |
| 555 | EPI_ISL_416830 | hCoV-19/USA/NY-NYUMC2/2020               | <i>Homo sapiens</i> | North America / USA / New York City | 2020-03-16 | NYU Langone Health                                                 | Department of Pathology and Medicine, New York University School of Medicine | John Chen, Dacia Dimartino, Xiaojun Feng, Adriana Heguy, Megan Hogan, Emily Huang, George Jour, Christian Marier, Matt Maurano, Mark Mulligan, Peter Meyn, Marie Samanovic-Golden, Amy Rapkiewicz, Guomiao Shen, Matija Snuderl, Gael Westby, Paul Zappile      |
| 556 | EPI_ISL_416831 | hCoV-19/USA/NY-NYUMC3/2020               | <i>Homo sapiens</i> | North America / USA / New York City | 2020-03-16 | NYU Langone Health                                                 | Department of Pathology and Medicine, New York University School of Medicine | John Chen, Dacia Dimartino, Xiaojun Feng, Adriana Heguy, Megan Hogan, Emily Huang, George Jour, Christian Marier, Matt Maurano, Mark Mulligan, Peter Meyn, Marie Samanovic-Golden, Amy Rapkiewicz, Guomiao Shen, Matija Snuderl, Gael Westby, Paul Zappile      |
| 557 | EPI_ISL_416866 | hCoV-19/Malaysia/MKAK-CL-2020-5047/2020  | <i>Homo sapiens</i> | Asia/ Malaysia/Selangor             | 2020-02-20 | National Public Health Laboratory                                  | Malaysia Genome Institute                                                    | Mohd Noor Mat Isa, Irni Suhayu Sopian, Yusuf Muhammd Noor, Hezreen Iqbal, Mohd Faizal Abu Bakar, Enizza Kassim, Shamsidar Sopia, Azrin Ahmad, Norazfa Johari, Norazimah Tajudin, Selvanesan Sengol, Yu Kie Chem, Hani Mat Hussin, Shahrul Hisham Zainal Ariffin |
| 558 | EPI_ISL_417004 | hCoV-19/Belgium/ULG-3000/2020            | <i>Homo sapiens</i> | Europe / Belgium / Liège            | 2020-03-05 | Department of Clinical Microbiology                                | GIGA Medical Genomics                                                        | Durkin Keith, Artesi Maria, Bontems Sébastien, Boreux Raphaël, Meex Cécile, Melin Pierrette, Hayette Marie-Pierre, Bours Vincent.                                                                                                                               |
| 559 | EPI_ISL_417014 | hCoV-19/Belgium/ULG-6216/2020            | <i>Homo sapiens</i> | Europe / Belgium / Liège            | 2020-03-13 | Department of Clinical Microbiology                                | GIGA Medical Genomics                                                        | Durkin Keith, Artesi Maria, Bontems Sébastien, Boreux Raphaël, Meex Cécile, Melin Pierrette, Hayette Marie-Pierre, Bours Vincent.                                                                                                                               |
| 560 | EPI_ISL_417015 | hCoV-19/Belgium/ULG-6457/2020            | <i>Homo sapiens</i> | Europe / Belgium / Liège            | 2020-03-13 | Department of Clinical Microbiology                                | GIGA Medical Genomics                                                        | Durkin Keith, Artesi Maria, Bontems Sébastien, Boreux Raphaël, Meex Cécile, Melin Pierrette, Hayette Marie-Pierre, Bours Vincent.                                                                                                                               |
| 561 | EPI_ISL_417017 | hCoV-19/Belgium/ULG-6638/2020            | <i>Homo sapiens</i> | Europe / Belgium / Liège            | 2020-03-14 | Department of Clinical Microbiology                                | GIGA Medical Genomics                                                        | Durkin Keith, Artesi Maria, Bontems Sébastien, Boreux Raphaël, Meex Cécile, Melin Pierrette, Hayette Marie-Pierre, Bours Vincent.                                                                                                                               |
| 562 | EPI_ISL_417018 | hCoV-19/Belgium/ULG-6670/2020            | <i>Homo sapiens</i> | Europe / Belgium / Liège            | 2020-03-14 | Department of Clinical Microbiology                                | GIGA Medical Genomics                                                        | Durkin Keith, Artesi Maria, Bontems Sébastien, Boreux Raphaël, Meex Cécile, Melin Pierrette, Hayette Marie-Pierre, Bours Vincent.                                                                                                                               |
| 563 | EPI_ISL_417019 | hCoV-19/Belgium/ULG-6754/2020            | <i>Homo sapiens</i> | Europe / Belgium / Liège            | 2020-03-14 | Department of Clinical Microbiology                                | GIGA Medical Genomics                                                        | Durkin Keith, Artesi Maria, Bontems Sébastien, Boreux Raphaël, Meex Cécile, Melin Pierrette, Hayette Marie-Pierre, Bours Vincent.                                                                                                                               |

|     |                |                                         |                     |                                                     |            |                                                                                                                    |                                                                                                                    |                                                                                                                                                                                                                                                                                                                                                                                                |
|-----|----------------|-----------------------------------------|---------------------|-----------------------------------------------------|------------|--------------------------------------------------------------------------------------------------------------------|--------------------------------------------------------------------------------------------------------------------|------------------------------------------------------------------------------------------------------------------------------------------------------------------------------------------------------------------------------------------------------------------------------------------------------------------------------------------------------------------------------------------------|
| 564 | EPI_ISL_417020 | hCoV-19/Belgium/ULG-6939/2020           | <i>Homo sapiens</i> | Europe / Belgium / Liège                            | 2020-03-15 | Department of Clinical Microbiology                                                                                | GIGA Medical Genomics                                                                                              | Durkin Keith, Artesi Maria, Bontems Sébastien, Boreux Raphaël, Meex Cécile, Melin Pierrette, Hayette Marie-Pierre, Bours Vincent.                                                                                                                                                                                                                                                              |
| 565 | EPI_ISL_417021 | hCoV-19/Belgium/ULG-6942/2020           | <i>Homo sapiens</i> | Europe / Belgium / Liège                            | 2020-03-15 | Department of Clinical Microbiology                                                                                | GIGA Medical Genomics                                                                                              | Durkin Keith, Artesi Maria, Bontems Sébastien, Boreux Raphaël, Meex Cécile, Melin Pierrette, Hayette Marie-Pierre, Bours Vincent.                                                                                                                                                                                                                                                              |
| 565 | EPI_ISL_417022 | hCoV-19/Belgium/ULG-6948/2020           | <i>Homo sapiens</i> | Europe / Belgium / Liège                            | 2020-03-15 | Department of Clinical Microbiology                                                                                | GIGA Medical Genomics                                                                                              | Durkin Keith, Artesi Maria, Bontems Sébastien, Boreux Raphaël, Meex Cécile, Melin Pierrette, Hayette Marie-Pierre, Bours Vincent.                                                                                                                                                                                                                                                              |
| 565 | EPI_ISL_417023 | hCoV-19/Belgium/ULG-6950/2020           | <i>Homo sapiens</i> | Europe / Belgium / Liège                            | 2020-03-15 | Department of Clinical Microbiology                                                                                | GIGA Medical Genomics                                                                                              | Durkin Keith, Artesi Maria, Bontems Sébastien, Boreux Raphaël, Meex Cécile, Melin Pierrette, Hayette Marie-Pierre, Bours Vincent.                                                                                                                                                                                                                                                              |
| 566 | EPI_ISL_417025 | hCoV-19/Belgium/ULG-7019/2020           | <i>Homo sapiens</i> | Europe / Belgium / Liège                            | 2020-03-15 | Department of Clinical Microbiology                                                                                | GIGA Medical Genomics                                                                                              | Durkin Keith, Artesi Maria, Bontems Sébastien, Boreux Raphaël, Meex Cécile, Melin Pierrette, Hayette Marie-Pierre, Bours Vincent.                                                                                                                                                                                                                                                              |
| 567 | EPI_ISL_417028 | hCoV-19/USA/UT-00020/2020               | <i>Homo sapiens</i> | North America / USA / Utah                          | 2020-03-20 | Utah Public Health Laboratory                                                                                      | Utah Public Health Laboratory                                                                                      | Erin Young, Kelly Oakeson                                                                                                                                                                                                                                                                                                                                                                      |
| 568 | EPI_ISL_417031 | hCoV-19/Australia/QLDID919/2020         | <i>Homo sapiens</i> | Oceania / Australia / Queensland / Gold Coast       | 2020-03-11 | Pathology Queensland                                                                                               | Public Health Virology Laboratory                                                                                  | Bixing Huang, Alyssa Pyke, Amanda De Jong, Andrew Van Den Hurk, Carmel Taylor, David Warrilow, Doris Genge, Elisabeth Gamez, Glen Hewitson, Ian Maxwell Mackay, Inga Sultana, Jamie McMahon, Jean Barcelon, Judy Northill, Mitchell Finger, Natalie Simpson, Neelima Nair, Peter Burtonclay, Peter Moore, Sarah Wheatley, Sean Moody, Sonja Hall-Mendelin, Timothy Gardam, and Frederick Moore |
| 569 | EPI_ISL_417034 | hCoV-19/Brazil/AMBR-02/2020             | <i>Homo sapiens</i> | South America / Brazil / Amazonas State / Manaus    | 2020-03-16 | Laboratorio de Ecologia de Doencas Transmissíveis na Amazonia, Instituto Leonidas e Maria Deane - Fiocruz Amazonia | Laboratorio de Ecologia de Doencas Transmissíveis na Amazonia, Instituto Leonidas e Maria Deane - Fiocruz Amazonia | Valdinete Nascimento, André Corado, Fernanda Nascimento, Ágatha Costa, Debora Duarte, Luciana Gonçalves, Michele Jesus, Sérgio Luz, Felipe Naveca                                                                                                                                                                                                                                              |
| 570 | EPI_ISL_417064 | hCoV-19/Hong Kong/case2_VB20017970/2020 | <i>Homo sapiens</i> | Asia / Hong Kong                                    | 2020-01-21 | Prince of Wales Hospital                                                                                           | Hong Kong Department of Health                                                                                     | Alan K.L. Tsang, Peter C.W. Yip, Edman T.K. Lam, Rickjason C.W. Chan, Dominic N.C. Tsang                                                                                                                                                                                                                                                                                                       |
| 571 | EPI_ISL_417075 | hCoV-19/USA/WA-S22/2020                 | <i>Homo sapiens</i> | North America / USA / Washington / Snohomish County | 2020-03-02 | Washington State Department of Health                                                                              | Seattle Flu Study                                                                                                  | Chu et al                                                                                                                                                                                                                                                                                                                                                                                      |
| 572 | EPI_ISL_417082 | hCoV-19/USA/WA-S29/2020                 | <i>Homo sapiens</i> | North America / USA / Washington / Grant County     | 2020-03-02 | Washington State Department of Health                                                                              | Seattle Flu Study                                                                                                  | Chu et al                                                                                                                                                                                                                                                                                                                                                                                      |
| 573 | EPI_ISL_417093 | hCoV-19/USA/WA-S40/2020                 | <i>Homo sapiens</i> | North America / USA / Washington / Snohomish County | 2020-02-28 | Washington State Department of Health                                                                              | Seattle Flu Study                                                                                                  | Chu et al                                                                                                                                                                                                                                                                                                                                                                                      |
| 574 | EPI_ISL_417096 | hCoV-19/USA/WA-S43/2020                 | <i>Homo sapiens</i> | North America / USA / Washington                    | 2020-02-27 | Washington State Department of Health                                                                              | Seattle Flu Study                                                                                                  | Chu et al                                                                                                                                                                                                                                                                                                                                                                                      |
| 575 | EPI_ISL_417117 | hCoV-19/USA/WA-S64/2020                 | <i>Homo sapiens</i> | North America / USA / Washington / King County      | 2020-03-03 | Washington State Department of Health                                                                              | Seattle Flu Study                                                                                                  | Chu et al                                                                                                                                                                                                                                                                                                                                                                                      |

|     |                |                                              |                     |                                                    |            |                                       |                   |                                                                                                                                                                                                                                                                                                 |
|-----|----------------|----------------------------------------------|---------------------|----------------------------------------------------|------------|---------------------------------------|-------------------|-------------------------------------------------------------------------------------------------------------------------------------------------------------------------------------------------------------------------------------------------------------------------------------------------|
| 576 | EPI_ISL_417121 | hCoV-19/USA/WA-S68/2020                      | <i>Homo sapiens</i> | North America / USA / Washington / King County     | 2020-03-04 | Washington State Department of Health | Seattle Flu Study | Chu et al                                                                                                                                                                                                                                                                                       |
| 577 | EPI_ISL_417123 | hCoV-19/USA/WA-S70/2020                      | <i>Homo sapiens</i> | North America / USA / Washington / King County     | 2020-03-05 | Washington State Department of Health | Seattle Flu Study | Chu et al                                                                                                                                                                                                                                                                                       |
| 578 | EPI_ISL_417142 | hCoV-19/USA/WA-S89/2020                      | <i>Homo sapiens</i> | North America / USA / Washington / Umatilla County | 2020-02-29 | Washington State Department of Health | Seattle Flu Study | Chu et al                                                                                                                                                                                                                                                                                       |
| 579 | EPI_ISL_417148 | hCoV-19/USA/WA-S95/2020                      | <i>Homo sapiens</i> | North America / USA / Washington / King County     | 2020-02-28 | Washington State Department of Health | Seattle Flu Study | Chu et al                                                                                                                                                                                                                                                                                       |
| 580 | MT226610       | SARS-CoV-2/KMS1/Homo sapiens/2020/CHN        | <i>Homo sapiens</i> | China                                              | 2020-01-20 | not specified                         | not specified     | Xu,X., Liao,Y., Wang,L., Zhou,X., Xie,Z., Chen,H., Fan,S., Liu,L., Zheng,H., Jiang,G. and Li,Q.                                                                                                                                                                                                 |
| 581 | MT020781       | nCoV-FIN-29-Jan-2020                         | <i>Homo sapiens</i> | Finland                                            | 2020-01-29 | not specified                         | not specified     | Smura,T., Kuivanen,S., Broas,M., Peltola,J., Kallio-Kokko,H. and Vapalahti,O.                                                                                                                                                                                                                   |
| 582 | MT192773       | SARS-CoV-2/nCoV-19-02S/Homo sapiens/2020/VNM | <i>Homo sapiens</i> | Viet Nam: Ho Chi Minh city                         | 2020-01-22 | not specified                         | not specified     | Nguyen,H.T., Cao,T.M., Pham,H.T.T., Vu,N.P.H., Dao,M.H., Huynh,L.T.K., Nguyen,L.T., Nguyen,N.T., Nguyen,T.T.N., Nguyen,A.H., Luong,Q.C., Nguyen,T.V., Tran,K.C., Pham,Q.D., Tran,T., Hoang,C.Q., Nguyen,T.T., Le,H.Q., Phung,T.M., Vo,T.N.A., Nguyen,S.N., Pham,D.T., Nguyen,T.V. and Phan,L.T. |
| 583 | MT192772       | SARS-CoV-2/nCoV-19-01S/Homo sapiens/2020/VNM | <i>Homo sapiens</i> | Viet Nam: Ho Chi Minh city                         | 2020-01-22 | not specified                         | not specified     | Cao,T.M., Nguyen,H.T., Pham,H.T.T., Vu,N.P.H., Dao,M.H., Huynh,L.T.K., Nguyen,L.T., Nguyen,N.T., Nguyen,T.T.N., Nguyen,A.H., Luong,Q.C., Nguyen,T.V., Tran,K.C., Pham,Q.D., Tran,T., Hoang,C.Q., Nguyen,T.T., Le,H.Q., Phung,T.M., Vo,T.N.A., Nguyen,S.N., Pham,D.T., Phan,L.T. and Nguyen,T.V. |
| 584 | MT192765       | SARS-CoV-2/PC00101P/Homo sapiens/2020/USA    | <i>Homo sapiens</i> | USA: CA, San Diego County                          | 2020-03-11 | not specified                         | not specified     | Zeller,M., Anderson,C., Spencer,E., Klitting,R., Robles-Sikisaka,R., Gangavarapu,K., Nicholson,L. and Andersen,K.                                                                                                                                                                               |
| 585 | MT188341       | USA/MN1-MDH1/2020                            | <i>Homo sapiens</i> | USA: MN                                            | 2020-03-05 | not specified                         | not specified     | Plumb,M., Garfin,J. and Wang,X.                                                                                                                                                                                                                                                                 |
| 586 | MT123293       | SARS-CoV-2/IQTC03/Homo sapiens/2020/CHN      | <i>Homo sapiens</i> | China: Guangzhou                                   | 2020-01-29 | not specified                         | not specified     | Zheng,K., Shi,Y., Sun,J., Huang,J., Zhu,A., Sun,F., Zhuang,Z., Dai,J., Chen,Z., Huang,S., Zhang,Z., Li,X. and Wang,Y.                                                                                                                                                                           |
| 587 | MT123292       | SARS-CoV-2/IQTC04/Homo sapiens/2020/CHN      | <i>Homo sapiens</i> | China: Guangzhou                                   | 2020-01-27 | not specified                         | not specified     | Huang,J., Shi,Y., Sun,J., Zheng,K., Zhu,A., Sun,F., Zhuang,Z., Dai,J., Zhang,Z., Huang,S., Wang,Y. and Li,X.                                                                                                                                                                                    |
| 588 | MT159716       | 2019-nCoV/USA-CruiseA-18/2020                | <i>Homo sapiens</i> | USA                                                | 2020-02-24 | not specified                         | not specified     | Paden,C.R., Tao,Y., Queen,K., Uehara,A., Zhang,J., Li,Y., Wang,H., Kamili,S., Lu,X., Lynch,B., Sakthivel,S.K.K., Whitaker,B.L., Wang,L., Murray,J.R., Padilla,J., Lee,J., Gerber,S.I., Lindstrom,S. and Tong,S.                                                                                 |
| 589 | MT012098       | SARS-CoV-2/29/Homo sapiens/2020/IND          | <i>Homo sapiens</i> | India: Kerala State                                | 2020-01-27 | not specified                         | not specified     | Yadav,P.D., Potdar,V. and Abraham,P.                                                                                                                                                                                                                                                            |
| 590 | MT126808       | SARS-CoV-2/SP02/Homo sapiens/2020/BRA        | <i>Homo sapiens</i> | Brazil                                             | 2020-02-28 | not specified                         | not specified     | Amgarten,D., Malta,F., Ruiz,R.M., Petroni,R., Santana,R.A.F., de Menezes,F.G., Manguiera,C.L.P. and Pinho,J.R.R.                                                                                                                                                                                |
| 591 | MT049951       | SARS-CoV-2/Yunnan-01/Homo sapiens/2020/CHN   | <i>Homo sapiens</i> | China: Yunnan                                      | 2020-01-17 | not specified                         | not specified     | Fu,X., Li,D. and Sun,Y.                                                                                                                                                                                                                                                                         |
| 592 | MT044258       | 2019-nCoV/USA-CA6/2020                       | <i>Homo sapiens</i> | USA: CA                                            | 2020-01-27 | not specified                         | not specified     | Zhang,J., Queen,K., Li,Y., Tao,Y., Uehara,A., Paden,C.R., Lu,X., Lynch,B., Sakthivel,S.K.K., Whitaker,B.L., Kamili,S., Wang,L., Murray,J.R., Gerber,S.I., Lindstrom,S. and Tong,S.                                                                                                              |

593

MT039887

2019-nCoV/USA-WI1/2020

*Homo sapiens*

USA: WI

2020-01-31

not specified

not specified

Zhang,J., Uehara,A., Queen,K., Li,Y., Tao,Y., Paden,C.R., Lu,X.,  
Lynch,B., Sakhivel,S.K.K., Whitaker,B.L., Kamili,S., Wang,L.,  
Murray,J.R., Gerber,S.I., Lindstrom,S. and Tong,S.

<sup>1</sup>Red colored sequences represent only one haplotype
